# Supplementary material for: Research on the identification and evolution of health industry policy instruments in China
Source: Frontiers journal article supplement (doi:10.3389/fpubh.2024.1264827), 2024-02-19
Supplement: Table_5.XLSX [file Table_5.XLSX]

## Sheet: original
policy_name	policy	technology	fund	talent	infrastrcture	public_service	goal_planning	regulation	financial	strategy	gov_purchase	demonstration_proj	market	subsidy	other
天津市人民政府办公厅关于印发贯彻落实京津冀及周边地区大气污染防治协作机制会议精神12条措施的通知	一、抓好任务落实 《贯彻落实京津冀及周边地区大气污染防治协作机制会议精神的12条措施》(以下简称《12条措施》)重点任务分为既定任务、新增任务两部分。其中,既定任务源自清新空气行动方案重点任务分解表和美丽天津一号工程目标责任书,主要是根据当前工作进展,对需要调整细化的部分重点任务进一步明确了新的完成时限和进度要求;新增任务是依据国家和我市新要求,新增加的任务或任务量。 各区县人民政府和各牵头部门要进一步加强领导,继续抓好清新空气行动方案重点任务分解表各项任务落实,具体分解细化《12条措施》各项重点任务。对于不能按时限要求完成任务的,各牵头部门要依法依规追究责任。不能按时完成任务的区县人民政府,要向市人民政府报告原因,并限期整改。	0	0	0	0	1	0	0	0	0	0	0	0	0	0
陕西省人民政府办公厅关于印发陕西省医药监督管理局职能配置内设机构和人员编制规定的通知	三、内设机构 (四)安全监管处 制定全省基本药物目录,组织制定非处方药制度,审定并公布非处方药物目录;审核临床药理基地;负责药品不良反应监测;拟定、修订药物非临床研究质量、临床试验质量管理规范及药品生产质量、医疗单位制剂管理规范并监督实施,依法核发药品生产企业、医疗单位制剂许可证。	0	0	0	0	0	0	1	0	0	0	0	0	0	0
青海省人民政府办公厅关于印发青海省医疗卫生服务体系规划(2016—2020年)的通知	第一节完善医疗卫生服务体系功能 四、鼓励社会资本举办医疗卫生机构 加强社会办医疗机构与公立医疗卫生机构的分工协作,提高医疗卫生资源的整体效率。优先支持社会力量举办非营利性医疗机构,引导社会力量直接投向资源稀缺地区及满足多元需求的服务领域,也可以多种形式参与国有企业所办医疗机构及部分公立医院改制重组。鼓励公立医院与社会力量以合资合作的方式共同举办新的非营利性医疗机构,满足群众多层次、多元化的医疗服务需求。形成公立医院和社会办医院公平竞争、相互促进、共同发展的格局。完善配套支持政策,支持将社会办医院纳入医保定点范围,并在医疗机构等级评审、人员职称评定、继续教育等方面给予平等待遇。 建立社会力量参与公共卫生工作的机制。政府通过购买服务等方式,鼓励和支持社会力量参与公共卫生工作,并加强技术指导和监督管理。	0	0	0	0	0	0	0	0	0	1	0	1	0	0
江西省人民政府关于建立全科医生制度的实施意见	二、逐步建立规范的全科医生培养制度 (七)统一学位授予标准。具有;00年制临床医学本科及以上学历者参加全科医生规范化培养合格后,并符合国家学位要求的,授予临床医学(全科方向)相应专业学位。具体办法按国家相关政策执行。	0	0	1	0	0	0	0	0	0	0	0	0	0	0
内蒙古自治区人民政府办公厅关于印发水污染防治工作方案的通知	三、制度措施 (一)严格环境执法监管 1.完善地方法规标准 健全地方法规。出台《内蒙古自治区饮用水水源保护条例》、《内蒙古自治区呼伦湖国家级自然保护区条例》等法规、政策,研究制定地下水管理、环境监测等地方性法规规章。(自治区法制办牵头,发展改革委、经济和信息化委、国土资源厅、环保厅、住房城乡建设厅、交通运输厅、水利厅、农牧业厅、卫生计生委、保监局等参与) 完善地方标准。严格执行国家各项环境质量标准及污染物排放标准,围绕水质改善目标,拟推进制定煤化工(煤制油或煤制气)污染物排放地方标准,按照行业类别、地域分别或统一制定。结合实际情况在水质长期不达标的区域实施水污染物特别排放限值。(自治区环保厅牵头,发展改革委、经济和信息化委、国土资源厅、住房城乡建设厅、水利厅、农牧业厅、质监局等参与)	0	0	0	0	0	0	1	0	0	0	0	0	0	0
西藏自治区人民政府关于进一步扶持和促进藏医药事业发展的意见	七、夯实基础,广辟渠道,为藏医药事业发展创造条件 (十八)藏医医疗服务和藏药纳入医疗保障政策和基本药物政策范围。在城镇职工基本医疗保险、城镇居民基本医疗保险、农牧区医疗等医疗保障制度中,将符合基本医疗保险规定的藏医医疗服务和藏药纳入医疗保障政策和基本药物政策范围;将符合基本医疗保险定点医疗机构管理规定的藏医医疗机构纳入我区基本医疗保险定点医疗机构管理范围;将符合基本医疗保险诊疗项目、医疗服务设施范围和支付标准规定的藏医诊疗项目、藏医医疗服务设施纳入我区基本医疗保险统筹基金支付范围。在价格制定、临床应用、报销比例中充分考虑藏医药特点,鼓励使用藏药。努力争取国家有关部门将符合条件的藏药逐步纳入《国家基本药物目录》。制订《西藏自治区基本用药藏药目录》,增加自治区职工医疗保险和农牧区医疗药物目录中的藏药品种,加大藏药的政府采购力度。县级藏医院(科)、乡(镇)卫生院必须配置自治区基本用药目录规定的…	0	0	0	0	0	0	0	0	0	1	0	0	0	0
江西省人民政府关于建立全科医生制度的实施意见	三、多渠道培养合格的全科医生 (十一)大力开展全科医生转岗培训。通过多渠道培养方式,力争到;00年,全省每个基层医疗卫生机构都有合格的全科医生。对符合条件的基层在岗执业(助理)医师,省卫生厅、省财政厅根据规划,按需对其进行1-;00年的转岗培训,补助标准按国家有关规定和标准执行,加大对安置在基层医疗卫生机构的“三支一扶”支医大学生转岗培训力度。转岗培训以提升基本医疗和公共卫生服务能力为主,在国家认定的全科医生规范化培养基地进行,培训结束通过省卫生厅组织的统一考试,获得全科医生转岗培训合格证书,可按有关规定转为相应资格的全科医师,并可依据医师执业注册暂行办法规定,变更注册为全科医师或助理全科医师。	0	0	1	0	1	0	0	0	0	0	0	0	1	0
安徽省人民政府办公厅关于印发安徽省医疗卫生领域财政事权和支出责任划分改革实施方案的通知	从公共卫生、医疗保障、计划生育、能力建设四个方面,划分我省医疗卫生领域财政事权和支出责任。	0	0	0	0	0	0	0	0	0	0	0	0	0	1
河北省人民政府办公厅关于印发河北省“十四五”医疗卫生服务体系规划的通知	二、总体要求 (二)基本原则。 2.坚持需求导向,平急结合。合理确定医疗卫生机构的数量、规模、布局,提升资源配置效率;立足平时需求和保障重大疫情防控需要,提高平急结合和快速转换能力,维护公共卫生安全。	0	0	0	0	1	0	0	0	0	0	0	0	0	0
云南省人民政府办公厅关于印发全省发展中医药大会重点任务分解方案的通知	七、着力加快中医药产业发展 (三十五)加快提升品牌影响力加强中药品牌培育,选择一批特色鲜明、使用方便、国内外需求旺盛、药味相对简单的代表性品种,按照国际规范进行系统研究开发,形成知名品牌,进入国际国内医药主流市场。集中精力做好名牌产品的生产营销,持续巩固和发展名牌的地位和声誉。力争到;00年,全省中药(民族药)新增无公害/绿色/有机产品认证10个、地理标志保护产品4个、地理标志注册商标2件。(牵头单位:省工业和信息化委;配合单位:省科技厅、农业厅、食品药品监管局、工商局、质监局)	0	0	0	0	0	1	0	0	0	0	0	0	0	0
河南省人民政府办公厅关于印发河南省2009年度主要污染物总量减排计划实施方案的通知	六、保障措施 (一)严格污染减排目标考核,落实减排目标问责制和“一票否决”制。按照省委、省政府关于实行节能减排目标问责制和“一票否决”制的规定,将污染减排作为一项约束性指标,列入全省经济社会发展年度综合考评体系,对没有完成污染物总量减排任务的地方政府领导班子和领导干部,实行严格的问责制和“一票否决”制。	0	0	0	0	0	0	1	0	0	0	0	0	0	0
吉林省人民政府关于加快推进医药健康支柱产业发展的实施意见	二、重点推进工作 (八)完善医疗与健康服务体系。坚持特色发展和整体推进,进一步完善医疗卫生服务体系,形成多元化办医格局,有重点地发展优势学科和病种诊疗,强化基层医疗、康复和护理服务能力,明显提升各类医疗机构服务质量和水平。加快健康养老、医疗保险、健康体检等服务行业发展步伐,建立与经济社会发展水平相适应的健康保险服务体系。到;00年,医疗与健康服务业实现营业收入370亿元。 5.推动健康服务多样化发展。积极开展健康体检及咨询服务,加强各类健康体检、咨询机构建设,引导体检机构提高服务水平。积极开展全民健身活动。建立健全健康保险服务机制。加大健康保险产品创新力度,为参保对象提供多样化选择。	0	0	0	0	1	0	0	0	0	0	0	0	0	0
江苏省人民政府办公厅关于转发省体育局江苏省城市社区“10分钟体育健身圈”建设实施方案的通知	五、组织实施 (四)抓好长效管理。城市社区是居民享受公共体育服务的主要场所,要从满足群众体育生活化需要出发,加强城市社区公共体育设施和服务的长效管理。紧紧抓住开展“10分钟体育健身圈”建设的有利时机,努力打造设施良好、功能完善、管理科学、服务周到的公共体育健身服务圈。突出抓好电子地图绘制、新城区公共体育设施建设、老城区公共体育设施改造、健身组织延伸覆盖、社会体育宣传等重点环节,确保如期完成城市社区“10分钟体育健身圈”建设任务。	0	0	0	0	1	0	0	0	0	0	0	0	0	0
内蒙古自治区人民政府办公厅关于印发自治区2016年度大气污染防治实施计划的通知	三、保障措施 (四)严格考核奖惩 6.;00年12月底812呼和浩特市玉泉区呼市建委供暖处七车间DZL7-00/95/70--AII生活供热103590拆并/改气00.7212	0	0	0	0	0	0	0	0	0	0	0	0	0	1
内蒙古自治区人民政府办公厅关于印发自治区2016年度大气污染防治实施计划的通知	三、保障措施 (二)多渠道筹措治理资金 各级财政安排使用有关资金时,要优先支持列入年度实施计划的污染治理项目,继续将必要的大气污染监测、监管能力建设及执法监督经费纳入预算予以保障。今年自治区本级财政将继续加大对大气污染防治的支持力度,在中央和自治区本级大气污染治理专项资金分配时,采取“以奖代补”等方式,对按时完成大气污染治理任务、环境空气质量改善显著的地区给予奖励。要创新投入机制,建立政府、企业、社会多元化投融资机制,拓宽融资渠道。推进企业绿色信贷、绿色证券,将企业环境信息纳入征信系统,严格限制违法企业贷款和上市融资。加大环保基金支持力度,优先对技术水平高、环境效益好的建设项目给予资金支持。	0	1	0	0	0	0	0	1	0	0	0	1	1	0
河南省人民政府办公厅关于印发河南省2010年度主要污染物总量减排计划实施方案的通知	三、;00年主要污染物新增排放量预测 (二)二氧化硫新增排放量预测。 燃煤火力发电行业:;00年我省发电总量2068亿千瓦时,;00年我省发电量计划增长00%,达到2300亿千瓦时,新增发电量232亿千瓦时。按火力发电量占总发电量的95%计算,;00年我省新增火力发电量为00亿千瓦时。按320克标煤/千瓦时计算,;00年我省燃煤发电增加原煤消耗00万吨。按原煤平均含硫量00%、“三同时”(污染治理设施与主体工程同时设计、同时施工、同时投产)执行率85%、综合脱硫效率80%计算,;00年我省火力发电行业新增二氧化硫排放量约为00万吨。 非电行业:;00年我省单位生产总值能耗预计下降5%左右,达到00吨标煤/万元,;00年我省单位生产总值能耗下降00%,达到00吨标煤/万元。;00年我省生产总值增幅预计为10%,达到18764亿元(;00年价格水平),以此计算;00年我省将新增能源消费188…	0	0	0	0	0	1	0	0	0	0	0	0	0	0
黑龙江省人民政府办公厅关于推进医疗保障基金监管制度体系改革的实施意见	四、健全和完善规范严格的监管执法体系 (十一)推进基金监管规范执法。推行“双随机、一公开”监管机制,确保基金监督检查公开、公平、公正。严格执行行政执法公示制度、执法全过程记录制度和重大执法决定法制审核制度,推进基金监管行政执法规范化建设。完善医疗保障行政处罚程序规定,出台规范医疗保障行政处罚裁量权基准,有效规范执法行为。〔牵头单位:省医保局;责任单位:省司法厅,各市(地)、县(市)政府(行署)〕	0	0	0	0	0	0	1	0	0	0	0	0	0	0
内蒙古自治区人民政府办公厅关于印发自治区2016年度大气污染防治实施计划的通知	三、保障措施 (四)严格考核奖惩 1.;00年12月底724呼和浩特市新城区中化地质矿山总局内蒙古地质勘查院锅炉房生活供热41436拆并/改气00.08841	0	0	0	0	0	0	0	0	0	0	0	0	0	1
甘肃省人民政府办公厅关于2013年上半年省政府环保目标责任书落实情况及污染减排工作进展情况的通报	一、省政府环保目标责任书进展情况 (二)环境质量状况。;00年上半年,全省14个市州政府所在地城市中空气质量达到二级标准的有7个,占50%;达到三级标准的城市有4个,占00%;超过三级标准的城市有3个,占00%。平凉、武威、陇南可吸入颗粒物平均值与上年同期相比有所下降,兰州、白银、酒泉、嘉峪关、金昌、张掖可吸入颗粒物平均值比上年同期均有不同程度上升;14个城市二氧化氮污染浓度较低,与上年相比变化不大,临夏二氧化氮平均浓度低于国家二级标准限值要求,其他城市低于国家一级标准限值要求;金昌、临夏二氧化硫平均值超过国家二级标准限值要求,比上年同期分别上升00%、22%,其他城市二氧化硫平均值符合国家二级标准要求。全省河流水质监测的50个断面中,按功能类别达标的有38个,占监测断面总数的76%,与上年同期持平。国家考核断面大河家桥、五佛寺、葡萄园、玛曲桥断面水质按功能类别达标,长庆桥断面为Ⅳ类水质…	0	0	0	0	0	1	0	0	0	0	0	0	0	0
甘肃省人民政府办公厅印发关于加快中医药特色发展若干措施的通知	六、实施中医药特色人才培养工程 (一)提高中医药教育整体水平。建立以中医药课程为主线、先中后西的中医药类专业课程体系,增设中医疫病课程。逐步增加中医(全科医学领域)专业学位硕士研究生招生计划,到;00年招生规模达到400人/年。推动中医学、中西医临床医学“5+3”一体化培养模式改革,开展中医学、中西医临床医学专业九年制人才培养试点。推动教育部、国家中医药管理局和省政府三方共建甘肃中医药大学,到;00年,力争建设3门左右国家级和20门左右省级中医药一流本科课程。(省教育厅、省卫生健康委)	0	0	1	0	0	1	0	0	0	0	0	0	0	0
宁夏回族自治区人民政府办公厅关于开展大气污染防治工作强化督查的通知	二、核查内容 (一)各地级市人民政府、宁东管委会年度减排计划制定、分解落实情况及重点减排项目实施进展情况。	0	0	0	0	1	0	0	0	0	0	0	0	0	0
重庆市人民政府办公厅关于印发2017年大气污染防治重点工作目标任务分解的通知	六、增强监管能力 完善法律法规 40.①推进出台《重庆市大气污染防治条例》,细化国家法律的部门责任规定,把我市好的做法和经验上升为地方法规。 ②做好《重庆市大气污染防治条例》解读、宣讲、培训和贯彻等工作。 市环保局 各区县(自治县)人民政府,市政府有关部门,有关单位 完善排放标准 41.完成重庆市非道路移动机械大气污染物排放标准的编制工作,开展制订餐饮油烟大气污染物排放标准。 市环保局 市质监局 加强空气污染应急监测 42.在空气质量已超标时期,加强对主城区和***重点大气污染源的环境监测,在1―2月、11―12月重点加密监测火电、水泥、钢铁等重点企业氮氧化物、烟粉尘排放;在6―9月重点加密监测整车制造、汽车配件、印刷包装等涂装企业挥发性有机物排放。 市环保局 各区县(自治县)人民政府 推行差别化电价政策	0	0	0	0	0	0	1	0	0	0	0	0	0	0
河南省人民政府关于印发河南省全民健身实施计划(2011—2015年)的通知	五、组织实施 (一)加强组织领导。本实施计划在省政府领导下,由省体育局会同有关部门、群众组织和社会团体共同实施。各省辖市、县(市、区)政府要结合当地实际,制定本地的《全民健身实施计划》,并责成体育部门会同相关部门和组织共同组织实施。 各级体育部门要切实提高认识,认真履行职责,积极探索全民健身工作的新思路、新办法,加强组织领导,落实政策保障、人员配备、资金投入、监督奖励等措施,并建立目标责任制,签订责任书,实行目标考核。	0	0	0	0	1	0	0	0	0	0	0	0	0	0
辽宁省人民政府办公厅关于印发《政府办基层医疗卫生机构基本药物集中采购实施办法(试行)》的通知	第三章集中采购 第八条基本药物实行以省为单位集中采购、统一配送;发挥集中批量采购优势,招标和采购结合,签订购销合同,一次完成采购全过程,最大限度地降低采购成本,促进基本药物生产和供应。通过建立和规范基本药物采购机制,实现基本药物安全有效、品质良好、价格合理、供应及时,逐步建立起比较完善的基层用基本药物供应保障体系,使群众真正得到实惠。	0	0	0	0	0	0	1	0	0	1	0	0	0	0
江西省人民政府办公厅关于印发《江西省深化医药卫生体制改革2018年下半年重点工作任务》的通知	五、建立完善综合监管制度 30.制定改革完善医疗卫生行业综合监管制度实施意见,建立综合监管协调机制和督察机制。(省卫生计生委、省人社厅、省工商局、省食品药品监管局等部门负责)	0	0	0	0	1	0	0	0	0	0	0	0	0	0
云南省人民政府关于印发云南省“十三五”卫生与健康规划的通知	四、体系支撑 (二)加强全民健康信息化建设 2.建设区域全民健康信息云平台 采取分级部署与云部署相结合的方式,统筹推进省、州市、县三级区域全民健康信息平台建设,逐步实现互联互通、信息共享和业务协同。依托省级全民健康云平台,构建全省人口健康大数据中心,实现全省健康医疗大数据的汇集。探索健康医疗大数据开发应用,选择具备条件的地区和领域先行先试。	1	0	0	0	0	0	0	0	0	0	1	0	0	0
内蒙古自治区人民政府关于印发《内蒙古自治区全民健身实施计划(2011—2015年)》的通知	三、目标任务 (二)主要任务 1.城乡居民身体素质明显提高。统筹城乡、区域和不同人群的体育健身事业发展,不断提高体育健身意识和科学健身水平。进一步推进不同人群国民体质测定工作和体育锻炼达标活动,国民体质测定合格标准的城乡人数比例达到90%,经常参加体育锻炼的人数比例达到35%。	0	0	0	0	0	1	0	0	0	0	0	0	0	0
海南省人民政府办公厅关于印发《海南省“十二五”主要污染物总量减排考核办法》、《海南省“十二五”主要污染物总量减排统计办法》和《海南省“十二五”主要污染物总量减排监测办法》等3个办法的通知	第五条各市县政府、洋浦经济开发区管委会和省直有关部门应当按照年度减排计划及国家总量减排核算有关规定,按时对本行政区域或本部门当年度主要污染物总量减排工作情况开展自查和总结,于次年1月10日前将总结报送省主要污染物总量减排领导小组办公室。	0	0	0	0	1	0	0	0	0	0	0	0	0	0
甘肃省人民政府办公厅关于印发加强全民健身场地设施建设发展群众体育若干措施的通知	三、补齐硬件短板 (四)加强冬季运动场地建设。推广建设室外天然滑冰场、可拆装式滑冰场。鼓励有条件的地区利用公园、城市广场等公共用地,建设以冰雪游憩活动为主的室内外冰雪乐园。鼓励现有滑雪场完善场地配套服务设施,改扩建增容,完善设施功能,提升服务水平。加快推进临洮体育训练基地二期滑冰馆项目建设。(牵头单位:省体育局;责任单位:省发展改革委、省住建厅、省财政厅、省自然资源厅、省林草局,各市州政府、兰州新区管委会)	0	0	0	1	0	0	0	0	0	0	0	0	0	0
山西省人民政府关于印发山西省“十二五”期间深化医药卫生体制改革规划暨实施方案的通知	三、重点任务 (三)积极推进公立医院改革。 3.深入推进试点城市公立医院改革。深入推进公立医院改革试点工作,拓展深化试点内容,创新体制机制,探索建立人事分配、补偿机制,提高服务质量和运行效率。鼓励社会资本对公立医院进行多种形式的公益性投入。以合资合作方式参与改制的不得改变非营利性质。加强国有资产管理,维护职工合法权益。	0	0	0	0	0	0	0	0	0	0	1	1	1	0
河南省人民政府办公厅关于印发河南省促进天使风投创投基金高质量发展实施方案河南省数字经济和生物医药新材料政府引导基金设立方案的通知	二、发展天使风投创投主体 (四)争取外商投资股权投资试点。研究出台合格境外有限合伙人(QFLP)试点政策,依托自由贸易试验区发展跨境投融资,吸引境外投资人和境外资金参与设立市场化母基金,对设立天使风投创投子基金提供外资进入管理便利。(责任单位:省地方金融监管局、商务厅、发展改革委、人行郑州中心支行、河南证监局,郑州、洛阳、开封市政府)	0	0	0	0	0	0	0	1	0	0	1	1	0	0
贵州省人民政府关于批转贵州省主要污染物总量减排统计监测及考核办法的通知	五、污染物排放许可证发放情况 指标定义:根据《责任书》要求,完成对排污单位和城镇生活污水处理厂污染物排放许可证的发放。 数据来源:环保部门。	0	0	0	0	1	0	0	0	0	0	0	0	0	0
天津市人民政府批转市环保局、市发展改革委拟定的天津市"十一五"主要污染物总量减排考核办法的通知	第十条依照《体现科学发展观要求的地方党政领导班子和领导干部综合考核评价试行办法》(中组发〔2006〕14号)的规定,经市人民政府审定后的考核结果,纳入对各区县人民政府和有关责任部门领导班子和领导干部的综合考核环保评价。 考核结果为优秀的,由市人民政府予以通报表彰。 考核结果为未通过的,该地区、该部门的领导干部不得参加年度评奖、不得授予荣誉称号;撤销该地区、该部门获得的市级有关环境保护的荣誉称号;暂停该地区新增主要污染物排放建设项目的环评审批。对未完成市人民政府确定的总量减排计划任务的企业(集团公司),暂停其新增主要污染物排放建设项目的环评审批。 考核未通过且整改不到位或因工作不力造成重大社会影响的,监察部门按照《环境保护违法违纪行为处分暂行规定》(监察部、环保总局令第10号)和《关于印发天津市人民政府行政责任问责制试行办法的通知》(津政发〔2004〕1号)等相关规定追究该地区或部门有关人…	0	0	0	0	0	0	1	0	0	0	0	0	0	0
新疆维吾尔自治区人民政府办公厅关于印发自治区深化医药卫生体制五项重点改革2010年度主要工作安排的通知	二、工作任务 (一)加快推进基本医疗保障制度建设。 3.提高基本医保基金管理水平。主要工作目标: (4)鼓励有条件的地方提高基本医疗保险统筹层次。科学论证、有序开展基本医疗保障经办管理资源整合。探索委托具有资质的商业保险机构经办各类医疗保障管理服务。(人力资源和社会保障厅、卫生厅、保监局负责)	0	0	0	0	0	0	0	1	0	0	0	0	0	0
内蒙古自治区人民政府办公厅关于印发自治区2016年度大气污染防治实施计划的通知	三、保障措施 (四)严格考核奖惩 5.;00年12月底736呼和浩特市新城区内蒙古法官进修学院锅炉房DZL00生活供热2718拆并/改气00.5442	0	0	0	0	0	0	0	0	0	0	0	0	0	1
陕西省人民政府办公厅关于印发省主要污染物排污权有偿使用和交易试点实施方案的通知	三、工作目标 (四)推进产业结构调整。通过开展主要污染物排放指标有偿使用和交易,增强全社会的环境保护意识,调动排污单位的减排积极性,降低污染治理成本,促进产业结构调整和经济转型升级,建立环境保护长效机制,逐步改善环境质量。	0	0	0	0	0	0	0	0	1	0	0	0	0	0
江西省人民政府办公厅关于印发江西省“十三五”中医药发展规划的通知	二、总体要求 (三)发展目标。 --中医药健康服务蓬勃发展。建设国家级中医药健康旅游示范区1个、示范基地2-3个、示范项目30个,打造以中医医疗、养生保健、康复养老、健康旅游为特色的健康小镇10个,培育集团化发展、连锁式经营的中医药养生保健服务企业2-3家。 --中医药继承创新体系不断完善。新建30个国医名师、名老中医药专家及中医学术流派传承工作室,建设10个国家级、50个省部级中医药工程研究中心(工程实验室)、重点实验室等创新平台。引进、培养中医药高层次人才和紧缺人才各100名,其中,力争引进或培养国医大师1-2名、院士1名。建设国家科技创新团队1个、国家一流学科2个以上,以及一批博士后科研流动站、工作站和创新实践基地。 --中医药对外交流合作更加广泛。实施以热敏灸海外推广计划为主的对外合作交流工程,在海外建设热敏灸馆6-10个,岐黄国医外国政要江中体验中心影响力不断扩大。	0	0	1	0	0	1	0	0	0	0	1	1	0	0
云南省人民政府办公厅关于促进“互联网+医疗健康”发展的实施意见	二、主要任务 (一)以为民惠民为目标,让群众获取医疗健康服务更便捷 4.开展便捷化用药服务。探索医疗卫生机构处方信息与药品零售消费信息互联互通、实时共享。医疗卫生机构线上开具的慢性病、常见病处方,经药师审核后,可委托符合条件的第三方机构配送。加强基于互联网的短缺药品信息采集和供应业务协同应用,探索建立区域合理用药点评管理系统,加强对基层医疗卫生机构用药指导。(省卫生健康委、省医保局、省市场监管局负责)	1	0	0	0	0	0	0	0	0	0	0	1	0	0
山东省人民政府关于印发《山东省建立城镇职工基本医疗保险制度实施方案》的通知	五、基金征缴与监管 用人单位必须按月向社会保险经办机构申报应缴纳的医疗保险费数额,经社会保险经办机构核定后,在规定的期限内缴纳医疗保险费。各市地要完善基本医疗保险基金的征缴办法,采取有力措施,保证医疗保险基金及时、足额征缴到位。对用人单位未按规定缴纳医疗保险费的要按《社会保险费征缴暂行条例》(国务院令第259号)予以处罚。 破产企业应按照《中华人民共和国企业破产法》及有关规定,优先偿付欠缴的基本医疗保险费,并按当地退休人员人均医疗费一次性向社会保险经办机构缴纳;00年基本医疗保险费,由社会保险经办机构负责支付其退休人员的基本医疗保险费用。 基本医疗保险基金纳入财政专户,实行收支两条线管理,专款专用,任何单位和个人都不得挤占挪用。社会保险经办机构的事业经费不得从基金中提取,由各级财政预算解决。	0	0	0	0	0	0	1	1	0	0	0	0	0	0
内蒙古自治区人民政府办公厅关于印发自治区2016年度大气污染防治实施计划的通知	三、保障措施 (四)严格考核奖惩 2.;00年12月674通辽市科尔沁区生产32418淘汰00.00.55	0	0	0	0	0	0	0	0	0	0	0	0	0	1
山西省人民政府关于开展城镇居民基本医疗保险试点的实施意见	二、参保范围、筹资水平和费用支付 (五)费用支付。城镇居民基本医疗保险基金的使用要坚持以收定支、收支平衡、略有结余的原则。要合理制定城镇居民基本医疗保险基金起付标准、支付比例和最高支付限额,完善支付办法,合理控制医疗费用。城镇居民基本医疗保险基金重点用于参保居民的住院和门诊大病医疗费用支出。在经济基础较好、有管理能力的试点城市可以探索对参保居民的门诊医疗费用进行统筹,充分依托和利用社区卫生服务体系,探索解决参保居民的门诊医疗费用负担问题。简化统筹基金的共付比例,按定点医疗机构级别的高低,统筹基金支付的比例控制在50%以上。探索适合困难城镇非从业居民经济承受能力的医疗服务和费用支付办法,减轻他们的医疗费用负担。城镇居民基本医疗保险基金用于支付规定范围内的医疗费用,其他费用可以通过补充医疗保险、商业健康保险、医疗救助和社会慈善捐助等方式解决。	0	0	0	0	0	0	0	1	0	0	1	0	0	0
国务院办公厅关于印发第二次全国污染源普查方案的通知	二、普查时点、对象、范围和内容 (三)普查内容。 4.集中式污染治理设施。单位基本情况,设施处理能力、污水或废物处理情况,次生污染物的产生、治理与排放情况。 废水污染物:化学需氧量、氨氮、总氮、总磷、五日生化需氧量、动植物油、挥发酚、氰化物、汞、镉、铅、铬、砷。 废气污染物:二氧化硫、氮氧化物、颗粒物、汞、镉、铅、铬、砷。 污水处理设施产生的污泥、焚烧设施产生的焚烧残渣和飞灰等产生、贮存、处置情况。	0	0	0	0	1	0	0	0	0	0	0	0	0	0
青海省人民政府办公厅转发省卫生厅关于青海省2004年农村牧区新型合作医疗扩大试点工作方案的通知	五、试点形式 在借鉴首批试点县工作经验的基础上,按照《管理办法》,实行以大病统筹为主,大病统筹与家庭账户和医疗救助相结合的模式。扩大试点县根据本地实际,制定实施方案和实施细则,报州(地、市)合管办审核、省合管办复审同意后,由县人民政府批准实施。	0	0	0	0	0	0	0	0	0	0	1	0	1	0
国务院办公厅关于印发控制污染物排放许可制实施方案的通知	七、做好排污许可制实施保障 (十七)加强组织领导。 各地区要高度重视排污许可制实施工作,统一思想,提高认识,明确目标任务,制定实施计划,确保按时限完成排污许可证核发工作。要做好排污许可制推进期间各项环境管理制度的衔接,避免出现管理真空。环境保护部要加强对全国排污许可制实施工作的指导,制定相关管理办法,总结推广经验,跟踪评估实施情况。将排污许可制落实情况纳入环境保护督察工作,对落实不力的进行问责。	0	0	0	0	1	0	0	0	0	0	0	0	0	0
山西省人民政府办公厅关于印发山西省深化医药卫生体制改革2014年重点工作任务的通知	一、加快推动公立医院改革 (一)推进公立医院规划布局调整。按照国家卫生服务体系规划以及卫生资源配置标准,制订区域卫生规划与医疗机构设置规划,并向社会公布。将区域内各级各类医疗机构统一纳入规划,每千常住人口医疗卫生机构床位数达到4张的,原则上不再扩大公立医院规模。进一步明确公立医院保基本的职能,优化结构布局,严格控制公立医院床位规模和建设标准。(省卫生计生委、省发展改革委、省财政厅负责。排在第一位的部门为牵头部门,分别负责为各部门分别牵头,下同)	0	0	0	0	1	0	0	0	0	0	0	0	0	0
内蒙古自治区人民政府办公厅关于印发《内蒙古自治区本级职工基本医疗保险管理办法》等五个办法的通知[附：内蒙古自治区本级职工大额医疗保险管理办法、内蒙古自治区本级职工基本医疗保险费用结算办法、内蒙古自治区本级职工基本医疗保险转诊转院和特殊医疗项目检查及治疗管理办法、内蒙古自治区本级职工基本医疗保险个人账户及社会保障卡管理办法]	第七章附则 第十二条异地安置退休人员和因工作需要驻外工作一年以上的参保人员,在当地定点医疗机构和定点零售药店发生的符合有关规定的门诊、住院或紧急抢救的医疗费用,由本人或家属持外埠就医审批表、所住定点医疗机构或定点零售药店的病历资料或复印件、诊断证明、复式处方、医疗费用结算单等有关凭证到医保局办理支付手续。住院医疗费用按参保所在地住院报销比例执行,门诊医疗费从个人账户中支付。	0	0	0	0	0	0	1	0	0	0	0	0	0	0
青海省人民政府办公厅关于印发青海省医疗卫生服务体系规划(2016—2020年)的通知	第一节配置原则 一、医疗卫生服务体系构架 医疗卫生服务体系的总体结构分为医院、基层医疗卫生机构和专业公共卫生机构。 医院分为公立医院和社会办医院。其中,公立医院分为政府办医院(根据功能定位主要划分为县办医院、市(州)办医院省办医院、部门办医院)和其他公立医院(主要包括军队医院、国有和集体企事业单位等举办医院)。 县级以下为基层医疗卫生机构,分为公立和社会办两类。 专业公共卫生机构划分为政府办专业公共卫生机构和其他专业公共卫生机构(主要包括国有和集体企事业单位举办的专业公共卫生机构)。根据属地层级的不同,政府办专业公共卫生机构划分为县办、市(州)办和省办三类。	0	0	0	0	1	0	0	0	0	0	0	0	0	0
安徽省人民政府办公厅关于印发安徽省药品和医疗器械安全突发事件应急预案的通知	6.保障措施00队伍保障 省应急指挥部成员单位、专家组、药品检验机构、药品不良反应监测机构,以及各市、县的药品应急处置力量,是全省药品安全突发事件应急处置专业队伍。各级政府和有关部门应不断加强业务培训和应急演练,提高队伍素质,提高装备水平,并动员社会团体、企事业单位及志愿者等各种社会力量参与应急处置工作。 00医疗保障 卫生部门负责组建应急专业医疗救治队伍,指定应急救治机构,根据需要及时赶赴现场开展医疗救治。 00交通运输保障 交通、公安等有关部门要保证发生药品安全突发事件时应急交通工具的优先安排、优先调度、优先放行。根据应急处置工作需要,政府相关部门要对事发地现场及相关通道实行交通管制,开设应急救援“绿色通道”,确保应急运输畅通。 00资金保障 药品安全突发事件应急处置工作经费,由同级财政部门予以保障。对事件应急处置急需的资金,事发地政府要统筹安排,在事件处置结束后向相关责任单位追缴。	0	0	0	0	1	0	0	0	0	0	0	0	0	0
安徽省人民政府办公厅关于建立健全医疗保障基金使用监管长效机制的若干意见	二、工作举措 (三)强化社会力量协同监管机制。 20.定期曝光典型案例。严格按照《国家医保局关于建立基金监管重大案情曝光台的通知》要求,通过网站、新闻发布会、微信公众号、广播电视台、报纸等新闻媒体或公共平台,依法依规及时曝光欺诈骗保典型案件,切实增强震慑效应,正确引导社会舆论。(责任单位:省医保局)	0	0	0	0	1	0	0	0	0	0	0	0	0	0
吉林省人民政府办公厅关于印发吉林省进一步加强乡村医生队伍建设实施方案的通知	十、工作要求 (二十四)落实资金投入。县级政府要将乡村医生队伍建设相关经费纳入财政预算。省级财政要对乡村医生队伍建设予以支持,进一步加大对困难地区的补助力度。各市县财政要及时足额下拨乡村医生队伍建设相关经费,确保专款专用,不得截留、挪用、挤占。	0	1	1	0	0	0	0	0	0	0	0	0	1	0
江西省人民政府办公厅关于印发江西省“十三五”中医药发展规划的通知	三、主要任务 (三)全面提升中药产业发展水平。 4.大力推进中药绿色制药。以关键技术和共性技术突破为重点,推进中药工业数字化、网络化、智能化建设,加强集成和工艺创新,提升中药制造现代化、标准化水平。支持开展炮制、提取、浓缩干燥、成型等节能环保中药制药设备研发与产业化。推广中药绿色制造技术和工艺,实现中药药渣的综合利用。	1	0	0	0	0	0	0	0	0	0	0	0	0	0
吉林省人民政府办公厅关于印发吉林省建立和规范政府办基层医疗卫生机构基本药物采购机制实施办法(暂行)的通知	二、建立和规范基本药物采购机制的主要措施 (十二)建立严格的诚信记录和市场清退制度。对供货企业在采购过程中提供虚假证明文件,蓄意抬高价格或恶意压低价格,中标后拒不签订合同,未按合同规定及时配送供货,向采购机构、医疗卫生机构和个人进行贿赂或变相贿赂的,一律记录在案并按以下规定进行处罚:一次违规严厉警告,并限期纠正或整改;逾期不改或二次违规的,由省卫生行政部门将违规企业和法人代表名单及违规情况向社会公布,;00年内不允许该企业及其法人代表参与我省任何药品的招标采购;违反法律的,要依法惩处。对参与以上违法违规行为的有关机构、部门及相关人员要按照法律法规规定予以严惩。	0	0	0	0	0	0	1	0	0	0	0	0	0	0
广东省人民政府办公厅关于印发广东省深化医药卫生体制改革2016年工作要点的通知	七、加强卫生人才队伍建设 (二)全面实施住院医师规范化培训。按规定对45个住院医师规范化培训基地教学实践活动及培训对象给予补助,新增规范化培训住院医师5200名(含中医住院医师),强化住院医师规范化培训基地内涵建设与动态管理,深入开展培训工作评估。加强医院院长职业化培训。(省卫生计生委负责,省财政厅、发展改革委、教育厅、中医药局、人力资源社会保障厅参与)	0	0	1	0	0	0	0	0	0	0	0	0	1	0
宁夏回族自治区人民政府印发关于落实全国地下水污染防治规划(2011—2020年)实施意见的通知	三、主要工作 (八)建立健全地下水环境监管体系。建立健全地下水环境监测体系。在国土资源、水利及环境保护等部门已有的地下水监测工作基础上,充分衔接“国家地下水监测工程”监测网络,整合并优化地下水环境监测布设点位,完善地下水环境监测网络,实现地下水环境监测信息共享。建立重点地区地下水污染监测系统,实现对人口密集和重点工业园区、地下水重点污染源区、重要水源等地区的有效监测;强化水厂的地下水取水检测能力(取水点控)、地下水区域性污染因子和污染风险的识别能力,增加检测项目,提高检测精度,强化地下水水质突变等异常因子识别。	0	0	0	0	1	0	0	0	0	0	0	0	0	0
广西壮族自治区人民政府办公厅关于印发广西促进“互联网+医疗健康”发展实施方案的通知	二、建立健全“互联网+医疗健康”支撑体系 (十)健全“互联网+医疗健康”标准体系。 2.按照国家制定的省统筹区域全民健康信息平台应用功能指引、数据标准的具体要求,依据行业统一的互联互通标准和业务技术规范,加快顶层设计,加强规范指引,推动自治区全民健康信息平台建设,实现核心数据统一采集、标准统一使用、接口统一制定、关键应用统一整合、门户统一集成、资源统一管理、安全统一规划等“七个统一”。(责任单位:自治区卫生计生委)	1	0	0	0	0	0	1	0	0	0	0	0	0	0
福建省人民政府办公厅关于完善公立医疗机构药品集中采购工作的若干意见	二、创新机制 (一)建立目录遴选新机制 3.制定省级药品采购目录遴选办法,以各级医疗机构申报品种重合度为主要依据,结合专家评审意见,综合考虑西药与中成药的合理比例、充分考虑国家基本药物、中药保护品种、急抢救药品、妇儿药品等实际用药的需要,合理编制省级药品采购目录。省级药品目录品种数控制在1800种以内,品规数控制在6000种左右。	0	0	0	0	0	0	0	0	0	1	0	0	0	0
北京市人民政府办公厅转发市体委等《关于加强健身气功活动管理意见》的通知	八、禁止在本市公共场所悬挂、张贴带有愚昧迷信色彩、宣扬功法和神化功法创编人的条幅、图像、徽记及其他标识。	0	0	0	0	0	0	1	0	0	0	0	0	0	0
海南省人民政府办公厅关于印发海南省2016年度大气污染防治实施计划的通知	二、年度工作任务及责任分工 (五)逐步提高环境监管能力,加大环保执法力度。 1.逐步提高环境监管能力。 实施重点工业企业大气污染源在线监控系统建设,加大在线监控设备运行维护,不断提高在线监测覆盖率及自动监控数据传输有效率;加强海口、三亚、儋州污染源自动监控中心建设;做好全省县级以上城市(镇)、重点工业园区的环境空气质量自动监测站的运行维护,加强气态污染物量值溯源和量值传递体系以及颗粒物比对体系建设,购置备用设备,提高监测数据的连续性和科学性。(责任单位:各市县政府、洋浦经济开发区管委会;指导督办单位:省生态环保厅)	0	0	0	0	0	0	1	0	0	0	0	0	0	0
福建省人民政府关于建立全科医生制度的实施意见	一、建立全科医生制度的指导思想、基本原则和总体目标 (三)总体目标。到;00年,在我省初步建立起充满生机和活力的全科医生制度,基本形成统一规范的全科医生培养模式和“首诊在基层”的服务模式,全科医生与城乡居民基本建立比较稳定的服务关系,力争实现城乡每万服务人口有4名全科医生的工作目标,全科医生服务水平全面提高,基本适应人民群众基本医疗卫生服务需求。	0	0	0	0	0	1	0	0	0	0	0	0	0	0
甘肃省人民政府办公厅印发关于加快中医药特色发展若干措施的通知	八、实施民族医药发展工程 (一)健全民族医药服务体系。将民族医药发展纳入民族自治地方经济社会发展规划。加强民族医医疗机构建设,鼓励社会力量举办民族医医院和诊所。到;00年,甘南州建成1个区域藏医医疗中心。在少数民族地区综合医院、中医医院和专科医院推广民族医药技术和方药,将更多疗效确切的民族医药医疗机构制剂在全省调配使用。(省卫生健康委、省发展改革委、省民委、省药监局负责)	0	0	0	0	0	1	0	0	0	0	0	1	0	0
河南省人民政府关于印发河南省2009年医药卫生体制改革实施方案的通知	一、加快推进基本医疗保障制度建设 (一)扩大基本医疗保障覆盖面。;00年全省城镇职工基本医疗保险参保率达到85%以上,参保人数达到900万人;城镇居民基本医疗保险参保率达到80%以上,参保人数达到1000万人。巩固新型农村合作医疗(以下简称新农合)发展成果,参合率继续保持90%以上。 责任单位:省人力资源和社会保障厅、卫生厅、财政厅。	0	0	0	0	0	1	0	0	0	0	0	0	0	0
内蒙古自治区人民政府关于水污染防治行动计划的实施意见	三、重点任务 (二)切实推动经济结构转型升级。 推动污染企业退出。城市建成区内现有钢铁、有色金属、造纸、印染、原料药制造、化工等污染较重的企业应有序搬迁改造或依法关闭。 积极保护生态空间。严格城市规划蓝线管理,城市规划区范围内应保留一定比例的水域面积,新建项目一律不得违规占用水域。严格水域岸线用途管制,土地开发利用应留足河道、湖泊的管理和保护范围,非法挤占的应限期退出。 推进循环发展。加强工业水循环利用。推进矿井水综合利用,加强洗煤废水循环利用。鼓励钢铁、纺织印染、造纸、石油石化、化工、制革等高耗水企业废水深度处理回用。促进再生水利用。以缺水及水污染严重地区城市为重点,完善再生水利用设施,工业生产、城市绿化、道路清扫、车辆冲洗、建筑施工以及生态景观等用水,要优先使用再生水。推进高速公路服务区污水处理和利用。具备使用再生水条件但未充分利用的钢铁、火电、化工、制浆造纸、印染等项目,不得批准其…	0	0	0	0	0	0	0	0	1	0	0	0	0	0
河南省人民政府关于印发河南省2009年医药卫生体制改革实施方案的通知	三、健全基层医疗卫生服务体系 (十四)加强以全科医生为重点的基层医疗卫生队伍建设。实施全科医生培养规划和农村卫生人才培养“51111”工程。采取学历教育、在职培训、到城市大医院进修等多种方式,全面开展全科医生培养培训工作,尽快实现基层医疗卫生机构都有合格全科医生的要求。;00年要结合国家部署适时启动培训规划,培训规划经费分级负担意见由省深化医药卫生体制改革领导小组办公室会同省财政厅、卫生厅提出,并报省政府审定。 责任单位:省发展改革委、卫生厅、财政厅、教育厅、人力资源和社会保障厅、中医管理局。	0	0	1	0	0	0	0	0	0	0	0	0	0	0
广东省人民政府关于印发“十二五”期间深化医药卫生体制改革实施方案的通知	六、落实改革工作任务的保障措施 (四)加大投入,强化保障。各级政府要切实加大投入,在安排年度卫生投入预算时,严格落实“政府卫生投入增长幅度高于经常性财政支出增长幅度,政府卫生投入占经常性财政支出的比重逐步提高”的要求。“十二五”期间政府医药卫生体制改革投入力度和强度要高于2009-;00年医药卫生体制改革投入;基本医保政府补助标准和人均基本公共卫生服务经费标准也要随着经济社会发展水平的提高相应提高。加强资金监督管理,提高资金使用效益,坚决防止各种违法违规使用资金行为。	0	1	0	0	0	0	1	0	0	0	0	0	1	0
内蒙古自治区人民政府办公厅关于印发水污染防治工作方案的通知	二、重点任务 (二)加强城镇生活污染治理 3.推进污泥处理处置 污泥应进行稳定化、无害化和资源化处理处置,开展污泥从产生、运输、储存、处置的全过程监管,禁止处理处置不达标的污泥进入耕地,非法污泥堆放点一律予以取缔,杜绝污泥二次污染。污泥处理处置设施应与污水处理设施统筹建设,因地制宜开展污泥集中处置。;00年底前,现有污泥处理处置设施基本完成达标改造;;00年底前,地级城市污泥无害化处理处置率达到90%以上。(自治区住房城乡建设厅牵头,发展改革委、经济和信息化委、环保厅、农牧业厅等参与)	0	0	0	1	0	1	0	0	0	0	0	0	0	0
吉林省人民政府办公厅关于印发吉林省建立和规范政府办基层医疗卫生机构基本药物采购机制实施办法(暂行)的通知	二、建立和规范基本药物采购机制的主要措施 (四)区别情况分类采购。区分基本药物的不同情况,采取不同的采购方式: 2.对必需但用量小的特殊用药、急救用药,采用邀请招标、询价采购或定点生产的方式采购。	0	0	0	0	0	0	0	0	0	1	0	0	0	0
广西壮族自治区人民政府办公厅关于印发广西促进养老托育服务健康发展三年行动方案（2021—2023年）的通知	三、主要任务 (四)完善养老托育服务综合监管体系。 5.切实防范各类风险。做好突发事件应对能力建设,将养老托育服务纳入公共安全重点保障范围。建立政府购买养老托育机构安全管理服务制度。严防“一老一小”领域虚假投资、欺诈销售、高额返利等形式的非法集资。加强对养老服务领域非法集资的防范、监测和预警。常态化开展防范非法集资教育,指导各市县面向老年人开展经常性非法集资识骗防骗教育宣传工作,增强老年人群体对非法集资诈骗的识别和防范能力。严厉打击面向老年人的非法集资、保健品欺诈等违法犯罪行为,及时曝光侵害老年人合法权益的典型案件,维护老年人合法权益。	0	0	0	0	1	0	1	0	0	1	0	0	0	0
内蒙古自治区人民政府办公厅关于印发自治区国民营养计划(2017—2030年)实施方案的通知	一、总体要求 (三)主要目标。到;00年,营养法规标准体系基本完善;营养工作制度基本健全,自治区、盟市、旗县(市、区)营养工作体系逐步完善,基层营养工作得到加强;食物营养健康产业快速发展,传统食养服务日益丰富;营养健康信息化水平逐步提升;重点人群营养不良状况明显改善,吃动平衡的健康生活方式进一步普及,居民营养健康素养得到明显提高。实现以下目标: --降低人群贫血率。5岁以下儿童贫血率控制在12%以下;孕妇贫血率下降至15%以下;老年人群贫血率下降至10%以下;贫困地区人群贫血率控制在10%以下。 --孕妇叶酸缺乏率控制在5%以下;0-6个月婴儿纯母乳喂养率达到50%以上;5岁以下儿童生长迟缓率控制在7%以下。 --农村牧区中小学生的生长迟缓率保持在5%以下,缩小城乡学生身高差别;学生肥胖率上升趋势减缓。 --提高住院病人营养筛查率和营养不良住院病人的营养治疗比例。 --居民营养健康知识知…	0	0	0	0	0	1	0	0	0	0	0	0	0	0
湖北省人民政府办公厅关于印发加快全省医学教育创新发展实施方案的通知	三、完善保障措施 (三)保障经费投入。统筹各方资金资源,加强对医学教育投入保障。按要求落实医学门类专业生均定额拨款标准、住培标准,将医学学科人才培养、科研创新、实训基地和服务社会等情况作为省“双一流”建设资金分配重要参考。支持相关高校优化支出结构,加大对医学人才培养和医学学科建设的投入力度。(省财政厅牵头,省卫健委、省教育厅配合)	1	1	1	1	0	0	0	0	0	0	0	0	0	0
内蒙古自治区人民政府办公厅关于印发自治区2016年度大气污染防治实施计划的通知	三、保障措施 (四)严格考核奖惩 5.;00年12月513鄂尔多斯市鄂托克旗多尔斯宾馆----供热00淘汰00.00.5	0	0	0	0	0	0	0	0	0	0	0	0	0	1
贵州省人民政府关于批转贵州省主要污染物总量减排统计监测及考核办法的通知	八、重点脱硫项目按期投运率 指标定义:列入《责任书》的重点脱硫项目按期投运比例。 数据来源:环保部门。	0	0	0	0	1	0	0	0	0	0	0	0	0	0
福建省人民政府办公厅关于印发2005年度全省治理“餐桌污染”建设“食品放心工程”工作方案的通知	四、治理饮用水污染 (十九)由省建设厅、卫生厅负责开展对全省各市县自来水水质、二次供水及其设施的监督检查,重点抽查设区市大型市政供水单位设施及水质卫生状况,督促街道居委会、社区、物业管理等开展辖区内二次供水设施的清洗工作,查处违法违规行为。	0	0	0	0	0	0	1	0	0	0	0	0	0	0
海南省人民政府办公厅关于印发《海南省土壤污染防治行动计划实施情况评估和考核办法(试行)》的通知	第九条评估和考核结果经省政府审定后,由省生态环境厅向各市县政府通报,并交由组织部门和审计部门分别作为对各市县领导班子和领导干部综合考核评价、自然资源资产离任审计的重要依据。评估和考核结果将作为土壤污染防治相关资金分配的重要参考依据。 对未通过年度评估或终期考核的市县,要提出限期整改意见,整改完成前,暂停审批有关市县重点行业企业建设项目(民生项目与节能减排项目除外)环境影响评价文件;整改不到位的,要约谈有关市县政府及其相关部门负责人。对土壤环境问题突出、区域土壤环境质量明显下降、防治工作不力、群众反映强烈的市县,要约谈有关市县政府和省级相关部门主要负责人。 对评估和考核结果为优秀和进步较大的市县政府进行通报表扬。	0	0	0	0	1	0	0	0	0	0	0	0	0	0
北京市人民政府办公厅转发市人力社保局市、财政局关于北京市市级公费医疗改革办法的通知	第八条参保人员按照城镇职工基本医疗保险的相关规定选择定点医疗机构。即参保人员自行选择4家定点医疗机构,定点中医、定点专科和A类医疗机构可以直接就诊。在定点医疗机构就医需持社会保障卡。	0	0	0	0	0	0	1	0	0	0	0	0	0	0
内蒙古自治区人民政府办公厅关于印发水污染防治工作方案的通知	四、保障机制 (一)强化责任落实 1.强化政府水环境保护责任 各级地方人民政府是实施本工作方案的主体,对本行政区域内的水环境质量负责。自治区政府成立内蒙古自治区水污染防治工作领导小组,由自治区常务副主席任组长,相关分管副主席和环保厅厅长任副组长,其它28个部门主要负责人为领导小组成员。领导小组办公室设在自治区环保厅,办公室主任由环保厅厅长兼任,办公室副主任和联络员由环保厅总工程师兼任。各盟市政府要加强组织领导,成立水污染防治工作领导小组,确定分流域、分区域、分行业、分年度的重点任务和目标,编制工作方案、年度方案及达标方案,并组织实施。各级政府要不断完善政策措施,加大资金投入,统筹城乡水污染治理,强化监管,确保各项任务全面完成。(自治区环保厅牵头,发展改革委、财政厅、住房城乡建设厅、水利厅等参与)	0	0	0	0	1	0	0	0	0	0	0	0	0	0
云南省人民政府办公厅关于加快发展商业健康保险的实施意见	一、扩大商业健康保险供给 (二)加快发展医疗执业保险。推行医疗责任保险、医疗意外保险、艾滋病等传染病专管人员和医护人员职业综合保险等多种形式医疗执业保险。到;00年底前,全省三级公立医院医疗责任保险参保率达到100%,二级公立医院参保率达到90%以上。积极鼓励支持村卫生室、个体诊所和非公立医疗机构参加医疗责任保险。支持医疗机构和医师个人购买医疗执业保险,医师个人购买的医疗执业保险适用于其合法注册的执业地点。鼓励通过商业保险等方式提高医务人员及艾滋病等传染病专管人员的医疗、养老保障水平以及解决医疗职业伤害保障和损害赔偿等问题。(牵头部门:省卫生计生委,云南保监局;配合部门:省财政厅、综治办)	0	0	0	0	0	1	0	1	0	0	0	0	0	0
内蒙古自治区人民政府办公厅关于印发自治区2016年度大气污染防治实施计划的通知	三、保障措施 (四)严格考核奖惩 3.;00年12月616通辽市科尔沁区华玺玉宫CWSH00-85/60-AX洗浴00.5淘汰00.00.252	0	0	0	0	0	0	0	0	0	0	0	0	0	1
国务院办公厅关于支持社会力量提供多层次多样化医疗服务的意见	二、拓展多层次多样化服务 (十)探索发展特色健康服务产业集聚区。医疗资源和区位等基础条件较好的地方,可以探索以社会力量为主,打造特色鲜明、具有竞争力和影响力的健康服务产业集聚区,更好满足国内外较高层次健康消费需求。坚持合理定位、科学规划,在土地规划、市政配套、机构准入、人才引进、执业环境等方面给予政策扶持和倾斜,积极探索体制机制创新,着力打造健康服务产业集群。有条件的地方可探索医疗与养老、旅游、健身休闲等业态融合发展,健康服务与医药研发制造、医学教育相协同的集聚模式。坚持以市场需求为导向,发挥企业在产业集聚中的主体作用,地方各级政府要统筹好本行政区域内的集聚区差异化发展,并提供必要的公共服务和配套支持。坚决避免脱离实际、一哄而上、盲目重复建设,杜绝简单园区建设或变相搞房地产开发。有关部门要加强跟踪指导,及时总结经验,发挥示范作用。	0	0	1	1	0	0	0	0	1	0	1	1	0	0
云南省人民政府办公厅关于促进医药产业健康发展的实施意见	一、总体要求 (三)发展目标 到;00年,我省医药产业结构进一步优化,产业规模进一步壮大,医药资源开发利用率大幅提高,核心竞争力明显提升;体制机制逐步完善,产业发展环境显著改善;医药产业主营业务收入达到1500亿元,年均增长20%左右。	0	0	0	0	0	1	0	0	1	0	0	0	0	0
河南省人民政府关于印发河南省全民健身实施计划(2011—2015年)的通知	四、保障措施 (七)不断加大科学健身指导力度。健全体质测定服务机构,开展城乡居民日常体质测定和科学技术健身指导。依托全民健身活动中心和各类综合性体育中心,逐步建立省、市、县三级体质测定与运动健身指导站网络,为群众进行体质测定、运动能力评定,提供运动健身指导。引导城乡居民经常参加体育健身活动,不断提高体质健康水平。	0	0	0	0	1	0	0	0	0	0	0	0	0	0
河南省人民政府办公厅关于印发河南省推进工业结构调整打赢污染防治攻坚战工作方案的通知	二、调整优化产业布局 (三)大力推动重点行业布局调整。 2.主要任务: (1)支持各省辖市、省直管县(市)深入分析产业现状,按照“有所为有所不为”原则科学确定主导产业,实施传统产业兼并重组、退城入园和优化布局,改变“小、散、乱”状况,加快企业规模化、产业集群化和装备大型化。 (2)鼓励钢铁企业积极参与全国钢铁行业跨地区、跨所有制兼并重组,重点区域城市钢铁企业要采取彻底关停、转型发展、改造升级、省外搬迁等方式推动转型发展,全省整合建设2个大型钢铁联合企业,发展一批“专、精、特”且规模适中的钢铁企业。 (3)依托洛阳、巩义、长葛市等铝加工产业集聚区,大力发展铝精深加工、再生利用,建设有影响力的千亿级铝加工产业集群。 (4)以河南能源化工集团为主体,建设濮阳、鹤壁、永城、义马市4个国内一流的现代煤化工基地;以合成氨骨干企业为主体,打造河南晋开化工、昊华骏化、心连心化工、金山化工4个以多联产精细…	0	0	0	0	0	0	0	0	1	0	0	0	0	0
吉林省人民政府办公厅关于印发吉林省支持社会力量提供多层次多样化医疗服务实施方案的通知	八、强化组织实施 (二十一)强化考核评估。省卫生计生委、省发展改革委要牵头对各地、各有关部门落实本实施方案的情况进行监督跟踪和评估考核,将落实情况纳入省深化医药卫生体制改革考核以及督查督办重点工作,确保各项政策措施落到实处。对不按规定落实促进社会办医加快发展改革措施的,应及时责令改正,并按规定进行追责。	0	0	0	0	1	0	0	0	0	0	0	0	0	0
重庆市人民政府办公厅关于印发2017年大气污染防治重点工作目标任务分解的通知	加强督查考核 48.建立健全“蓝天行动”督查推进机制,将黄标车淘汰、扬尘整治行动、挥发性有机物治理等纳入政府专项督查,结果纳入年度目标任务考核内容,对污染源整改不力的进行通报、约谈、挂牌督办。 市环保局 主城各区人民政府,市城乡建委、市公安局、市市政委、市政府督查室 对空气质量明显下滑的区县(自治县)进行约谈,督促其制定并公布大气污染防治的整改措施。 市环保局 市政府督查室	0	0	0	0	0	0	1	0	0	0	0	0	0	0
河南省人民政府办公厅关于转发河南省医药卫生体制五项重点改革2010年度主要工作安排的通知	二、工作任务 (四)促进基本公共卫生服务逐步均等化。 2.继续实施重大公共卫生服务项目。主要工作目标: (1)继续对15岁以下的人群补种乙肝疫苗,;00年再补种00万人。(省卫生厅负责) (2)在;00年基础上,再完成适龄妇女宫颈癌检查19万人,乳腺癌检查00万人。对00万名农村孕产妇住院分娩进行补助。继续实施农村生育妇女免费补服叶酸项目。(省卫生厅负责) (3)为00万例贫困白内障患者免费实施复明手术。(省卫生厅负责) (4)完成;00年00万户燃煤污染型氟中毒病区改炉改灶任务。(省卫生厅负责) (5)完成;00年00万户无害化卫生厕所建设任务,做好;00年度25万户无害化卫生厕所建设前期准备工作。(省卫生厅负责) (6)实施艾滋病母婴传播阻断项目。(省卫生厅负责) (7)对重大公共卫生服务项目实施情况进行考核评估。(省卫生厅负责)	0	0	0	0	1	1	0	0	0	0	0	0	0	0
广西壮族自治区人民政府办公厅关于加强基层医疗卫生人才队伍建设的实施意见	七、强化组织保障 (十五)加强经费保障。各级财政要将基层医疗卫生机构公益一类保障、农村订单定向医学生培养、乡村医生补助及社会保障等基层医疗卫生人才队伍建设相关经费纳入年度预算,统筹落实好经费保障。	0	1	1	0	0	0	0	0	0	0	0	0	1	0
青海省人民政府办公厅关于提高2016年度全省城乡居民医疗保险筹资标准的通知	一、城镇居民筹资标准 (二)男性19-59周岁(女性19-54周岁),年财政补助由原来的人均400元提高到460元(省补助413元,市(州)县补助47元),个人缴费标准维持人均150元不变;	0	0	0	0	0	0	0	0	0	0	0	0	1	0
陕西省人民政府办公厅关于印发第一次全省污染源普查方案的通知	四、普查组织及实施 (四)普查员和普查指导员的选聘。 2.普查指导员的数量配备原则。 每10名普查员配备1名普查指导员。	0	0	0	0	1	0	0	0	0	0	0	0	0	0
贵州省人民政府关于批转贵州省主要污染物总量减排统计监测及考核办法的通知	一、清洁生产审核率 指标定义:达到《责任书》中规定的清洁生产审核率的情况。 数据来源:经贸部门、环保部门。	0	0	0	0	1	0	0	0	0	0	0	0	0	0
新疆维吾尔自治区人民政府办公厅关于印发自治区2013年主要污染物排放总量控制计划的通知	二、重点减排项目及预期削减能力 (四)氮氧化物重点减排项目。安排氮氧化物重点减排项目57个,预计减排氮氧化物00万吨(不含机动车减排量,见附件5)。 3.;00年机动车预期淘汰量按照;00年环保部核定的淘汰量计算,预计减排00万吨(见附件5)。	0	0	0	0	0	1	0	0	0	0	0	0	0	0
福建省人民政府办公厅关于印发2005年度全省治理“餐桌污染”建设“食品放心工程”工作方案的通知	七、开展食品安全关键技术应用的综合示范项目建设 (四十三)由省科技厅、经贸委、福州大学负责,农业厅、卫生厅、质监局、环保局、供销社、农科院、福建出入境检验检疫局、厦门大学、福建农林大学和福州、厦门、漳州、泉州、莆田、南平、龙岩、宁德市政府配合,开展蔬菜、茶叶食品安全关键技术综合应用体系建设和食品安全学科与人才培训基地的建设工作。	0	0	1	1	0	0	0	0	0	0	0	0	0	0
山西省人民政府关于印发山西省土壤污染防治工作方案的通知	四、组织实施 (一)加强目标考核,严格责任追究。 1.明确地方政府主体责任。 (104)各地人民政府是土壤污染防治的主体,要分别制定并公布土壤污染防治工作方案,确定工作目标、重点任务及其责任单位,并逐年进行分解实施。要加强组织领导,完善政策措施,加大资金投入,创新投融资模式,强化监督管理,抓好工作落实。各市土壤污染防治工作方案于;00年2月底前报省人民政府备案。 牵头单位:省环保厅 参加单位:省发展改革委、省财政厅、省国土资源厅、省住房城乡建设厅、省农业厅等	0	0	0	0	1	0	0	0	0	0	0	0	0	0
新疆维吾尔自治区人民政府办公厅印发贯彻国务院深化医药卫生体制改革领导小组关于进一步推广深化医药卫生体制改革经验的若干意见的实施方案的通知	五、建立符合行业特点的人事薪酬制度,调动医务人员积极性 6.推进薪酬制度改革。各地可结合实际,按照“允许医疗卫生机构突破现行事业单位工资调控水平,允许医疗服务收入扣除成本并按规定提取各项基金后主要用于人员奖励”等要求,合理确定公立医院薪酬水平,逐步提高诊疗费、护理费、手术费等医疗服务收入在医院总收入中的比例。对工作时间之外劳动较多、高层次医疗人才集聚、公益目标任务繁重、开展家庭医生签约服务的公立医疗机构,在核定绩效工资总量时予以倾斜。加强对医务人员的长期激励,建立以公益性为导向的绩效考核机制,薪酬在保持现有水平的基础上实现适度增长。公立医疗机构在核定的绩效工资总量内根据考核结果自主分配绩效工资。薪酬总量核定和个人绩效工资分配不与医疗机构的药品、耗材、大型医学检查等业务收入挂钩,薪酬分配体现岗位的技术含量、风险、贡献等,严禁给医务人员设定创收指标。基层医疗卫生机构可按照财务制度规定在核定的…	0	0	1	0	0	0	0	0	0	0	0	0	0	0
吉林省人民政府办公厅印发关于改革完善全科医生培养与使用激励机制实施方案的通知	四、具体措施 (五)加强贫困地区全科医生队伍建设。 2.职称晋升政策支持。对长期扎根贫困县农村基层工作的全科医生,可突破学历等限制,破格晋升职称。全科专业住院医师规范化培训合格、取得中级职称后在贫困县农村基层连续工作满;00年的,可经职称评审委员会考核认定,直接取得副高级职称,取得的副高级职称原则上应限定在基层医疗卫生机构聘任,由基层医疗卫生机构向上级医疗卫生机构流动时,应取得全省统一的高级职称。(牵头部门:省人力资源社会保障厅,配合单位:省卫生计生委、省中医药管理局)	0	0	1	0	0	1	0	0	0	0	0	0	0	0
北京市人民政府办公厅转发市人力社保局市、财政局关于北京市市级公费医疗改革办法的通知	第十三条区、县社会保险经办机构负责市级国家机关参保的具体业务工作、医疗费用的审核结算和支付。	0	0	0	0	1	0	0	0	0	0	0	0	0	0
青海省人民政府办公厅转发省卫生厅关于青海省2004年农村牧区新型合作医疗扩大试点工作方案的通知	六、基金筹集与管理 (二)筹资程序。 3.乡镇、村集体扶持资金由乡镇政府负责组织收缴,按时汇集到县合管办基金专户。	0	0	0	0	1	0	0	0	0	0	0	0	0	0
广西壮族自治区人民政府办公厅关于印发广西促进“互联网+医疗健康”发展实施方案的通知	二、建立健全“互联网+医疗健康”支撑体系 (十三)加快完善相关配套政策。 4.强化信息应用系统审查备案机制。对已建成和正在新建的医疗健康信息应用系统进行审查备案,进一步清理不按照国家和自治区标准建设、需要二次录入进行数据采集、无法提供数据互联互通共享和信息安全保障的信息应用系统,以及与业务流程长期脱节、功能可由其他系统替代、使用范围小、频度低的“僵尸”信息应用系统。对以上清理出的信息应用系统,自治区财政不再支持建设和提供运行维护资金。(责任单位:自治区卫生计生委、发展改革委、财政厅)	0	0	0	0	1	0	0	0	0	0	0	0	0	0
内蒙古自治区人民政府办公厅关于做好冬季采暖期原煤燃烧污染治理工作的通知	六、切实加大监管力度 燃煤企业要提前做好环保设施检修工作,确保除尘、脱硫、脱硝设施正常运行和稳定达标排放,有效减少污染物排放量。各级环保部门要加大对燃煤企业的日常监督检查力度,增加环境监察和监测频次,确保其污染防治设施高效运转和达标排放。必要时,对相关企业进行驻厂监察。对超标排放、整治措施不落实的,实施限期整改、停产整治和关停,并依法追究有关人员的责任。	0	0	0	0	0	0	1	0	0	0	0	0	0	0
山东省卫生健康委员会等部门关于印发《山东省公立医疗机构药品采购推行“两票制”实施方案》的通知	五、监督管理 (六)医疗保障部门指导省公共资源交易中心,对卫生健康部门核查认定不执行“两票制”的生产企业,取消其相关药品挂网资格;对不执行“两票制”的配送企业,取消其配送资格。加大对药品价格的监测力度。	0	0	0	0	0	0	1	0	0	0	0	0	0	0
内蒙古自治区人民政府办公厅关于印发自治区2016年度大气污染防治实施计划的通知	三、保障措施 (四)严格考核奖惩 2.;00年年底393乌兰察布市集宁区兴盛源建筑保温材料厂生产供热1150拆改00.00.51	0	0	0	0	0	0	0	0	0	0	0	0	0	1
山东省卫生健康委员会等部门关于印发《山东省公立医疗机构药品采购推行“两票制”实施方案》的通知	五、监督管理 (四)商务部门要加强药品流通行业规划指导,配合有关部门规范药品流通市场秩序。	0	0	0	0	1	0	0	0	0	0	0	0	0	0
吉林省人民政府办公厅关于印发吉林省建立和规范政府办基层医疗卫生机构基本药物采购机制实施办法(暂行)的通知	一、建立和规范基本药物采购机制的目标 对实施基本药物制度的政府办基层医疗卫生机构使用的基本药物(包括省增补品种,下同)实行以省为单位集中采购、统一配送;坚持政府主导与市场机制相结合,发挥集中招标采购优势,最大限度地降低采购成本,逐步建立起比较完善的基本药物供应保障体系,确保基本药物安全有效、品质良好、价格合理、供应及时,让群众真正得到实惠。	0	0	0	0	0	0	0	0	0	1	0	1	0	0
吉林省人民政府办公厅印发关于改革完善全科医生培养与使用激励机制实施方案的通知	五、保障措施 (二)深化医保支付方式改革。依托基层医疗卫生机构推行门诊统筹按人头付费,积极探索将签约居民的门诊基金按人头支付给基层医疗卫生机构或家庭医生团队,对于经基层向医院转诊的患者,由基层医疗卫生机构或家庭医生团队支付一定的转诊费用。充分发挥医保基金的杠杆作用,进一步完善差异化的医保支付政策,通过降低起付线、连续计算起付线、提高向下转诊住院报销比例等措施,合理引导居民到基层就诊。加强医联体(医共体)建设,探索实行医保总额付费,合理引导双向转诊,发挥全科医生和家庭医生团队在医保控费方面的“守门人”作用,推动医疗卫生服务由以治病为中心向以健康为中心转变。(牵头部门:省人力资源社会保障厅、省卫生计生委分别负责,配合单位:省中医药管理局)	0	0	0	0	1	0	0	1	0	0	0	0	0	0
广西壮族自治区人民政府办公厅关于印发广西促进“互联网+医疗健康”发展实施方案的通知	三、加强行业监管和安全保障 (十四)健全医疗质量监管机制。 2.互联网医疗健康服务平台等第三方机构应当确保提供服务人员的资质符合有关规定要求,并对所提供的服务承担责任。“互联网+医疗健康”服务产生的数据应当全程留痕,可查询、可追溯,满足行业监管需求。(责任单位:自治区卫生计生委、公安厅)	0	0	0	0	0	0	1	0	0	0	0	0	0	0
新疆维吾尔自治区人民政府办公厅印发贯彻国务院深化医药卫生体制改革领导小组关于进一步推广深化医药卫生体制改革经验的若干意见的实施方案的通知	二、破除以药补医,建立健全公立医院运行新机制 7.落实政府投入责任。全面落实政府对公立医院的投入政策。按照有关规定,逐步偿还和化解符合规定的公立医院长期债务。(自治区财政厅)	0	1	0	0	0	0	0	0	0	0	0	0	0	0
安徽省人民政府办公厅关于加快发展商业健康保险的实施意见	三、全面推进并规范商业保险机构承办城乡居民大病保险和城乡居民基本医疗保险经办管理服务 (三)增强大病保险抗风险能力。承办大病保险的商业保险机构应设立收入账户和赔付支出账户,由财政部门按规定将大病保险费用划入承办机构的收入账户。承办机构必须将大病保险业务与其他保险业务彻底分开,封闭运行,实现单独核算。探索构建科学合理的大病保险风险分担机制,确保大病保险制度长期稳健运行。对于商业保险机构通过加强医疗机构和医师不当医疗行为管控实现大病保险基金的管理性减支,可以建立合理的惩罚激励机制,对医疗机构和医师的不当医疗行为实行惩戒,对保险机构给予适当奖励。	0	0	0	0	1	0	0	1	0	0	0	0	0	0
海南省人民政府办公厅关于调整城镇居民基本医疗保险有关政策的通知	三、关于区域统筹区城镇居民基本医疗保险政策调整 (五)在参保缴费截止日期之后出生的婴儿,在一个结算年度内,随参保母亲享受城镇居民基本医疗保险待遇,所发生的符合规定的医疗费用按其母亲的待遇支付,但母婴两人享受的统筹基金支付总额不能超过其母亲的最高支付限额。	0	0	0	0	0	0	1	0	0	0	0	0	0	0
内蒙古自治区人民政府办公厅关于印发自治区2016年度大气污染防治实施计划的通知	三、保障措施 (四)严格考核奖惩 7.能力建设项目(包括监测预警体系建设项目)清单 附表1 燃煤锅炉淘汰项目清单 序号盟市旗县(区)单位 名称锅炉 编号锅炉型号锅炉用途规模 (蒸吨)耗煤量(吨/年)淘汰 方式减排量(吨/年)总投资(万元)其中淘汰时间烟粉尘二氧化硫氮氧化物中央资金省级财政资金地市财政资金业主单位自筹银行贷款1包头市包头市土右旗祥隆热力有限公司立式水管常压热水4700清洁能源替代00.;00年2包头市包头市土右旗祥隆热力有限公司立式水管常压热水4清洁能源替代;00年3包头市包头市土右旗内蒙古骆驼酒业九峰山酒厂DZL6-00-AII供热生产61500清洁能源替代00.;00年4包头市包头市土右旗内蒙古骆驼酒业九峰山酒厂DZL6-00-AII供热生产6清洁能源替代;00年5包头市包头市固阳县固阳县第一中学、住宅楼供热锅炉CLSG00-90/70-AII供热61500集中供热00…	0	0	0	0	0	0	0	0	0	0	0	0	0	1
河北省人民政府办公厅关于印发河北省中医药健康服务发展规划(2015—2020年)的通知	四、保障措施 (三)完善监管机制。建立健全中医药健康服务监管机制,推行属地化管理,重点监管服务质量,严肃查处违法行为。建立不良执业记录制度,将中医药健康服务机构及其从业人员诚信经营和执业情况纳入统一信用信息平台,引导行业自律。发展规范化、专业化的第三方认证,推进中医药健康服务规范化发展,为政府监管提供技术保障和支撑。	0	0	0	0	0	0	1	0	0	0	0	0	0	0
河南省人民政府办公厅关于印发河南省2010年度主要污染物总量减排计划实施方案的通知	一、总则 (二)编制依据。 7.《河南省人民政府办公厅关于印发河南省水环境生态补偿暂行办法的通知》(豫政办〔2010〕9号)。	0	0	0	0	0	0	1	0	0	0	0	0	0	0
内蒙古自治区人民政府办公厅关于印发自治区2016年度大气污染防治实施计划的通知	三、保障措施 (四)严格考核奖惩 1.;00年12月底815呼和浩特市玉泉区内蒙古祥隆供热有限公司SZL7-00/115/70-AII生活供热103590拆并/改气00.7212	0	0	0	0	0	0	0	0	0	0	0	0	0	1
广东省人民政府办公厅转发省卫生厅关于我省新型农村合作医疗制度建设情况报告的通知	三、下一步工作建议 (五)加强对农村贫困家庭医疗救助工作。要通过提高农村合作医疗统筹层次,把贫困镇村纳入农村合作医疗制度的覆盖范围,帮助农村困难群众参加农村合作医疗,对合作医疗补助后仍有较大困难的农户给予医疗救助。进一步规范和完善农村合作医疗保障救助基金制度,规范农村合作医疗保障救助基金的使用办法以及申请和批准程序。省财政继续安排资金扶持东西两翼和粤北山区建立农村合作医疗保障救助基金,市、县级财政也要安排一定资金作为农村合作医疗保障救助基金,并列入财政的年度预算。同时,要广泛发动社会力量捐赠,拓宽农村合作医疗保障救助基金的筹集渠道。	0	0	0	0	0	0	0	0	0	0	0	1	1	0
辽宁省人民政府办公厅关于印发辽宁省城乡居民大病保险实施方案的通知	五、抓好组织实施 人力资源社会保障、卫生计生等部门要加强对医疗机构、医疗服务行为和质量的监管,要通过建立分级诊疗制度,引导常见病、多发病患者首先到基层医疗卫生机构就诊,完善双向转诊程序,合理配置医疗资源,促进基本医疗卫生服务均等化;要建立以保障水平、参保人满意度以及大病保险资金使用效率为核心的考核评价指标体系,加强监督检查和考核评估,督促商业保险机构按合同要求提高服务质量和水平。保险监管部门要加强商业保险机构从业资格审查以及偿付能力、服务质量和市场行为监管,依法查处违法违规行为。财政部门要会同相关部门落实利用城乡居民基本医保基金向商业保险机构购买大病保险的财务列支和会计核算办法,强化基金管理。审计部门要按规定进行严格审计。政府相关部门和商业保险机构要切实加强参保人员个人信息安全保障,防止信息外泄和滥用。	0	0	0	0	1	0	1	0	0	0	0	0	0	0
吉林省人民政府办公厅关于印发吉林省支持社会力量提供多层次多样化医疗服务实施方案的通知	六、加大政策支持 (十五)加强财税和投融资支持。支持和鼓励社会办医疗机构以股权融资、项目融资等方式筹集发展资金,支持符合条件的社会办医疗机构上市融资或发行债券,利用多层次资本市场融资。鼓励各类资本以信托投资、保险资管产品等形式支持社会办医疗机构融资。鼓励金融机构根据社会办医疗机构特点创新金融产品和服务方式,加快探索社会办医疗机构以其收益权、知识产权等无形资产作为质押开展融资活动。拓宽信贷抵押担保范围,探索允许社会办医疗机构利用有偿取得的用于非医疗用途的土地使用权和产权明晰的房产等固定资产办理抵押贷款。全面落实国家社会办医疗机构各项税收优惠政策。(省发展改革委、省金融办、省财政厅、省国税局、吉林证监局、吉林保监局、吉林银监局、省地税局分别负责)	0	0	0	0	0	0	0	1	0	0	0	1	0	0
内蒙古自治区人民政府办公厅关于印发《内蒙古自治区本级职工基本医疗保险管理办法》等五个办法的通知[附：内蒙古自治区本级职工大额医疗保险管理办法、内蒙古自治区本级职工基本医疗保险费用结算办法、内蒙古自治区本级职工基本医疗保险转诊转院和特殊医疗项目检查及治疗管理办法、内蒙古自治区本级职工基本医疗保险个人账户及社会保障卡管理办法]	第二章基本医疗保险基金的筹集 第十二条参保人员因工作调动、死亡以及与用人单位终止劳动关系,应缴清其应缴纳的医疗保险费用,并在30日内到医保局办理转换、保管、注销等手续。如不按时办理所发生的医疗费用全部由原单位承担。	0	0	0	0	0	0	1	0	0	0	0	0	0	0
青海省人力资源和社会保障厅关于印发青海省加快推进医疗保险支付方式改革实施方案的通知	六、工作要求 (二)强化沟通协调。各地人力资源社会保障、发展改革、财政、卫生计生、价格等部门要加强沟通协调,广泛听取社会各方面的意见建议,结合实际研究制定支付方式改革的政策措施和工作方案。各地改革的政策措施和工作方案须报省人力资源社会保障厅备案,改革进展情况按季度上报。省人力资源社会保障厅适时专题分析研究出现的新情况、新问题,及时解决有关难点和重点问题。	0	0	0	0	1	0	0	0	0	0	0	0	0	0
山西省人民政府关于印发山西省“十二五”期间深化医药卫生体制改革规划暨实施方案的通知	三、重点任务 (一)加快健全全民医保体系。 4.提高医保管理服务水平。加快推进基本医保和医疗救助即时结算。建立异地就医结算机制。做好城乡医保与医疗救助“一站式”结算。完善医保关系转移接续政策,基本实现职工医保制度内跨区域转移接续,推进各项基本医疗保险制度之间衔接。加强基本医保基金收支管理,居民医保当年结余控制在9个月支付水平以内,累计结余控制在12个月支付水平以内;新农合基金当年结余率控制在15%以内,累计结余控制在25%左右。完善基本医保基金管理监督和风险防范机制,防止基本医保基金透支,保障基金安全。稳步推进基本医保省级统筹。	0	0	0	0	1	0	0	0	0	0	0	0	0	0
吉林省人民政府办公厅印发关于完善省直离休干部医疗费管理意见的通知	吉林省人民政府办公厅印发关于 完善省直离休干部医疗费管理意见的通知 (吉政办发[200316号) 省政府各厅委、各直属机构: 现将《关于完善省直离休干部医疗费管理的意见》印发给你们,请认真贯彻执行。 吉林省人民政府办公厅 二00三年四月八日 关于完善省直离休干部医疗费管理的意见 一年多来,按照吉林省人民政府办公厅《关于印发<吉林省省直离休干部医疗费管理办法(试行)>的通知》(吉政办发[200156号)要求,省直有关部门认真加强医疗费管理,切实保障省直离休干部医疗待遇,各定点医院和定点药店不断提高医疗服务水平和服务质量,离休干部可以有选择地在29家定点医院和7家定点药店就医购药,参加离休干部医疗费统筹的各单位和离休干部比较满意,基本做到了方便就医,因病施治,合理用药,按规定实报实销。但离休干部医疗保障也存在一些问题,主要是医疗服务水平和服务质量还有待进一步提高,个别定点医院管理偏松、医疗费…	0	0	0	0	0	0	0	0	0	0	0	0	0	1
内蒙古自治区人民政府办公厅关于印发自治区深化医药卫生体制改革2016年重点工作任务的通知	四、健全药品供应保障机制 (一)巩固完善基本药物制度。加大监督力度,落实基本药物在各级医疗卫生机构的配备使用政策。加强基本药物临床应用和处方集培训,加大对贫困地区药事服务帮扶力度。推进仿制药质量和疗效一致性评价,做好基本药物全品种抽验工作。继续加强对国家基本药物品种的不良反应监测,及时向社会发布药品安全性信息。开展多种形式的监督检查,对基本药物生产、经营过程中存在的违法违规行为,予以立案查处。(自治区卫生计生委、财政厅、发展改革委、科技厅、经济和信息化委、食品药品监管局分别负责)	0	0	0	0	0	0	1	0	0	0	0	0	0	0
山东省人民政府办公厅关于贯彻国办发〔2015〕13号文件进一步加强乡村医生队伍建设的实施意见	七、保障措施 (二)落实资金投入。县级政府应承担落实资金投入的主体责任,建立以政府为主导的多渠道投入机制,并结合当地实际制定和完善政府补助政策,统筹安排各级政府相关支持资金,将乡村医生队伍建设相关费用纳入财政预算,根据项目实际进展和绩效考核结果及时拨付,确保专款专用,任何部门不得截留、挪用。	0	1	0	0	0	0	0	1	0	0	0	0	1	0
广西壮族自治区人民政府办公厅关于印发广西促进养老托育服务健康发展三年行动方案（2021—2023年）的通知	三、主要任务 (三)提升养老托育服务质量。 2.提高人才要素供给能力。通过自治区、市、县三级联动,充分利用现有各类职业技能培训机构和公共实训基地,加强失能失智人员照护、老年人照护、婴幼儿照护、康复护理服务、饮食起居照料、生活家务料理、意外伤害预防与处理等方面的岗位技能培训,不断提高养老护理员、家政服务员、育婴员、保育员等养老托育服务从业人员职业素质和服务能力,培养初、中、高级梯次分明的技能人才队伍。鼓励全区高等院校和职业院校(含技工院校)设置养老托育服务相关学科专业,结合行业发展动态优化专业设置,完善教学标准,加大培养力度。引进专业人才,组建专家库,促进行业人才交流。到;00年,全区累计培训养老护理员6万人次以上,培训托育从业人员4万人次以上;养老、托育服务机构从业人员接受专业培训率90%以上;全区高等院校和职业院校(含技工院校)的老年医学、老年护理、社会工作、婴幼儿发展与健康管理、婴幼…	0	0	1	0	0	1	0	0	0	0	0	0	0	0
天津市人民政府办公厅关于印发天津市支持社会力量提供多层次多样化医疗服务实施方案的通知	二、拓展多层次多样化服务 (六)全面发展中医药服务。鼓励社会力量充分发挥中医药独特优势,全面提供中医医疗、养生保健、康复、养老、健康旅游等服务。支持有实力的社会办中医诊所等基层机构实行跨区域连锁经营、规模发展。鼓励各区依据自身基础相对集中设置中医门诊部和中医诊所,打造中医药一条街、中医药综合服务楼等中医药集中服务区域,发挥中医治未病优势,提供预防、治疗、疗养、护理、康复等多元化服务。落实《天津市加快推进中医药健康服务发展实施方案(2016-;00年)》,将中医药健康服务融入医疗、养老、旅游、文化、服务贸易等领域。(责任部门:市卫生计生委、市中医药管理局、市商务委、市民政局、市旅游局)	0	0	0	0	0	0	0	0	0	0	0	1	0	0
内蒙古自治区人民政府办公厅关于印发自治区2016年度大气污染防治实施计划的通知	三、保障措施 (四)严格考核奖惩 1.;00年年底290乌兰察布市丰镇市丰镇森林公安居民供暖1110取缔00.00.1	0	0	0	0	0	0	0	0	0	0	0	0	0	1
西藏自治区人民政府关于进一步扶持和促进藏医药事业发展的意见	一、充分认识扶持和促进藏医药事业发展的重要性和必要性 (四)藏医药事业发展面临难得机遇和严峻挑战。中央第五次西藏工作座谈会站在新的历史起点上,对推进西藏实现跨越式发展和长治久安作出了战略部署,明确提出要培育具有地方特色和比较优势的战略支撑产业,促进资源优势转化为经济优势;要加快发展医疗卫生事业,完善藏药标准体系和检验监测体系,积极推进藏药产业化。《国务院关于扶持和促进中医药事业发展的若干意见》,对推动新时期藏医药事业发展提供了政策指导。由于种种原因,我区藏医药事业和藏药产业经过多年的发展,仍然面临着服务面窄、人才短缺、研发不足、技术落后、产业规模小等问题。自治区各级政府及其有关部门要以全面贯彻落实中央第五次西藏工作座谈会精神为契机,从夯实基础、落实政策、深化改革等方面入手,着力推动藏医药事业的新发展。	0	0	0	0	0	1	0	0	0	0	0	0	0	0
辽宁省人民政府办公厅关于印发《政府办基层医疗卫生机构基本药物集中采购实施办法(试行)》的通知	第三章集中采购 第十七条建立严格的诚信记录和市场清退制度。药品生产经营企业有下列行为之一的,记录在案并按以下规定进行处理:一次违规处以警告,并责令限期纠正或整改;逾期不改或再次违规的,由省级卫生行政部门将违法违规企业和法人代表名单及违法违规情况向社会公布,并报国家有关部门,该企业及其法人代表(包括其他省级卫生行政部门公布的违法违规企业及其法人代表);00年内不得参与我省任何药品的招标采购。违反有关法律法规规章的,依法予以处罚。 (五)未按合同规定及时配送供货的;	0	0	0	0	0	0	1	0	0	0	0	0	0	0
广东省人民政府办公厅关于加快推进深化医药卫生体制改革政策落实的通知	二、全面推动县级以下医疗卫生服务能力建设。各有关市、县(市、区)政府是县级以下医疗卫生服务能力建设项目的责任主体,要进一步强化责任担当,制定具体的建设方案和施工计划,加快推进实施。升级建设的47家中心卫生院要尽快形成服务能力。191家县级公立医院升级项目中,28家进入设备配置阶段的要在;00年6月底前全部完成设备配置任务;163家基建工程任务尚未完成的项目要严格按照时间节点推进工程建设,力争在;00年底前基本完成主体基建工程,其中15家装修类项目要在;00年10月底前全部完工。省卫生健康委要继续加强督导督办,及时协调解决项目建设中出现的问题,对推进项目不力、未能按时完成建设任务的市、县(市、区)政府,及时提请省政府进行通报问责。	0	0	0	1	0	1	0	0	0	0	0	0	0	0
内蒙古自治区人民政府办公厅关于印发自治区2016年度大气污染防治实施计划的通知	三、保障措施 (四)严格考核奖惩 9.;00年12月底720呼和浩特市新城区呼和浩特市金和园物业服务有限公司锅炉房QXW00生活供热62154拆并/改气00.63261	0	0	0	0	0	0	0	0	0	0	0	0	0	1
甘肃省人民政府办公厅关于2013年上半年省政府环保目标责任书落实情况及污染减排工作进展情况的通报	四、下一步工作要求 (二)严格环境执法监管力度。各市州要加强对减排设施运行的监管,重点做好已建成和在建的城镇污水处理工程、燃煤电厂、钢铁、水泥、有色、造纸等重点企业在线监控设施验收、有效性审核和数据联网等工作,确保在线监控传输数据的准确性,为污染减排核查提供准确依据。要进一步加强核辐射安全监管,严格环境执法,督促核技术利用单位落实辐射安全防护措施,提高监测和应急能力。	0	0	0	1	0	0	0	0	0	0	0	0	0	0
贵州省人民政府关于批转贵州省主要污染物总量减排统计监测及考核办法的通知	第九条各级人民政府要保证承担本辖区内污染源监测工作的各级环境监测站的相关工作条件,配备和充实相关学历的专业技术人员,保证在职人员的继续教育和短期专业技术提高培训、设备能力建设的购置补充和更新、工作和实验用房、交通工具的供给、工作必须的经费保障等方面制定切实可行的计划并予以落实,特别要切实保证直接为污染减排统计、监测和考核服务的污染源监督性监测工作费用,补助国控和省控重点污染源自动监控系统的建设和运行费用,将其纳入各级人民政府的财政预算。承担监测任务的各级环境监测机构监测方法必须采用国家标准方法或环保行业标准方法,并按照国家和地方技术规范要求实行质量保证和质量控制,做好数据的整理统计和上报工作。	0	0	0	0	0	0	1	0	0	0	0	0	0	0
福建省人民政府办公厅关于印发福建省第一次全国污染源普查方案的通知	四、普查组织及实施 (二)组织机构 2.制定和组织实施全省污染源普查各阶段工作方案;	0	0	0	0	1	0	0	0	0	0	0	0	0	0
天津市人民政府关于印发天津市"十二五"期间深化医药卫生体制改革规划暨实施方案的通知	三、进一步健全全民医保体系 (一)巩固扩大基本医保覆盖面。继续巩固全民医保发展成果,职工和居民基本医疗保险参保率稳定在95%以上。重点做好农民工、非公有制经济组织从业人员、灵活就业人员、个体工商户参保工作。	0	0	0	0	0	0	0	1	0	0	0	0	0	0
陕西省人民政府办公厅关于印发陕西省医药监督管理局职能配置内设机构和人员编制规定的通知	四、人员编制 省药品监督管理局机关行政编制38名。局领导职数3名,其中:局长1名,副局长2名。总药剂师1名(副局级)。处级领导职数13名(含机关党委专职副书记)。	0	0	0	0	0	0	0	0	0	0	0	0	0	1
内蒙古自治区人民政府办公厅关于印发2016年度水污染防治计划的通知	三、重点任务 (七)全力保障水生态环境安全。 4.配合环境保护部完成《重点流域水污染防治“十三五”规划》编制工作。各盟市要以水环境问题为导向,识别水质超标、生态敏感、风险突出的控制单元作为优先单元,筛选工程项目,编制优先控制单元污染防治方案。着力消除重污染水域。到;00年底,通过采取控源截污、垃圾清理、清淤疏浚、生态修复等综合治理措施,消除总排干入黄口断面等劣五类断面。(自治区环保厅牵头,自治区发展改革委、经济和信息化委、财政厅、住房城乡建设厅、水利厅等部门参与)	0	0	0	0	1	1	0	0	0	0	0	0	0	0
吉林省人民政府办公厅关于印发吉林省深化医药卫生体制改革2012年主要工作安排的通知	二、工作任务 (五)着力推进公共卫生六大体系建设。 3.推进传染病防治体系建设。进一步提升传染病监测、检测防治能力。加强免疫规划,实施安全规范接种。(省卫生厅、发展改革委、财政厅负责)	0	0	0	0	1	0	0	0	0	0	0	0	0	0
内蒙古自治区人民政府办公厅关于印发自治区支持社会力量提供多层次多样化医疗服务实施方案的通知	二、主要任务 (二)进一步扩大市场开放。 8.放宽市场准入。落实医疗卫生服务体系规划、医疗机构设置规划、大型医用设备配置规划,完善规划调控方式,优化配置医疗资源,促进社会办医加快发展。对符合规划条件和准入资质的,不得以任何理由限制。个体诊所设置不受规划布局限制;对社会办医疗机构配置大型医用设备合理放宽规划预留空间。在审批专科医院等医疗机构设置时,将审核重点放在人员资质与技术服务能力上。积极落实国家眼科等医疗机构基本标准和新型机构标准,满足群众健康需求和社会办医发展需要。(自治区卫生计生委负责)	0	0	0	0	0	0	0	0	0	0	0	1	0	0
医疗纠纷预防和处理条例	第二章医疗纠纷预防 第九条 医疗机构及其医务人员在诊疗活动中应当以患者为中心,加强人文关怀,严格遵守医疗卫生法律、法规、规章和诊疗相关规范、常规,恪守职业道德。 医疗机构应当对其医务人员进行医疗卫生法律、法规、规章和诊疗相关规范、常规的培训,并加强职业道德教育。	0	0	0	0	0	0	1	0	0	0	0	0	0	0
福建省人民政府办公厅关于印发2005年度全省治理“餐桌污染”建设“食品放心工程”工作方案的通知	四、治理饮用水污染 (二十二)由省水利厅负责继续协调有关部门实施《福建省村村通水工程建设规划》,推进“千万农民饮水工程”建设,建成村级供水工程1500个。	0	0	0	1	0	1	0	0	0	0	0	0	0	0
广西壮族自治区人民政府办公厅关于印发广西促进“互联网+医疗健康”发展实施方案的通知	一、健全“互联网+医疗健康”服务体系 (二)发展“互联网+”公共卫生服务。 2.充分利用居民电子健康档案、电子病历、膳食消费、环境因素、流行病学因素、虫媒监测等数据,开展大数据分析。加强对各种传染病、慢性病、肿瘤、心脑血管等疾病的智能监测和精准预测,提高重大疾病防控和突发公共卫生事件应对能力。(责任单位:自治区卫生计生委)	1	0	0	0	0	0	0	0	0	0	0	0	0	0
福建省人民政府办公厅关于印发2005年度全省治理“餐桌污染”建设“食品放心工程”工作方案的通知	八、其他有关分工 (五十八)由省食品药品监管局负责构建食品安全信息平台,组织起草《福建省食品安全信息管理办法》,规范和统一食品安全信息的汇集和发布。开展奶制品和蔬菜两个品种规范信息发布试点工作。	1	0	0	0	0	0	0	0	0	0	1	0	0	0
浙江省人民政府办公厅转发省劳动保障厅、省财政厅关于浙江省国家公务员医疗补助实施意见的通知	五、医疗补助经费管理和监督 医疗补助经费要专款专用、单独建账、单独管理,与基本医疗保险基金分开核算。医疗补助经费当年有结余的,应当结转下一年度使用。 医疗保险经办机构负责医疗补助的经办工作,要严格执行有关规章制度并建立健全国家公务员医疗补助经费的各项内部管理制度和审计制度。医疗补助的经办工作要与基本医疗保险制度相衔接,方便国家公务员就诊就医。 劳动保障部门要加强对医疗保险经办机构的指导与监督管理;财政部门要制定医疗补助经费的财务、会计管理制度,加强财政专户管理,及时监督检查补助经费的分配和使用;审计部门要加强对医疗补助经费的审计工作。	0	0	0	0	0	0	1	0	0	0	0	0	0	0
海南省人民政府办公厅关于印发海南省污染水体治理三年行动方案的通知	四、保障措施 (二)加强行业监管,落实部门责任。 省政府相关职能部门要按照部门职责,负责做好部门职责范围内的生态环境保护工作。各部门要按照职责分工针对相关牵头工作事项,分解到本部门的年度工作计划中部署落实,并加强对市县政府工作的督促指导,确保各项工作得到有效落实。各部门要加强沟通,密切配合,共享信息,定期向领导小组办公室报送工作进度,形成政府主导、部门联动、全社会共同参与的水污染治理工作格局。	0	0	0	0	1	0	0	0	0	0	0	0	0	0
陕西省人民政府办公厅关于印发省主要污染物排污权有偿使用和交易试点实施方案的通知	四、试点范围、对象及交易模式 (二)试点主要污染物。试点种类为“十二五”国家控制的二氧化硫、化学需氧量、氮氧化物和氨氮污染物4项约束性指标。以二氧化硫作为首批交易试点,逐步开展化学需氧量、氮氧化物和氨氮污染物的交易。	0	0	0	0	0	0	0	0	0	0	1	0	0	0
河南省人民政府办公厅关于印发河南省推进工业结构调整打赢污染防治攻坚战工作方案的通知	六、加强工业资源综合利用 (一)推进固体废物处理处置及综合利用。 2.主要任务: (1)开展大宗工业固体废物资源化利用,在濮阳市、平顶山市宝丰县、南阳市镇平县开展静脉产业园试点。 (2)建设一批工业资源综合利用基地,大力推进煤矸石、尾矿、冶炼渣、粉煤灰、炉渣、工业副产石膏、赤泥、化工废渣等工业固体废物综合利用。对不能资源综合利用的,要强化固体废物环境污染防治,严格落实“三防”(防扬散、防流失、防渗漏)措施,防止对大气、水体、土壤环境造成污染。属于危险废物的,应交由具有相应处置资质的危险废物经营单位进行处置利用,切实保障环境安全。 (3)发布再生资源综合利用规范企业名单,大力推进新能源汽车动力蓄电池回收利用和铅酸蓄电池回收处置工作,推进水泥窑协同处置城市生活垃圾和工业固体废弃物示范试点工作。指导开展工业固体废物资源综合利用评价,落实综合利用税收优惠政策。	0	0	0	1	0	0	0	1	0	0	1	0	0	0
吉林省人民政府关于加快推进医药健康支柱产业发展的实施意见	二、重点推进工作 (四)发展壮大生物健康材料、保健食品与用品产业。立足长白山资源优势和制药基础,以市场需求为导向,加快培育生物健康材料,发展壮大保健食品产业,形成特色板块和新的经济增长点。到;00年,生物健康材料、保健食品与用品产业实现销售产值200亿元。 4.营养素补充剂和生物技术保健食品开发。依托制药和科研优势,开发氨基酸、微量元素等营养素补充剂,以及活性肽、胶原蛋白等生物技术保健食品。	0	0	0	0	0	0	0	0	1	0	0	1	0	0
国务院关于印发“十二五”期间深化医药卫生体制改革规划暨实施方案的通知	四、巩固完善基本药物制度和基层医疗卫生机构运行新机制 (八)加快推进基层医疗卫生机构信息化。 在试点基础上,以省为单位,建立涵盖基本药物供应使用、居民健康管理、基本医疗服务、绩效考核等功能的基层医疗卫生信息系统,提高基层医疗卫生服务水平。到;00年,基层医疗卫生信息系统基本覆盖乡镇卫生院、社区卫生服务机构和有条件的村卫生室。	1	0	0	0	0	1	0	0	0	0	0	0	0	0
青海省人民政府办公厅关于印发青海省医疗卫生服务体系规划(2016—2020年)的通知	医疗卫生服务体系建设要根据群众健康需求,合理确定各类医疗卫生资源的配置目标。充分征求有关部门和社会各界的意见,并与当地经济社会发展规划、城乡规划、土地利用总体规划、国防卫生动员需求等进行有效衔接,合理控制资源总量标准及公立医院单体规模,各地可以在强基层的基础上,根据实际需要对不同级别、类型机构床位的比例关系进行适当调整。各市(州)区域卫生规划起草和论证完成后,须经省卫生计生行政部门同意并报本级人民政府审批,确保规划的可行性、可操作性和权威性。 及时发布机构设置和规划布局调整等信息,将纳入规划作为建设项目立项的前提条件。所有新增医疗卫生资源,特别是公立医院的设置和改扩建、病床规模的扩大、大型医用设备的购置,无论何种资金渠道,必须按照要求和程序,严格管理。建立公立医院床位规模分级审核备案和公示制度,新增床位后达到或超过1500张床以上公立医院,其床位增加报国家卫生计生委备案(中医类医院同时报…	0	0	0	1	0	0	0	0	0	0	0	0	0	0
山西省人民政府关于印发山西省土壤污染防治工作方案的通知	二、主要任务 (三)实施农用地分类管理,保障农业生产环境安全。 2.切实加大保护力度。 (13)全省产粮(油)大县、蔬菜产业重点县、国家现代农业示范区和省级现代农业示范县,;00年底前由所在县(市、区)人民政府组织制定土壤环境保护方案,严格保护土壤环境质量,保障“米袋子”“菜篮子”质量安全。 牵头单位:省农业厅、省环保厅 参加单位:省发展改革委、省财政厅、省国土资源厅、省水利厅等	0	0	0	0	1	0	0	0	0	0	1	0	0	0
吉林省人民政府办公厅关于印发吉林省进一步加强乡村医生队伍建设实施方案的通知	八、完善配套政策,建立健全乡村医生养老和退出机制 (十六)完善乡村医生养老政策。分类解决我省乡村医生养老保险问题。对聘用到乡镇卫生院统一管理的在村卫生室执业的执业(助理)医师,按规定参加职工基本养老保险;对目前在村卫生室执业的乡村医生(持有《乡村医生执业证书》),可在户籍地参加城乡居民基本养老保险,待考取执业(助理)医师资格后,可与乡镇卫生院签订劳动合同并按规定参加职工基本养老保险;对年满60周岁的乡村医生,采取补助等多种形式,妥善解决生活保障困难问题,进一步提高养老待遇,具体办法另行制定。(牵头部门:省人力资源社会保障厅,配合部门:省财政厅、省卫生计生委)	0	0	1	0	0	0	0	0	0	0	0	0	1	0
山西省人民政府办公厅关于印发山西省大气污染防治2013年行动计划的通知	二、重点任务 (二)应启动的任务。 1.启动钢铁企业、水泥企业及燃煤锅炉除尘设施升级改造工作,将燃煤采暖锅炉除尘改造任务分解到各县(市、区),开展项目前期工作。(省环境保护厅)	0	0	0	0	1	1	0	0	0	0	0	0	0	0
国务院关于建立全科医生制度的指导意见	三、逐步建立统一规范的全科医生培养制度 (十三)改革临床医学(全科方向)专业学位研究生教育。 从;00年起,新招收的临床医学专业学位研究生(全科方向)要按照全科医生规范化培养的要求进行培养。要适应全科医生岗位需求,进一步加强临床医学研究生培养能力建设,逐步扩大全科方向的临床医学专业学位研究生招生规模。	0	0	1	0	0	0	0	0	0	0	0	0	0	0
河北省人民政府关于改革药品医疗器械审评审批制度的实施意见	二、主要任务 (五)及时发布审批相关信息。认真落实《河北省人民政府办公厅关于印发河北省工业领域推进创新驱动发展实施方案(2015-;00年)的通知》(冀政办字〔2015〕50号)精神,促进监管与创新、成果与产业的对接,严控低水平重复、生产工艺落后的仿制药生产和申报,鼓励市场短缺药品医疗器械的研发和生产。根据国家有关部委公布的限制类和鼓励类药品审批目录,及时向社会或申请人公开药品医疗器械审批清单、注册申请信息、审批进度和结果,接受社会监督。	0	0	0	0	1	0	0	0	0	0	0	0	0	0
山西省人民政府办公厅关于印发山西省深化医药卫生体制改革2014年重点工作任务的通知	重点解决筹资机制不健全、重特大疾病保障机制不完善、医疗服务监管尚需加强、支付方式改革有待深化等问题,进一步巩固完善全民医保体系。;00年三项基本医保参保(合)率稳定在95%以上,城镇居民医保和新农合人均政府补助标准达到320元;个人缴费同步新增20元。城镇居民医保和新农合政策范围内住院费用支付比例达到75%以上。适当提高城镇居民医保和新农合门诊统筹待遇水平。重点任务是:	0	0	0	0	0	0	0	0	0	0	0	0	1	0
天津市人民政府批转市环保局、市发展改革委拟定的天津市"十一五"主要污染物总量减排考核办法的通知	第三条"十一五"主要污染物总量减排的责任主体是各区县人民政府和有关责任部门。各区县人民政府和有关责任部门要把主要污染物排放总量控制指标分解落实到各相关责任单位和重点排污单位,并将其纳入经济社会发展"十一五"规划,加强组织领导,落实项目和资金,严格监督管理,确保实现主要污染物减排目标。	0	0	0	0	1	0	0	0	0	0	0	0	0	0
河南省人民政府办公厅关于加快发展商业健康保险的实施意见	一、总体要求 (二)基本原则。 --以人为本,保障供给。把提升人民群众健康素质和保障水平作为发展商业健康保险的根本出发点和落脚点,充分发挥商业健康保险在满足多样化健康保障和服务需求方面的作用,建设结构合理、高效运行的多层次医疗保障体系。 --政府引导,市场驱动。强化政府制度建设、政策规划和市场监管等职责,通过政策引导,发挥市场在资源配置中的决定性作用,促进商业保险机构不断增加健康保障供给,提高服务质量和效率。 --改革创新,协同发展。深化商业健康保险体制机制改革,运用现代科技,创新管理服务,拓宽服务领域,延长服务链条,推进健康保险同医疗服务、健康管理与促进等相关产业融合发展。	0	0	0	0	0	1	0	0	1	0	0	1	0	0
山西省人民政府办公厅关于印发山西省焦化行业压减过剩产能打好污染防治攻坚战行动方案的通知	三、重点任务 (二)全面清理整顿已备案焦化项目。 省工信厅负责指导各市全面清理整顿已备案焦化项目备案文件及产能置换确认手续,不合规文件予以撤销。各市压减过剩焦化产能工作方案报省政府审核通过前,暂停办理全省焦化项目备案及产能置换确认手续。焦化产能置换确认及焦化项目备案权限收归省级行业主管部门,淘汰压减产能与焦化升级改造项目建设合并审批。压减过剩产能行动过程中,列为压减对象的焦化产能禁止进行交易,也不得用于备案大型焦化项目。	0	0	0	0	0	0	1	0	0	0	0	0	0	0
国务院办公厅关于印发深化医药卫生体制改革2014年重点工作任务的通知	二、积极推动社会办医 (十一)加快推进医师多点执业。 出台推进医师多点执业的意见,进一步简化程序,推动医务人员保障社会化管理,消除阻碍医师有序流动的不合理规定,完善鼓励多点执业的政策措施。 (卫生计生委、人力资源社会保障部、发展改革委、中医药局负责)	0	0	1	0	0	0	0	0	0	0	0	0	0	0
河南省人民政府办公厅关于印发河南省推进工业结构调整打赢污染防治攻坚战工作方案的通知	一、总体要求 (一)指导思想。以习近平新时代中国特色社会主义思想为指导,深入贯彻党的十九大精神,认真落实全国生态环境保护大会和省委十届六次全会决策部署,立足能源原材料大省实际,牢固树立绿水青山就是金山银山发展理念,牢牢把握“绿色减量、创新提质”转型方向,推行更严更高的环保、能耗、安全、质量、技术等标准,着力压减过剩和低效产能,着力推进智能化、绿色化改造,着力发展先进制造,着力推进动能转换,加快形成高效、清洁、低碳、循环的绿色制造体系,实现经济发展同生态文明建设的统一。	0	0	0	0	0	1	0	0	0	0	0	0	0	0
山西省人民政府办公厅关于印发山西省大气污染防治2015年行动计划的通知	四、保障措施 (五)推进信息公开。 省环境保护厅继续做好每月公布11个设区市空气质量排名工作。各设区市要在当地主要媒体上及时发布空气质量监测信息。各级环境保护部门和企业要主动公开新建项目环境影响评价、企业污染物排放、治理设施运行情况等环境信息,接受公众监督。涉及群众利益的建设项目,应充分听取公众意见。建立重污染行业企业环境信息强制公开制度。	0	0	0	0	1	0	0	0	0	0	0	0	0	0
内蒙古自治区人民政府办公厅关于印发2016年度水污染防治计划的通知	四、组织保障 (一)明确责任主体。 各地区对本地区水污染防治工作负总责,要加强组织领导,明确任务目标,逐级分解落实,完善政策措施,建立长效机制,加大资金投入,系统推进水污染治理工作。各相关部门要落实责任分工,密切配合,形成合力,全力推进各项工作任务。各类排污单位要落实污染治理主体责任,加强环保设施建设和运行管理,开展自行监测,确保完成治污减排目标任务,落实环境风险防范等责任。(自治区环保厅牵头,自治区国资委参与)	0	0	0	0	1	0	0	0	0	0	0	0	0	0
山西省人民政府关于开展城镇居民基本医疗保险试点的实施意见	山西省人民政府关于开展城镇居民基本医疗保险试点的实施意见 (晋政发[200737号) 各市、县人民政府,省人民政府各委、厅,各直属机构,各大中型企业: 为了逐步建立覆盖城乡全体居民的医疗保障体系,根据《国务院关于开展城镇居民基本医疗保险试点的指导意见》(国发[200720号)精神,结合我省实际,制定如下实施意见:	0	0	0	0	0	0	0	0	0	0	0	0	0	1
河南省人民政府办公厅关于印发河南省国民营养计划实施方案(2018—2030年)的通知	四、加强组织实施 (一)强化组织领导。各级政府要结合本地实际,强化组织保障,细化工作措施,将国民营养计划实施情况纳入政府绩效考评内容,确保取得实效。各相关部门要密切协作,齐心协力,强化营养专业人才队伍能力建设,不断提升营养工作能力和水平。各级卫生健康部门要会同有关部门,按照职责分工,加强督查评估,确保各项工作任务落到实处。	0	0	1	0	1	0	0	0	0	0	0	0	0	0
重庆市人民政府办公厅关于进一步加强医疗保障基金监管严厉打击欺诈骗保行为的通知	二、严厉打击欺诈骗取医疗保障基金行为 (一)突出打击重点。各区县要针对不同监管对象多发、高发的违规行为特点,聚焦重点、分类打击、对应施策。 对定点医疗机构,要进一步按照其服务特点确定监管重点。对二级及以上公立医疗机构,重点查处分解收费、超标准收费、重复收费、套用项目收费、不合理诊疗等行为;对基层医疗机构,重点查处串换药品、诊疗项目、耗材和挂床住院等行为;对社会办医疗机构,重点查处诱导参保人住院,虚构医疗服务、伪造医疗文书票据、挂床住院、盗刷社保卡等行为。 对定点零售药店,重点查处聚敛盗刷社保卡、诱导参保人购买化妆品、生活用品等行为。 对参保人,重点查处伪造虚假票据报销、冒名就医、使用社保卡套现或套取药品、耗材倒买倒卖等行为。对医保经办机构(包括承办基本医保和大病保险的商保机构),要加强监督检查,重点查处内审制度不健全、基金稽核不全面、履约检查不到位、违规办理医保待遇、违规支付医保费用以及…	0	0	0	0	0	0	1	0	0	0	0	0	0	0
辽宁省人民政府关于印发辽宁省土壤污染防治工作方案的通知	二、工作目标 (一)总体目标。到;00年,全省土壤污染加重趋势得到初步遏制,土壤环境质量总体保持稳定,农用地和建设用地土壤环境安全得到基本保障,土壤环境风险得到基本管控。到;00年,全省土壤环境质量稳中向好,农用地和建设用地土壤环境安全得到有效保障,土壤环境风险得到全面管控。到本世纪中叶,土壤环境质量全面改善,生态系统实现良性循环。	0	0	0	0	0	1	0	0	0	0	0	0	0	0
海南省人民政府办公厅关于印发海南省区域统筹区城镇居民基本医疗保险实施办法的通知	第四章基本医疗保险待遇 第十四条霍乱、鼠疫等甲类传染病的医疗费用由统筹基金全额支付。卫生行政部门确认的暴发性、流行性传染病的医疗费用由人民政府拨专款解决。	0	0	0	0	0	0	1	1	0	0	0	0	0	0
海南省人民政府办公厅关于印发海南省区域统筹区城镇居民基本医疗保险实施办法的通知	第七章奖惩 第三十四条参保人有以下行为之一的,除向其追回统筹基金已支付的医疗费用外,视情节轻重,给予批评教育;涉嫌犯罪的,移交司法机关处理: (五)其他违反城镇居民基本医疗保险管理规定的。	0	0	0	0	0	0	1	0	0	0	0	0	0	0
海南省人民政府办公厅关于进一步完善政府办基层医疗卫生机构编制、人事和收入分配机制的指导意见	四、完善财政补偿和收入分配改革 (一)落实人员经费。 各市县要严格按照有关文件要求,编内人员基本工资由市县财政纳入当年预算统筹并全额安排。绩效工资由服务收入和财政补助共同负担。具体分担比例由市县政府根据本地基层医疗卫生机构收支运行情况和财力情况自行确定。加快探索和完善按服务数量或服务人口定额补偿的方式落实补助资金办法。 由于客观因素导致人员招聘不到位,基层医疗卫生机构实际在编在岗人数低于编制数90%的按编办核定编制数的90%核定工资总量,超出实际在编在岗人数的人员经费部分,由基层医疗卫生机构自主用于实际在岗人员经费支出。当实际在编在岗人数高于编制数90%时,按实际在编在岗人数核定工资总量。	0	0	0	0	0	0	0	0	0	0	0	0	1	0
江苏省政府办公厅关于印发江苏省“十三五”食品药品安全规划的通知	三、主要任务 (二)加强食品药品监管法规标准体系建设。 3.加强监管理论政策研究。围绕有效履行食品药品安全监管职能、推进食品安全城市创建、强化基本药物质量监管、完善药品供应保障体系、推动医药产业转型升级等重大问题,以软课题研究等为载体,从政策理论、法律法规、对策措施等不同层面加强战略性、前瞻性研究,为提高科学决策和科学监管水平提供智力支持。	0	0	0	0	0	0	1	0	0	0	0	0	0	0
贵州省人民政府办公厅转发省民政厅等单位关于进一步完善医疗救助制度全面开展重特大疾病医疗救助工作的实施意见的通知	一、完善医疗救助制度 (一)明确救助范围。城乡医疗救助实行属地管理,救助对象为具有当地常住户籍或具有居住证且在当地连续居住;00年以上的以下十类人员: 5.精准扶贫建档立卡贫困人口中的大病患者;	0	0	0	0	0	0	0	0	0	0	0	0	1	0
陕西省人民政府办公厅关于印发2010年度主要污染物总量减排实施方案的通知	二氧化硫新增排放量预测分为火电和非电两部分。火电行业二氧化硫新增00万吨;非电行业二氧化硫新增00万吨,合计新增00万吨。	0	0	0	0	0	1	0	0	0	0	0	0	0	0
内蒙古自治区人民政府办公厅关于印发水污染防治工作方案的通知	二、重点任务 (一)狠抓工业污染防治 1.取缔“十小”企业 开展全区装备水平低、环保设施差的小型工业企业排查工作,编制取缔“十小”企业年度计划。;00年底前,全部取缔不符合国家产业政策和环保要求的小型造纸、制革、印染、染料、炼焦、炼硫、炼砷、炼油、电镀、农药等严重污染水环境的“十小”生产项目。(自治区经济和信息化委、环保厅牵头,国土资源厅、能源局等参与,地方各级人民政府负责落实,以下均需地方各级人民政府落实,不再列出)	0	0	0	0	1	0	0	0	0	0	0	0	0	0
河南省人民政府关于印发河南省全民健身实施计划(2011—2015年)的通知	二、目标任务 (三)体育健身设施明显改善。全省各类体育场地达到5万个以上,人均体育场地面积达到00平方米以上。各省辖市和50%以上的县(市、区)建有“全民健身活动中心”。60%以上的街道(乡镇)、社区(行政村)建有便捷、实用的体育健身设施。有条件的公园、绿地、广场建有体育健身设施。在全省规划建设20个全民健身户外活动基地、20个“雪炭工程”、300所青少年体育俱乐部、200个城市社区体育俱乐部、1000条健身路径和10000个农民体育健身工程。改善各类公共体育设施的无障碍条件,各类体育设施的开放率和利用率有较大提高。形成各级各类体育设施布局合理、互为补充、覆盖面广、普惠性强的网络化格局。	0	0	0	1	0	1	0	0	0	0	0	0	0	0
内蒙古自治区人民政府办公厅关于印发自治区2016年度大气污染防治实施计划的通知	三、保障措施 (四)严格考核奖惩 9.;00年12月底802呼和浩特市玉泉区内蒙古监狱管理局服刑人员矫治办公室DZL00-00/95/70--AII生活供热41436拆并/改气00.08841	0	0	0	0	0	0	0	0	0	0	0	0	0	1
青海省人民政府办公厅关于印发青海省医疗卫生服务体系规划(2016—2020年)的通知	第一节完善医疗卫生服务体系功能 二、人才使用 实行公立医院人员总量控制,推行聘用制度和岗位管理制度,建立能进能出、能上能下的灵活用人机制。建立符合医疗行业特点的人事薪酬制度,实行绩效工资制,健全绩效考核体系,充分发挥卫生骨干人才的作用。研究制定稳定边远少数民族地区卫生人才的相关政策,着力缓解边远地区聘不到人,留不住人的现象。力争到;00年基本建立起卫生人力资源布局和结构合理,能够基本满足全省居民医疗卫生服务需求,可持续性发展的卫生人才培养和使用创新机制。	0	0	1	0	0	1	0	0	0	0	0	0	0	0
河北省人民政府办公厅印发关于支持医药产业发展若干措施的通知	一、加快创新研发和产业化 (三)支持医疗器械产业化。对获得创新医疗器械特别审查程序的医疗器械项目,择优列入省级科技计划的,按规定给予省级科技专项经费支持;对通过创新医疗器械特别审查程序,新获得三类医疗器械注册证且在省内落地的产业化项目,择优纳入省高技术产业化项目计划,给予不超过项目固定资产投资20%、最高不超过2000万元的省战略性新兴产业专项资金支持。推动医疗装备进入《河北省重点领域首台(套)重大技术装备产品公告目录》,符合条件的企业产品投保经中国银保监会备案的首台(套)重大技术装备综合保险,省级财政按不高于3%的费率上限及实际投保年度保费的80%给予补贴,时间按保险期限据实核算,不超过;00年。(责任单位:省科技厅、省发展改革委、省药品监管局、省财政厅、省工业和信息化厅)	0	1	0	0	0	0	0	0	1	0	0	0	1	0
青海省人民政府办公厅关于印发青海省公立医疗机构推行“先住院后结算”服务模式实施方案(试行)的通知	四、甲方须在乙方出院前1-2天内向乙方或乙方家属告知其住院期间个人应承担的大致数额,以备乙方筹款结账。	0	0	0	0	0	0	1	0	0	0	0	0	0	0
辽宁省人民政府关于印发辽宁省“十三五”期间深化医药卫生体制改革实施方案的通知	二、重点任务 (六)统筹推进相关领域改革。 2.创新卫生人才使用机制,完善岗位设置管理制度,推行公开招聘制度,实行全员聘用制度,实现人员分类管理。改善从业环境和薪酬待遇,促进医疗资源向基层和农村流动。继续实施全科医生特岗计划。对医疗卫生机构单独制定绩效工作总量核定办法,允许医疗卫生机构突破现行事业单位工资调控水平,允许医疗服务收入扣除成本并按规定提取各项基金后主要用于人员奖励。合理确定医疗卫生机构编外人员待遇,逐步实现同岗同薪同待遇。严禁给医务人员设定创收指标,医务人员薪酬不得与药品、耗材、检查、化验等业务收入挂钩。基层医疗卫生机构内部绩效分配可采取设立全科医生津贴等方式,向承担签约服务等临床一线任务的人员倾斜。落实艰苦边远地区津贴、乡镇工作补贴政策,绩效工资分配向基层倾斜。创新人才评价机制,改革完善以岗位职责要求为基础,以品德、能力、业绩为导向,符合卫生人才特点的科学化、社会化评价机制…	0	0	1	0	0	0	0	0	0	0	0	0	1	0
河南省人民政府办公厅关于印发河南省推进工业结构调整打赢污染防治攻坚战工作方案的通知	九、加强组织领导,强化政策保障 (一)夯实工作责任。各省辖市、省直管县(市)政府对本地推进工业结构调整打赢污染防治攻坚战工作负总责,要加强组织领导,结合本地实际,制定工业结构调整实施方案,落实任务举措。工业企业是实施工业结构调整的责任主体,要抢抓机遇、积极主动,严格依法依规实施绿色化转型。省工业和信息化厅、发展改革委、生态环境厅等省直有关部门要根据职责分工加强指导,完善相关政策措施。	0	0	0	0	1	0	0	0	0	0	0	0	0	0
吉林省人民政府办公厅关于印发吉林省深化医药卫生体制改革2012年主要工作安排的通知	二、工作任务 (四)统筹推进相关领域改革。 40.继续做好10类国家基本公共卫生服务项目,着力提高服务质量、居民知晓率和满意度。城乡居民健康档案规范化电子建档率达到60%以上,高血压、糖尿病患者规范化管理人数分别达到136万、38万。将排查发现的所有重性精神病患者纳入管理范围。加强国家免疫规划疫苗接种工作。提高流动人口以及农村留守儿童和老人公共卫生服务可及性。加强健康促进与教育,倡导健康的生活方式,引导科学就医和安全合理用药。(省卫生厅、财政厅、中医药局负责)	0	0	0	0	1	0	0	0	0	0	0	0	0	0
广东省人民政府关于印发“十二五”期间深化医药卫生体制改革实施方案的通知	三、巩固完善基本药物制度和基层医疗卫生机构运行新机制,继续加强基层服务网络建设 (四)规范基本药物采购机制。 1.坚持质量优先、价格合理,进一步完善基本药物质量评价标准和评标办法,既要降低虚高的药价也要避免低价恶性竞争,确保基本药物安全有效、供应及时。(由省卫生厅、物价局、食品药品监管局、经济和信息化委、人力资源社会保障厅负责)	0	0	0	0	1	0	1	0	0	0	0	1	0	0
内蒙古自治区人民政府办公厅关于印发自治区2016年度大气污染防治实施计划的通知	三、保障措施 (四)严格考核奖惩 9.;00年12月底692呼和浩特市新城区内蒙古榕达房地产开发有限责任公司锅炉房QXW00生活供热62154拆并/改气00.63261	0	0	0	0	0	0	0	0	0	0	0	0	0	1
福建省人民政府办公厅关于印发福建省第一次全国污染源普查方案的通知	按照全面普查、突出重点的原则,本次污染源普查的污染物种类为对环境影响较大、对污染防治具有普遍意义的污染物。具体是:	0	0	0	0	1	0	0	0	0	0	0	0	0	0
海南省人民政府办公厅关于印发海南省区域统筹区城镇居民基本医疗保险实施办法的通知	第七章奖惩 第三十三条定点医疗机构及其工作人员有下列行为之一的,视其情节轻重,按有关规定予以处理;涉嫌犯罪的,移交司法机关处理: (七)违反城镇居民基本医疗保险用药规定,开大处方、假处方的;	0	0	0	0	0	0	1	0	0	0	0	0	0	0
甘肃省人民政府办公厅关于2012年上半年省政府环保目标责任书落实情况及污染减排工作进展情况的通报	三、存在的主要问题 (一)污染减排形势依然严峻。 1.城镇污水处理工程建设依然滞后,不能充分发挥减排作用。责任书中要求今年建成并正常投运的新建或改扩建污水处理工程有30个。上半年,只有玉门市污水处理厂技改升级工程、成县污水处理厂灾后重建工程和环县污水处理工程等3个项目按期投运并通过了环保验收,加上;00年已建成的民勤县和黄羊镇污水处理工程外,其余25个项目还未达到年度减排目标要求,部分污水处理厂管网建设不完善,管理不规范,运行不正常,达不到环保验收条件;要求年内建成的9个城镇污水处理厂脱氮除磷改造工程均未建成,其中敦煌市和武都区等2个城镇污水处理厂脱氮除磷改造工程还未开工建设;要求年内开工建设的13个新建城镇污水处理工程中,榆中县夏官营污水处理厂配套管网工程及海石湾、窑街、古浪县、庄浪县、崇信县、镇原县、瓜州县、临夏县、东乡县污水处理工程等10个项目尚未开工;已建成的西峰污水处理厂及再生…	0	0	0	0	0	1	0	0	0	0	0	0	0	0
国务院关于印发“十二五”期间深化医药卫生体制改革规划暨实施方案的通知	七、建立强有力的实施保障机制 (一)强化责任制。 地方各级政府要把医药卫生体制改革作为一项全局性工作,加强对规划实施的组织领导,建立健全责任制和问责制,形成政府主要领导负总责,分管常务工作和卫生工作的领导具体抓,各有关部门分工协作、密切配合、合力推进的工作机制,确保规划顺利实施。各地区、各部门要围绕规划的总体目标和重点任务细化年度任务,制定工作方案,落实责任制,把规划的重点任务落到实处。建立规划实施动态监测、定期通报制度,开展规划实施评估。	0	0	0	0	1	0	0	0	0	0	0	0	0	0
内蒙古自治区人民政府办公厅关于印发自治区国民营养计划(2017—2030年)实施方案的通知	二、完善实施策略 (二)加强营养能力建设。 加强营养科研能力建设。加大营养科研研究力度,加快建立基于自治区实际的人群营养与相关疾病数据库。研究制定营养相关疾病的防控技术及策略。开展营养与健康、营养与社会发展的经济学研究。加强营养与健康科研机构建设,以自治区级营养专业机构为基础,积极争取建立自治区级营养专项重点实验室。加强营养健康基础研究、应用研究和转化医学研究,鼓励科研机构、高等院校和企业积极开展食品、营养与健康的各类研究,推动科技成果转化和适宜技术应用与推广。	1	0	0	0	0	0	0	0	0	0	0	0	0	0
青海省人民政府关于印发青海省城镇居民基本医疗保险试点工作指导意见的通知	四、试点的基本内容 (六)监督管理 3.实行基本医疗保险工作考核和评价制度。实行工作考核制度,由政府有关部门定期进行专项考核。建立基本医疗保险评价指标体系,对医疗保险目标的实现程度、医疗保险效益、工作效率进行定期评价,定期督导考核,科学评价,及时发现和解决问题,总结经验,完善政策措施,规范运行,不断巩固和发展居民医保制度。	0	0	0	0	0	0	1	0	0	0	0	0	0	0
西藏自治区人民政府办公厅关于进一步加强乡村医生队伍建设的实施意见	西藏自治区人民政府办公厅关于进一步加强乡村医生队伍建设的实施意见 (藏政办发〔2012〕14号) 各行署、拉萨市人民政府,自治区各委、办、厅、局: 为认真贯彻《国务院办公厅关于进一步加强乡村医生队伍建设的指导意见》(国办发〔2011〕31号),进一步加强我区乡村医生队伍建设,保障广大农牧区群众基本医疗和公共卫生服务的公平性和可及性,实现“保基本、强基层、建机制”的战略目标,经自治区人民政府同意,结合我区实际制定本实施意见。	0	0	0	0	0	0	0	0	0	0	0	0	0	1
海南省人民政府关于印发《海南自由贸易港博鳌乐城国际医疗旅游先行区临床急需进口医疗器械管理规定》的通知	第六条省药品监督管理部门对申报资料组织评估,决定是否准予进口,将结果告知申请医疗机构,并将相关信息按季度报送国家药品监督管理部门。	0	0	0	0	0	0	1	0	0	0	0	0	0	0
山西省人民政府关于印发山西省土壤污染防治工作方案的通知	二、主要任务 (一)开展土壤污染调查,掌握土壤环境质量状况。 2.建设土壤环境质量监测网络。 (2)统一规划、整合优化现有监测站点和点位,建立土壤环境质量监测网络,充分发挥环保、农业、国土资源行业监测机构作用,按照统一的标准规范开展监测和评价,并建立数据集成共享机制,实现数据互补互联共享,客观、准确反映土壤环境质量及环境风险。;00年底前,完成土壤环境质量国控监测点位设置。根据我省产业分布情况,补充具体加密监测点位,并根据实际工作需要,针对土壤中生物富集性或对人体健康危害大的污染物,机动增加监测项目,提高监测频次。;00年底前,实现土壤环境质量监测点位所有 县(市、区)全覆盖。 牵头单位:省环保厅 参加单位:省财政厅、省国土资源厅、省农业厅等	0	0	0	0	0	1	0	0	0	0	0	0	0	0
湖北省人民政府关于表彰2009年度全省污染减排和环保专项治理工作先进集体和先进个人的通报	三、合格单位 荆州市人民政府十堰市人民政府黄冈市人民政府 恩施自治州人民政府仙桃市人民政府天门市人民政府 神农架林区人民政府 ;00年度主要污染物总量减排工作 突出贡献单位名单 省委办公厅省人大城环委省政府办公厅 省政协人资环委省委宣传部省发改委 省经信委省监察厅省财政厅 省环保厅省住建厅省统计局 省物价局华中电监局省电力公司 ;00年度湖北省环境保护专项治理工作 先进集体名单 武汉市人民政府黄石市人民政府襄樊市人民政府 荆州市人民政府鄂州市人民政府黄冈市人民政府 随州市人民政府恩施自治州人民政府仙桃市人民政府 神农架林区人民政府省政府办公厅省发改委 省经信委省监察厅省财政厅 省环保厅省住建厅 ;00年度湖北省污染减排工作 先进个人名单 省直部门 白富平易发明陈国良成文心程保国严宓党军强 常华诚廖天李新龙王广耀刘宏伍旭李柏林 李琴谢松文徐晶华王玉珏彭良斌肖本绪马育锋 魏娜张富安刘正中付春…	0	0	0	0	0	0	0	0	0	0	0	0	0	1
医疗纠纷预防和处理条例	第三章医疗纠纷处理 第四十二条 医疗纠纷人民调解委员会及其人民调解员、卫生主管部门及其工作人员应当对医患双方的个人隐私等事项予以保密。 未经医患双方同意,医疗纠纷人民调解委员会、卫生主管部门不得公开进行调解,也不得公开调解协议的内容。	0	0	0	0	0	0	1	0	0	0	0	0	0	0
内蒙古自治区人民政府办公厅关于印发自治区2016年度大气污染防治实施计划的通知	三、保障措施 (四)严格考核奖惩 5.;00年年底406乌兰察布市集宁区中铁十九局集团第五工程有限公司集宁制梁厂生产供热4450拆改00.355	0	0	0	0	0	0	0	0	0	0	0	0	0	1
吉林省人民政府办公厅关于加快发展健身休闲产业的实施意见	四、组织实施 (三)加强人才队伍建设。加强健身休闲产业管理、运营和服务人才培养,加大高端人才引进,探索“产学研用”一体化人才培养模式,高校要创造条件设置体育产业专业、健身休闲体育产业课程,依托高校培养健身休闲产业人才。加强健身休闲人才培育的国际交流和合作,积极引进国际先进运营管理团队。	0	0	1	0	0	0	0	0	0	0	0	1	0	0
山东省人民政府关于印发《山东省建立城镇职工基本医疗保险制度实施方案》的通知	七、加强医疗服务管理 省劳动和社会保障厅会同省卫生、财政、物价等有关部门,按照国家制定的基本医疗服务范围、标准,基本医疗保险药品目录、诊疗项目、诊疗服务设施标准,制定我省相应的实施标准以及定点医疗机构和定点药店的管理办法。 基本医疗保险实行定点医疗机构和定点药店管理。社会保险经办机构要严格按照国家和省制定的定点医疗机构和定点药店资格审定办法,按照中西医并举,基层、专科和综合医疗机构兼顾,方便职工就医的原则,负责确定定点医疗机构和定点药店,要同定点医疗机构和定点药店签定的有关基本医疗服务范围、项目、费用结算等内容的合同,明确各自的责任、权利和义务。在确定定点医疗机构和定点药店时,要引进竞争机制,职工可到用人单位选择的定点医疗机构就医、购药,也可持处方在定点药店购药。定点医疗机构和定点药店要规范医药行为,提供优质服务,保证医疗服务和药品质量;要建立监督检查和考核制度,对违反国家规定和合同内容…	0	0	0	0	1	0	1	0	0	0	0	1	0	0
江苏省残疾预防和残疾人康复实施办法	第二章残疾预防 第十八条农业农村、市场监督管理等部门应当加大对农产品和食品中致病性微生物、农药兽药残留、污染物质以及其他危害人体健康物质的检测和监管力度,有效防范、妥善应对农产品、食品安全事件。 承担药品监督管理的部门应当依法查处制售假冒伪劣药品行为,加强疫苗质量、药品不良反应监测和报告的监督管理。	0	0	0	0	0	0	1	0	0	0	0	0	0	0
上海市人民政府关于印发《上海市全民健身实施计划(2011－2015)》的通知	三、目标任务 (二)主要任务 3.组织网络体系更加健全。探索并逐步形成体育行政部门、全民健身指导中心、社区文化活动中心(站)、体育社会工作者、社会体育指导员等构成的全民健身组织网络体系。建立并推行社区体育社工服务制度。体育健身俱乐部或协会实现社区全覆盖。基层体育组织的数量不断扩大,社区健身团队达到15000支。	0	0	0	0	0	1	0	0	0	0	0	0	0	0
河南省人民政府办公厅关于健全重特大疾病医疗保险和救助制度的实施意见	四、夯实医疗救助托底保障功能 (三)合理确定基本救助水平。按救助对象家庭困难情况,分类设定年度救助起付标准(以下简称起付标准)、救助比例、年度最高救助限额。困难群众具有多重特殊身份属性的,按“就高不就低"的原则享受救助,不得重复救助。参加职工基本医疗保险的救助对象,参照以下标准执行。 1.住院救助。对特困人员、低保对象、返贫致贫人口,住院救助不设起付标准。低保边缘家庭成员、农村易返贫致贫人口的住院救助起付标准按所在统筹地区上一年度城乡居民人均可支配收入的10%左右确定,因病致贫重病患者的住院救助起付标准按所在统筹地区上一年度城乡居民人均可支配收入的25%左右确定。对在定点医疗机构发生的住院费用,经居民基本医保、大病保险支付后的政策范围内自付费用,给予特困人员不低于90%的救助,给予低保对象、返贫致贫人口不低于70%的救助,给予低保边缘家庭成员、农村易返贫致贫人口、因病致贫重病患者不低于6…	0	0	0	0	0	0	0	0	0	0	0	0	1	0
贵州省人民政府关于批转贵州省主要污染物总量减排统计监测及考核办法的通知	第二条本办法适用于对各市(州、地)人民政府(行署)“十一五”期间主要污染物总量减排完成情况的考核。 本办法所称主要污染物,是指《国民经济和社会发展第十一个五年规划纲要》确定的实施总量控制的两项污染物,即化学需氧量和二氧化硫。	0	0	0	0	0	0	1	0	0	0	0	0	0	0
青海省人民政府办公厅关于印发青海省2017年度水污染防治实施方案的通知	二、重点任务 (七)水生态环境安全保护。 8.全面开展排污口整治。;00年底前,全面规范整治排入河流、水库、湖泊、排水沟的工业、生活污水直排口。开展农灌退水口、泄洪口的综合整治,实施生态阻隔、污水净化、地表径流蓄积等设施建设,最大限度减少对水体的污染负荷。(省环境保护厅牵头,省水利厅、省发展改革委、省住房城乡建设厅参与,各相关市州政府落实。)	0	0	0	0	1	0	0	0	0	0	0	0	0	0
辽宁省人民政府关于印发辽宁省“十三五”期间深化医药卫生体制改革实施方案的通知	;00年,各级各类公立医院全面推开综合改革,初步建立决策、执行、监督相互协调、相互制衡、相互促进的管理体制和治理机制。到;00年,基本建立权责清晰、管理科学、治理完善、运行高效、监督有力的现代医院管理制度,建立维护公益性、调动积极性、保障可持续的运行新机制和科学合理的补偿机制。	0	0	0	0	1	1	0	0	0	0	0	0	0	0
山西省人民政府关于印发山西省土壤污染防治工作方案的通知	二、主要任务 (二)推进土壤污染防治地方立法,制定完善山西省地方标准规范。 1.加快推进地方立法。 (5)积极开展立法前期调研论证工作,研究制定土壤污染防治地方性法规。 牵头单位:省法制办、省环保厅 参加单位:省经信委、省国土资源厅、省住房城乡建设厅、省农业厅、省林业厅等	0	0	0	0	0	0	1	0	0	0	0	0	0	0
河北省人民政府办公厅关于印发河北省“十四五”医疗卫生服务体系规划的通知	七、打造特色鲜明的中医药服务体系 (五)强化中药产业支撑。提升中药材品质,引导重点品种种植,倡导中医药企业自建或以订单形式联建稳定的中药材生产基地。推进中药制造数字化,加强技术集成和工艺创新,提升中药装备制造水平,加速中药生产工艺、流程的标准化、现代化。 2.中医特色医疗机构建设项目:支持市级中医医院中医综合服务能力建设,推进邯郸、唐山、秦皇岛等市建设中医特色重点医院。建设一批标准化县级中医医院。到;00年,实现社区卫生服务中心和乡镇卫生院全部设置国医堂、配备中医医师。	0	0	0	1	0	1	0	0	0	0	0	0	0	0
吉林省人民政府办公厅关于印发吉林省医疗卫生服务体系规划(2015－2020年)的通知	第二章 目标原则和适用范围 第二节原则 四、坚持行业系统整合,提升医疗卫生服务水平 促进医疗卫生系统合作共享,加强全行业监管与属地化管理,统筹城乡、区域资源配置,统筹当前与长远,统筹预防、医疗和康复,坚持中西医并重,注重发挥医疗卫生服务体系的整体功能,提升基层医疗卫生能力建设,加强科研、人才等基础建设,扩大优质医疗卫生资源。	1	0	1	1	1	0	0	0	0	0	0	0	0	0
吉林省人民政府办公厅印发关于改革完善全科医生培养与使用激励机制实施方案的通知	四、具体措施 (四)全面支持全科医生职业发展。 9.增强全科医生职业荣誉感。鼓励各地按照党和国家有关规定,对长期扎根基层、作出突出贡献的全科医生给予表彰奖励,在享受国务院政府特殊津贴人员推选和“全国杰出专业技术人才”“全国先进工作者”“全国五一劳动奖章”以及省内有关评优评先活动等评选工作中,向基层全科医生倾斜,提升全科医生职业荣誉感和社会地位。鼓励各地组织开展全科技能竞赛等活动,对优秀全科医生给予适当奖励,提升综合技能和社会信任度。奖励要坚持精神奖励与物质奖励相结合,以政府奖励为导向,单位奖励为主体,社会奖励为补充。(牵头部门:省卫生计生委,配合单位:省委组织部、省人力资源社会保障厅、省中医药管理局、省总工会)	0	0	1	0	0	0	0	0	0	0	0	0	0	0
重庆市人民政府办公厅关于印发重庆市进一步深化基本医疗保险支付方式改革实施方案的通知	一、总体要求 (三)主要目标。 ;00年起,进一步加强医保基金预算管理,全面推行总额预算管理下以总额控制和按病种付费为主的多元复合式医保支付方式;贯彻落实100个单病种付费,加强单病种临床路径管理,合理制定并动态调整单病种医保支付标准;探索将日间手术、恶性肿瘤放化疗日间病房等纳入医保支付范围;选择部分医疗机构开展按疾病诊断相关分组(DRGs)付费试点;完善按人头、按床日等多种付费方式。到;00年,医保支付方式改革覆盖所有医疗机构及医疗服务,全市范围内普遍实施适应不同疾病、不同服务特点的多元复合式医保支付方式,按项目付费占比明显下降。	0	0	0	0	0	1	0	0	0	0	1	0	0	0
福建省人民政府办公厅关于印发2005年度全省治理“餐桌污染”建设“食品放心工程”工作方案的通知	八、其他有关分工 (五十六)由省委宣传部协调指导各新闻媒体和省联席会议成员单位,进一步加强治理“餐桌污染”、建设“食品放心工程”的舆论宣传工作。	0	0	0	0	1	0	0	0	0	0	0	0	0	0
青海省人民政府关于进一步加强药品安全监管工作的意见	二、主要任务 (一)强化药品监管制度体系建设。 4.健全药品安全监管体系。推动县级以上人民政府、监管部门依法履行职责,落实企业质量安全主体责任。坚持最严谨的标准,持续完善中藏药炮制规范、制剂注册和制剂室规范化建设等标准体系,不断推动中藏医药高质量发展。坚持预防为主、风险管理和全程控制的监管理念,加强风险防控体系建设,强化药品安全监管风险管控和隐患排查,实施全过程、全链条监管,织密药品质量安全网。坚持改革创新检查执法模式,加强药监法治体系建设,完善行政监督、行业自律、社会监督相结合的药品安全监管模式。(省卫生健康委、省市场监管局、省药品监管局,各市州政府按职责分工负责)	0	0	0	0	0	0	1	0	0	0	0	0	0	0
国务院办公厅关于印发深化医药卫生体制改革2014年重点工作任务的通知	五、规范药品流通秩序 (二十四)改革完善药品价格形成机制。 健全药品价格信息监测制度,推动建立药品零售价格、采购价格、医保支付标准信息共享机制,加强药品价格信息采集、分析和披露,引导形成药品合理价格。改进药品定价方法。完善进口药品、高值医用耗材的价格管理。 (发展改革委、人力资源社会保障部、卫生计生委负责)	0	0	0	0	0	0	1	0	0	0	0	0	0	0
陕西省人民政府办公厅关于印发陕西省医药监督管理局职能配置内设机构和人员编制规定的通知	一、职能调整 (一)省卫生厅移交给省药品监督管理局的药政、药检职能 3.审核、审批新药、进口药品;负责药品的再评价。不良反应监测职能。	0	0	0	0	1	0	0	0	0	0	0	0	0	0
山西省人民政府贯彻《国务院关于建立城镇职工基本医疗保险制度的决定》的实施意见	三、缴费办法 基本医疗保险费由用人单位和职工共同缴纳。用人单位缴费率控制在职工工资总额的6%左右,具体比例,各统筹地区要实际测算,合理确定。实际测算在6%以内的,按实测数确定;确需超过6%的,要从严控制,须报经省城镇职工医疗保险制度改革领导组批准。职工缴费率一般为本人工资收入的2%。随着经济发展,用人单位和职工缴费率可作相应调整。个体经济组织业主及其从业人员,缴费基数为统筹地区的职工平均工资。 所有用人单位和职工必须按时足额缴纳基本医疗保险费。用人单位缴费,党政机关和财政供给的社会团体、事业单位由财政部门统一拨付;其它事业单位和企业由开户银行按月代为扣缴。职工个人缴费,由用人单位从本人工资中按月代为扣缴。其他从业人员的基本医疗保险费,由统筹地区制定缴费办法。	0	0	0	0	0	0	1	0	0	0	0	0	0	0
河南省人民政府办公厅关于健全重特大疾病医疗保险和救助制度的实施意见	三、强化三重制度综合保障 (二)促进三重制度互补衔接。发挥基本医疗保险主体保障功能,各统筹地区参保人员享受同等的居民基本医保待遇;增强大病保险减负功能,在全面落实普惠待遇政策基础上,对特困人员、低保对象、返贫致贫人口实行大病保险起付线降低50%、支付比例提高5个百分点、取消年度最高支付限额等倾斜保障政策;夯实医疗救助托底保障功能,按照“先保险后救助"的原则,对基本医疗保险、大病保险支付后个人医疗费用负担仍然较重的救助对象按规定实施救助,合力防范因病致贫返贫风险。自;00年1月1日起,将困难群众大病补充医疗保险(以下简称大病补充保险)制度并入医疗救助制度;自;00年5月1日起,同步实施居民基本医保、大病保险、医疗救助待遇调整。	0	0	0	0	0	0	0	1	0	0	0	0	0	0
辽宁省人民政府关于印发辽宁省土壤污染防治工作方案的通知	三、重点任务 (五)强化未污染土壤保护,严控新增土壤污染。 6.防范建设用地新增污染。排放重点污染物的建设项目,在开展环境影响评价时,要增加对土壤环境影响的评价内容,并提出防范土壤污染的具体措施。需要建设的土壤污染防治设施,要与主体工程同时设计、同时施工、同时投产使用。环保部门要做好有关措施落实情况的监督管理工作。自;00年起,有关地方政府要与重点行业企业签订土壤污染防治责任书,明确相关措施和责任,并向社会公开。(省环保厅负责)	0	0	0	1	0	0	0	0	0	0	0	0	0	0
安徽省人民政府办公厅关于印发安徽省药品和医疗器械安全突发事件应急预案的通知	2.组织体系00省应急指挥部 特别重大、重大药品安全突发事件发生后,省人民政府成立重大药品安全突发事件应急指挥部(以下简称省应急指挥部),由省人民政府分管副省长任总指挥,省人民政府分管副秘书长、省食品药品监管局局长任副总指挥。省卫生厅、省委宣传部、省监察厅、省教育厅、省公安厅、省财政厅、省交通运输厅、省广电局、省政府新闻办、省网宣办、省信访局、省政府应急办为基本成员单位。根据事件处置工作需要,可增加相关部门和事发地人民政府为成员单位。 省应急指挥部职责:领导、组织、协调特别重大(Ⅰ级)、重大(Ⅱ级)药品安全突发事件的应急处置工作,决定启动安徽省药品和医疗器械安全突发事件应急预案,发布事件处置的重要信息,指导做好善后处置各项工作。 00省应急指挥部成员单位职责 省食品药品监管局:负责药品安全突发事件的应急值守、信息报告、综合协调等应急管理工作。负责控制事件涉及的相关药品,组织开展药品检验;…	0	0	0	0	0	0	0	0	0	0	0	0	0	1
福建省卫生和计划生育委员会、福建省深化医药卫生体制改革领导小组办公室关于印发福建省进一步改善医疗服务行动实施方案的通知	一、行动目标 自2015-;00年,用;00年时间,全面实施进一步改善医疗服务行动计划,坚持以病人为中心,以解决群众看病就医中的突出问题为切入点,创新思路、方法和举措,改善医疗服务环境,优化医疗服务流程,提升医疗服务质量,保障医疗服务安全,加强医患沟通协调,努力实现群众便捷就医、安全就医、有效就医、明白就医,医疗服务水平明显提升,群众看病就医感受明显改善,社会满意度明显提高,医患关系更加和谐。	0	0	0	0	0	1	0	0	0	0	0	0	0	0
河南省人民政府办公厅关于进一步加强药品安全监管工作的通知	四、加强基础设施建设,提升监管能力 (十四)运用现代科技手段,加强药品安全信息管理和综合利用,构建地区和部门间信息沟通平台,建立和完善覆盖全省的药品安全监管信息系统,实现监管信息互联互通和监管资源综合利用,创新监管手段,提高监管效能,使药品安全问题早发现、早整治、早解决。	1	0	0	0	0	0	0	0	0	0	0	0	0	0
上海市人民政府办公厅关于改革完善医疗卫生行业综合监管制度的实施意见	二、明确监管主体和责任,形成多元共治格局 (五)发挥社会监督作用。推进普法教育,增强公众健康权益意识。建立医疗卫生机构及其从业人员依法执业教育制度。畅通投诉举报渠道,整合优化医疗卫生行业投诉举报平台,健全投诉举报奖励制度。坚决曝光违法典型案件,震慑违法行为。发挥检验检测、审计、鉴定、评估等专业机构的监督作用,在监管执法中更多参考专业意见。	0	0	0	0	1	0	1	0	0	0	0	0	0	0
云南省人民政府办公厅关于印发全省发展中医药大会重点任务分解方案的通知	七、着力加快中医药产业发展 (二十八)促进产业集聚和区域联动发展依托昆明国家生物产业基地及曲靖、玉溪、楚雄、红河等产业园区,打造滇中现代中药(民族药)集聚区,强化西双版纳傣药、楚雄彝药、迪庆藏药等特色民族药产业布局。大力推进现代中药与民族药、新型疫苗和生物技术药产业集聚区建设,努力把昆明国家生物产业基地建设成为我国面向南亚东南亚生物经济国际合作的主要基地和具有竞争力的产业基地。(牵头单位:省发展改革委,各州、市人民政府;配合单位:省工业和信息化委、科技厅、财政厅、卫生计生委、农业厅、林业厅、商务厅、食品药品监管局)	0	0	0	1	0	0	0	0	1	0	0	1	0	0
国务院关于江苏省镇江市、江西省九江市职工医疗保障制度改革试点方案的批复	第五章 第二十六条 加强对医疗单位的有效制约,改善医疗服务,合理用药,合理检查,降低医疗费用。	0	0	0	0	1	0	0	0	0	0	0	0	0	0
河南省人民政府办公厅关于贯彻落实国办发〔2013〕80号文件精神做好深化医药卫生体制改革工作的实施意见	二、工作任务 (三)积极推进公立医院改革。 5.全面总结评估40个县级公立医院综合改革试点工作经验,研究解决改革中出现的新问题。县级公立医院改革重点要在建立长效补偿机制、建立健全法人治理结构、推进医药价格改革、深化人事分配制度改革、控制医药费用以及提高人员经费支出占业务支出的比例、提高医务人员待遇等方面开展探索。(省卫生厅、编办、发展改革委、财政厅、人力资源社会保障厅、中医管理局负责)	0	0	1	0	0	0	0	0	0	0	1	1	0	0
河北省人民政府办公厅关于印发河北省“十四五”医疗卫生服务体系规划的通知	围绕生命全周期和健康全过程,以“一老一少”为重点,加快完善妇幼健康、老年健康、职业健康、心理健康与精神卫生、血液供应保障服务体系,补齐健康教育、康复医疗、老年长期照护和安宁疗护等领域短板,建立完善3岁以下婴幼儿照护服务政策标准体系和服务供给体系,全面提高全方位全生命周期健康服务能力。	0	0	0	0	0	1	0	0	0	0	0	0	0	0
海南省人民政府办公厅关于印发《海南省土壤污染防治行动计划实施情况评估和考核办法(试行)》的通知	第五条评估和考核采用评分法,土壤污染防治目标完成情况和土壤污染防治重点工作完成情况满分均为100分,评估和考核结果分为优秀、良好、合格、不合格四个等级。评分90分(含)以上为优秀、80分(含)至90分为良好、60分(含)至80分为合格、60分以下为不合格(即未通过评估或考核)。 ;00年至;00年,每年年初对各市县政府上年度“省土十条”实施情况进行年度评估,评估土壤污染防治重点工作完成情况。 ;00年进行终期考核,考核土壤污染防治目标完成情况。按土壤污染防治目标完成情况划分等级,以;00年度土壤污染防治重点工作完成情况评估结果进行校核。校核评分高于80分(含)的,土壤污染防治目标完成情况评分等级即为考核结果;校核评分低于80分的,土壤污染防治目标完成情况评分等级降1级作为考核结果。 出现1次年度评估结果为不合格的,终期考核结果不得评为优秀;出现2次年度评估结果为不合格的,终期考核结果不得…	0	0	0	0	0	1	1	0	0	0	0	0	0	0
广东省人民政府办公厅转发省卫生厅关于我省新型农村合作医疗制度建设情况报告的通知	二、存在问题 (一)对新型农村合作医疗制度的认识有待提高。部分地区领导对建立新型农村合作医疗制度的意义认识不足,没有真正摆上重要议事日程,措施不落实,资金不到位,严重影响农村合作医疗的发展。部分地方干部存在畏难情绪,工作不够积极主动。部分群众对农村合作医疗互助共济的意义缺乏认识,怕吃亏,怀疑合作医疗能否坚持,担心资金被挪用。	0	0	0	0	0	1	0	0	0	0	0	0	0	0
宁夏回族自治区人民政府办公厅转发自治区卫生计生委等部门关于加快推进医疗卫生与养老服务相结合实施意见的通知	五、保障措施 (五)强化信息支撑。充分运用大数据、云计算、“互联网+”、物联网等信息技术,依托自治区政府云平台,在我区“卫生云”和“社保云”建设的基础上,汇集全区已退休和离休人员基本信息档案、电子健康档案、电子病历、养老保险、医疗保险等信息,以及各级医疗保险经办机构、定点医院和药店的相关信息,推动社区养老服务信息平台与区域人口健康信息平台对接,积极开展养老服务和社区服务信息惠民试点,实现医养结合信息平台数据标准化和信息共享。 以社会保障卡作为医养结合金融信息服务的有机载体,探索推进养老保险金、高龄津贴、特困老年人生活补贴等社会保障性资金领取“一卡通”,实现老年人就医、购药、医疗项目记录、医疗处方记录、实时医疗费用联网结算、金融机构联网在线金融服务等功能,推动“医养结合”信息化、社会化服务。	1	0	0	0	0	0	0	0	0	0	1	0	1	0
云南省人民政府办公厅关于印发云南省深化医药卫生体制改革2014年重点工作任务的通知	二、重点任务 (一)加快推动公立医院改革 4.建立科学补偿机制。破除以药补医,公立医院取消药品加成减少的合理收入通过调整医疗技术服务价格和增加政府投入,以及医院加强成本控制管理、节约运行成本等多方共担,由省财政、卫生部门牵头制定具体的补偿办法。落实政府对县级公立医院符合规划和卫生资源配置要求的投入政策,重点在每个县、市、区办好1-2所县级公立医院。落实对中医医院的投入倾斜政策。充分发挥医疗保险补偿作用,医保基金通过购买服务对医院提供的基本医疗服务予以及时补偿。(责任部门:省财政厅,省卫生行政管理部门;配合部门:省人力资源社会保障厅、物价局)	0	1	0	0	0	0	0	0	0	0	0	0	1	0
内蒙古自治区人民政府办公厅关于印发自治区2016年度大气污染防治实施计划的通知	三、保障措施 (四)严格考核奖惩 8.;00年12月524乌海市乌达区内蒙古广源物流公司采暖1422淘汰00.00.51	0	0	0	0	0	0	0	0	0	0	0	0	0	1
云南省人民政府办公厅关于促进医药产业健康发展的实施意见	二、主要任务 (三)支持发展化学药 重视化学原料药及制剂新产品、新技术引进,加强制剂技术,以及新辅料的研究、引进和推广,提高化学原料药及制剂仿制的起点和水平,加快化学原料药及制剂产品更新的步伐。支持具有自主知识产权的三七素、治疗脑卒中药物苯甲酸钾(dl-PHPB)、抗艾滋病注射用DT-835等新药品种研发以及莫吉司坦、扎托布洛芬、盐酸纳美芬等仿制药品研发,鼓励对蒿甲醚、天麻素、磷酸萘酚喹、铂类抗肿瘤药等化学药大品种实施二次开发。(责任单位:省科技厅、卫生计生委、发展改革委、工业和信息化委、食品药品监管局)	1	0	0	0	0	0	0	0	0	0	0	0	0	0
天津市人民政府关于进一步完善医疗保险制度的意见	八、加强医保监管 (二十九)探索建立医保诚信管理制度。按照加强社会诚信建设的要求,构建医保诚信管理系统,对医保相关方实行诚信管理。逐步建立医疗服务机构、医药企业、医护人员、参保人员的诚信管理名录,与市场主体信用信息公示系统、银行征信系统对接,形成诚信激励失信惩戒的联动管理机制。	0	0	0	0	0	0	1	0	0	0	0	0	0	0
吉林省人民政府办公厅印发关于改革完善全科医生培养与使用激励机制实施方案的通知	四、具体措施 (四)全面支持全科医生职业发展。 8.支持全科诊所发展。政府通过购买服务的方式,引导提供基本医疗卫生服务的非营利性全科诊所参与当地基本医疗卫生服务提供以及承接政府下达的相关任务,在人才培养等方面执行与政府办基层医疗卫生机构同等补助政策;对符合医保条件的,按规定纳入医保定点范围;对具备教学条件的,可认定为全科医生基层实践基地,承担全科医生培养任务;对服务质量稳定、群众满意度高的,有条件的地方可通过扩大服务购买范围、全科医生表彰奖励、一定财政补助等方式给予支持。推进政府监管、行业自律与社会监督并行,促进全科诊所规范发展。(牵头部门:省卫生计生委,配合单位:省教育厅、省财政厅、省人力资源社会保障厅、省中医药管理局)	0	0	1	0	0	0	0	0	0	1	0	0	1	0
广东省人民政府办公厅关于大力发展商业健康保险的实施意见	四、提升健康保险管理和服务水平 (一)夯实商业保险基础建设。商业保险机构要完善健康保险单独核算、精算、风险管理、核保、理赔和数据管理等制度。加强健康保险管理和专业技术人才队伍建设,强化从业人员职业教育,不断提升专业能力。完善经办基本医疗保险和承办城乡居民大病保险的组织架构,健全规章制度,加强人员配备,提高专业经营和服务水平。要精心做好参保群众就诊信息和医药费用审核、报销、结算、支付等工作,发挥统一法人和机构网络优势,开展异地转诊、即时结算服务,简化理赔手续,确保参保群众及时、方便享受医疗保障待遇。加强行业服务评价体系建设,规范健康保险服务标准,建立健全商业保险机构诚信记录制度,加强信用体系建设。(广东保监局负责)	0	0	1	0	1	1	0	0	0	0	0	0	0	0
江西省人民政府关于2009年上半年全省主要污染物总量减排工作进展情况的通报	一、减排进展情况今年以来,全省新增城市污水处理厂7座,新增日处理能力25万吨,现役燃煤发电机组新上脱硫设施5台套,总装机容量135万千瓦时,淘汰了一批高耗能、高污染的落后产能。经环境保护部核查核算,上半年全省化学需氧量排放量与上年同期相比下降00%,完成全年动态减排任务的52%;二氧化硫排放量与上年同期相比下降00%,完成全年动态减排任务的00%。两项指标均超过了省政府年初确定的比上年同期下降2%的目标。11个设区市中,除新余市化学需氧量排放量和宜春市、抚州市、南昌市二氧化硫排放量已经控制在“十一五"目标以内,只需消化新增量外,鹰潭市、上饶市、萍乡市和景德镇市化学需氧量减排任务完成进度超过了50%;九江市、上饶市、鹰潭市二氧化硫减排任务完成进度超过了50%,实现了减排任务完成进度赶上时间进度。但九江市、抚州市、宜春市、吉安市、赣州市化学需氧量减排任务未赶上时间进度(各设区市上半年减排进展…	0	0	0	1	0	1	0	0	0	0	0	0	0	0
山西省人民政府办公厅关于印发山西省推行环境污染第三方治理实施方案的通知	二、重点任务 (二)推进企业污染第三方治理。 4.探索实施限期企业污染第三方治理。选择电力、钢铁、建材、化工等重污染行业或工业园区,对因污染物超过排放标准或总量控制要求,被环境保护主管部门责令限制生产、停产整治且拒不自行治理污染的企业,列出企业清单向社会公布。完善环境污染治理修复行政代执行操作规程。督促不达标排放企业限期内委托环境服务公司进行污染治理。	0	0	0	0	0	0	1	0	0	0	0	1	0	0
河南省人民政府关于印发河南省2009年医药卫生体制改革实施方案的通知	二、推动建立国家基本药物制度 (八)以省为单位,对国家基本药物实行规范的公开招标采购,降低采购价格。建立向各级医疗卫生机构直接配送基本药物的机制,通过规范的竞争,确定配送企业,减少中间环节,降低配送成本。责任单位:省卫生厅、发展改革委、监察厅。	0	0	0	0	0	0	0	0	0	1	0	0	0	0
陕西省人民政府办公厅关于印发陕西省深化医药卫生体制改革2011年度主要工作安排的通知	二、;00年医改主要工作任务 (五)扩大药品“三统一”实施范围,完善药品招标采购机制。 3.基本药物配送企业面向全国进行公开遴选确定。鼓励发展现代物流等多种手段,提高配送效率。推动药品生产流通企业优化结构,实现规模经营。(省卫生厅、省食品药品监管局负责)	0	0	0	0	0	0	0	0	0	1	0	1	0	0
山东省人民政府办公厅关于改革完善全科医生培养与使用激励机制的通知	三、切实强化保障措施 (二)强化督导评估。省卫生计生委要会同有关部门加强政策培训,强化督导检查和第三方评估,及时总结推广好的经验做法。各地要建立健全目标责任督导考核机制,对全科医生培养与使用激励等政策措施落实情况实施定期调研督导和评估考核,及时研究解决实施中出现的问题和困难。	0	0	0	0	1	0	0	0	0	0	0	1	0	0
河南省人民政府关于印发河南省全民健身实施计划(2011—2015年)的通知	二、目标任务 (四)全民健身活动内容更加丰富。大力开展田径、游泳、乒乓球、羽毛球、足球、篮球、排球、网球等竞技性强、普及面广的体育运动项目,广泛组织传统武术、健身气功、太极拳(剑)、健身操(舞)、骑车、登山、跳绳、踢毽、门球等群众喜闻乐见、简便易行的健身活动。	0	0	0	0	0	1	0	0	0	0	0	0	0	0
山西省人民政府关于推进健康中国·山西行动的实施意见	二、主要任务 (十三)慢性呼吸系统疾病防治行动。引导重点人群早期发现疾病,控制危险因素,预防疾病发生发展。推动将肺功能检查纳入40岁以上人群常规体检内容,推行高危人群首诊测量肺功能。加强慢阻肺患者健康管理,为高危人群和患者提供全程防治管理服务。加强基层医疗卫生机构人员培训和设备配置,提高基层慢性呼吸系统疾病防治能力。到;00年和;00年,70岁以下人群慢性呼吸系统疾病死亡率下降到9/10万及以下和00/10万及以下。	0	0	0	0	1	1	0	0	0	0	0	0	0	0
海南省人民政府办公厅关于印发海南省医疗健康产业发展“十三五”规划的通知	四、重点发展领域与任务 (一)博鳌乐城国际医疗旅游先行区。 6.依托进入先行区的医疗机构,瞄准国际医疗健康前沿技术,紧密结合临床,积极建设若干国家级重点专科和实验室或研究性医疗中心,开展前沿的医学科研和先进技术的引进、吸收及转化,一方面在医疗服务中推动科研,另一方面以先进的科研成果支撑医疗服务,取得经济效益和技术效益的最佳结合。	1	0	0	1	0	0	0	0	0	0	0	0	0	0
内蒙古自治区人民政府办公厅关于印发水污染防治工作方案的通知	二、重点任务 (四)切实推动经济结构转型升级 1.调整产业结构 依法淘汰落后产能。自;00年起,各地要依据部分工业行业淘汰落后生产工艺装备和产品指导目录、产业结构调整指导目录及相关行业污染物排放标准,结合水质改善要求及产业发展情况,制定并实施分年度的落后产能淘汰方案,分别报上一级经信、环保部门备案。未完成淘汰任务的地区,暂停审批和核准其相关行业新建项目。(自治区经济和信息化委牵头,发展改革委、环保厅等参与) 严格环境准入。根据流域水质目标和主体功能区规划要求,明确区域环境准入条件,细化功能分区,实施差别化环境准入政策。建立水资源、水环境承载能力监测评价体系,实行承载能力监测预警,已超过承载能力的地区要实施水污染物削减方案,加快调整发展规划和产业结构。对未完成上年度水污染物总量减排目标的地区或企业暂停新增主要污染物排放建设项目的总量审批。到;00年,组织完成盟市、旗县(市、区)域水资源、水…	0	0	0	0	0	0	0	0	1	0	0	0	0	0
新疆维吾尔自治区人民政府办公厅关于印发自治区深化医药卫生体制五项重点改革2010年度主要工作安排的通知	二、工作任务 (一)加快推进基本医疗保障制度建设。 3.提高基本医保基金管理水平。主要工作目标: (3)积极做好农民工等流动就业人员基本医疗保险关系跨制度、跨地区转移接续工作,开展以异地安置退休人员为重点的就地就医、就地结算服务。(人力资源和社会保障厅、卫生厅负责)	0	0	0	0	1	0	0	0	0	0	0	0	0	0
辽宁省人民政府办公厅关于印发《政府办基层医疗卫生机构基本药物集中采购实施办法(试行)》的通知	第五章组织领导和监督管理 第二十二条坚持阳光采购,加强社会监督。由监察、纠风办等有关部门组成我省基本药物集中采购监督委员会,对基本药物采购过程进行监督。	0	0	0	0	0	0	1	0	0	0	0	0	0	0
海南省人民政府办公厅关于印发《海南省“十二五”主要污染物总量减排考核办法》、《海南省“十二五”主要污染物总量减排统计办法》和《海南省“十二五”主要污染物总量减排监测办法》等3个办法的通知	第四条各市县政府、洋浦经济开发区管委会和省直有关部门应当根据省政府下达的主要污染物总量减排任务要求和控制目标,结合本行政区域或本部门实际情况,制定主要污染物总量减排工作方案及年度计划,分解下达减排任务,并于当年3月底前将年度减排计划报送省主要污染物总量减排领导小组办公室。	0	0	0	0	1	0	0	0	0	0	0	0	0	0
江苏省政府办公厅关于印发江苏省“十三五”食品药品安全规划的通知	五、保障措施 (三)落实经费保障,提高资金使用效益。 各级政府要依法依规建立和完善食品药品安全经费投入机制,将食品药品安全工作经费列入政府预算,为食品药品安全工作提供保障。严肃财经纪律,规范资金使用行为,切实提高资金使用效益。	0	1	0	0	0	0	0	0	0	0	0	0	0	0
内蒙古自治区人民政府办公厅关于印发自治区2016年度大气污染防治实施计划的通知	三、保障措施 (四)严格考核奖惩 30.;00年6月562阿拉善盟阿拉善经济开发区阿拉善盟华钢太稀土金属有限责任 公司1采暖00.71拆除00.976	0	0	0	0	0	0	0	0	0	0	0	0	0	1
重庆市人民政府关于印发重庆市畜禽养殖区域划分管理规定和重庆市畜禽养殖区域划分及养殖污染控制实施方案的通知	四、任务及要求 (三)强化畜禽养殖区域管理 1.畜禽禁养区综合整治 畜禽禁养区内已有的畜禽养殖场,由区县(自治县)人民政府责令限期取缔或搬迁,并恢复土地原使用功能。因教学、科研、旅游以及其他特殊需要,在完善畜禽养殖污染防治工程措施,且保证不扩大畜禽养殖存栏规模的情况下,可经县级以上人民政府批准保留。实施了管网化沼液生态还田措施的畜禽养殖场,可以推迟至;00年底前取缔或搬迁。各年度重点整治区域如下: ;00年,集中式饮用水源保护区;群众投诉热点区域。 ;00年,主城九区的街道;建制镇以上城市建成区。 ;00年,执行Ⅰ类、Ⅱ类水质标准的河流、水库。 ;00年,自然保护区核心区和缓冲区,风景名胜区,森林公园重要景点和核心景区。	0	0	0	0	0	0	1	0	0	0	0	0	0	0
河北省人民政府办公厅关于印发河北省中医药健康服务发展规划(2015—2020年)的通知	二、重点任务 (二)加快发展中医养生保健服务。 3.开展中医特色健康管理服务。以“治未病”理念为指导,将中医药优势与健康管理结合,探索融健康文化、健康管理和健康保险为一体的中医健康保障模式。鼓励保险公司参与中医健康管理服务,开发中医药养生保健、“治未病”保险以及各类医疗保险、疾病保险、护理保险和失能收入损失保险等商业健康保险产品,通过中医健康风险评估和风险干预等方式,提供与商业健康保险产品相结合的疾病预防、健康维护和慢性病管理等中医特色健康管理服务。指导健康体检机构规范开展中医特色健康管理业务。积极利用各种平台传播中医药养生保健知识,引导人民群众科学认识中医药,培养健康生活方式和高尚精神追求。专栏2中医养生保健服务建设项目“治未病”服务体系建设实施区域“治未病”服务推进工程,强化省、市、县三级中医医院“治未病”中心(科)建设,指导、带动基层医疗机构提供规范的中医药预防保健服务。“治未病”…	0	0	0	1	0	0	0	1	0	0	1	0	0	0
内蒙古自治区人民政府办公厅关于印发自治区深化医药卫生体制改革2016年重点工作任务的通知	五、建立健全综合监管体系 (一)健全医药卫生监管机制。进一步健全医药卫生综合监管工作制度,加强事中事后监管。加强卫生全行业监管,将区域内所有医疗机构纳入所在地卫生计生行政主管部门的统一规划、统一监管。建立医疗卫生机构医疗费用等信息公开机制。(自治区卫生计生委、法制办、食品药品监管局、发展改革委负责)	0	0	0	0	1	0	0	0	0	0	0	0	0	0
福建省人民政府关于印发水污染防治行动计划工作方案的通知	三、主要任务 (九)严格环境执法监管 3.提升监管水平 提高海洋环境监管能力。健全海上联合执法和巡航监视制度,推进陆源入海排污口、涉海项目、江河入海口的环境监管,加强海洋倾废和海域采砂的执法监察。(省海洋渔业厅牵头,省环保厅、福建海事局参与) 完善水环境监测网络。根据国家统一规划,健全全省水环境监测网络。完善全省水资源环境统一监测管理平台,实现环保、水利、国土、住建、海洋等部门水质、水量监测数据共享。加强公共财力保障,加快落实福建省环境监管能力建设三年行动方案,提升饮用水水源水质全指标监测、水生生物监测、地下水环境监测、化学物质监测、海洋环境监测及环境风险防控技术支撑能力。(省环保厅、海洋渔业厅牵头,省发改委、国土厅、住建厅、交通运输厅、水利厅、农业厅、福建海事局等参与) 提高环境监管能力。加强环境监测、环境监察、环境应急等专业技术培训,严格落实执法、监测等人员持证上岗制度,加强基层环保…	1	0	0	0	0	0	1	0	0	0	0	1	0	0
福建省人民政府关于建立全科医生制度的实施意见	二、逐步规范全科医生培养制度 (四)规范全科医生培养模式。将全科医生培养逐步规范为“5+3”模式,即先接受;00年的临床医学(含中医学、中西医结合,下同)专业本科教育,再接受;00年的全科医生规范化培养。;00年的全科医生规范化培养实行“毕业后规范化培训”方式,培训对象主要从具有本科及以上学历的临床医学专业毕业生中招收,培训期间由经认定的培养基地在省卫生厅指导下进行管理。	0	0	1	0	0	0	0	0	0	0	0	0	0	0
广东省人民政府关于印发“十二五”期间深化医药卫生体制改革实施方案的通知	三、巩固完善基本药物制度和基层医疗卫生机构运行新机制,继续加强基层服务网络建设 (六)推进全科医生制度建设。 4.把建立全科医生制度作为强基层的关键举措,通过规范化培养、转岗培训、执业医师招聘和设置特岗等方式加强全科医生队伍建设,到;00年,为基层医疗卫生机构培养全科医生00万名以上(含中医全科医生),使每万名城市居民拥有2名以上全科医生,每个乡镇卫生院都有全科医生。(由省卫生厅、财政厅、发展改革委、人力资源社会保障厅、教育厅、中医药局负责)	0	0	1	0	0	1	0	0	0	0	0	0	0	0
国务院关于建立全科医生制度的指导意见	一、充分认识建立全科医生制度的重要性和必要性 (一)建立全科医生制度是保障和改善城乡居民健康的迫切需要。 我国是一个有13亿多人口的发展中国家,随着经济发展和人民生活水平的提高,城乡居民对提高健康水平的要求越来越高;同时,工业化、城镇化和生态环境变化带来的影响健康因素越来越多,人口老龄化和疾病谱变化也对医疗卫生服务提出新要求。全科医生是综合程度较高的医学人才,主要在基层承担预防保健、常见病多发病诊疗和转诊、病人康复和慢性病管理、健康管理等一体化服务,被称为居民健康的“守门人”。建立全科医生制度,发挥好全科医生的作用,有利于充分落实预防为主方针,使医疗卫生更好地服务人民健康。	0	0	0	0	0	0	0	0	0	0	0	0	0	1
重庆市人民政府办公厅关于贯彻落实国家中医药健康服务发展规划(2015—2020年)的实施意见	二、重点任务 (二)着力发展社会办中医医疗服务。支持社会资本举办三级中医综合医院,鼓励社会资本举办肛肠、骨伤、妇科、儿科等非营利性中医专科医院,鼓励社会资本举办中医特色康复医院、老年病医院、护理院、临终关怀医院等医疗机构。鼓励有资质的中医专业技术人员特别是名老中医开办中医诊所,允许药品经营企业举办中医坐堂医诊所。鼓励社会资本举办传统中医门诊部和中医诊所。	0	0	0	0	0	0	0	0	0	0	0	1	0	0
广东省人民政府办公厅关于印发广东省医疗卫生领域省级与市县财政事权和支出责任划分改革实施方案的通知	二、保障措施 (三)强化责任落实。各地级以上市、县(市、区)政府要切实落实本级财政医疗卫生投入责任。要在充分考虑当地经济社会发展水平和财政承受能力的基础上,合理确定医疗卫生领域各类财政事权的地区标准,完善动态调整机制,确保财政可持续。对于确因财力薄弱无法承担支出责任的市县政府,省级通过规范的一般性转移支付予以托底保障。	0	1	0	0	0	0	0	0	0	0	0	0	0	0
内蒙古自治区人民政府关于水污染防治行动计划的实施意见	三、重点任务 (七)充分发挥市场机制作用。 引导社会资本、增加政府资金投入,促进多元融资。认真贯彻落实财政部、环境保护部联合印发的《关于推进水污染防治领域政府和社会资本合作的实施意见》(财建﹝2015﹞90号),针对水污染防治领域项目特点,遴选一批饮用水水源地环境综合整治、河流环境生态修复与综合整治、污染场地修复、城市黑臭水体治理、畜禽养殖污染防治、农业面源污染治理等重点项目实施PPP模式,实现组合开发,吸引社会资本投入水环境保护。积极推动设立融资担保基金,推进环保设备融资租赁业务发展。推广股权、项目收益权、特许经营权、排污权等质押融资担保,鼓励社会资本加大水环境保护投入。各地区和各有关部门要重点支持污水处理、污泥处理处置、河道整治、饮用水水源保护、畜禽养殖污染防治、水生态修复、应急清污等项目和工作。对环境监管能力建设及运行费用分级予以必要保障。	0	1	0	0	0	0	1	1	0	0	0	1	0	0
陕西省人民政府办公厅关于印发陕西省深化医药卫生体制改革2011年度主要工作安排的通知	二、;00年医改主要工作任务 (二)提升基本医疗保障水平,减轻群众医疗负担。 3.提高补助标准。各级财政对城镇居民医保和新农合补助标准提高到每人每年200元。(省财政厅、省卫生厅、省人力资源和社会保障厅负责)	0	0	0	0	0	0	0	0	0	0	0	0	1	0
海南省人民政府办公厅关于印发海南省污染水体治理三年行动方案的通知	二、治理范围 (一)全省城镇区域、重要旅游景区和人口较多乡镇Ⅳ类及以下水质的91个城镇内河(湖)污染水体(见附件1)。	0	0	0	0	1	0	0	0	0	0	0	0	0	0
江苏省政府办公厅关于改革完善全科医生培养与使用激励机制的实施意见	江苏省政府办公厅关于改革完善全科医生培养与使用激励机制的实施意见 (苏政办发〔2018〕52号) 各市、县(市、区)人民政府,省各委办厅局,省各直属单位: 全科医生是综合程度较高的医学人才,主要在基层承担预防保健、常见病多发病诊疗和转诊、患者康复和慢性病管理、健康管理等一体化服务,被称为居民健康“守门人”。加快培养大批合格的全科医生,发挥好全科医生作用,对于完善基层医疗卫生服务体系、推进家庭医生签约服务、建立分级诊疗制度、维护和增进人民群众健康,具有重要意义。为贯彻落实《国务院办公厅关于改革完善全科医生培养与使用激励机制的意见》(国办发〔2018〕3号),进一步完善全科医生制度,深入推进健康江苏建设,经省人民政府同意,现提出如下实施意见:	0	0	0	0	0	0	0	0	0	0	0	0	0	1
江西省人民政府办公厅转发省卫生计生委等部门关于推进医疗卫生与养老服务融合发展的实施意见	一、总体目标 到;00年,建成一批兼具医疗卫生和养老服务资质的医疗卫生机构或养老机构(以下统称医养结合机构)。基层卫生巡诊服务覆盖80%的街道、乡镇,并将基层养老机构纳入巡诊范围;全科医生、乡村医生签约服务覆盖70%的街道、乡镇,为居家老年人提供预防、保健、医疗、康复等综合卫生服务。80%以上的医疗卫生机构开设为老年人提供挂号、就医等便利服务的绿色通道。全省老年病床数力争达到2万张左右,各设区市至少有1所二级以上老年病医院或护理院,并实行单独的考核政策。50%以上的养老机构能够以不同形式为入住老年人提供医疗卫生服务。 到;00年,符合省情的医养结合体制机制和政策法规体系基本建立。基层医疗卫生机构对养老机构开展巡诊服务实现全覆盖;全科医生、乡村医生对所有的街道、乡镇老年人签约服务实现全覆盖;医疗卫生机构为老年人提供挂号、就医等便利服务的绿色通道实现全覆盖;养老机构以不同形式为入住老年人提供…	0	0	0	1	0	1	0	0	0	0	0	0	0	0
北京市人民政府关于授予程毓馥、刘桂芹、张明菖、陈余卿四同志为“白求恩式医生”光荣称号的决定	北京市人民政府关于授予程毓馥、刘桂芹、张明菖、陈余卿四同志为“白求恩式医生”光荣称号的决定 京政发[198231号 七一一医院五官科主任程毓馥,北京积水潭妇产科主任刘桂芹、燕山石油化学总公司职工医院内科副主任张明菖、北京医学院第三附属医院内科主治医师陈余卿四同志,在被派到上沃尔特执行援外医疗任务期间,不幸于一九八一年十二月十九日下午遇车祸牺牲,四位同志上沃尔特工作期间,认真贯彻执行党的外交路线,努力履行国际主义义务,全心全意为上沃尔特人民服务,他们不怕苦,不怕累、对技术精益求精,对病人满腔热忱,克服困难,创造条件,千方百计为当地人民接解除病痛,他们的这种忘我精神和精湛医术,不仅受到上沃尔特政府和人民的高度赞扬,而且被附近国家的人民广为传颂,给我们伟大的祖国争了光。为了表彰他们的爱国主义和国际主义精神,市人民政府决定授予程毓馥、刘桂芹、张明菖、陈余卿四位同志“白求恩式医生”的光荣称号。市人…	0	0	0	0	0	0	0	0	0	0	0	0	0	1
贵州省人民政府办公厅关于印发贵州省“十二五”民族医药和特色食品及旅游商品特色产业发展规划的通知	三、发展总体思路、发展原则和目标 (三)发展目标。 2.特色食品和旅游商品 ;00年,实现工业总产值500亿元,年均增长20%以上,投资100亿元,特色食品产业新增就业8万人。到;00年,全省旅游商品产业规模迅速扩大,旅游商品质量和档次明显提高,整体竞争力和可持续发展能力大幅增强,把旅游商品产业培育成为我省的特色优势产业,为工业强省战略提供支撑,走出一条“小商品、大市场”、“小企业、大集群”、“小老板、大产业”、“小创业、大就业”、“小专业、大品牌”、“小配套、大规模”、“小特长、大人才”、“小带动、大富民”的路子。全省旅游购物收入达550亿元,年均增速25%,占全省旅游总收入的比重达到25%。旅游商品新增就业20万人,共解决和带动就业200万人。	0	0	1	0	0	1	0	0	0	0	0	1	0	0
吉林省人民政府办公厅关于加快发展健身休闲产业的实施意见	四、组织实施 (六)强化督查落实。各地区、各有关部门要研究制定推进健身休闲产业发展的实施方案,细化目标任务,推动责任落实。省体育局、省文化和旅游厅等部门要会同有关部门,对全省健身休闲产业的推进落实情况进行监督检查和跟踪分析,重大事项及时向省政府报告。	0	0	0	0	1	0	0	0	0	0	0	0	0	0
内蒙古自治区人民政府办公厅关于印发振兴蒙医药行动计划(2017—2025年)的通知	三、重点任务 (六)蒙医药人才队伍建设行动。 8.蒙药技术创新团队建设工程。培养和引进一批蒙药药材培育、种植(养殖)、产品研发、生产工艺、检验检测、职业化管理等方面的创新实用人才。推进蒙药师承教育,建立蒙药继承创新人才队伍,为蒙药产业发展提供智力保障和人才支持。(自治区人力资源社会保障厅、教育厅、卫生计生委、食品药品监管局、科技厅、发展改革委、财政厅)	0	0	1	0	0	0	0	0	0	0	0	0	0	0
福建省人民政府办公厅关于印发2005年度全省治理“餐桌污染”建设“食品放心工程”工作方案的通知	三、治理水产品污染 (十六)由省海洋与渔业局负责开展省级水产品药残及贝类有毒有害物质检测工作,增加藻类有毒有害物残留检测,继续开展织纹螺安全食用预警预报和织纹螺毒素研究工作。	0	0	0	0	1	0	0	0	0	0	0	0	0	0
辽宁省人民政府办公厅关于印发《政府办基层医疗卫生机构基本药物集中采购实施办法(试行)》的通知	第一章总则 第一条为建立规范的基本药物省级集中采购机制,切实保障群众安全用药,进一步减轻医药费用负担,根据《国务院办公厅关于印发建立和规范政府办基层医疗卫生机构基本药物采购机制指导意见的通知》(国办发〔2010〕56号)等文件精神,结合我省实际,制定本办法。	0	0	0	0	0	0	1	0	0	0	0	0	0	0
新疆维吾尔自治区人民政府关于进一步加强新型农牧区合作医疗试点工作的通知	八、充分发挥各级协调领导小组的组织协调作用 各部门要各司其职,密切配合,协调一致。卫生行政部门是牵头单位,要积极提出意见和建议,抓好具体工作的落实,对整体工作进行宏观指导。要发挥中医民族医药简、便、效、廉的特色与优势,培养农牧区卫生机构的中医民族医药技术人员;财政部门要负责做好补助资金的预算和安排,并且督促各级财政予以落实。研究制定基金管理制度,加强基金管理,做好监督检查,确保基金安全;农业部门要结合农牧区工作特点,配合做好新型农牧区合作医疗试点工作的宣传、推广和发动工作,协助对筹资的管理,监督基金的使用;民政部门要完善农牧区医疗救助制度,解决好五保户、特困户的就医难问题;发展改革部门要研究新型农牧区合作医疗的发展问题,将建立新型农牧区合作医疗制度纳入国民经济和社会发展规划,在制定“十一五”规划时,提出有关新型农牧区合作医疗的发展目标,要完善农牧区医药价格监管政策;人事编制部门积极推进新…	0	0	0	0	1	0	0	1	0	0	0	0	1	0
江西省人民政府办公厅转发省卫生计生委等部门关于推进医疗卫生与养老服务融合发展的实施意见	二、主要任务 (六)积极发展中医药健康养老服务。大力开发中医药与养老服务相结合的系列服务产品,建设糖尿病医疗康复养生养老中心等3-5个医养结合示范基地。探索建立中医药特色医养结合机构,鼓励有条件的中医院举办养老院,实行院中院模式。鼓励新建以中医药健康养老为主的康复医院、护理院,支持有条件的养老机构设置以老年病、慢性病防治为主的中医诊室。二级以上中医医院开设老年病科,增加老年病床数量,开展老年病、慢性病防治和康复护理,为老年人就医提供优先优惠服务。支持有条件的中医医院开展社区和居家中医药健康养老服务,为老年人建立健康档案,建立医疗契约服务关系,开展上门诊视、健康查体、保健咨询等服务。支持养老机构开展融合中医特色健康管理的老年人养生保健、医疗、康复、护理服务。建立中医医疗机构与养老机构合作机制,县级以上中医院要与1所较大规模的养老机构建立合作关系,探索设立中医医疗机构和养老机构之间的就诊绿色…	0	0	0	0	0	0	0	0	1	0	1	0	0	0
北京市人民政府办公厅转发市人力社保局市、财政局关于北京市市级公费医疗改革办法的通知	第十条单位补充医疗保险按照缴费基数的4%的比例提取费用,;00年提取比例暂定为3%。由同级财政列入部门预算,由用人单位按照规定的缴费比例按月缴纳,市级单位补充医疗保险统筹管理。在缴费比例不超过4%的前提下,需要调整缴纳比例时,由市人力社保部门会同市财政部门确定。	0	0	0	0	0	0	1	0	0	0	0	0	0	0
内蒙古自治区人民政府办公厅关于做好冬季采暖期原煤燃烧污染治理工作的通知	三、加快能源结构调整 大力推广使用天然气等清洁能源,加快管网及配套设施建设,提高城市及周边地区天然气普及率,新增天然气应优先保障居民生活或用于替代燃煤。自治区发展改革委要会同经济和信息化委等部门制定补偿措施,对城中村、城乡结合部实施煤改气进行补贴;对采暖期城区分散采暖居民改用燃气采暖的气价进行补贴,努力减少生活供暖用煤带来的污染。	0	0	0	1	0	0	0	0	0	0	0	0	1	0
内蒙古自治区人民政府办公厅关于印发自治区2016年度大气污染防治实施计划的通知	三、保障措施 (四)严格考核奖惩 9.;00年12月底780呼和浩特市回民区内蒙古昌盛泰房地产开发有限责任公司锅炉房QXW7生活供热103590拆并/改气00.7212	0	0	0	0	0	0	0	0	0	0	0	0	0	1
内蒙古自治区人民政府办公厅关于印发自治区2016年度大气污染防治实施计划的通知	三、保障措施 (四)严格考核奖惩 7.;00年年底385乌兰察布市集宁区第二医院供热2200拆改00.38	0	0	0	0	0	0	0	0	0	0	0	0	0	1
福建省人民政府关于建立全科医生制度的实施意见	四、改革全科医生执业方式 (十六)引导全科医生以多种方式执业。取得执业资格的全科医生一般注册1个执业地点,也可以根据需要多点注册执业。全科医生可以在基层医疗卫生机构(或医院)全职或兼职工作,也可以独立开办个体诊所或与他人联合开办合伙制诊所。鼓励组建由全科医生和社区护士、公共卫生医生或乡村医生等人员组成的全科医生团队,划片为居民提供服务。在县级医疗机构、乡镇卫生院和社区卫生服务机构执业的全科医生,从事基层医疗卫生服务工作,确因工作需要,经县卫生局考核批准,报设区市卫生局备案,可申请同一类别至多三个专业作为执业范围进行注册。要健全基层医疗卫生机构对全科医生的人力资源管理办法,规范私人诊所雇佣人员的劳动关系管理。	0	0	1	0	0	0	0	0	0	0	0	0	0	0
重庆市人民政府办公厅关于推进医疗保障基金监管制度体系改革的实施意见	三、建立健全医保基金监管制度体系 (二)完善协议管理制度。建立健全常态化、全覆盖的医保结算费用审核制度。完善基本医疗保险协议管理,简化优化医药机构定点申请、专业评估、协商谈判程序,强化对定点医药机构协议履行情况的督促检查,突出行为规范、服务质量、费用控制、医保基金风险防控考核评价,完善定点医药机构动态管理和退出机制。(责任单位:市医保局、市卫生健康委)	0	0	0	0	0	0	1	0	0	0	0	0	0	0
海南省人民政府办公厅关于印发海南省医药产业“十三五”发展规划指导意见的通知	二、指导思想、基本原则和发展目标 (二)基本原则。 2.市场主导,政府引导。 以市场需求为导向,充分发挥市场在资源配置中的决定性作用,强化企业市场主体地位,激发企业活力和创造力;转变政府职能,在产业规划、产业政策、质量监管等方面引导和推动产业健康发展。	0	0	0	0	0	0	0	0	0	0	0	1	0	0
山西省人民政府办公厅关于转发省环保厅、省发展改革委山西省环境主要污染物超量减排补偿办法(试行)的通知	第一条为鼓励市、县政府在完成污染物排放总量减排任务、企业在达到排污许可量基础上,继续采取各种措施,持续实施污染减排,加速改善环境质量,根据国家及省有关法律、法规、规章规定,特制订本办法。	0	0	0	0	0	0	1	0	0	0	0	0	0	0
国务院办公厅关于印发控制污染物排放许可制实施方案的通知	一、总体要求(二)基本原则 精简高效,衔接顺畅。 排污许可制衔接环境影响评价管理制度,融合总量控制制度,为排污收费、环境统计、排污权交易等工作提供统一的污染物排放数据,减少重复申报,减轻企事业单位负担,提高管理效能。 公平公正,一企一证。 企事业单位持证排污,按照所在地改善环境质量和保障环境安全的要求承担相应的污染治理责任,多排放多担责、少排放可获益。向企事业单位核发排污许可证,作为生产运营期排污行为的唯一行政许可,并明确其排污行为依法应当遵守的环境管理要求和承担的法律责任义务。 权责清晰,强化监管。 排污许可证是企事业单位在生产运营期接受环境监管和环境保护部门实施监管的主要法律文书。企事业单位依法申领排污许可证,按证排污,自证守法。环境保护部门基于企事业单位守法承诺,依法发放排污许可证,依证强化事中事后监管,对违法排污行为实施严厉打击。 公开透明,社会共治。 排污许可证申领、核发、监管…	0	0	0	0	0	1	0	0	0	0	0	0	0	0
重庆市人民政府关于组建重庆医药高等专科学校的通知	重庆市人民政府关于组建重庆医药高等专科学校的通知 (渝府〔2006〕62号) 市政府各部门,有关单位: 根据《高等教育法》和《普通高等学校设置暂行条例》以及全国高等学校设置评议委员会的评议结果,教育部日前下发《关于同意重庆市药剂学校、重庆市卫生学校、重庆市第二卫生学校合并组建重庆医药高等专科学校的通知》(教发函〔2006〕52号),同意重庆市药剂学校、重庆市卫生学校和重庆市第二卫生学校合并组建重庆医药高等专科学校,同时撤销重庆市药剂学校、重庆市卫生学校和重庆市第二卫生学校建制。 重庆医药高等专科学校系专科层次的普通高等学校,由市人民政府领导和管理,以实施高等专科教育为主,全日制在校生规模暂定5000人。 市政府有关部门要加强对重庆医药高等专科学校的管理和指导,帮助其尽快完成升格后的有关工作,积极推进学校改革和发展。市卫生局要加强对重庆医药高等专科学校的管理,加大经费投入,加快基础设施、学…	0	1	1	1	0	0	0	0	0	0	0	0	0	0
陕西省人民政府办公厅关于印发2015年度主要污染物总量减排实施方案的通知	三、减排重点 (三)推进工业企业减排工程建设。落实好;00年纳入国家目标责任书和省委目标责任考核的68个减排项目,确保按期建成投运。按照《关中地区重点行业大气污染物排放限值》(DB61-941-2014),对电力、钢铁、有色、水泥、玻璃等行业企业以及燃煤锅炉实施技术升级改造和污染治理,确保达标排放,降低单位工业增加值排放强度。完成陕西渭河热电厂、大唐灞桥热电厂等关中地区18台763万千瓦燃煤火电机组超低排放改造工程,推进全省其他燃煤火电机组脱硫提标、除尘改造和脱硝工程。加强钢铁、水泥、造纸、石化等重点行业治污设施运行监管,确保达标运行。	0	0	0	0	1	0	0	0	0	0	0	0	0	0
内蒙古自治区人民政府办公厅关于印发2016年度水污染防治计划的通知	三、重点任务 (七)全力保障水生态环境安全。 2.各盟市要全面开展饮用水水源保护区内排污口和违法建筑排查清理工作。单一水源供水的盟市要开展备用水源或应急水源建设工作。缺水地区不达标水源必须配套净水设施,加强农村饮用水水源保护和水质检测,确保供水水质达标。(自治区水利厅、环保厅牵头,自治区发展改革委、财政厅、住房城乡建设厅、卫生计生委等部门参与)	0	0	0	0	0	0	1	0	0	0	0	0	0	0
山东省人民政府办公厅关于贯彻国办发〔2015〕13号文件进一步加强乡村医生队伍建设的实施意见	五、保障乡村医生合理待遇 (二)拓宽乡村医生发展空间。在同等条件下,乡镇卫生院优先聘用具有执业医师、执业助理医师资格的乡村医生,进一步吸引执业医师、执业助理医师和医学院校毕业生到村卫生室工作。进一步推进乡镇卫生院对村卫生室人员、业务、财务、药品和绩效考核等乡村卫生服务一体化管理。市、县(市、区)政府要积极创造条件,逐步推行村卫生室的人、财、物全部纳入乡镇卫生院管理的紧密型一体化管理模式。要以乡村卫生服务一体化管理为抓手,结合医疗联合体组建工作,探索建立“县招、乡管、村用”用人制度。各县(市、区)统一组织招用乡村医生,建立乡村医生人才库,并在各县(市、区)卫生计生部门备案。乡镇医疗卫生机构对招用人员统一管理,统一安排到村卫生室执业。各市要选择1-2个县(市、区)的部分乡镇在;00年开展试点。	0	0	1	0	0	0	0	0	0	0	1	0	0	0
安徽省人民政府办公厅关于加快推进社会力量举办医疗机构的实施意见	四、促进社会办医健康发展 1.积极营造社会办医良好氛围。社会办医疗机构医疗纠纷调解纳入全社会医患纠纷调处机制范围,创建平安医院。充分利用广播、电视、报纸、网络等媒体,深入解读国家和省有关的政策措施,大力宣传社会办医疗机构在医疗卫生服务体系中的重要地位和作用,形成有利于社会办医疗机构发展的良好氛围。 安徽省人民政府办公厅 ;00年10月24日	0	0	0	0	1	0	0	0	0	0	0	0	0	0
内蒙古自治区人民政府办公厅关于印发自治区2016年度大气污染防治实施计划的通知	三、保障措施 (四)严格考核奖惩 40.;00年12月510鄂尔多斯市鄂托克旗内蒙古中谷矿业有限公司----供暖2200淘汰00.	0	0	0	0	0	0	0	0	0	0	0	0	0	1
海南省人民政府办公厅关于印发海南省区域统筹区城镇居民基本医疗保险实施办法的通知	第五章医疗服务管理 第十九条定点医疗机构的医务人员应当因病施治,坚持合理检查、合理治疗、合理转诊的原则,严格按照规定的医疗诊治技术规范诊治,为参保人提供良好的医疗服务。	0	0	0	0	0	0	1	0	0	0	0	0	0	0
国务院办公厅关于印发深化医药卫生体制改革2019年重点工作任务的通知	一、研究制定的文件 1.制定加强医生队伍管理的办法。 (国家卫生健康委负责,;00年11月底前完成)	0	0	0	0	0	1	0	0	0	0	0	0	0	0
广东省人民政府关于印发“十二五”期间深化医药卫生体制改革实施方案的通知	三、巩固完善基本药物制度和基层医疗卫生机构运行新机制,继续加强基层服务网络建设 (七)促进人才向基层流动。 6.进一步完善相关政策措施,鼓励引导医务人员到基层服务;建立上级医院与基层医疗卫生机构之间的人才合作交流机制,探索县域人才柔性流动方式,促进县乡人才联动;开展免费医学生定向培养,实施全科医生特岗计划,充实基层人才队伍;严格落实二级以上医院和疾病预防控制机构医生晋升中高级职称前到农村服务累计一年以上的政策;鼓励大医院退休医生到基层和农村执业;对到艰苦边远地区基层医疗卫生机构服务的医务人员,落实津补贴政策或给予必要补助。(由省卫生厅、发展改革委、财政厅、人力资源社会保障厅、教育厅、中医药局负责)	0	0	1	0	0	0	0	0	0	0	0	0	1	0
陕西省人民政府办公厅关于印发加快医学教育创新发展实施方案的通知	二、主要任务 (八)促进中医药教育传承创新发展。集中优势资源做大做强中医学、针灸推拿学、中药学等中医药主干专业,布局中医养生学、中医康复学等服务生命全周期的中医药专业。将中医疾病防治和中医药经典相关课程融入中医基础与临床课程,强化学生中医思维培养。在省级优秀教材奖评选中倾斜支持符合中医药教育规律的教材。探索多学科交叉创新型中医药人才培养,做好名老中医学术经验继承和老药工传统技艺传承工作,将师承教育贯穿临床实践教学全过程。实施中西医联合创新行动,围绕中医优势病种,挖掘经典名方、医院制剂、临床验方等,加快推动疗效确切、临床价值高的中药创新药的研发和产业化。	0	0	1	0	0	0	0	0	0	0	0	0	0	0
广东省人民政府办公厅关于印发广东省深化医药卫生体制改革2016年工作要点的通知	十、大力发展健康服务业 (一)加快发展社会办医。落实《广东省人民政府办公厅关于印发广东省促进社会办医加快发展实施方案的通知》(粤府办〔2016〕51号),及时开展落实情况督查,形成公立医疗机构与社会办医疗机构优势互补、良性竞争、分工协作、健康发展的新格局。(省卫生计生委、发展改革委负责,省财政厅、商务厅、中医药局参与)	0	0	0	0	0	0	0	0	0	0	0	1	0	0
海南省人民政府办公厅关于印发《海南省“十二五”主要污染物总量减排考核办法》、《海南省“十二五”主要污染物总量减排统计办法》和《海南省“十二五”主要污染物总量减排监测办法》等3个办法的通知	第十三条各级环境保护行政主管部门应当建立污染源基础信息档案和监测数据库,按季度逐级报送污染源监督性监测数据。	0	0	0	0	0	0	1	0	0	0	0	0	0	0
内蒙古自治区人民政府办公厅关于印发自治区2016年度大气污染防治实施计划的通知	三、保障措施 (四)严格考核奖惩 1.;00年12月503鄂尔多斯市杭锦旗金瑞源小区--CG-361供暖5500淘汰00.00.58	0	0	0	0	0	0	0	0	0	0	0	0	0	1
吉林省人民政府办公厅印发关于改革完善全科医生培养与使用激励机制实施方案的通知	四、具体措施 (二)全力提升全科医生培养质量。 9.严格培训基地动态管理。将全科专业基地建设和作用发挥情况列为培训基地考核评估的核心指标。综合医院住院医师规范化培训基地要从人员配备、基础条件、教学设施等方面全面加强全科专业基地建设,增加全科医疗诊疗科目,独立设置全科医学科,以人才培养为目的开展全科临床、教学和科研工作,联合基层医疗卫生机构培养全科医生。调整助理全科医生培训基地区域布局,以三级综合医院为重点,完善教育教学设施设备和学员住宿条件,提升培训能力和水平。(牵头部门:省卫生计生委、省中医药管理局分别负责,配合单位:省发展改革委、省财政厅、省教育厅)	0	0	1	1	0	0	0	0	0	0	0	0	0	0
河南省人民政府办公厅关于实施河南省淮河、海河、黄河中上游流域水污染防治规划(2006－2010年)的通知	一、《规划》是我省完成国家重点流域水污染防治规划有关工作的依据,是水污染防治工作的基础。各省辖市政府和省政府有关部门要根据《规划》确定的原则、目标和任务,结合本地、本部门实际,制定实施方案,认真抓好落实。	0	0	0	0	0	0	1	0	0	0	0	0	0	0
内蒙古自治区人民政府办公厅关于印发自治区2016年度大气污染防治实施计划的通知	三、保障措施 (四)严格考核奖惩 9.;00年12月底754呼和浩特市回民区呼和浩特市回民区怡康居供暖设施维修服务部邮电器材锅炉房立式炉生活供热2718拆并/改气00.5442	0	0	0	0	0	0	0	0	0	0	0	0	0	1
江西省人民政府办公厅关于印发江西省“十三五”中医药发展规划的通知	三、主要任务 (四)切实推进中医药继承创新。 3.加强中医药理论研究与技术传承。深化中医药基础理论、中医药类优势技术、疗效评价标准的系统研究,建立概念明确、结构合理的中医药基础理论体系。加强旴江医学等民间医药的整理发掘和传承创新,建立中医药传统知识保护数据库、保护名录和保护制度,做大做强中药老字号品牌。开展对中医药民间特色诊疗技术及老药工经验的调查、挖掘整理、研究评价及推广应用,支持中医秘方的知识产权保护和产业化开发。对我省2000多种中药材特别是抗病毒类中药材逐一开展物质基础及质量标准研究,建立起国家认可、国际认同的赣药标准体系。推进科技资源和数据信息开放共享,加强名老中医传承服务平台、中医药传统知识保护研究平台、中药资源动态监测及服务体系、中药种质资源库等特色资源平台建设。	1	0	0	0	0	0	0	0	0	0	0	1	0	0
内蒙古自治区人民政府办公厅关于印发《内蒙古自治区本级职工基本医疗保险管理办法》等五个办法的通知[附：内蒙古自治区本级职工大额医疗保险管理办法、内蒙古自治区本级职工基本医疗保险费用结算办法、内蒙古自治区本级职工基本医疗保险转诊转院和特殊医疗项目检查及治疗管理办法、内蒙古自治区本级职工基本医疗保险个人账户及社会保障卡管理办法]	第四章基本医疗保险基金的支付 第二十三条参保人员住院治疗期间,按医嘱使用乙类药品、基本医疗保险支付部分费用的诊疗项目,在抢救、急救期间按医嘱使用血液制品、蛋白类制品的其费用均先由本人支付10%,其余部分由统筹基金和个人按规定比例支付。	0	0	0	0	0	0	1	0	0	0	0	0	0	0
江西省人民政府办公厅关于印发江西省“十三五”中医药发展规划的通知	三、主要任务 (一)切实提高中医医疗服务能力。 2.全面提升中医医疗服务水平。实施中医临床优势培育工程,高标准建设江西热敏灸医院。加强专科专病防治体系建设。建立中医药参与突发公共卫生事件应急网络和应急救治工作协调机制,提高中医药应急救治和重大传染病防治能力。推动建立融入中医药内容的社区健康管理模式,开展高危人群中医药健康干预。建立中医医院与基层医疗卫生机构、疾病预防控制机构分工合作的慢性病综合防治网络和工作机制,加快形成急慢分治的分级诊疗秩序。提升中医医疗机构管理与服务能力,完善中医医疗质量控制体系和评审评价体系,开展中医特色优势诊疗服务地方标准研制。	0	0	0	0	1	0	0	0	0	0	0	0	0	0
江苏省人民政府关于建立全科医生制度的实施意见	一、建立全科医生制度的总体要求和目标任务 (一)总体要求。以邓小平理论和“三个代表”重要思想为指导,深入贯彻落实科学发展观,按照深化医药卫生体制改革的总体思路,遵循医疗卫生事业发展和全科医生培养规律,坚持政府主导,同时发挥市场机制作用,建立完善全科医生培养、使用、管理和激励制度,全面提高我省城乡基层医疗卫生服务水平。坚持以强化临床实践能力为重点,规范培养模式,统一培养标准,严格考试考核,确保全科医生培养质量;改革全科医生执业方式,建立健全激励机制,引导全科医生到基层执业,逐步增加基层医生队伍中全科医生的比重;统筹当前与长远,既致力于建立统一规范的全科医生制度,又注重多渠道培养全科医生,满足现阶段基层对全科医生的需要,加快形成以全科医生为主体的基层医疗卫生队伍,为城乡居民提供安全、有效、方便、价廉的基本医疗卫生服务,不断提高人民群众健康水平。	0	0	1	0	0	1	0	0	0	0	0	1	0	0
福建省人民政府办公厅关于印发2005年度全省治理“餐桌污染”建设“食品放心工程”工作方案的通知	五、治理加工食品污染 (二十六)由省卫生厅负责开展全省食品卫生许可证专项整治,以规范保健食品、婴幼儿配方食品、面粉、熟肉制品、调味品、食品添加剂和饮料生产企业的食品卫生许可证发放和监督为重点,查处无证和不符合卫生许可条件的企业。积极推行食品卫生监督量化分级管理制度,开展对流通环节和消费环节皮蛋、酱油、月饼、蜜饯等的卫生质量抽检。由省食品药品监管局负责核发并加强保健品生产企业许可证的管理,督促保健食品生产企业实施质量管理规范。	0	0	0	0	0	0	1	0	0	0	0	0	0	0
江西省人民政府办公厅关于印发江西省“十三五”中医药发展规划的通知	三、主要任务 (三)全面提升中药产业发展水平。 6.挖掘中药产业发展潜能。建设中国(南昌)中医药科创城,以中药产业发展为目标,按照“双核驱动、协同发展”的模式,构建技术创新及成果转化体系,推动高端人才集聚,打造国际有影响、国内领先的中国药谷。推动临床疗效确切的院内中药制剂在省内依法调剂使用,并开展相关基础研究与新药开发研究。充分发挥我省中药资源特色优势,开展中药食疗产品、中药香精油、中药化妆品、中药兽药等系列产品的开发及应用推广。	0	0	1	0	0	0	0	0	1	0	0	0	0	0
国务院关于建立全科医生制度的指导意见	八、积极稳妥地推进全科医生制度建设 (三十五)做好舆论宣传引导。 通过健康教育、舆论宣传等方式培养居民的预防保健观念,引导居民转变传统就医观念和习惯,增强全社会的契约意识,为实施改革营造良好环境。 国务院 二○一一年七月一日	0	0	0	0	1	0	0	0	0	0	0	0	0	0
海南省人民政府办公厅关于调整城镇居民基本医疗保险有关政策的通知	三、关于区域统筹区城镇居民基本医疗保险政策调整 (二)居民住院支付比例调整为:一级医院,统筹基金支付70%,个人负担30%;二级医院,统筹基金支付60%,个人负担40%;三级医院,统筹基金支付50%,个人负担50%。	0	0	0	0	0	0	1	1	0	0	0	0	0	0
福建省人民政府办公厅关于印发2005年度全省治理“餐桌污染”建设“食品放心工程”工作方案的通知	五、治理加工食品污染 (三十二)由省卫生厅、食品药品监管局负责,工商局配合,开展保健食品专项整治,严格审批和标准备案的工作,严厉打击未经审批生产销售保健食品行为和非法添加药物成分以及超范围、虚假宣传保健功能行为。	0	0	0	0	0	0	1	0	0	0	0	0	0	0
西藏自治区人民政府办公厅转发民政厅等部门关于进一步完善城乡医疗救助制度全面开展重特大疾病医疗救助工作实施意见的通知	五、申请审核审批程序 (一)申请受理与审核。城乡居民向户籍所在乡(镇)人民政府或街道办事处设立的便民服务大厅(社会救助窗口)提出医疗救助申请,申请人无行为能力无法提交申请的,由村(居)委会或所在单位代为提交。跨省安置困难退休人员向工资关系管理部门提出申请。申请人需如实提供以下相关材料: 1.个人书面申请;	0	0	0	0	1	0	0	0	0	0	0	0	0	0
广东省人民政府办公厅关于大力发展商业健康保险的实施意见	一、总体要求 (二)发展目标。到;00年,基本建立市场体系完备、产品形态丰富、经营诚信规范的现代商业健康保险服务业,实现服务能力明显提升、服务领域更加广泛、投保人数大幅增加,商业健康保险赔付支出占卫生总费用的比重显著提高,成为全省社会医疗保障体系的重要支柱。	0	0	0	0	0	1	0	0	0	0	0	1	0	0
重庆市人民政府关于印发重庆市深化医药卫生体制综合改革试点方案的通知	三、主要任务 (二)建立完善分级诊疗制度。 1.积极推进医疗联合体建设。各区县(自治县)公立医院采取县乡一体化或医疗协作的方式,与本行政区域内乡镇卫生院和社区卫生服务机构建立医疗联合体,;00年各区县(自治县)均要建立医疗联合体。市级公立医院可通过托管或医疗协作的方式与区县(自治县)公立医院组建医疗联合体。鼓励探索多种上下联动形式,按照利益共享、责任共担原则,在医疗联合体内部建立分工协作、双向转诊机制。加强城乡对口帮扶,推进医师多点执业,鼓励城市二级以上医院医师到基层医疗卫生机构多点执业,制定区县(自治县)高级职称医务人员到基层医疗机构坐诊挂号费特殊政策,促进优质资源下沉。(牵头部门:市卫生计生委;配合部门:市人力社保局、市物价局)	0	0	0	0	1	0	0	0	0	0	0	0	0	0
江西省人民政府办公厅印发关于改革完善全科医生培养与使用激励机制实施方案的通知	二、主要任务 (一)建立健全全科医生培养制度。 2.完善毕业后全科医学教育制度。扩大全科专业住院医师规范化培训招收规模,力争到;00年全科专业招收数量达到当年总招收计划的20%,并逐年增加。将全科专业招收任务完成情况纳入住院医师规范化培训基地考核,并与财政补助资金挂钩。各级财政要按规定加大对全科专业住院医师规范化培训和助理全科医生培训的支持。鼓励市县级财政配套专项补助经费。继续开展助理全科医生培训。农村订单定向免费培养的本科医学生毕业后全部纳入全科专业住院医师规范化培训,纳入定向就业协议规定的服务期,明确其培训时间。对于单位委派参加住院医师规范化培训和助理全科医生培训的人员,委派单位应与其签订协议,就培训期间待遇、培训期满后服务年限、违约处理办法等进行约定。	0	0	1	0	0	0	0	0	0	0	0	0	1	0
吉林省人民政府关于加快推进医药健康支柱产业发展的实施意见	二、重点推进工作 (二)做优生物制药产业。坚持创制与仿制并举,保持和增强我省疫苗、胰岛素和生长素等生物药产品在国内的竞争优势,开展重组蛋白、抗体药物等基因工程药物研发与产业化,推进多组分生化药物大品种技术提升,保持和增强生物制药产业竞争优势。到;00年,生物制药产业实现销售产值200亿元。 2.基因工程新药创制。加快单克隆抗体、重组蛋白等基因工程药物的研发与产业化。	1	0	0	0	0	1	0	0	0	0	0	0	0	0
贵州省人民政府办公厅关于印发贵州省“十二五”民族医药和特色食品及旅游商品特色产业发展规划的通知	四、主要任务和发展重点 (二)民族医药。 1.积极引导制药企业重组整合,加快企业规模发展步伐 积极引进国内外大型制药集团和各种资金投资我省制药行业,资产重组、架构重建。重点做大做强益佰、百灵、同济堂、信邦、神奇、威门等制药龙头骨干企业。以大集团带动和促进中小型制药企业向“专、精、特、新”方向发展,形成我省制药行业以大型集团为主导、大中小型企业协调发展的格局。鼓励支持组建贵州苗药集团等2-3家大型制药企业集团,培育年产值超5亿元以上的制药企业15家,其中:10-30亿元的5家,30亿元以上的3家;力争培育年销售额超1亿元以上的单品种药品40个,其中:5亿元以上的11-15个,10亿元以上的3-5个,建成规范化种植示范基地20个。 加快实施贵州益佰工业园建设、黔峰生物科技园、贵阳黔峰生物制品有限责任公司血液制品生产线建设、贵州同济堂制药公司针剂生产线、金康制药有限责任公司年产4亿粒胶囊、20…	0	0	0	0	0	0	0	0	1	0	0	0	0	0
青海省人民政府办公厅关于印发青海省2017年度水污染防治实施方案的通知	青海省人民政府办公厅关于印发青海省;00年度水污染防治实施方案的通知 (青政办[2017105号) 各市、自治州人民政府,省政府各委、办、厅、局: 《青海省;00年度水污染防治实施方案》已经省政府同意,现印发给你们,请认真贯彻执行。 青海省人民政府办公厅 ;00年6月14日 青海省;00年度水污染防治实施方案 为深入贯彻《国务院关于印发水污染防治行动计划的通知》(国发[201517号)和《青海省人民政府关于印发<青海省水污染防治工作方案>的通知》(青政[2015100号),推进我省;00年度水污染防治各项重点工作任务落实,根据《青海省水污染防治目标责任书》和《水污染防治行动计划考核规定(试行)》等要求,结合我省水污染防治工作实际,制定本方案。	0	0	0	0	0	0	0	0	0	0	0	0	0	1
新疆维吾尔自治区人民政府办公厅印发贯彻国务院深化医药卫生体制改革领导小组关于进一步推广深化医药卫生体制改革经验的若干意见的实施方案的通知	九、加强组织领导,增强深化医改的主动性和创造性 (三)切实做好宣传工作。加强对医改典型经验的挖掘和宣传,反映鲜活的医改实践和进展成效,坚定改革信心,凝聚改革共识。坚持正确的舆论导向,及时回应社会关切,合理引导社会预期,为深化医改营造良好舆论环境。	0	0	0	0	1	0	0	0	0	0	0	0	0	0
国务院办公厅关于印发深化医药卫生体制改革2019年重点工作任务的通知	一、研究制定的文件 4.制定改进职工医保个人账户政策文件。 (国家医保局负责,;00年12月底前完成)	0	0	0	0	0	1	0	0	0	0	0	0	0	0
内蒙古自治区人民政府办公厅关于印发自治区2016年度大气污染防治实施计划的通知	三、保障措施 (四)严格考核奖惩 1.;00年6月563阿拉善盟阿拉善经济开发区阿拉善左旗赛建水泥制品有限责任公司1采暖00.64拆除00.252	0	0	0	0	0	0	0	0	0	0	0	0	0	1
山西省人民政府关于印发山西省“十二五”期间深化医药卫生体制改革规划暨实施方案的通知	三、重点任务 (九)加强卫生信息化建设。 充分发挥信息资源的辅助决策和技术支撑作用,促进信息技术与管理、诊疗规范和日常监管有效融合。加快建立全省统一的电子健康档案、电子病历、药品器械、医疗服务、医保信息等数据标准体系,积极推进医疗卫生信息技术标准化建设。加强信息安全标准建设。加强区域信息平台建设,有效整合现有信息资源,推动医疗卫生信息资源共享。“十二五”末,基本建立满足社会需求的公共卫生服务、医疗服务、医疗保障、药品供应保障体系和综合卫生管理信息系统,实现省域内互联互通、信息共享,力争实现与国家级信息平台的互联互通。全面加强县乡医疗机构远程诊疗会诊系统。加快推进基层医疗卫生机构信息化建设,建立涵盖基本药物供应、居民健康管理、基本医疗服务、绩效考核等功能的基层医疗卫生信息系统,提高基层医疗卫生服务水平。到“十二五”末,100%的乡镇卫生院和社区卫生服务机构建立信息系统,100%的行政村卫生…	1	0	0	0	0	1	0	0	0	0	0	0	0	0
河南省人民政府办公厅关于印发河南省2009年度主要污染物总量减排计划实施方案的通知	一、总则 (二)编制依据。 7.《河南省人民政府关于下达;00年全省主要污染物排放总量控制计划的通知》(豫政〔2009〕27号);	0	0	0	0	0	0	1	0	0	0	0	0	0	0
河南省人民政府办公厅关于做好2010年全省污染源普查动态更新调查工作的通知	我省;00年更新调查范围涉及4个领域、2万余家重点调查单位,调查内容包括水污染物12项、大气污染物6项以及工业固体废物等多个类别。更新调查主要内容如下:	0	0	0	0	0	0	0	0	0	0	0	0	0	1
山西省人民政府关于推进健康中国·山西行动的实施意见	二、主要任务 (三)全民健身行动。推进基本公共体育服务体系建设,努力打造百姓身边健身组织和“15分钟健身圈”。为不同人群提供针对性的运动健身方案或运动指导服务。推进公共体育设施免费或低收费开放。推动形成体医结合的疾病管理和健康服务模式。把高校学生体质健康状况纳入对高校的考核评价内容。到;00年和;00年,城乡居民达到《国民体质测定标准》合格以上的人数比例分别大于00%和00%,经常参加体育锻炼人数比例达到37%及以上和40%及以上。	0	0	0	0	1	1	0	0	0	0	0	0	0	0
河北省人民政府关于建立统一的城乡居民基本医疗保险制度的意见	七、信息系统建设 按照“标准统一,资源共享、数据集中、服务延伸”的原则,建立健全全省统一的城乡居民医疗保险信息系统。完善城乡居民医疗保险信息系统数据标准和运行规范,加强医疗监控和基金监管,强化信息安全和患者隐私保护。推行“互联网+”医疗保险便民服务模式,方便城乡居民参保、缴费和就医结算。 各统筹地区做好信息系统维护,实现医疗保险经办机构之间,医疗保险经办机构与定点医疗机构、定点零售药店之间高效运行。各级政府要加大信息系统建设和长期运行维护投入,形成稳定可靠的政府投入机制。	1	0	0	0	0	0	0	0	0	0	0	0	0	0
内蒙古自治区人民政府办公厅关于印发自治区2016年度大气污染防治实施计划的通知	三、保障措施 (四)严格考核奖惩 1.;00年12月683通辽市经济技术开发区厚德种业CLSG-系列供热00.8淘汰00.00.25	0	0	0	0	0	0	0	0	0	0	0	0	0	1
国务院办公厅关于印发第二次全国污染源普查方案的通知	二、普查时点、对象、范围和内容 (二)普查对象与范围。 5.移动源。普查对象为机动车和非道路移动污染源。其中,非道路移动污染源包括飞机、船舶、铁路内燃机车和工程机械、农业机械等非道路移动机械。	0	0	0	0	1	0	0	0	0	0	0	0	0	0
国务院关于建立全科医生制度的指导意见	二、建立全科医生制度的指导思想、基本原则和总体目标 (六)总体目标。 到;00年,在我国初步建立起充满生机和活力的全科医生制度,基本形成统一规范的全科医生培养模式和“首诊在基层”的服务模式,全科医生与城乡居民基本建立比较稳定的服务关系,基本实现城乡每万名居民有2-3名合格的全科医生,全科医生服务水平全面提高,基本适应人民群众基本医疗卫生服务需求。	0	0	0	0	0	1	0	0	0	0	0	0	0	0
国务院办公厅关于印发第二次全国污染源普查方案的通知	普查对象为中华人民共和国境内有污染源的单位和个体经营户。范围包括:工业污染源,农业污染源,生活污染源,集中式污染治理设施,移动源及其他产生、排放污染物的设施。	0	0	0	0	1	0	0	0	0	0	0	0	0	0
广西壮族自治区人民政府办公厅关于印发广西促进“互联网+医疗健康”发展实施方案的通知	一、健全“互联网+医疗健康”服务体系 (一)推进“互联网+”医疗服务。 1.推动医疗机构大力提升医院管理水平,应用互联网等信息技术拓展医疗服务空间和内容,构建覆盖诊前、诊中、诊后的线上线下一体化医疗服务模式。到;00年,全区三级甲等医院全面开展“互联网+”医疗服务。 允许依托医疗机构发展互联网医院。医疗机构可以使用互联网医院作为第二名称,在实体医院基础上,运用互联网技术提供安全适宜的医疗服务,允许注册或者备案的执业医师在线开展部分常见病、慢性病复诊,允许掌握患者病历资料后,在线开具部分常见病、慢性病处方。 支持医疗卫生机构、符合条件的第三方机构搭建互联网信息平台,开展远程医疗、健康咨询、健康管理服务。(责任单位:自治区卫生计生委、发展改革委。排在第一位的部门为牵头部门,下同)	1	0	0	0	0	1	0	0	0	0	0	1	0	0
天津市人民政府关于印发天津市"十二五"期间深化医药卫生体制改革规划暨实施方案的通知	八、建立强有力的实施保障机制 (四)搞好宣传,正确引导。坚持正确的舆论导向,采取通俗易懂、生动形象的方式,广泛宣传、解读改革政策,解答群众关心的问题,及时总结、宣传改革经验,为深化医药卫生体制改革营造良好的社会和舆论环境。	0	0	0	0	1	0	0	0	0	0	0	0	0	0
天津市人民政府关于印发天津市"十二五"期间深化医药卫生体制改革规划暨实施方案的通知	三、进一步健全全民医保体系 (四)提高基本医保管理服务水平。继续巩固和完善基本医疗保险即时结算结报,做好基本医疗保险与城乡医疗救助、优抚对象补助以及基本医疗保险意外伤害附加保险结算衔接。做好职工医保制度内跨省市转移接续,推进跨省市医疗费用异地结算工作。建立具有基金管理、费用结算与控制、医疗行为管理与监督等复合功能的医保信息系统,并与定点医疗机构信息系统对接。 加强基本医保基金收支管理。职工医保基金结余要控制在合理水平,城乡居民医保基金要坚持当年收支平衡的原则。增强基本医保基金抗风险能力,完善基本医保基金管理监督和风险防范机制,控制医疗费用过快增长,防止基本医保基金透支,保障基金安全。	1	0	0	0	0	0	0	1	0	0	0	0	1	0
河北省人民政府办公厅关于印发河北省“十四五”医疗卫生服务体系规划的通知	一、发展基础 (一)发展现状。“十三五”时期,我省从强基层、补短板、优布局着手,着力构建覆盖城乡所有居民的医疗卫生服务体系,有力维护了全省人民生命安全和身体健康,为现代化经济强省、美丽河北建设提供了重要保障。 4.群众健康水平持续改善。覆盖全体城乡居民的基本公共卫生服务内容不断丰富,从12项拓展到31项,人均补助从40元提高到74元。全省00万因病致贫返贫人口成功摆脱贫困,实现贫困人口“有地方看病、有人看病、有制度保障看病”目标。人均预期寿命提高到00岁,孕产妇死亡率、婴儿死亡率、5岁以下儿童死亡率分别降低到00/10万、00‰、00‰,主要健康指标均达到预期目标。 我省医疗卫生服务体系建设虽然取得了一定进展,但与经济社会高质量发展要求和人民群众日益增长的高品质、多样化健康需求相比,还存在弱项。医疗卫生资源结构与布局不尽合理。每百万人口三级医院数低于全国平均水平,每千人口医疗卫生机构床位…	0	0	0	0	0	0	0	0	0	0	0	0	0	1
内蒙古自治区人民政府办公厅关于印发自治区2016年度大气污染防治实施计划的通知	三、保障措施 (四)严格考核奖惩 5.;00年12月底695呼和浩特市新城区内蒙古商品交易中心有限责任公司物业管理中心锅炉房生活供热41436拆并/改气00.08841	0	0	0	0	0	0	0	0	0	0	0	0	0	1
海南省人民政府办公厅关于印发海南省医疗健康产业发展“十三五”规划的通知	五、保障措施 (七)加大招商引资,引入优质医疗资源。加大招商工作力度,利用博鳌亚洲论坛、京交会、夏洽会等活动以及日常招商工作,积极宣传推介我省医疗健康产业投资方向与政策,吸引民间资本、海内外基金、国内国际资本等以合资、合作等多种方式投资我省医疗健康产业。鼓励民间资本与国外先进医疗机构合作,引入优质医疗资源。加强点对点招商工作,积极上门引资,主动服务,吸引优质企业投资我省医疗健康产业。支持和鼓励保险资金在我省博鳌乐城国际医疗旅游先行区等区域兴办医疗、体检、疗养等机构。	0	0	0	0	0	0	0	1	0	0	0	1	0	0
新疆维吾尔自治区人民政府办公厅贯彻落实国务院办公厅关于进一步加强乡村医生队伍建设实施意见的意见	七、进一步完善乡村医生补偿政策 (一)提高乡村医生补助标准。 2.基本公共卫生服务补助。对乡村医生提供的基本公共卫生服务,通过购买服务的方式给予补助。原则上将50%左右的基本公共卫生服务任务交由村卫生室承担,绩效考核后拨付相应资金。未来新增的基本公共卫生服务补助资金继续重点向乡村医生倾斜,用于加强村级基本公共卫生服务工作。	0	0	0	0	1	0	0	0	0	1	0	0	1	0
吉林省人民政府办公厅关于印发吉林省深化医药卫生体制改革2012年主要工作安排的通知	二、工作任务 (五)着力推进公共卫生六大体系建设。 6.巩固基本药物保障体系建设。建立省级基本药物集中采购使用管理信息系统,落实集中付款和供应配送政策,提高及时配送率,完善结算和监管系统,实现网络化常态运行。(省卫生厅、财政厅负责)	1	0	0	0	0	0	0	0	0	1	0	0	0	0
安徽省人民政府办公厅关于印发安徽省医疗卫生领域财政事权和支出责任划分改革实施方案的通知	二、主要内容 (三)计划生育方面。 3.计划生育家庭补助。对省级或市以下所属职能部门、国有企事业单位依法落实独生子女保健费政策,根据其隶属关系、单位性质及财政供给政策给予保障或补助,分别划分为省级财政事权或市以下财政事权,由同级财政承担支出责任,同级财政根据单位性质、财政供给政策给予保障或补助。现阶段,省级财政根据补助需求、财力状况等因素统筹安排预算资金,按照人口规模及结构、人均可用财力、人均卫生投入、目标考核等因素和一定的系数权重分配转移支付资金,市县财政据实安排补助资金。	0	0	0	0	0	0	0	0	0	0	0	0	1	0
青海省人民政府办公厅转发省经贸委等部门关于分离省属国有企业自办医疗机构实施意见的通知	四、经费来源 (三)破产企业和特困企业移交的自办医疗机构,其支出大于收入的,前三年由省财政比照当地国有医疗机构正常开支水平,确定定额标准,给予差额补助,三年后逐步实行自收自支,自负盈亏。	0	1	0	0	0	0	0	0	0	0	0	0	0	0
吉林省人民政府办公厅关于加快发展健身休闲产业的实施意见	结合国家健身休闲重点运动项目发展规划和目录,支持具有消费引领性、运动体验性的健身休闲项目发展,因地制宜,充分利用各地自然资源优势,科学规划,差异化发展,以长春为中心,辐射长白山区域和松花江、鸭绿江、图们江流域以及松辽平原、西部草原的冰雪体育、山地运动、户外健身、民族体育四大体育产业集群;以冰雪产业为特色,构建健身休闲产业“陆、水、空”三维空间项目体系布局。	0	0	0	0	0	0	0	0	1	0	0	0	0	0
福建省人民政府办公厅关于印发2005年度全省治理“餐桌污染”建设“食品放心工程”工作方案的通知	八、其他有关分工 (五十七)由省食品药品监管局负责组织起草制定《关于开展食品安全信用体系建设指导意见》。厦门市人民政府负责抓好国家和省在厦门市的食品安全信用体系建设试点工作,福州市重点抓好建立流通领域食品安全企业信用档案试点工作,并在制度和机制上有所创新。	0	0	0	0	0	0	0	0	0	0	1	0	0	0
海南省人民政府办公厅关于印发《海南省“十二五”主要污染物总量减排考核办法》、《海南省“十二五”主要污染物总量减排统计办法》和《海南省“十二五”主要污染物总量减排监测办法》等3个办法的通知	第九条统计过程中,对各类污染物排放量的测(估)算方法及相关系数的选取方法依照国家《“十二五”主要污染物总量减排统计办法》的有关规定执行。	0	0	0	0	0	0	1	0	0	0	0	0	0	0
内蒙古自治区人民政府办公厅关于印发自治区2016年度大气污染防治实施计划的通知	三、保障措施 (四)严格考核奖惩 2.;00年年底306乌兰察布市丰镇市丰镇市房屋管理局锅蒙UL0303SZD00-00/95/70-AⅢ居民供暖2300取缔00.57	0	0	0	0	0	0	0	0	0	0	0	0	0	1
吉林省人民政府办公厅关于印发《吉林省省直机关事业单位保健对象医疗保险管理办法(试行)》的通知	第五条原享受公费医疗待遇的省直单位保健对象的医疗补贴资金由省财政列入当年财政预算,按核定的标准拨付;原未享受公费医疗待遇的省直自收自支事业单位的保健对象由所在单位按核定的医疗补贴标准缴纳补贴资金。	0	0	0	0	0	0	0	0	0	0	0	0	1	0
云南省人民政府办公厅关于印发推进医疗保障基金监管制度体系改革重点任务清单的通知	三、强化监管方式创新,增强基金监管能力探索建立第三方力量参与医保基金监管机制。加强医保信息系统建设,建立全省统一的大数据实时动态智能监管平台。大力推行医保电子凭证,积极推进“互联网+监管"。健全医保信用评价指标体系,着力构建以信用为基础的新型监管机制,提升监管的专业性、精准性和规范性。	1	0	0	0	0	0	1	0	0	0	0	1	0	0
福建省人民政府办公厅关于印发2005年度全省治理“餐桌污染”建设“食品放心工程”工作方案的通知	八、其他有关分工 (四十六)由省发展改革委、农业厅负责,加快农产品检验检测体系建设,;00年底前基本建成以省部级农业质量监督检验中心为龙头,以区域性农业质检中心为补充,以市县级农业质检中心为骨干,以生产基地、农贸市场、龙头企业检测室(站、点)为基础的,省、市、县、农产品主产区(基地)、市场多层次的农业质量检测网络。	0	0	0	0	1	0	0	0	0	0	0	0	0	0
贵州省人民政府关于批转贵州省主要污染物总量减排统计监测及考核办法的通知	十、不符合国家产业政策的企业或生产线关闭情况 指标定义:《责任书》中规定的不符合国家产业政策的水污染严重企业和生产能力、工艺、设备与产品淘汰关停完成情况。 数据来源:经贸部门。	0	0	0	0	1	0	0	0	0	0	0	0	0	0
四川省人民政府办公厅关于印发支持社会力量提供多层次多样化医疗服务实施方案的通知	五、严格行业监管和行业自律 (二十一)加强全行业监管。推进医疗卫生行业综合监管制度建设,转变监管理念,创新监管手段,提升监管效能,强化医疗卫生全行业监管。加强监管体系建设,强化卫生计生监督机构特别是基层机构的监管能力,推进全省卫生计生监督执法人员职位分级管理试点工作。在加强日常管理的基础上,全面推行“双随机”抽查方式。依托省、市、县三级全民健康信息平台,联通各级医疗机构,逐步实现对医疗机构、医务人员、医疗行为的全面监管。充分发挥社会组织对社会办医疗机构的监管作用,建立与公立医疗机构同等的约谈整改制度。严厉打击非法行医、医疗欺诈、出租出借《医疗机构执业许可证》、出租承包科室、虚假违法医疗广告宣传等行为,加强医疗养生类节目监管。加强对社会办非营利性医疗机构产权归属、财务运营、资金结余使用等方面的监督管理,非营利性医疗机构不得将收支结余用于分红或变相分红。加强对营利性医疗机构盈利率的管控。对医…	0	0	0	0	0	0	1	0	0	0	0	1	0	0
贵州省人民政府办公厅关于印发贵州省“十二五”民族医药和特色食品及旅游商品特色产业发展规划的通知	三、发展总体思路、发展原则和目标 (二)发展原则。 坚持政府引导、企业主导、市场运作的原则。充分发挥政府在促进产业发展中的引导和协调作用,积极创造良好政策环境,着力培育优强企业。建立健全市场营销服务体系,突出发挥企业主导作用,加强公共服务平台建设。实施“大企业、大品牌”战略,引导企业重组整合,走集团化、集约化道路,提高产业集中度。 坚持技术进步原则。加快技术进步步伐,坚持技术引进与自主创新相结合,不断提高技术装备水平,以及新产品、新技术的开发应用水平,使重点骨干企业整体技术和装备水平达到国内先进水平。鼓励和支持企业加大知识产权的开发和保护力度,在做大做强现有名优品牌的过程中,重点培育全国性品牌,带动区域性品牌发展,逐步实现由品牌向名牌的转变,进一步扩大国内外市场的影响力和占有率。	1	0	0	0	1	1	0	0	0	0	0	1	0	0
天津市人民政府办公厅关于学生儿童参加天津市城乡居民基本医疗保险有关问题的通知	四、参保学生、儿童因治疗需要转外地就医的,参照原市劳动保障局和市卫生局印发的《天津市城镇职工基本医疗保险转诊转院管理办法》(津劳局〔2001〕316号)执行。	0	0	0	0	0	0	1	0	0	0	0	0	0	0
新疆维吾尔自治区人民政府办公厅关于印发自治区深化医药卫生体制五项重点改革2010年度主要工作安排的通知	二、工作任务 (一)加快推进基本医疗保障制度建设。 1.巩固扩大基本医疗保障覆盖面。主要工作目标: (3)巩固新型农村合作医疗(以下简称新农合)覆盖面,参合率稳定在97%以上。(卫生厅负责)	0	0	0	0	0	0	0	0	0	0	0	0	1	0
江苏省残疾预防和残疾人康复实施办法	第二章残疾预防 第十一条县级以上地方人民政府组织有关部门、残疾人联合会等开展下列残疾预防工作: (四)加强筛查、统计等工作,建立残疾人口数据信息报告制度。	0	0	0	0	1	0	0	0	0	0	0	0	0	0
广东省人民政府办公厅关于大力发展商业健康保险的实施意见	二、发展多样化的商业健康保险服务 (三)提高医疗执业保险覆盖面。加快发展医疗责任保险、医疗意外保险,探索发展多种形式的医疗执业保险,健全医疗风险分担机制,完善医疗纠纷人民调解工作机制。支持医疗机构和医师个人购买医疗执业保险,医师个人购买的医疗执业保险适用于任一执业地点。鼓励通过商业保险等方式提高医务人员的医疗、养老保障水平以及解决医疗职业伤害保障和损害赔偿问题。(省卫生计生委、省司法厅、广东保监局负责)	0	0	0	0	0	0	0	1	0	0	0	0	0	0
江西省人民政府办公厅关于印发江西省“十三五”中医药发展规划的通知	三、主要任务 (四)切实推进中医药继承创新。 4.提升江西中医药大学办学水平。落实《江西省人民政府与国家中医药管理局共建江西中医药大学协议》,提升江西中医药大学科研实力。加强中医药国际交流与合作,大力推广热敏灸技术,推进岐黄国医外国政要江中体验中心建设。深化教育教学改革,支持将中医学、中药学列入江西省一流学科建设规划,力争建成国家一流学科。	0	0	1	0	0	0	0	0	0	0	0	1	0	0
国务院关于建立全科医生制度的指导意见	三、逐步建立统一规范的全科医生培养制度 (七)规范全科医生培养模式。 将全科医生培养逐步规范为“5+3”模式,即先接受;00年的临床医学(含中医学)本科教育,再接受;00年的全科医生规范化培养。在过渡期内,;00年的全科医生规范化培养可以实行“毕业后规范化培训”和“临床医学研究生教育”两种方式,具体方式由各省(区、市)确定。 参加毕业后规范化培训的人员主要从具有本科及以上学历的临床医学专业毕业生中招收,培训期间由全科医生规范化培养基地在卫生部门(含中医药管理部门)和教育部门共同指导下进行管理。全科方向的临床医学专业学位研究生按照统一的全科医生规范化培养要求进行培养,培养结束考核合格者可获得全科医生规范化培养合格证书;临床医学专业学位研究生教育以教育部门为主管理。	0	0	1	0	0	1	0	0	0	0	0	0	0	0
国务院关于印发“十二五”期间深化医药卫生体制改革规划暨实施方案的通知	六、统筹推进相关领域改革 (一)提高基本公共卫生服务均等化水平。 逐步提高人均基本公共卫生服务经费标准,;00年达到40元以上,免费为城乡居民提供健康档案、健康教育、预防接种、传染病防治、儿童保健、孕产妇保健、老年人保健、高血压等慢性病管理、重性精神疾病管理、卫生监督协管等国家基本公共卫生服务项目。加强健康促进与教育,实施国民健康行动计划,将健康教育纳入国民教育体系。主要媒体要加强健康知识宣传。倡导健康的生活方式,引导科学就医和安全合理用药。到;00年,城乡居民健康档案规范化电子建档率达到75%以上;高血压、糖尿病患者规范化管理率达到40%以上。 逐步增加国家重大公共卫生项目,继续开展国家免疫规划,艾滋病和结核病、血吸虫病等重大传染病防治,农村孕产妇住院分娩补助、适龄妇女“两癌”(宫颈癌、乳腺癌)检查等重大公共卫生服务专项,农村孕产妇住院分娩率稳定在96%以上。重点做好食品安全(包括餐饮…	0	0	0	0	1	1	0	0	0	0	0	0	0	0
吉林省人民政府办公厅印发关于改革完善全科医生培养与使用激励机制实施方案的通知	四、具体措施 (一)加快补充全科医生队伍数量。 5.完善全科医生使用管理。对经住院医师规范化培训合格后到农村基层执业的全科医生,可实行县管乡用(县级医疗卫生机构聘用管理、乡镇卫生院使用);对经助理全科医生培训合格后到村卫生室工作的助理全科医生,可实行乡管村用(乡镇卫生院聘用管理、村卫生室使用)。县管乡用、乡管村用的全科医生、助理全科医生可实行轮换派遣制度,轮换时间由派出单位和派驻单位根据工作任务需要协商确定。派遣全科医生实行双重管理,期满考核由派出医疗机构和派驻基层单位共同负责。(牵头部门:省卫生计生委、省中医药管理局分别负责,配合单位:省人力资源社会保障厅)	0	0	1	0	0	0	1	0	0	0	0	0	0	0
甘肃省人民政府办公厅关于2012年上半年省政府环保目标责任书落实情况及污染减排工作进展情况的通报	三、存在的主要问题 (三)个别建设项目“三同时”执行不到位和未批先建问题依然存在。要求6月30日前验收并正常运行的榆中钢铁有限公司焦炉煤气脱硫工程和临泽圣洁纸品厂废水治理工程,仍未通过环保验收,不能发挥减排作用。华亭中煦煤化工有限责任公司60万吨/年煤制甲醇项目,在试生产期间,企业环境管理意识淡薄,生产废水监测不达标,环保设施运行台账不完善,危险废物管理不严格。庄浪金龙矿业公司未经环评审批擅自改扩建,未建环保设施,违法生产,给当地环境造成较大影响。	0	0	0	0	0	1	0	0	0	0	0	0	0	0
内蒙古自治区人民政府办公厅关于印发《内蒙古自治区本级职工基本医疗保险管理办法》等五个办法的通知[附：内蒙古自治区本级职工大额医疗保险管理办法、内蒙古自治区本级职工基本医疗保险费用结算办法、内蒙古自治区本级职工基本医疗保险转诊转院和特殊医疗项目检查及治疗管理办法、内蒙古自治区本级职工基本医疗保险个人账户及社会保障卡管理办法]	第七章附则 第十三条参保人员中断基本医疗保险关系6个月以内接续关系的,按00%的费率一次性补交中断期间的基本医疗保险费及滞纳金后,可继续享受基本医疗保险待遇,但不划个人账户,缴费年限可连续计算;超过6个月以上接续医疗保险关系的,按00%的费率一次性补交中断期间的医疗保险费及滞纳金,并设立一年准入期,缴费年限可连续计算,但不划个人账户,中断期间的医疗费用不予报销。	0	0	0	0	0	0	1	0	0	0	0	0	0	0
青海省人民政府关于印发青海省城镇居民基本医疗保险试点工作指导意见的通知	四、试点的基本内容 (二)基金筹集 1.筹资标准。年人均筹资标准为160元。个人缴费和各级政府补助资金按照以下标准执行: (1)18岁以下居民和全日制大中专院校在校学生每年每人缴纳80元,各级政府补助80元。其中省财政补助56元,州(地、市)、县(区、市)财政各补助12元,大中专院校在校生按隶属关系,分别由各级财政承担。 (2)19-59岁男性居民和19-54岁的女性居民每年每人缴纳110元,各级政府补助50元。其中省财政补助35元,州(地、市)、县(区、市)财政各补助00元。 (3)60岁以上男性居民和55岁以上女性居民每年每人缴纳60元,各级政府补助100元。其中省财政补助70元,州(地、市)、县(区、市)财政各补助15元。	0	0	0	0	0	0	0	0	0	0	1	0	1	0
广东省人民政府办公厅关于加快推进深化医药卫生体制改革政策落实的通知	五、加快完善紧密型医联体人财物管理机制。;00年6月底前,医疗集团和医疗共同体要制订内部的人财物管理办法。紧密型医联体内医务人员由牵头医院统筹使用,人员流动不受编制性质限制。紧密型医联体对基层医疗卫生机构财务实行统一领导、独立核算,资产实行统一管理,药品耗材实行集中采购、统一配送,允许牵头医院的院内制剂在紧密型医联体范围内流通使用。各地要加强对紧密型医联体的考核评价。	0	0	0	0	1	0	0	0	0	0	0	0	0	0
陕西省主要污染物总量减排监测办法	第七条省级环境保护主管部门负责组织对污染源监督性监测的统一质量控制和考核,并组织不定期抽查工作。 县级环境保护主管部门负责对污染源自动监测系统的监测设备进行实验室比对监测和自动监测数据有效性审核。县级环境保护主管部门不具备实验室比对监测和监测数据有效性审核能力的由市级以上环境保护部门承担。市级环境保护主管部门负责对国控和省控污染源自动监测系统的监测设备进行实验室比对监测和自动监测数据有效性审核,其中省级环境保护主管部门负责对装机容量30万千瓦以上火电厂和市级城市污水处理厂污染源自动监测系统的监测设备进行实验室比对监测和自动监测数据有效性审核。实验室比对监测与自动监测设备同步现场采样,监测频次为每季度一次。 实验室比对的监测结果与同步的自动监测的数据质量达不到规定时,则从本次实验室比对监测时间上推至上次实验室比对监测之间的时段按自动监测系统数据缺失处理,数据缺失时段的排放量按照相关技术规范…	0	0	0	0	0	0	1	0	0	0	0	0	0	0
国务院办公厅关于印发第二次全国污染源普查方案的通知	四、普查组织及实施 (五)宣传动员。 各级污染源普查领导小组办公室要按照国发〔2016〕59号文件要求,充分利用报刊、广播、电视、网络等各种媒体,广泛动员社会力量参与污染源普查,为普查实施创造良好氛围。	0	0	0	0	1	0	0	0	0	0	0	0	0	0
陕西省人民政府办公厅关于印发2013年度主要污染物总量减排实施方案的通知	四、工作机制与考核监督 5.;00年规模化养殖场和养殖小区治理化学需氧量、氨氮减排项目表(略)	0	0	0	0	0	0	0	0	0	0	0	0	0	1
内蒙古自治区人民政府关于水污染防治行动计划的实施意见	三、重点任务 (五)严格环境执法监管。 严厉打击环境违法行为。重点打击私设暗管或利用渗井、渗坑、溶洞排放、倾倒含有毒有害污染物废水、含病原体污水,监测数据弄虚作假,不正常使用水污染物处理设施,或者未经批准拆除、闲置水污染物处理设施等环境违法行为。对造成生态损害的责任者严格落实赔偿制度。严肃查处建设项目环境影响评价领域越权审批、未批先建、边批边建、久试不验等违法违规行为。对构成犯罪的,要依法追究刑事责任。完善自治区级巡查、盟市检查的环境监督执法机制,强化环保、公安、监察等部门和单位协作,健全行政执法与刑事司法衔接配合机制,完善案件移送、受理、立案、通报等规定。加强对各地区和各有关部门环保工作的监督。 完善水环境监测网络,提高环境监管能力。统一规划设置监测断面(点位)。提升饮用水水源水质全指标监测、水生生物监测、地下水环境监测、化学物质监测及环境风险防控技术支撑能力。加强环境监测、环境监察、…	0	0	0	0	1	0	1	0	0	0	0	0	0	0
吉林省人民政府办公厅转发省劳动保障厅等部门关于城镇居民基本医疗保险试点实施意见的通知	二、参保范围、缴费和补助、待遇保障 (五)待遇保障。城镇居民基本医疗保险重点保障参保居民的住院和门诊大病医疗;基本医疗保险统筹基金按照“以收定支、收支平衡、略有结余”的原则确定支付标准。 3.统筹基金支付比例。参保居民住院期间发生的符合规定的医疗费用,在起付标准以上,最高支付限额以下可采取费用分段、按不同医疗机构确定具体支付标准的方式进行支付。费用分段不得超过3段。统筹基金支付比例为30%-70%,平均支付比例不低于50%,门诊大病的统筹基金支付比例不低于50%。学生儿童发生的住院和门诊大病(包括意外伤害)医疗费用,统筹基金支付比例为50%-90%,平均支付比例不低于70%。	0	0	0	0	0	0	0	0	0	0	0	0	1	0
海南省人民政府办公厅关于印发海南省医药产业“十三五”发展规划指导意见的通知	三、主要任务 (二)加强技术创新,提高核心竞争力。 加强原研药、先进仿制药、新型制剂、南药、黎药、海洋药和智能医疗器械等创新能力建设。积极推动产品研发、检测、安全评价和临床研究公共服务平台建设,培育一批拥有特色技术、高端人才的创新型企业和科技创新基地,提高医药新产品研制能力。以群众用药、临床用药需求和提升全民健康目标为导向,在肿瘤、心脑血管疾病、精神性疾病、妇儿疾病、重大传染性疾病等领域,重点开发具有靶向性、高选择性、新作用机理的治疗药物,重点仿制市场潜力大、临床急需的国外专利到期药品。加快新型抗体、蛋白及多肽等生物药研发和产业化。针对儿童用药需求,开发符合儿童生理特征的新品种、剂型和规格。积极承担国家临床必须的、用量小、市场供应短缺的基本药物定点生产。推进中医药现代化,建立特色重点中药材品种规范化种植(养殖)标准体系,加强中药材、中成药生产、流通及使用追溯体系建设,提高中药产品质量和安…	1	0	0	1	0	0	0	0	0	0	0	1	0	0
山西省人民政府办公厅关于加快发展健身休闲产业的实施意见	五、加强健身休闲设施建设 (三)盘活用好现有体育场馆资源。制定相关政策保障措施,合理利用学校体育设施,节约集约土地资源,减少资源浪费。深化大型体育场馆运营管理改革试点,积极引入社会资本和现代公司化运营机制,努力探索所有权与经营权分离改革模式,盘活体育场馆设施资源。鼓励通过输出品牌、管理、资本、人才等方式开展市场化、专业化运营,打造一流的体育场馆运营管理企业。支持大型体育场馆闲置空间综合利用,完善大型体育场馆综合服务功能,拓展服务领域,提高综合效益。制定中小型体育场馆免费低收费开放政策和补贴政策。	0	0	0	1	0	0	0	0	0	0	1	1	1	0
江西省人民政府办公厅关于改革完善医疗卫生行业综合监管制度的实施意见	三、强化综合监管措施,加强全过程全行业监管 (十二)加强健康产业监管。建立健全覆盖健康产业全链条、全流程的包容、审慎、有效监管机制,明确监管责任,提高监测能力。制定完善新型健康服务监管政策,加强对医疗卫生与养老、旅游、互联网、健身休闲、食品、美容、产后康复等领域融合产生的新产业新业态新模式的监管,完善对相关新技术的审慎监管机制。通过规范试点、开展评估、公开信息、完善投诉和维权机制等多种方式,加强行业指导,营造公平公正的发展环境。加强对药品、医疗器械、康复辅助器具等相关产业的监管,提升相关支撑产业研发制造水平。(省卫生健康委、省委网信办、省发展改革委、省科技厅、省工业和信息化厅、省民政厅、省财政厅、省人力资源社会保障厅、省商务厅、省文化和旅游厅、省国资委、南昌海关、省税务局、省市场监管局、省广电局、省体育局、省医保局、江西银保监局、省药监局按职责分工分别负责)	0	0	0	0	0	0	1	0	0	0	0	0	0	0
河南省人民政府办公厅关于印发河南省2009年度主要污染物总量减排计划实施方案的通知	一、总则 (二)编制依据。 3.河南省环保局、发展改革委、财政厅《关于印发河南省2008-;00年环境自动监控系统建设规划的通知》(豫环文〔2008〕542号);1	0	0	0	0	0	0	1	0	0	0	0	0	0	0
吉林省人民政府办公厅关于印发吉林省深化医药卫生体制改革2012年主要工作安排的通知	三、保障措施 (四)强化宣传引导。 要坚持正确的舆论导向,健全部门、地方医改宣传沟通协调机制,加强主动引导和正面宣传,深入挖掘典型经验,采取贴近群众、深入基层的方式展示改革成效、扩大宣传效果。要及时发布医改进展情况,完善舆情核实机制,主动接受新闻媒体监督,解答和回应社会关心的问题。要调动各方参与医改的积极性、主动性和创造性,充分发挥医务人员主力军作用,为深化改革营造良好的舆论氛围和社会环境。	0	0	0	0	1	0	0	0	0	0	0	0	0	0
河南省人民政府办公厅关于转发河南省医药卫生体制五项重点改革2010年度主要工作安排的通知	二、工作任务 (五)推进公立医院改革试点。根据国家统一部署,洛阳市为国家首批公立医院改革试点城市。濮阳市、漯河市为我省公立医院改革试点城市。 4.调整公立医院布局和结构,完善管理体制。主要工作目标:(1)调整优化公立医院区域布局和结构,明确行政区域内公立医院的设置数量、布局、主要功能和床位规模、大型医疗设备配置。研究探索将部分公立医院转制为非公立医疗机构。(省卫生厅、中医管理局负责)(2)出台进一步鼓励和引导社会资本发展医疗卫生事业的意见,鼓励社会资本进入医疗服务领域。(省发展改革委、卫生厅、中医管理局、财政厅、商务厅、人力资源社会保障厅负责)(3)建立公立医院与城乡基层医疗卫生机构的分工协作机制,加强人员培训交流和业务指导,探索建立社区首诊、双向转诊等分级诊疗制度。(省卫生厅、中医管理局负责)(4)探索政事分开、管办分开的有效形式。完善医院法人治理结构。深化人事制度改革,推行聘用制和岗…	0	0	1	1	0	0	1	0	0	0	1	1	0	0
天津市人民政府批转市环保局、市发展改革委拟定的天津市"十一五"主要污染物总量减排考核办法的通知	第七条市环保局会同市发展改革、市监察和市统计部门对各区县人民政府和有关责任部门年度主要污染物总量减排完成情况进行核查,每年至少一次。	0	0	0	0	1	0	0	0	0	0	0	0	0	0
山西省人民政府关于印发山西省土壤污染防治工作方案的通知	四、组织实施 (二)推进信息公开,引导公众参与和社会监督。 1.加强社会监督。 (110)推进信息公开。由县级以上环保部门统一发布土壤环境状况信息,适时发布土壤环境质量公报。县级以上环保、农业、国土资源等部门要按照职责分工及时公布土壤环境监管信息。重点行业企业要依据国家环境信息公开有关规定,如实向社会公开其产生的重点监控污染物名称、排放方式、排放浓度、排放总量,以及污染防治设施建设和运行情况,接受社会监督。 牵头单位:省环保厅 参加单位:省国土资源厅、省住房城乡建设厅、省农业厅等	0	0	0	0	1	0	0	0	0	0	0	0	0	0
福建省人民政府关于建立全科医生制度的实施意见	六、相关保障措施 (二十八)合理规划全科医生的培养使用。由省卫生厅每年公布全省全科医生规范化培养基地名单及招生名额。建立全科医生信息库,掌握全科医生人员动态。	1	0	1	0	0	0	0	0	0	0	0	0	0	0
吉林省人民政府关于加快推进医药健康支柱产业发展的实施意见	三、保障措施 (一)加强组织领导,形成加快推进医药健康产业发展的合力。 3.加大政府引导性投入。省级医药产业发展引导资金重点扶持医药健康产业自主创新与重大技术提升项目。	0	1	0	0	0	0	0	0	0	0	0	0	0	0
吉林省人民政府办公厅关于印发吉林省建立和规范政府办基层医疗卫生机构基本药物采购机制实施办法(暂行)的通知	三、建立和规范基本药物采购机制的工作要求 (三)加强考核评估。省医改办公室要会同有关部门把基层医疗卫生机构采购基本药物情况作为医改工作评估的核心指标之一,对全省基本药物采购、配送、使用、监管等情况进行考核,并与资金补助挂钩。	0	0	0	0	0	0	0	0	0	0	0	0	1	0
云南省人民政府办公厅关于促进“互联网+医疗健康”发展的实施意见	二、主要任务 (一)以为民惠民为目标,让群众获取医疗健康服务更便捷 1.打造指尖医疗服务。鼓励医疗机构积极应用互联网技术,优化医疗服务流程,构建覆盖诊前、诊中、诊后的线上线下一体化医疗服务模式,为患者提供线上预约、智能导医分诊、就诊提醒、诊间结算、移动支付、检验检查结果查询、信息推送等便捷服务,提高医疗服务效率。到;00年底,全省二级及以上医院普遍能够提供互联网医疗服务。建设全省统一的预约诊疗平台,逐步实现号源集中统一共享,并优先向医疗联合体内基层医疗卫生机构预留预约诊疗号源,推动基层首诊,畅通双向转诊,解决“挂号难”问题。到;00年底,预约时段精确到1小时以内。依托“一部手机办事通”平台,为群众提供内容丰富、高效便捷的指尖医疗服务。(省卫生健康委、省医保局、省人力资源社会保障厅、省政务服务管理局负责,排在第一位的为牵头部门,下同)	1	0	0	0	0	1	0	0	0	0	0	0	0	0
内蒙古自治区人民政府关于水污染防治行动计划的实施意见	四、保障措施和要求 (三)围绕水质改善,筛选储备项目。 各地区、各相关部门要以解决水环境质量问题为导向,针对流域控制单元达标、饮用水水源保护等重点任务,本着实事求是的原则,认真组织好项目的筛选、储备、申报工作。对项目的前期材料准备、申报、实施、验收要进行全过程监管。同时明确资金来源、工程内容、完成时限和责任主体,实施精准管理,确保项目按期保质完成,发挥应有的环境效益。项目的资金来源以地方资金为主,引导和鼓励多种投融资方式。 各地区、各相关部门于;00年10月31日前将分年度实施项目清单及相关支撑材料(项目立项、环评审批等)报自治区水污染防治工作领导小组办公室。	0	1	0	0	1	0	0	1	0	0	0	0	0	0
天津市人民政府办公厅关于印发天津市支持社会力量提供多层次多样化医疗服务实施方案的通知	五、严格行业监管和行业自律 (二十)促进诚信经营。强化社会办医疗机构主体责任和自律管理,社会办医疗机构要公开诊疗科目、服务内容、价格收费等医疗服务信息,开展诚信承诺活动。建立健全医疗机构及从业人员信用记录,纳入全国信用信息共享平台,其中涉及企业的相关记录纳入国家企业信用信息公示系统,并依法推进信息公开。对严重违规失信者依法采取惩戒措施,提高失信成本。鼓励行业协会等第三方开展医疗服务信用评价。建立健全医疗机构监管信息常态化披露制度,卫生计生行政部门要定期公开医疗机构服务质量、违法违规行为查处情况,并通过国家企业信用信息公示系统向社会公示相关行政许可、行政处罚、“黑名单”、抽查检查结果等信息,对进入“黑名单”的机构和人员依法依规严肃处理,促进社会办医疗机构诚信经营。(责任部门:市卫生计生委、市市场监管委)	0	0	0	0	0	0	1	0	0	0	0	1	0	0
海南省人民政府办公厅关于印发海南省医药产业“十三五”发展规划指导意见的通知	医药产业是建立在惠民生保健康基础上的刚需行业。国家高度重视医药产业发展,明确提出发展医药产业是民生需要,同时也是经济社会发展的需要,要求把加快医药产业健康发展和深化医药卫生体制改革结合起来,更好地服务惠民生、稳增长。省委、省政府将医药产业确定为“十三五”重点发展的12个产业之一。我省开展省域“多规合一”试点,也为医药产业发展拓展了更大空间。但也面临产业综合竞争力偏弱、产业政策力度和准度不够、应对药品监管医改政策变化和产业模式变化能力不强等困难。	0	0	0	0	0	0	0	0	1	0	0	0	0	0
内蒙古自治区人民政府办公厅关于印发《内蒙古自治区本级职工基本医疗保险管理办法》等五个办法的通知[附：内蒙古自治区本级职工大额医疗保险管理办法、内蒙古自治区本级职工基本医疗保险费用结算办法、内蒙古自治区本级职工基本医疗保险转诊转院和特殊医疗项目检查及治疗管理办法、内蒙古自治区本级职工基本医疗保险个人账户及社会保障卡管理办法]	第七章附则 第四条外转参保患者确诊后回原定点医疗机构治疗,原定点医疗机构必须接收患者就诊治疗,但不得挂牌住院。	0	0	0	0	0	0	1	0	0	0	0	0	0	0
江西省人民政府关于建立全科医生制度的实施意见	六、为全科医生制度建设提供有力保障 (二十六)加强全科医生培养基地建设。在充分利用现有资源基础上,按照“填平补齐”原则,建设以三级综合医院和有条件的二级医院为临床培养基地,以有条件的社区卫生服务中心、乡镇卫生院和专业公共卫生机构为实践基地的全科医生培养实训网络。省卫生厅会同省教育厅等有关部门按照国家规定制定临床培养基地、实践基地的建设标准和管理办法。加强全科医学师资队伍建设,制定全科医学师资标准,依托有条件的高等医学院校建设区域性全科医学师资培训基地,重点支持基层实践基地师资的培训。	0	0	1	1	0	0	0	0	0	0	0	0	0	0
山西省人民政府关于推进健康中国·山西行动的实施意见	一、总体目标 到;00年,健康促进政策体系基本建立,全民健康素养水平稳步提高,健康生活方式加快推广,基本健康服务更加优质均衡,重大慢性病发病率上升趋势得到遏制,重点传染病、严重精神障碍、地方病、职业病得到有效防控,致残和死亡风险逐步降低,重点人群健康状况显著改善。到;00年,全民健康素养水平大幅提升,健康生活方式基本普及,健康服务能力大幅提升,居民主要健康影响因素得到有效控制,因重大慢性病导致的过早死亡率明显降低,人均健康预期寿命得到较大提高,居民主要健康指标水平总体上好于全国平均水平,健康公平基本实现。	0	0	0	0	0	1	0	0	0	0	0	0	0	0
重庆市人民政府关于印发重庆市畜禽养殖区域划分管理规定和重庆市畜禽养殖区域划分及养殖污染控制实施方案的通知	第一条为防治畜禽养殖业污染环境,促进我市畜禽养殖业健康发展,根据有关法律、法规规定,结合我市实际特制定本规定。	0	0	0	0	0	0	0	0	0	0	0	0	0	1
河南省人民政府办公厅关于印发河南省促进天使风投创投基金高质量发展实施方案河南省数字经济和生物医药新材料政府引导基金设立方案的通知	六、配套机制 省数字经济引导基金配套的管理办法、考核评价、收益让利、投资容错等实施细则,由省发展改革委会同有关部门另行制定。 河南省生物医药新材料政府引导基金设立方案 为大力招引优秀天使风投创投基金,带动社会资本投入生物医药新材料产业,助力企业培育、产业发展,特设立河南省生物医药新材料政府引导基金(以下简称省生物医药新材料引导基金)。	0	0	0	0	0	0	0	1	0	0	0	0	0	0
吉林省人民政府关于加快推进医药健康支柱产业发展的实施意见	二、重点推进工作 (一)做强现代中药产业。立足长白山中药材资源优势和产业基础,坚持增强优势、高端突破,积极推进中药材有效成分提取分离与深度开发,重点支持新药创制和中药大品种二次开发,加强中药材规范化生产,加快现代中药产业的优化升级。到;00年,现代中药产业实现销售产值2580亿元。 3.中成药大品种二次开发与产业化。围绕重大工艺改进、药效物质基础、质量标准、药效机制、临床再评价和药物经济学等内容研究,大力推进肺宁颗粒、丹蒌片等中成药大品种和名优中成药的二次开发与产业化,提升产品质量和核心竞争力。	0	0	0	0	0	0	0	0	1	0	0	0	0	0
宁夏回族自治区人民政府办公厅关于开展大气污染防治工作强化督查的通知	五、督查核查人员组成及任务分工 (六)自治区住房城乡建设厅负责检查城市集中供热工程建设,城市园林绿化,城市建筑、拆迁工地、建成区闲置或未开发的裸露空地扬尘防控,城市道路机械化洒水、清扫,建筑节能和供热计量等工作计划下达、督查检查情况。	0	0	0	0	1	0	0	0	0	0	0	0	0	0
西藏自治区人民政府办公厅转发民政厅等部门关于进一步完善城乡医疗救助制度全面开展重特大疾病医疗救助工作实施意见的通知	一、总体要求 (二)基本原则。 托住底线。坚持从我区经济社会发展水平的实际出发,按照救助对象医疗费用、家庭困难程度和负担能力等因素,科学合理予以救助,确保对象获得必需的基本医疗卫生服务。 统筹衔接。积极推进医疗救助制度城乡统筹发展,加强与基本医疗保险、大额医疗补充保险、疾病应急救助的有效衔接,形成制度合力。加强与慈善事业有序衔接,实现政府救助与社会力量参与的高效联动和良性互动。 公开公正。公开救助政策、工作程序、救助对象以及实施情况,主动接受群众和社会监督,确保过程公开透明、结果公平公正。 高效便捷。优化救助流程,简化结算程序,加快信息化建设,增强救助时效,发挥救急难功能,使困难群众及时得到有效救助。	1	0	0	0	0	1	0	0	0	0	0	1	0	0
甘肃省人民政府办公厅印发关于加快中医药特色发展若干措施的通知	三、实施中医医疗机构体系完善工程 (二)建立名医堂执业平台。依托中医药特色突出、中医药服务能力强、优势明显的中医医疗机构建立一批名医堂执业平台。国医大师、全国名中医、甘肃省名中医、岐黄学者、全国中医药师承教育指导老师等名医团队入驻名医堂的,实行创业扶持、品牌保护、自主执业、自主运营、自主培养、自负盈亏综合政策,打造一批名医团队运营的精品中医机构。鼓励和支持有经验的社会力量兴办连锁经营的名医堂,突出特色和品牌,打造一流就医环境,提供一流中医药服务。(省卫生健康委、省发展改革委、各市州人民政府、兰州新区管委会负责)	0	0	0	0	0	0	0	0	0	0	0	1	0	0
海南省人民政府办公厅关于调整城镇居民基本医疗保险有关政策的通知	一、关于筹资标准 区域统筹区各市、县成年人每人每年筹资标准为210元,其中,中央财政60元,省财政48元,市、县财政12元,个人缴费90元;未成年人每人每年筹资标准为150元,其中,中央财政60元,省财政48元,市、县财政12元,个人缴费30元。中央和省财政对海口市、三亚市参保对象分别按60元/人、18元/人给予补助。对城镇低保对象、重度残疾人和低收入家庭60周岁以上老年人的个人缴费部分财政全额补助,中央财政对学生和儿童按5元/人给予补助,对成年人按30元/人给予补助,余下的个人缴费部分从城市医疗救助资金中列支。 海口市、三亚市的筹资水平不低于区域统筹区各市、县的筹资水平,具体标准由当地政府自行制定。	0	0	0	0	0	0	0	0	0	0	0	0	1	0
甘肃省人民政府办公厅关于印发甘肃省突发公共事件医疗卫生救援应急预案的通知	甘肃省人民政府办公厅关于印发甘肃省突发公共事件医疗卫生救援应急预案的通知 (甘政办发[200830号) 各市、自治州人民政府,省政府有关部门,有关单位: 现将《甘肃省突发公共事件医疗卫生救援应急预案》予以印发,请认真贯彻执行。 甘肃省人民政府办公厅 二○○八年三月二十四日 甘肃省突发公共事件医疗卫生救援应急预案 目录 1总则 l.1编制目的 l.2编制依据 00适用范围 00工作原则 2事件分级 00特别重大事件(Ⅰ级) 00重大事件(Ⅱ级) 00较大事件(Ⅲ级) 00一般事件(Ⅳ级) 3组织体系 00救援领导小组及有关部门职责 00专家组 00救援机构 00现场救援指挥部 4应急反应和终止 00应急反应原则 00分级反应 00现场救援及指挥 5救援保障 00信息保障 00急救网络保障 00应急队伍保障 00应急物资保障 00救援经费保障 00交通运输保障 6公众参与 7附则 00责任与…	0	0	0	0	0	0	0	0	0	0	0	0	0	1
内蒙古自治区人民政府办公厅关于印发《内蒙古自治区本级职工基本医疗保险管理办法》等五个办法的通知[附：内蒙古自治区本级职工大额医疗保险管理办法、内蒙古自治区本级职工基本医疗保险费用结算办法、内蒙古自治区本级职工基本医疗保险转诊转院和特殊医疗项目检查及治疗管理办法、内蒙古自治区本级职工基本医疗保险个人账户及社会保障卡管理办法]	第一章总则 第五条自治区财政部门要加强对基本医疗保险基金的监督和管理;审计部门要定期对医保基金收支和管理情况进行审计;自治区卫生行政部门、药品监督部门要加强对定点医疗机构和定点零售药店的行政管理,积极推进医药卫生体制改革;自治区地税直属征收分局负责自治区本级医疗保险费的征缴。	0	0	0	0	1	0	0	1	0	0	0	0	0	0
福建省人民政府办公厅关于印发加强全民健身场地设施建设发展群众体育实施方案的通知	五、优化运营管理 (十四)完善开放扶持政策。修订完善公共体育场馆免费或低收费开放补助政策,支持体育场馆向社会免费或低收费开放。受补助的公共体育场馆可为体育社会组织提供办公场所,并明确租金优惠比例。鼓励符合条件的企事业单位健身设施向社会开放。 责任单位:省财政厅、体育局、机关事务管理局	0	0	0	0	0	0	0	0	0	0	0	0	1	0
国务院办公厅关于印发深化医药卫生体制改革2014年重点工作任务的通知	重点解决筹资机制不健全、重特大疾病保障机制不完善、医疗服务监管尚需加强、支付方式改革有待深化等问题,进一步巩固完善全民医保体系。;00年职工基本医疗保险、城镇居民基本医疗保险(以下简称城镇居民医保)和新型农村合作医疗(以下简称新农合)三项基本医保参保(合)率稳定在95%以上,城镇居民医保和新农合人均政府补助标准提高40元,达到320元;个人缴费同步新增20元。城镇居民医保和新农合政策范围内住院费用支付比例分别达到70%以上和75%左右,进一步缩小与实际住院费用支付比例之间的差距。适当提高城镇居民医保和新农合门诊统筹待遇水平。重点任务是:	0	0	0	0	0	1	0	0	0	0	0	0	1	0
吉林省人民政府办公厅转发省劳动保障厅等部门关于城镇居民基本医疗保险试点实施意见的通知	三、管理和服务 (七)基金管理与监督。 4.各统筹地区应当建立由政府有关部门代表、医疗机构代表、有关专家和人员等参加的社会监督组织,加强对城镇居民基本医疗保险基金的社会监督。	0	0	0	0	1	0	0	0	0	0	0	0	0	0
海南省人民政府办公厅关于印发海南省医药产业“十三五”发展规划指导意见的通知	三、主要任务 (五)加大营销力度,培育大品种。 抓住国家持续推进医改、完善医疗保障体系的有利契机,支持企业深入研究市场需求,着力做大优势品种、大品种,加大重点产品的宣传和推广,进一步扩大、做实成熟市场,拓展新兴市场,不断增强海南品种市场竞争力。 图表1:“十三五”期间培育10亿元以上、5~10亿元目标品种 图表2:“十三五”期间培育1~5亿元以上目标品种 图表3:“十三五”期间预计获批新投产重点品种	0	0	0	0	1	0	0	0	0	0	0	0	0	0
浙江省人民政府办公厅转发省劳动保障厅、省财政厅关于浙江省国家公务员医疗补助实施意见的通知	三、医疗补助的筹资标准 筹资标准应根据当地两年公费医疗的实际支出(剔除不合理支出部分)、基本医疗保险的筹资水平以及财政的承受能力等情况合理确定。 国家公务员医疗补助筹资标准的确定和调整应适当考虑社会经济发展、物价变动、医疗费用的自然增长和国家公务员个人的承受能力等因素。	0	0	0	0	0	0	0	0	0	0	0	1	1	0
吉林省人民政府办公厅关于转发省劳动保障厅制定的《吉林省省直机关事业单位参加基本医疗保险人员医疗救助办法(试行)》的通知	第十一条省医疗保险经办中心每年将省直医疗救助资金使用情况向省医疗保险制度及医药卫生体制改革:工作领导小组报告,并通报省直各有关单位。	0	0	0	0	1	0	0	0	0	0	0	0	0	0
上海市人民政府关于印发《上海市全民健身实施计划(2011－2015)》的通知	六、组织实施 (二)区县政府要根据本计划,结合当地实际情况,制定本区域的全民健身实施计划。各区县政府每年就实施计划情况进行检查考核。区县体育部门在政府任期届满时,将全民健身实施情况及评估结果报告区县政府和市体育部门。	0	0	0	0	1	0	0	0	0	0	0	0	0	0
国务院关于江苏省镇江市、江西省九江市职工医疗保障制度改革试点方案的批复	第五章 第二十九条 职工就医时,定点医院必须复制一份处方和住院医嘱送达医疗保险机构备查。	0	0	0	0	0	0	1	0	0	0	0	0	0	0
内蒙古自治区人民政府办公厅关于印发自治区2016年度大气污染防治实施计划的通知	三、保障措施 (四)严格考核奖惩 1.;00年12月底698呼和浩特市新城区呼和浩特市福利供热有限公司(际华五三零三)生活供热41436拆并/改气00.08841	0	0	0	0	0	0	0	0	0	0	0	0	0	1
陕西省人民政府办公厅关于印发第一次全省污染源普查方案的通知	二、普查时点、对象、范围和内容 (三)普查内容。 1.工业源。 (1)企业的基本登记信息及其他相关情况,包括企业排污口情况、排水去向等; (2)原材料消耗情况,包括水的使用和消耗量,能源(煤、油、电、气等)结构和消耗量,燃料含硫量,主要有毒有害原辅材料消耗量等; (3)生产产品情况,包括该企业主要产品的种类、产量等; (4)产生污染的设施情况,包括排放大气污染物的锅炉、窑炉等设施,产生废水、固体废物的设施,以及这些设施的种类、数量和规模; (5)各类污染物产生、治理、排放、综合利用情况,各类污染治理设施建设、运行及投入情况等; (6)污染物排放监测情况,包括监测点位、时间、频次,污染物种类和排放浓度、排放量等。	0	0	0	0	1	0	0	0	0	0	0	0	0	0
江苏省政府办公厅关于改革完善全科医生培养与使用激励机制的实施意见	三、保障措施 (二)强化医保政策支持。医保基金要加大对全科医生和签约服务的政策倾斜力度,将符合规定的签约服务项目以及延伸处方、慢性病长处方、家庭病床等新增项目纳入医保支付范围,使医保基金支付给基层医疗卫生机构的比例与参保人员在基层就医比例保持同步增长。鼓励依托基层医疗卫生机构推行门诊统筹按人头付费,探索将签约居民的门诊基金按人头支付给基层医疗卫生机构或家庭医生团队,对于经基层向医院转诊的患者,由基层医疗卫生机构或家庭医生团队支付一定的转诊费用。对纵向合作的医疗联合体等分工协作模式可实行医保总额付费,并加强考核,合理引导双向转诊,发挥全科医生和家庭医生团队在医保费用控制中的“守门人”作用。	0	0	0	0	0	0	0	1	0	0	0	0	0	0
关于印发《湖南省建立健全现代医院管理制度实施方案》的通知	二、建立健全医院治理体系 (二)落实医院经营管理自主权。深化医疗领域“放管服”改革,合理界定政府作为公立医院出资人的举办监督职责和公立医院作为事业单位的自主运营管理权限,实行所有权与经营权分离。公立医院要依法依规进行经营管理和提供医疗服务,行使内部人事管理、专业技术机构设置、中层干部聘任、人员招聘和人才引进、内部绩效考核与薪酬分配、年度预算执行等经营管理自主权,切实加强对内设机构、中层干部和医务人员的监管。落实公立医院用人自主权,公立医院在编制总量内根据业务需要面向社会自主公开招聘医务人员,对紧缺、高层次人才可按规定采取考察的方式予以招聘。进一步改进艰苦边远地区公立医院人员招聘工作,由公立医院合理设置招聘条件,同级人力资源社会保障和卫生计生行政部门审核后,及时招聘人员。(市州、县市区人民政府,省卫生计生委、省财政厅、省编办、省人力资源社会保障厅、省中医药管理局分别负责)	0	0	1	0	1	0	0	0	0	0	0	0	0	0
甘肃省人民政府办公厅关于2012年上半年省政府环保目标责任书落实情况及污染减排工作进展情况的通报	一、省政府环保目标责任书进展情况 (四)工作保障目标。 1.环保经费保障情况。各市州按要求将污染防治、环境监督执法、环境监测和信息、环境宣传教育、放射性和危险废物管理等纳入财政预算管理,各类项目专项配套资金基本落实。	0	1	0	0	0	0	1	0	0	0	0	0	0	0
辽宁省人民政府办公厅关于印发辽宁省城乡居民大病保险实施方案的通知	二、提高保障水平 大病保险要与城乡居民基本医保制度相衔接,参保人因患大病而发生的高额医疗费用,城乡居民基本医保按规定支付后,由大病保险对个人负担的合规医疗费用给予保障。大病保险的起付线标准、支付比例、支付范围等基础性政策实行全省统一。 城镇居民大病保险起付线以个人年度累计负担的合规医疗费用超过上一年度各市城镇居民人均可支配收入的50%确定,并根据城镇居民收入变化情况进行动态调整。农村低保对象、特困供养人员(五保对象)、低保边缘家庭成员等贫困居民大病保险起付线调至上一年度农民人均纯收入的60%,积极推动有条件的市探索将参合农民大病保险起付线调至上一年度农民人均纯收入的60%,到“十三五”末期最终实现全省农村全部参合农民大病保险起付线调至农民人均纯收入的60%以内。	0	0	0	0	1	0	0	0	0	0	0	0	0	0
国务院办公厅关于印发深化医药卫生体制改革2019年重点工作任务的通知	一、研究制定的文件 9.制定建立完善老年健康服务体系的指导意见。 (国家卫生健康委负责,;00年9月底前完成)	0	0	0	0	0	1	0	0	0	0	0	0	0	0
青海省人民政府关于印发青海省城镇居民基本医疗保险试点工作指导意见的通知	四、试点的基本内容 (一)保障方式和参保对象 1.保障方式。住院统筹与门诊统筹相结合,以补助住院医药费用为主,适当补助门诊医药费用。	0	0	0	0	0	0	0	0	0	0	0	0	1	0
湖南省人民政府办公厅关于印发《湖南省重污染天气应急预案》的通知	7.总结评估应急响应终止后需对重污染天气应急响应情况进行总结、评估。预警解除后5个工作日内,相关市州重污染天气应急组织机构要将本行政区域内重污染天气应对情况以书面形式报送省指挥中心办公室,总结评估报告应包括重污染天气应急响应启动情况、采取的措施、取得的成效、发现的问题、污染物应急减排比例等,并针对存在的突出问题提出改进措施等。监测达到黄色预警启动条件而未启动预警的市州也应于5个工作日内报送书面报告。区域联动预警或省级预警解除后,省指挥中心办公室视情组织相关市州人民政府和专家组对重污染天气应对工作进行总结评估,评估报告上报省指挥中心。	0	0	0	0	1	0	0	0	0	0	0	0	0	0
海南省人民政府办公厅关于印发海南省区域统筹区城镇居民基本医疗保险实施办法的通知	第七章奖惩 第三十二条社会保险经办机构及其工作人员有下列行为之一的,由相关部门按有关规定处理;涉嫌犯罪的,移交司法机关处理: (四)擅自更改参保人待遇的;	0	0	0	0	0	0	1	0	0	0	0	0	0	0
甘肃省人民政府办公厅关于印发甘肃省医药卫生体制五项重点改革2011年度主要工作安排的通知	二、工作任务 (三)健全基层医疗卫生服务体系。 9.转变基层医疗卫生机构服务模式,提高服务质量和效率。 (1)鼓励基层医疗卫生机构开展主动服务、上门服务和巡回医疗。鼓励有条件的地方建立全科医生团队,推进家庭签约医生服务,为辖区居民提供方便、连续的健康管理服务。在基层医疗卫生机构大力推广中医药等适宜技术和服务。(省卫生厅负责) (2)大力推行院长(主任)负责制,落实管理责任,提高管理效率。结合基层医疗卫生机构信息化建设,推行规范化、精细化管理,运用基本药物临床应用指南和处方集,规范基层用药和医疗行为,在基层医疗卫生机构全面开展医务人员“四个排队”(将医师用药量、抗菌素使用量、患者自费药使用量、青霉素占抗生素比例进行排队)和医疗机构“八个排队”(将医疗机构中医药收入占总收入比例、门诊输液人次占门诊总人次比例、平均住院费用、平均门诊费用、平均单病种(单次检查)费用、平均住院自费比例、大型设备检…	0	0	0	0	1	0	0	0	0	0	0	0	0	0
云南省人民政府办公厅关于印发云南省深化医药卫生体制改革2014年重点工作任务的通知	二、重点任务 (四)巩固完善基本药物制度和基层运行新机制 4.巩固完善基本药物制度。全面实施国家基本药物目录(;00年版),严格执行国家基本药物各项政策,充分考虑基层用药需求,并以二三级公立医院用药相衔接,规范调整我省基本药物补充药品目录。政府办的基层医疗卫生机构全部配备使用基本药物,提高二三级医院基本药物使用比例。完善政策措施,有序推进村卫生室和非政府办基层医疗卫生机构逐步实行基本药物制度。进一步规范基本药物招采配送机制,把是否通过《药品生产质量管理规范(;00年修订)》(GMP)认证作为质量评价的重要指标。加强基本药物的配送和回款管理,推广省药品集中采购平台直接面对基层医疗卫生机构采购结算的“点对点”采购模式,提高配送效率。严格落实市场清退制度,对采购合同履约不到位、配送不及时的企业加大处罚力度,保障基层用药需求。年内开展1-2次基本药物供应配送督查,确保每次覆盖面不小于30%,并及…	0	0	0	0	1	0	1	0	0	0	0	0	0	0
江西省人民政府办公厅关于印发江西省药品安全突发事件应急预案的通知	1.事件调查组。由省药监局牵头,省卫生健康委、省公安厅等部门组成。负责对引发事件的医疗行为、事件发生的原因和药品质量进行全面调查,提出调查结论和处理意见;组织对相关药品进行监督抽样和应急检验。	0	0	0	0	1	0	0	0	0	0	0	0	0	0
吉林省人民政府办公厅转发省劳动保障厅等部门关于城镇居民基本医疗保险试点实施意见的通知	三、管理和服务 (七)基金管理与监督。 2.建立风险储备基金。各统筹地区按城镇居民基本医疗保险统筹基金收入2%-5%的比例,从当年统筹基金结余中提取风险储备金,风险储备金规模保持在统筹基金年收入的15%,达到规模不再继续提取。风险储备基金作为专项储备资金,主要用于弥补特殊情况下出现的基金支付风险,一般情况下不得动用风险储备金,如确需使用应由经办机构提出申请,经同级劳动保障、财政部门审核,报当地政府批准并报上级劳动保障和财政部门备案后执行。	0	0	0	0	0	0	0	1	0	0	0	0	0	0
新疆维吾尔自治区人民政府办公厅关于印发自治区深化医药卫生体制五项重点改革2010年度主要工作安排的通知	二、工作任务 (一)加快推进基本医疗保障制度建设。 3.提高基本医保基金管理水平。主要工作目标: (2)推行按人头付费、按病种付费、总额预付等支付方式。选择50种左右临床路径明确的疾病开展按病种付费试点。按临床路径管理和试点方案要求,在试点医院和新农合定点医疗机构选择重点病种开展按病种付费试点。探索建立医疗保险经办机构与医疗机构、药品供应商的谈判机制,发挥医疗保险对医疗服务和药品费用的制约作用。(人力资源和社会保障厅、卫生厅分别负责)	0	0	0	0	0	0	0	0	0	0	1	1	0	0
关于印发《湖南省建立健全现代医院管理制度实施方案》的通知	三、完善医院管理制度 (九)健全基本建设和后勤管理制度。坚持规划引领,强化医院发展建设规划编制和项目前期论证,明确医院发展定位、总体布局、床位规模、功能分区、资源配置,严格按规划分步实施建设。建立基建目标和责任全过程管理制度,落实基本建设项目法人责任制、招标投标制、合同管理制、工程监理制、质量终身制等,按照基建投资计划和财务规定严格执行基本建设程序。合理配置适宜医学装备,大型医用设备配置符合国家卫生健康主管部门制定的大型医用设备配置规划,与其功能定位、临床服务需求相适应,优先选择国产医用设备耗材,建立信息化环境下的医院设备、物资、物流精细化管理制度和采购、使用、维护、保养、处置全生命周期管理制度。积极探索“后勤一站式”服务模式,逐步实行后勤服务社会化。	0	0	0	1	0	0	0	0	0	0	0	0	0	0
关于支持社会办医疗机构参与县域医疗卫生服务共同体建设的若干意见	四、促进医共体模式下的第三方服务机构发展。按照细分服务领域、扩大有效供给和培育专业化优势的要求,遵循提升规模效益、降低运营成本和促进同质管理的原则,支持社会力量在县域内建设第三方服务机构,鼓励医共体向具有相应资质的第三方服务机构购买服务,为医共体提供医学检验、医学影像、病理诊断、消毒供应、后勤保障等服务。培育发展面向患者的非医疗转运、住院陪护、生活服务等第三方服务新业态。充分利用第三方服务机构的平台资源和专业优势,鼓励参与技术标准和行业规范的制定,提升相关专业领域质控水平,促进相关服务管理同标同质,推动区域检查、检验结果等互认共享。	0	0	0	0	0	0	0	0	0	1	0	1	0	0
吉林省人民政府办公厅关于推进医疗卫生与养老服务融合发展的实施意见	三、政策措施 (十二)完善财政补贴扶持政策。各地政府要多渠道筹措资金,对符合养老机构设立条件的医养结合机构给予适当支持。社会力量兴建的老年型医疗机构,享受社会资本办医的优惠扶持政策。单独设置康复功能的城市社区日间照料中心、居家养老服务中心、农村养老服务大院和农村社会福利服务中心视情况给予适当资助。(省财政厅牵头,省民政厅、省卫生计生委配合)	0	0	0	0	0	0	0	0	0	0	0	1	1	0
河北省人民政府办公厅关于推进医疗保障基金监管制度体系改革的实施意见	三、创新方式,健全严密有力的基金监管制度体系 (一)健全监督检查制度。推行“双随机、一公开”监管机制,完善日常巡查、专项检查、飞行检查、交叉检查、重点检查、专家审查等相结合的多形式检查制度。检查采取现场检查和非现场检查等方式进行。对群众举报投诉、媒体曝光和其他部门移交的线索进行重点检查。规范执法权限、程序和处罚标准,最大限度减少自由裁量权。积极引入信息技术服务机构、会计师事务所、商业保险机构等第三方力量参与医保基金监管,建立和完善政府购买服务制度,推行按服务绩效付费,提升监管的专业性、精准性、效益性。(责任单位:省医疗保障局、省市场监管局、省财政厅)	0	0	0	0	0	0	1	0	0	0	0	0	0	0
黑龙江省人民政府办公厅关于印发黑龙江省建立现代医院管理制度实施方案的通知	一、总体要求 (一)指导思想。以习近平新时代中国特色社会主义思想为指导,全面贯彻落实党的十九大和全国卫生与健康大会精神,认真落实省第十二次党代会及省委十二届二次全会精神,坚持党的领导,坚持以人民健康为中心,坚持公立医院的公益性,坚持政事分开、管办分开,坚持分类指导、探索创新,实现医院治理体系和管理能力现代化,为推进健康龙江建设奠定坚实基础。	0	0	0	0	0	1	0	0	0	0	0	0	0	0
江苏省人民政府办公厅关于进一步完善医疗救助制度的实施意见	五、健全保障机制 (三)健全结算管理机制。各地要以基本医疗保险信息系统为支撑,进一步健全医疗救助与基本医疗保险、城乡居民大病保险、疾病应急救助、商业保险等信息共享、支付同步、公开透明的“一站式”结算平台。要进一步完善“一站式”结算平台医疗救助模块功能,实时掌握医疗救助对象医疗费用情况、各类医疗保险支付情况、医疗救助实施情况等信息,提升数据统计分析能力,为救助政策制定、救助资金监管等提供数据支持。要进一步强化“一站式”结算平台对象管理,符合救助条件的新增对象在审批当月应当及时纳入结算平台,尽快实现医疗救助对象全部纳入“一站式”结算平台管理。要进一步推进医疗救助异地结算工作,力争实现与基本医疗保险同时同步开通异地就诊即时结算。	1	0	0	0	0	0	0	0	0	0	0	0	1	0
山西省人民政府关于开展城镇居民基本医疗保险试点的实施意见	三、加强管理和服务 (三)服务管理。对城镇居民基本医疗保险的医疗服务管理,原则上参照城镇职工基本医疗保险的有关规定执行,具体办法由试点城市劳动保障部门会同发展改革、财政、卫生等部门制定。要综合考虑参保居民的基本医疗需求和基本医疗保险基金承受能力等因素,合理确定医疗服务的范围,通过订立和履行定点服务协议,规范对定点医疗机构和定点零售药店的管理,明确医疗保险经办机构和定点的医疗机构、零售药店的权利和义务。医疗保险经办机构要简化审批手续,方便居民参保和报销医疗费用;明确医疗费用结算办法,按规定与定点医疗机构及时结算医疗费用。加强对医疗费用支出的管理,探索建立医疗保险管理服务的奖惩机制。积极推行医疗费用按病种付费、按总额预付等结算方式,探索协议确定医疗费用标准的办法。	0	0	0	0	0	0	1	0	0	0	0	0	0	0
内蒙古自治区人民政府办公厅关于印发自治区国民营养计划(2017—2030年)实施方案的通知	二、完善实施策略 (七)普及营养健康知识。 5.15”全国碘缺乏病防治日等为契机,大力开展科普宣教活动,持续开展营养宣传进社区、进学校等活动,有效带动宣教活动常态化,积极营造营养宣传良好氛围。推动将国民营养、食品安全知识知晓率纳入健康城市和健康村镇考核指标。建立营养、食品安全科普示范工作场所,如建立营养食堂、营养和食品安全科普小屋、营养校园及健康企业等。定期开展科普宣传的效果评价,及时指导调整宣传内容和方式,增强宣传工作的针对性和有效性。开展舆情监测,回应社会关注,合理引导舆论,为公众解疑释惑。	0	0	0	0	1	0	0	0	0	0	0	0	0	0
山东省人民政府办公厅认真贯彻落实《关于进一步深化基本医疗保险支付方式改革的指导意见》的通知	四、切实强化各项保障措施 (三)加强宣传,正确引导。要坚持正确的舆论导向,充分调动各方参与医保支付方式改革的积极性、主动性和创造性。加强与新闻媒体的沟通,主动宣传医保支付方式改革取得的进展及成效,及时回应社会关切,为进一步深化医保支付方式改革营造良好的舆论氛围和社会环境。 各市要按照《指导意见》和本通知精神,因地制宜开展相关改革工作,于;00年5月底前制定具体改革实施方案,并报省人力资源社会保障厅备案。 山东省人民政府办公厅 ;00年3月27日	0	0	0	0	1	0	0	0	0	0	0	0	0	0
浙江省人民政府关于十二五时期重污染高耗能行业深化整治促进提升的指导意见	三、主要任务 (五)严格执法检查。 1.开展专项检查。各级政府要组织开展专项检查,查清6大重点行业企业基本情况,并视情作出处理:对无合法环保手续的企业,依法查处,对未补办手续的,不得恢复生产。对卫生防护距离不达标、造成严重污染事故的企业,以及不能稳定达标排放的企业,依法实施限期治理,逾期未完成治理任务的,依法责令停产、关闭。对拒不履行停产整治、责令关闭等决定继续违法生产的企业,依法采取行政强制措施或实施行政强制执行。对依法关闭的企业,各相关部门应及时依法吊销其营业执照和生产许可证等证照。	0	0	0	0	0	0	1	0	0	0	0	0	0	0
重庆市人民政府办公厅关于转发市教委市卫生健康委重庆市加快医学教育创新发展实施方案的通知	二、主要任务 (一)全面优化医学人才培养结构。提升医学专业学历教育层次,大力加强医学学科建设,加大全科医学人才培养力度,加快构建高水平公共卫生人才培养体系,加快高层次复合型医学人才培养。	0	0	1	0	0	0	0	0	0	0	0	0	0	0
广西壮族自治区人民政府办公厅关于印发广西促进“互联网+医疗健康”发展实施方案的通知	二、建立健全“互联网+医疗健康”支撑体系 (十一)推动“互联网+”医疗服务流程优化再造。 1.大力发展基于信息技术的医疗服务流程优化再造,改善医疗服务,加快实现网上预约挂号、预约分诊、移动支付、诊间结算、药品物流配送、检查检验报告推送等信息化惠民便民服务。到;00年,二级以上医院普遍提供分时段预约诊疗、智能导医分诊、候诊提醒、检验检查结果查询、诊间结算、移动支付等线上服务。有条件的医疗卫生机构可以开展移动护理、生命体征在线监测、智能医学影像识别、家庭监测等服务。(责任单位:自治区卫生计生委)	1	0	0	0	0	0	0	0	0	0	0	0	0	0
湖北省人民政府办公厅关于印发加快全省医学教育创新发展实施方案的通知	二、重点任务 (二)全力提升院校医学人才培养质量。 1.传承创新发展中医药教育。注重强化中医药专业在中医药院校中的主体地位,集中优势资源做大做强中医药主干专业。支持湖北中医药大学建设国内一流学科和国家中医药高层次人才培养基地。鼓励湖北中医药高等专科学校等面向基层培养中医药人员。(省教育厅牵头,省卫健委、省发改委、省财政厅、省人社厅、省中医药管理局配合)	0	0	1	1	0	0	0	0	0	0	0	0	0	0
辽宁省人民政府办公厅关于印发《政府办基层医疗卫生机构基本药物集中采购实施办法(试行)》的通知	第三章集中采购 第十六条采购中心通过集中采购确定供货企业后,供货企业要将拟供货的药品样品送省食品药品监管部门备案。省食品药品监管部门要加强对基本药物质量的抽验,对质量出现问题的按照有关规定惩处,并及时向社会公布。	0	0	0	0	0	0	1	0	0	0	0	0	0	0
河南省人民政府办公厅转发关于将在校大学生纳入城镇居民基本医疗保险范围实施意见的通知	河南省人民政府办公厅转发关于将在校大学生纳入城镇居民基本医疗保险范围实施意见的通知 (豫政办〔2009〕126号) 各省辖市人民政府,省人民政府各部门: 省人力资源和社会保障厅、教育厅、财政厅、卫生厅、民政厅制定的《关于将在校大学生纳入城镇居民基本医疗保险范围的实施意见》已经省政府同意,现转发给你们,请认真贯彻执行。 河南省人民政府办公厅 二○○九年七月三十一日 关于将在校大学生纳入城镇居民基本医疗保险范围的实施意见 (省人力资源和社会保障厅、省教育厅、省财政厅、省卫生厅、省民政厅二○○九年七月三日) 根据《国务院办公厅关于将大学生纳入城镇居民基本医疗保险试点范围的指导意见》(国办发〔2008〕119号)精神,为做好我省高等院校在校大学生参加城镇居民基本医疗保险工作,结合我省实际,提出以下实施意见。	0	0	0	0	0	0	0	0	0	0	0	0	0	1
广东省人民政府关于印发“十二五”期间深化医药卫生体制改革实施方案的通知	五、统筹推进相关领域改革,全面优化医药卫生改革工作格局 (九)健全医药卫生监管体制。 8.根据改革进展和实践,及时将医改的成功做法、经验和政策上升为地方性法规或政府规章,推动基本医疗卫生制度地方立法,巩固改革成果,加强法制保障。(由省卫生厅、中医药局、法制办、人力资源社会保障厅、物价局负责)	0	0	0	0	0	0	1	0	0	0	0	0	0	0
广东省人民政府办公厅关于印发广东省深化医教协同进一步推进医学教育改革与发展实施方案的通知	一、改革目标 到;00年,全省医学教育管理体制机制改革取得突破,医学人才使用激励机制得到完善,以“5+3”(;00年临床医学本科教育+;00年住院医师规范化培训或;00年临床医学硕士专业学位研究生教育)为主体、“3+2”(;00年临床医学专科教育+;00年助理全科医生培训)为补充的临床医学人才培养体系基本建立。全省医学教育的规模和结构进一步优化,全科、儿科、精神科等紧缺人才培养得到加强,公共卫生、药学、护理、康复、医学技术等人才培养协调发展,办学水平和人才培养质量进一步提升,对卫生与健康事业的支撑作用明显增强。 到;00年,建成我国南方重要的医学教育高地,标准化、规范化医学人才培养体系更加健全,医学人才队伍满足我省卫生与健康事业发展需求,更好地服务健康广东和卫生强省建设。	0	0	1	0	0	1	0	0	0	0	0	0	0	0
辽宁省人民政府办公厅转发省人力资源社会保障厅等部门关于推进城镇基本医疗保险市级统筹工作意见的通知	四、工作要求 (二)各司其职,分工负责,加快推进市级统筹工作。在推进市级统筹工作中,各市和各有关部门要各司其职,密切配合,共同推进工作进展。 1.人力资源社会保障部门负责研究制定单独统筹县(市、区)纳入市级统筹的有关政策、办法,做好市、县(市、区)政策衔接、综合协调和业务管理工作,确保基金安全、人员连续参保和待遇正常发放,实现平稳过渡。	0	0	0	0	1	0	0	0	0	0	0	0	0	0
山东省人民政府关于山东省淮河流域水污染防治工作目标责任书(2005－2010年)执行情况的通报	一、今年以来《淮河治污责任书》执行情况 (四)环境综合整治情况。 4.城镇生活污水集中处理率。 淮河流域已建成污水处理厂的19个县(市、区)中,城镇生活污水集中处理率达到70%以上的有10个县(市、区),达到60%-70%以上的5个,济宁市任城区、微山县、莒南县、临沭县城镇生活污水集中处理率不足60%。	0	0	0	0	0	0	0	0	0	0	0	0	0	1
河南省人民政府办公厅关于贯彻落实国办发〔2013〕80号文件精神做好深化医药卫生体制改革工作的实施意见	二、工作任务 (二)巩固完善基本药物制度和基层医疗卫生机构运行新机制。 1.健全稳定长效的多渠道补偿机制。落实财政对基层医疗卫生机构运行的补助政策,将基层医疗卫生机构经常性收支差额补助纳入财政预算并及时足额落实到位。保障基本公共卫生服务经费专款专用,不得截留、挪用或挤占。全面实施一般诊疗费政策。发挥医保支付的补偿作用。(省财政厅、卫生厅、人力资源社会保障厅、发展改革委负责)	0	0	0	0	0	0	0	0	0	0	0	0	1	0
重庆市人民政府办公厅关于印发2017年大气污染防治重点工作目标任务分解的通知	六、增强监管能力 开展科学研究 49.按照国家要求,持续开展PM00、PM 10.臭氧污染来源解析,与重点污染源清单形成总量、减量、容量的对应关系,滚动推进,季度更新。 市环保局 有关区人民政府,市发展改革委、市科委	1	0	0	0	0	0	0	0	0	0	0	0	0	0
西藏自治区人民政府办公厅关于进一步加强乡村医生队伍建设的实施意见	二、乡村医生职责 (一)公共卫生服务工作。在乡(镇)卫生院指导下,按照服务标准和规范开展预防接种、传染病防治、儿童保健、孕产妇保健、健康管理、计划生育技术服务、健康教育、重点疾病管理等基本公共卫生服务工作;协助上级专业公共卫生机构落实重大公共卫生服务项目,按规定及时报告传染病疫情和中毒事件,协助处置突发公共卫生事件等。	0	0	0	0	1	0	0	0	0	0	0	0	0	0
山东省卫生健康委员会等部门关于印发《山东省公立医疗机构药品采购推行“两票制”实施方案》的通知	五、监督管理 (三)工业和信息化部门要加强医药工业行业管理,鼓励医药企业开展创新药物研发,引导医药企业实施产品升级,推进医药产业健康发展。	1	0	0	0	0	0	0	0	0	0	0	1	0	0
福建省卫生和计划生育委员会、福建省深化医药卫生体制改革领导小组办公室关于印发福建省进一步改善医疗服务行动实施方案的通知	一、临床路径清晰、风险可控的中、小型择期手术,推行日间手术,提高床位周转率,缩短住院手术等候时间。对病情稳定的放、化疗患者,实行日间治疗。医保部门应将日间治疗有关费用纳入医保报销范畴。 (七)规范诊疗行为,落实行为规范 3.落实医疗行风建设“九不准”。加强医德医风教育,培养良好的职业情操,落实医德医风考评、医师定期考核和不良行为记录等制度。宣传先进典型,开展警示教育,严肃查处红包、回扣等行为。通过宣传教育和制度建设,形成良好的工作机制,使广大医务人员形成拒收红包、回扣良好风尚。	0	0	0	0	0	0	1	0	0	0	0	0	0	0
江苏省残疾预防和残疾人康复实施办法	第一章总则 第四条县级以上地方人民政府领导残疾预防和残疾人康复工作,建立政府主导、部门协作、社会参与、家庭支持的预防和康复机制,实行工作责任制,对有关部门承担的残疾预防和残疾人康复工作进行考核和监督。 县级以上地方人民政府残疾人工作委员会负责组织、协调、指导、督促残疾预防和残疾人康复工作,制定相关政策、规划、计划并组织实施,推动解决重大问题。 县级以上地方人民政府卫生健康、民政、财政、人力资源社会保障、教育、公安、应急管理等部门按照各自职责做好残疾预防和残疾人康复工作。 乡镇人民政府和街道办事处应当根据本地区的实际情况,组织开展残疾预防和残疾人康复工作。	0	0	0	0	1	0	0	0	0	0	0	0	0	0
山西省人民政府办公厅关于印发山西省深化医药卫生体制改革2014年重点工作任务的通知	四、巩固完善基本药物制度和基层运行新机制 (二十一)稳定乡村医生队伍。原则上将40%左右的基本公共卫生服务任务交由村卫生室承担,考核合格后将相应的基本公共卫生服务经费拨付给村卫生室,不得挤占、截留和挪用。加快将符合条件的村卫生室纳入新农合定点,全面实施一般诊疗费政策。基层医疗卫生机构在同等条件下可优先聘用获得执业(助理)医师资格的乡村医生。落实乡村医生养老政策,采取多种方式,妥善解决好老年乡村医生的养老保障和生活困难问题,同步建立乡村医生退出机制。适时对乡村医生政策落实情况进行专项督查。充分发挥基层计生工作者在普及健康知识、提高公民健康素养中的积极作用。(省卫生计生委、省人力资源社会保障厅、省财政厅负责)	0	0	1	0	0	0	0	0	0	0	0	0	0	0
云南省人民政府关于印发云南省“十三五”卫生与健康规划的通知	一、规划背景 (二)“十三五”时期面临的机遇和挑战 党中央、国务院高度重视卫生与健康事业发展,把人民健康放在优先发展战略地位,提出推进健康中国建设,绘就了健康中国的宏伟蓝图。社会各界对卫生与健康的重视程度空前提高,省委、省政府把保障人民健康作为重大民生工程,把全面推进健康云南建设、促进人口均衡发展贯穿于改革发展全过程。各级财政不断加大投入,为卫生与健康事业进一步发展奠定了坚实的基础。人民群众对全面建成小康社会的追求,激发多层次、多样化的健康需求,为健康服务业创造更为广阔的发展空间。我省主动服务和融入国家发展战略,建设面向南亚东南亚辐射中心,为医疗卫生事业带来了开放发展的新机遇。全面依法治国深入推进,为提升卫生与健康治理体系和治理能力现代化水平提供了坚实的法治保障。卫生与健康事业正处于大有可为的战略机遇期,加快改革发展的内外部环境更加有利。 同时,卫生与健康事业发展也面临新的挑战。深化医改…	0	0	0	0	0	1	0	0	0	0	0	0	0	0
天津市人民政府办公厅关于加快发展健身休闲产业的实施意见	二、重点工作 (三)健身休闲设施建设工程。 2.加强特色健身休闲设施建设。发挥国家体育产业基地的引领示范作用,巩固已有各类体育旅游精品项目和运动营地,支持中心城区发展全民健身服务业,支持西部、北部城区发展户外运动产业,支持东部城区发展海上运动休闲产业,鼓励有条件的地区和企业创建国家和市级体育产业基地、体育旅游示范基地、体育旅游精品项目。鼓励城市公园和郊野公园打造健身步道系统,支持在海河景观带沿线等区域建设自行车路网。促进体育设施与园林建设有机融合,重点完成侯台湿地公园等一批体育公园建设。鼓励体育场馆进一步健全完善运动健身、体育培训、竞赛表演、运动指导、健康管理等服务。(责任单位:市体育局、市旅游局、市市容园林委、市交通运输委、市建委、市规划局、市水务局、市国土房管局)	0	0	0	1	0	0	0	0	1	0	1	0	0	0
河南省人民政府办公厅关于印发河南省推进工业结构调整打赢污染防治攻坚战工作方案的通知	二、调整优化产业布局 (一)优化产业布局。 2.主要任务: (1)严格落实能源消费总量和强度“双控”及煤炭消费减量目标任务、污染物排放等总量控制要求,加强重点区域、重点流域、重点行业和产业布局规划环评,调整优化不符合生态环境功能定位的产业布局、规模和结构,严格控制重点流域、重点区域环境风险项目。 (2)加强产业集聚区、经济技术开发区、高新技术产业开发区、工业园区等集中整治,限期进行达标改造,有序退出与主导产业发展冲突的企业。 (3)修订河南省承接产业转移指导目录,不得承接不符合环保政策、产业政策的过剩产能和落后产能。	0	0	0	0	0	0	0	0	1	0	0	0	0	0
湖北省人民政府办公厅关于印发加快全省医学教育创新发展实施方案的通知	三、完善保障措施 (一)加强组织领导。由省政府分管领导牵头,建立由省教育厅、省卫健委、省委组织部、省发改委、省科技厅、省财政厅、省人社厅等部门组成的湖北省医学教育联席会议制度,定期召开会议,研究制定重大政策,推动解决医学教育创新发展重点难点问题。充分发挥医学院校自我组织作用,成立湖北医学教育联盟。实化医学院(部)职能,完善大学、医学院(部)、附属医院医学教育管理运行机制,保障医学教育的完整性。配齐配强医学教育各级管理干部,在现有综合型大学领导职数限额内,加快实现有医学专业背景的高校负责人兼任医学院(部)或附属医院主要负责人。各地、各有关部门要把医学教育创新发展纳入经济社会发展规划和重点工作计划,各医学院校要在;00年3月底前出台加快医学教育创新发展具体工作方案。(省教育厅、省卫健委牵头,省委组织部、省财政厅、省人社厅配合)	0	0	0	0	1	0	0	0	0	0	0	0	0	0
海南省人民政府办公厅关于印发海南省区域统筹区城镇居民基本医疗保险实施办法的通知	第五章医疗服务管理 第二十一条参保人在定点医疗机构发生的医疗费用,符合城镇居民基本医疗保险有关规定的,先由定点医疗机构按照规定直接记帐,再由市、县社会保险经办机构与定点医疗机构按规定审核结算。定点医疗机构应当向住院参保人提供费用清单,并经患者本人或相关代理人、证明人签名确认。凡未经签名确认的医疗费用,统筹基金不予支付。	0	0	0	0	0	0	1	0	0	0	0	0	0	0
陕西省人民政府办公厅关于印发2013年度主要污染物总量减排实施方案的通知	二、;00年度减排项目安排 (四)氮氧化物。共安排减排项目163个,淘汰32691辆黄标车,预计减排00万吨。 5.其他行业减排项目17个,煤改气工程5个、集中供热替代工程项目12个,预计减排00万吨,占总减排量的00%。	0	0	0	0	0	1	0	0	0	0	0	0	0	0
河北省人民政府办公厅关于印发河北省“十四五”医疗卫生服务体系规划的通知	六、健全基层医疗卫生服务体系 (二)提升基层常态化疫情防控能力。充分发挥基层疫情防控预警“哨点”作用,提升疫情早期发现、报告和应对处置能力,夯实“村报告、乡采样、县检测”工作基础。在所有乡镇卫生院和社区卫生服务中心规范设置发热筛查门诊或发热诊室,在所有村卫生室、社区卫生服务站规范设置临时留观室(点),强化预检分诊与发热患者的筛查管理,提升及时发现、依法报告和处置传染病能力。 4.基层疫情防控能力建设。支持乡镇卫生院配备负压救护车,在所有乡镇卫生院和社区卫生服务中心规范设置发热筛查门诊或发热诊室,在所有村卫生室、社区卫生服务站规范设置临时留观室(点)。	0	0	0	1	0	0	0	0	0	0	0	0	0	0
云南省人民政府办公厅关于加快发展商业健康保险的实施意见	二、推动完善医疗保障服务体系 (四)全面推进并规范城乡居民大病保险。从城镇居民医保基金、新农合基金中划出一定比例或数额作为大病保险资金,从;00年起,在全省全面推行城乡居民大病保险。发挥市场机制的作用,按照“收支平衡、保本微利"的原则,公开、公正选择符合要求的商业保险机构受托承办大病保险,提高大病保险运行效率、服务水平和质量。规范商业保险机构承办服务,规范招投标流程和保险合同,明确大病保险结余率和盈利率控制标准,与基本医保和医疗救助相衔接,提供“一站式"服务。建立大病保险结余资金使用和政策性亏损补偿的具体双向风险调节机制,逐步提高城乡居民大病保险统筹层次,建立健全管理办法,增强抗风险能力。(牵头部门:省卫生计生委、人力资源社会保障厅,云南保监局;配合:各州、市人民政府,滇中产业新区管委会)	0	0	0	0	0	0	0	1	0	0	0	1	0	0
江西省人民政府办公厅关于印发江西省支持社会力量提供多层次多样化医疗服务实施方案的通知	四、保障措施 (一)扩大市场开放。 1.降低准入门槛。凡符合规划条件和准入资质的社会办医机构,各级政府不得以任何理由限制。个体诊所设置不受具体数量和地点等规划布局和户籍限制。对社会办医疗机构配置大型医用设备合理放宽规划预留空间。在医疗机构设立审批上,将审核重点放在人员资质与技术服务能力上。允许具有中医类别《医师资格证书》并经注册后在医疗、预防、保健机构中执业满三年,或者具有《中医(专长)医师资格证书》的个人,可以举办中医诊所;允许离退休名老中医在公立医院注册执业的同时,按照医师区域注册有关规定,开办只提供传统中医药服务的中医诊所;允许取得《乡村医生执行证书》的中医药一技之长人员依法依规开办中医诊所。(省卫生计生委负责)	0	0	0	0	0	0	0	0	0	0	0	1	0	0
四川省人民政府办公厅关于将大学生纳入城镇居民基本医疗保险的实施意见	三、主要政策 (二)政府补助。 按照高校财务隶属关系和管理关系,政府补助资金由同级财政负责安排。中央财政对中央所属高校学生按照政府补助标准给予补助;对地方所属高校学生按照城镇居民基本医疗保险补助办法给予补助。省财政对省属高校(含民办高校和科研院所)学生按照所在地地方财政补助标准给予补助;对市(州)所属高校学生按照省财政对市(州)城镇居民基本医疗保险补助办法给予补助。市(州)财政对市(州)属高校学生按照当地政府补助标准,除中央、省财政补助外,给予足额补助。财政补助资金和个人缴费统一纳入城镇居民基本医疗保险基金进行管理。大学生日常医疗所需资金,继续按照高校隶属关系,由同级财政予以补助。	0	0	0	0	0	0	0	0	0	0	0	0	1	0
山西省人民政府办公厅关于印发山西省大气污染防治2013年行动计划的通知	二、重点任务 (一)应完成的任务。 1.特级、一级企业的房屋建筑和市政基础设施工程施工现场达到“优良”,二级企业达到“合格”。(省住房城乡建设厅)	0	0	0	1	0	1	0	0	0	0	0	0	0	0
山西省人民政府办公厅关于印发山西省大气污染防治2013年行动计划的通知	二、重点任务 (二)应启动的任务。 5.启动县(市、区)细颗粒物监测能力、设区市国家直管监测点建设工作、国控重点污染源颗粒物排放在线监测体系以及机动车排污监控平台建设工作。(省环境保护厅)	0	0	0	1	0	0	0	0	0	0	0	0	0	0
福建省人民政府关于印发水污染防治行动计划工作方案的通知	三、主要任务 (一)全面控制污染物排放 3.推进农业农村污染防治 防治畜禽养殖污染。坚持生态先行,疏堵结合,严格养殖准入门槛,实现畜禽养殖转型升级。科学划定畜禽养殖禁养区,具体范围细化到村,按期依法关闭或搬迁禁养区内的畜禽养殖场(小区)和养殖专业户。;00年底前,基本关闭拆除可养区内存栏250头以下、未提出改造方案或改造后仍不能达标排放的生猪养殖户。自;00年起,新建、改建、扩建规模化畜禽养殖场(小区)要实施雨污分流、粪便污水资源化利用。现有规模化畜禽养殖场(小区)要根据污染防治需要,配套建设粪便污水贮存、处理、利用设施。散养密集区要实行畜禽粪便污水分户收集、集中处理利用。;00年底前,全面完成存栏5000头以上生猪规模养殖场标准化改造;;00年底前,全面完成可养区内生猪规模养殖场(存栏250头以上)标准化改造。持续推进延平、尤溪、新罗、永定、武平、南靖、闽侯、福清等8个重点区域的生猪养…	0	0	0	0	0	1	0	0	1	0	0	0	0	0
黑龙江省主要污染物总量减排监测实施办法	第五条监测要求及频次 (一)安装自动监测设备的污染源 由排污单位实时向环保部门传送COD和SO2浓度以及流量。 所在地环境监测站每季度对自动监测设备进行一次在线监测数据有效性判别比对实验,并于每季度最后一个月的20日前将比对实验数据上报省环境监测中心站。	0	0	0	0	0	0	1	0	0	0	0	0	0	0
贵州省人民政府办公厅转发省民政厅等单位关于进一步完善医疗救助制度全面开展重特大疾病医疗救助工作的实施意见的通知	二、全面开展重特大疾病医疗救助 (一)合理确定救助标准。医疗救助对象患重特大疾病就医产生的个人自付合规住院费用,先按基本住院救助比例予以救助,对超过年度基本住院最高救助限额且尚未实施救助的部分,救助比例提高5个百分点,但最高救助比例不超过100%。重特大疾病住院救助金额原则上不得超过基本住院最高救助限额的50%。第一类、第四类救助对象中的长期保障户及80岁以上老年人和第五类救助对象中的重大疾病患者,经重特大疾病医疗救助后仍有个人自付合规住院费的,通过实施医疗扶贫、临时救助以及组织慈善援助帮助解决困难。	0	0	0	0	0	0	0	0	0	0	0	0	1	0
山东省人民政府办公厅关于加快推进我省基层医疗卫生机构综合改革的指导意见	二、主要任务 (十)完善补偿机制。各地要按照《山东省人民政府办公厅关于贯彻国办发〔2010〕62号文件建立健全基层医疗卫生机构补偿机制的实施意见》(鲁政办发〔2011〕12号)要求,加大落实力度,尽快完善多渠道补偿机制。要充分发挥财政投入对综合改革的助推作用,人员经费补助同核定编制数挂钩,同实有人数脱钩,不断提高基层医疗卫生机构减人增效的积极性。省物价局等部门负责制定基层医疗卫生机构一般诊疗费收费标准的指导意见,各市要按照指导意见的要求,加快制定一般诊疗费收费标准,同时合理确定一般诊疗费医保支付政策。在基层医疗卫生机构服务收费和医保报销政策调整的基础上,合理核定基层医疗卫生机构的经常性收支,依据绩效考核结果落实经常性收支差额补助。有条件的地方可以探索实行收支两条线管理。	0	0	0	0	0	0	0	0	0	0	0	0	1	0
陕西省人民政府办公厅关于印发省主要污染物排污权有偿使用和交易试点实施方案的通知	六、部门分工 (二)省财政厅负责会同有关部门制订主要污染物排污权有偿取得收入征收、使用管理制度。	0	0	0	0	1	0	0	0	0	0	0	0	0	0
内蒙古自治区人民政府办公厅关于印发自治区2016年度大气污染防治实施计划的通知	三、保障措施 (四)严格考核奖惩 9.;00年12月底838呼和浩特市赛罕区呼市祥和供热有限责任公司桥靠供热站QXW00生活供热62154拆并/改气00.63261	0	0	0	0	0	0	0	0	0	0	0	0	0	1
海南省人民政府办公厅关于印发海南省2016年度大气污染防治实施计划的通知	二、年度工作任务及责任分工 (八)建立环境污染有奖举报制度。 ;00年6月,省生态环保厅联合省财政厅建立污染有奖举报制度,制定实施《海南省环境污染行为举报奖励管理办法》,鼓励社会组织和公众监督排污企业偷排偷放、城市不文明施工、车辆“冒黑烟”、渣土运输车辆遗撒、秸秆露天焚烧、非法熏烤槟榔等环境违法行为,营造全民参与、社会化治污大格局,努力改善环境空气质量。海口、三亚、儋州;00年同期建立地区环境污染有奖举报制度,其他市县(开发区);00年10月前完成建立。(责任单位:各市县政府、洋浦经济开发区管委会、省生态环保厅、省财政厅)	0	0	0	0	0	0	1	0	0	0	0	0	0	0
海南省人民政府办公厅关于印发海南省推进医疗联合体建设和发展实施方案的通知	三、保障政策 (四)建立与医联体相适应的绩效考核机制。全省各级卫生计生行政部门要加强对医联体绩效考核,将医联体各医疗机构职责和任务落实情况、基层人才结构改善和服务能力提升情况、基层首诊和分级诊疗制度落实情况、医疗费用控制等作为考核内容,重点考核医联体技术辐射带动情况、医疗质量情况和医疗资源下沉情况等,不单纯考核业务量,尤其要将三级医院医疗资源下沉情况、与基层医疗卫生机构协作情况,以及基层诊疗量占比、双向转诊比例、居民健康改善等指标纳入考核体系,探索建立科学合理的医联体整体绩效评估指标体系,实施医联体整体绩效考核。按国家和省相关政策规定,对整体绩效水平高的医联体,要给予表彰和奖励;对整体绩效水平低的医联体,要认真查找原因,分清责任;对医联体内职责履行不到位的医疗机构,考核结果要与医院评审评价、临床重点专科评审等挂钩。在责令其整改的同时,要暂停医院评审、临床重点专科评审资格,经整改符合要求后…	0	0	0	0	0	0	1	0	0	0	0	0	0	0
吉林省人民政府办公厅关于印发吉林省进一步加强乡村医生队伍建设实施方案的通知	九、加强基础建设,改善乡村医生工作条件和执业环境 (十九)进一步加快村卫生室信息化建设与设备配备等工作。依托全省基层医疗卫生机构信息化建设项目,加快推进以农村居民健康档案和基本诊疗为核心的信息系统建设,实现新型农村合作医疗即时结算管理、健康档案和基本诊疗信息联动、绩效考核以及远程培训、远程医疗等功能。力争到;00年年底,为全省村卫生室配置健康一体机及其他基本诊疗设备(含一定数量的中医诊疗设备),确保村卫生室医疗设备可以满足村民基本医疗卫生服务需求。(牵头部门:省财政厅,配合部门:省卫生计生委)	1	0	0	1	0	0	0	0	0	0	0	0	0	0
国务院办公厅关于印发深化医药卫生体制改革2014年重点工作任务的通知	一、加快推动公立医院改革 (八)完善中医药事业发展政策和机制。 研究完善鼓励中医药服务提供和使用的政策,加强县中医院和县医院中医科基本条件和能力建设,积极引导医疗机构开展成本相对较低、疗效相对较好的中医药诊疗服务。继续实施基层中医药服务能力提升工程。研究制订中医药发展战略规划,提出加快中医药发展的政策措施。 (中医药局、发展改革委、卫生计生委、财政部、人力资源社会保障部负责)	0	0	0	0	1	0	0	0	0	0	0	0	0	0
江苏省政府办公厅关于印发江苏省“十三五”食品药品安全规划的通知	三、主要任务 (三)加强食品全程监管。 2.强化食用农产品生产源头治理。严格控制农业外源性污染,继续做好土壤重金属污染监测和修复试点工作。加强投入品监管,推进农资农技连锁经营,全面实行高毒农药定点经营,探索完善高效低毒农药、商品有机肥等农业投入品补贴制度,因地制宜加快推广苏州等地农药零差率统一配供经验。加强农药安全风险管控和登记评估工作,到;00年基本覆盖主要特色作物和蔬菜。农药、兽药、饲料及饲料添加剂基本建立电子追溯码监管制度。全面推行农业标准化生产,推进实施农业(农村)标准化试点示范项目,支持国有农场、龙头企业、农民合作社等率先实现标准化。深入发展无公害农产品、绿色食品、有机农产品和农产品地理标志等“三品一标”,扩大安全优质食用农产品生产规模。加大绿色食品标准化生产技术推广应用,创建无公害农产品、绿色食品、有机农产品和农产品地理标志示范区。	0	0	0	0	0	1	1	0	0	0	1	0	1	0
吉林省人民政府办公厅关于加强全民健身场地设施建设发展群众体育若干措施的通知	二、充分挖掘存量建设用地潜力 (三)统筹规划建设全民健身场地设施。在不改变、不影响公共服务建设用地主要用途的前提下,统筹规划,对文化娱乐、教育、养老、体育健身等功能进行整合,复合利用土地规划建设全民健身场地设施。(省体育局、省文化和旅游厅、省教育厅、省民政厅负责)	0	0	0	1	0	0	0	0	0	0	0	0	0	0
内蒙古自治区人民政府办公厅关于印发2016年度水污染防治计划的通知	三、重点任务 (二)强化城镇生活污染治理。 2.;00年9月底,各盟市要完成城镇污水处理厂污泥堆放点排查和规范化改造工作,杜绝污泥二次污染。开展城镇污水处理厂现有污泥处理处置设施达标改造工作,推进地级城市污泥处理处置中心建设,;00年底,地级城市污泥无害化处理率达到70%以上。(自治区住房城乡建设厅牵头,自治区发展改革委、经济和信息化委、农牧业厅、环保厅等部门参与)	0	0	0	1	1	1	0	0	0	0	0	0	0	0
贵州省人民政府办公厅转发省民政厅等单位关于进一步完善医疗救助制度全面开展重特大疾病医疗救助工作的实施意见的通知	进一步完善医疗救助制度,全面开展重特大疾病救助工作是完善社会救助体系,保障和改善民生,打好社会保障兜底攻坚战的重要举措,各地各相关部门要进一步提高思想认识、加强组织领导、完善工作机制、强化工作措施,最大限度减轻困难群众医疗支出负担。	0	0	0	0	1	0	0	0	0	0	0	0	0	0
云南省人民政府关于进一步加强“十二五”全省主要污染物总量减排工作的若干意见	四、主要工作措施 (十四)加强节能发电调度和电力需求侧管理。改革发电调度方式,优先安排节能、环保、高效火电机组发电上网。电力监管部门要加强对节能环保发电调度工作的监督。	0	0	0	0	1	0	0	0	0	0	0	0	0	0
内蒙古自治区人民政府办公厅关于印发自治区2016年度大气污染防治实施计划的通知	三、保障措施 (四)严格考核奖惩 30.;00年6月556阿拉善盟阿拉善经济开发区3采暖00.5拆除00.487	0	0	0	0	0	0	0	0	0	0	0	0	0	1
新疆维吾尔自治区人民政府办公厅关于印发自治区2013年主要污染物排放总量控制计划的通知	三、保障措施 (一)严格落实目标责任。各地州市、县(市)人民政府(行政公署)是污染减排的责任主体,对本行政区域污染减排工作负总责。要切实发挥政府主导作用,加强对污染减排工作的组织领导、监督检查和考核奖惩。各相关部门要各司其职,密切配合,共同推进污染物排放总量控制工作。环保部门负责组织实施总量控制计划和加强污染源监督管理;发改部门负责制定和落实节能减排政策;经信部门负责淘汰和关停落后产能;住房城乡建设部门负责完善城镇生活污水处理管网设施;农业、畜牧部门负责推进农业及畜禽养殖业污染综合整治;公安交管部门负责淘汰老旧机动车。各排污单位是污染减排的实施主体,要切实履行排污减排主体责任,增强污染减排的主动性和自觉性,严格执行各项环保法律法规,落实计划确定的目标任务。	0	0	0	0	1	0	0	0	0	0	0	0	0	0
云南省人民政府关于进一步加强“十二五”全省主要污染物总量减排工作的若干意见	七、省住房城乡建设厅 (二)督促指导已建成城镇污水处理厂的运行管理,督促指导现有城镇污水处理厂深度处理与升级改造,提高出水水质。完善配套污水管网系统,提高运行负荷率和污水处理率。	0	0	0	0	1	0	0	0	0	0	0	0	0	0
内蒙古自治区人民政府办公厅关于印发自治区2016年度大气污染防治实施计划的通知	三、保障措施 (四)严格考核奖惩 7.;00年12月底823呼和浩特市玉泉区内蒙古航空职业技术学校立式炉生活供热1359拆并/改气00.00.51	0	0	0	0	0	0	0	0	0	0	0	0	0	1
天津市人民政府办公厅关于调整完善医疗保障政策减轻困难家庭医疗负担的意见	一、调整居民医疗保险政策 (四)调整学生儿童医疗保险结算期。从;00年起,将学生儿童医疗保险结算期由学年度调整为自然年度。;00年9月至12月期间发生的医疗费用由医疗保险基金按规定解决。 以上医疗保险政策自;00年1月1日起实施。	0	0	0	0	0	1	1	0	0	0	0	0	0	0
山西省人民政府办公厅关于印发山西省水污染防治2016年行动计划的通知	三、重点任务 (八)严格环境执法监管。 5.开展《山西省污水综合排放标准》制定、《山西省地表水水环境功能区划》修订工作。(省环保厅牵头,省住房城乡建设厅、省水利厅、省农业厅、省质监局等参与,各市人民政府配合)	0	0	0	0	0	0	1	0	0	0	0	0	0	0
河南省人民政府办公厅转发河南省公共卫生与基层医疗卫生事业单位绩效工资实施意见的通知	三、绩效工资总量和水平的核定 (一)公共卫生与基层医疗卫生事业单位绩效工资总量由相当于单位工作人员上年度12月份基本工资的额度和规范后的津贴补贴构成。绩效工资水平由县级以上人力资源社会保障、财政部门按照与当地事业单位工作人员平均工资水平相衔接的原则核定。各地结合实际确定具体核定办法。	0	0	0	0	0	0	1	0	0	0	0	0	0	0
海南省人民政府办公厅关于印发海南省医疗健康产业发展“十三五”规划的通知	一、我省医疗健康产业发展基础和面临形势 (一)发展基础。 2.基本医疗和公共卫生服务体系初步具备了支撑健康产业发展的能力。全省各级公立医疗机构基础设施得到明显改善,海口、三亚、琼海、儋州、五指山五大区域医疗中心初步建立。截至;00年年底,全省医疗卫生机构数为5046家,其中:医院202个,基层医疗卫生机构4714个,专业公共卫生机构119个,其他医疗卫生机构11家。每千人口执业(助理)医师00人(国家00人),每千人口注册护士00人(国家00人);每千人口拥有床位00张(国家00张)。婴儿死亡率00‰(国家00‰),孕产妇死亡率00/10万(国家00/10万),基本达到我国东部省份水平。	0	0	0	0	0	0	0	0	0	0	0	0	0	1
河北省人民政府办公厅关于印发河北省“十四五”医疗卫生服务体系规划的通知	三、总体布局与资源配置 (五)技术。 4.县级临床重点专科。支持不少于600个县级临床重点专科建设项目,提升专科医疗服务能力,做好县域居民健康“守门人”。	1	0	0	0	0	1	0	0	0	0	0	0	0	0
湖北省人民政府办公厅关于做好今冬明春大气污染防治工作的通知	自《大气十条》实施以来,我省出台了一系列政策措施,做了不少工作,也取得了一定的成效。特别是今年以来,在一季度PM10浓度不降反升,且持续恶化的被动局面下,各地、各部门突出问题导向、加强工作调度、强化工作举措、严格督办检查,全省纳入国家考核范围的12个地市从6月份开始,PM10累计平均浓度实现同比连续5个月下降。1-10月,纳入国家考核范围地市的PM10平均浓度为103微克/立方米,较;00年同期下降00%,但仍高于;00年同期,距国家下达我省的;00年度目标(97微克/立方米)差距依然较大。 历年监测数据表明,冬季是大气污染较为集中的时期,;00年、;00年四季度全省PM10平均浓度分别超过全年平均浓度的	0	0	0	0	0	1	0	0	0	0	0	0	0	0
福建省人民政府办公厅关于印发2005年度全省治理“餐桌污染”建设“食品放心工程”工作方案的通知	由省卫生厅承办,经贸委、教育厅、工商局、环保局、南昌铁路局福州办事处协办。治理目标:全省学校、企事业单位食堂、酒店、宾馆、旅社、饮食摊点各项卫生指标基本达到国家和省地方标准,各类熟食摊点食品基本符合国家或省有关食品卫生标准。主要措施:	0	0	0	0	0	1	0	0	0	0	0	0	0	0
青海省人民政府关于进一步加强药品安全监管工作的意见	二、主要任务 (二)全面加强高风险药品质量安全监管。 7.强化院内制剂质量监管。积极推进制剂室规范化建设,完善制剂炮制规范,严格执行制剂质量标准和有关技术、工艺,规范制剂配制。市州级市场监管部门要联合卫生健康部门强化对本行政区域内医疗机构制剂室的监督检查。加大制剂抽检力度,依法处置不合格产品和违法违规行为,监督检查结果及时通报同级卫生健康部门。落实医联体(医共体)内调剂使用医疗机构制剂的惠民政策,支持民族药产业健康发展。(省卫生健康委、省市场监管局、省药品监管局,各市州政府按职责分工负责)	0	0	0	0	0	0	1	0	0	0	0	0	0	0
国务院办公厅关于加快发展商业健康保险的若干意见	三、扩大商业健康保险供给 (一)丰富商业健康保险产品。大力发展与基本医疗保险有机衔接的商业健康保险。鼓励企业和个人通过参加商业保险及多种形式的补充保险解决基本医保之外的需求。鼓励商业保险机构积极开发与健康管理服务相关的健康保险产品,加强健康风险评估和干预,提供疾病预防、健康体检、健康咨询、健康维护、慢性病管理、养生保健等服务,降低健康风险,减少疾病损失。支持商业保险机构针对不同的市场设计不同的健康保险产品。根据多元化医疗服务需求,探索开发针对特需医疗、药品、医疗器械和检查检验服务的健康保险产品。开发药品不良反应保险。发展失能收入损失保险,补偿在职人员因疾病或意外伤害导致的收入损失。适应人口老龄化、家庭结构变化、慢性病治疗等需求,大力开展长期护理保险制度试点,加快发展多种形式的长期商业护理保险。开发中医药养生保健、治未病保险产品,满足社会对中医药服务多元化、多层次的需求。积极开发满足老年人…	0	0	0	0	0	0	0	1	0	0	1	0	0	0
甘肃省人民政府办公厅印发关于加快中医药特色发展若干措施的通知	九、实施中医药环境优化工程 (三)完善中医药服务价格和医保政策。稳妥有序推动医疗服务价格改革,建立突出中医特色的医疗服务价格体系。完善中医药服务分级定价政策,优化比价关系。医疗服务价格动态调整时,重点将功能疗效明显、患者广泛接受、甘肃特色优势突出、应用历史悠久的中医医疗服务项目纳入调价范围进行适当倾斜,充分考虑中医医疗服务特点及中医医务人员的劳务价值。按照《国家基本医疗保险药品目录》省级调整权限,将临床价值高、经济性评价优良的中医诊疗项目、民族药、中药饮片和医疗机构中药制剂按规定纳入我省基本医疗保险支付范围。支持我省中医药传承创新发展,对《国家基本医疗保险药品目录》中的中药饮片和省级权限调整的有地方标准的中药饮片实行“甲类”支付;按照国家规定,对省级权限调整的民族药、医疗机构制剂实行“乙类”支付,并健全动态调整和退出机制。探索符合中医药特点的医保支付方式,鼓励实行中西医同病同效同价。一般…	0	0	1	0	0	0	0	0	0	0	0	1	1	0
海南省人民政府办公厅关于印发海南省医疗健康产业发展“十三五”规划的通知	一、我省医疗健康产业发展基础和面临形势 (一)发展基础。 6.海南国际旅游岛建设稳步推进为医疗健康产业的发展提供了旺盛的市场需求。随着海南国际旅游岛建设的稳步推进,吸引了越来越多国内外游客来海南度假旅游。;00年全省接待游客00万人次,较;00年增长00%;其中旅游过夜人数00万人次,增长00%。特别是每年冬季由全国各省市来海南休闲、养生、养老的“候鸟人群”已达110万。据抽样统计调查,90%的游客希望在海南获得多样化的健康服务。	0	0	0	0	0	0	0	0	0	0	0	0	0	1
甘肃省人民政府办公厅关于印发甘肃省医药卫生体制五项重点改革2011年度主要工作安排的通知	二、工作任务 (五)积极稳妥推进公立医院改革。 7.鼓励和引导社会资本举办医疗机构,形成多元办医格局。 (1)完善区域卫生规划和医疗机构设置规划,严格控制公立医院建设规模、标准和贷款行为,新增或调整医疗卫生资源在符合准入标准的条件下优先考虑社会资本。研究确定公立医院改制的范围和办法,稳妥推进公立医院改制。(省发展改革委、省财政厅、省卫生厅负责) (2)按照相关规章、办法及实施细则和配套文件精神,落实鼓励和引导社会资本举办医疗机构的政策,促进非公立医疗机构发展。鼓励社会资本举办普通医疗机构,支持社会资本举办高端医疗机构,控制公立医院开展特需服务的比例。(省卫生厅、省商务厅负责)	0	0	0	0	0	0	0	0	0	0	0	1	0	0
山东省人民政府办公厅关于加快推进我省基层医疗卫生机构综合改革的指导意见	三、实施步骤 (五)考核评估,总结验收。省卫生厅牵头制定基层医疗卫生机构综合改革考核评价标准。基层医疗卫生机构综合改革完成后,各地要及时考核评估,总结经验,不断完善,确保改革成效。在各县(市、区)总结自评的基础上,各设区的市要对辖区内的县(市、区)逐一考核验收,验收结果于9月底前上报省政府。省政府将对各设区的市基层医疗卫生机构综合改革完成情况进行重点考核。	0	0	0	0	1	0	0	0	0	0	0	0	0	0
广东省人民政府办公厅关于印发广东省医疗卫生领域省级与市县财政事权和支出责任划分改革实施方案的通知	一、主要内容 (五)相关项目的执行标准。 3.地方公共卫生服务、医疗救助、卫生健康能力提升、中医药事业传承与发展等4项暂不具备统一制定基础标准的条件,省提出原则要求并设立绩效目标,市县可结合实际自主制定本地区标准。	0	0	0	0	0	0	1	0	0	0	0	0	0	0
重庆市人民政府办公厅关于印发重庆市进一步深化基本医疗保险支付方式改革实施方案的通知	一、总体要求 (二)基本原则。 4.统筹推进。统筹推进医疗、医保、医药各项改革,注重改革的系统性、整体性、协调性,发挥部门合力,多措并举,实现政策叠加效应。	0	0	0	0	1	0	0	0	0	0	0	0	0	0
吉林省人民政府办公厅关于加强全民健身场地设施建设发展群众体育若干措施的通知	三、提升健身设施建设与管理水平 (一)提高健身场地设施项目审批效率。相关职能部门在涉及全民健身场地设施项目审批时,要在确保生态环境安全、安全生产、节约用地的基础上,进一步简化、优化审批程序,提高审批效率。(省发展改革委、省自然资源厅、省生态环境厅、省住房城乡建设厅、省体育局、省应急厅、省林草局、省水利厅和各市〔州〕、县〔市〕政府负责)	0	0	0	0	1	0	0	0	0	0	0	0	0	0
西藏自治区人民政府办公厅关于转发环境保护厅“十二五”主要污染物总量减排考核办法的通知	第六条主要污染物总量减排工作情况的考核内容主要包括三个方面: (二)主要污染物总量减排统计监测考核体系的建设运行情况。监测体系建设运行情况依据国家重点监控企业名单核实主要污染物自动监测设备的建设和联网情况、监控数据传输情况、监测结果公开情况进行评定。统计体系和考核体系建设运行情况依据各地相关文件和抽查复核情况进行评定。	0	0	0	0	0	0	1	0	0	0	0	0	0	0
云南省人民政府办公厅关于印发全省发展中医药大会重点任务分解方案的通知	四、着力培养高素质中医药人才队伍 (十八)加强基层中医药人才培养继续加大县乡中医临床技术骨干和农村订单定向中医专业学生培养力度,组织实施好中医类别全科医师培养和住院医师规范化培训。加大乡村医生中医药基本知识和基本技能培训,将乡村医生中医药培训考核与执业准入挂钩。将农村具有一技之长的中医药人员通过考核、培训纳入乡村医生管理,允许在农村地区举办只提供传统中医药服务的个体诊所。加大基层中医药人才引进、培养力度,到;00年底,中医药人员占基层医疗机构医药人员的20%以上。(牵头单位:省卫生计生委,各州、市、县、区人民政府;配合单位:省财政厅、教育厅)	0	0	1	0	0	1	0	0	0	0	0	0	0	0
青海省人力资源和社会保障厅关于印发青海省加快推进医疗保险支付方式改革实施方案的通知	青海省人力资源和社会保障厅关于印发青海省加快推进医疗保险支付方式改革实施方案的通知青海省人力资源和社会保障厅关于印发青海省加快推进医疗保险支付方式改革实施方案的通知青政办[2015220号各市、自治州人民政府,省政府各委、办、厅、局:《青海省加快推进医疗保险支付方式改革实施方案》已经省深化医药卫生体制改革领导小组会议审议通过,现印发给你们,请认真贯彻执行。青海省加快推进医疗保险支付方式改革实施方案根据《青海省人民政府关于印发深化医药卫生体制改革综合试点方案的通知》(青政〔2015〕15号)精神,结合我省实际,制定本实施方案。	0	0	0	0	0	0	0	0	0	0	0	0	0	1
新疆维吾尔自治区人民政府办公厅关于印发自治区2013年主要污染物排放总量控制计划的通知	一、指导思想、编制原则和总量控制目标 (二)编制原则 3.可操作的原则。根据国家、自治区总量控制要求,结合排污单位实际,将减排任务落实到单位和项目,明确具体措施,增强操作性。	0	0	0	0	0	1	0	0	0	0	0	0	0	0
西藏自治区人民政府办公厅关于转发环境保护厅“十二五”主要污染物总量减排考核办法的通知	第六条主要污染物总量减排工作情况的考核内容主要包括三个方面: (一)主要污染物减排目标完成情况。按照主要污染物总量减排统计办法、监测办法和总量减排核算细则相关规定予以核定。	0	0	0	0	0	0	1	0	0	0	0	0	0	0
广东省人民政府关于印发“十二五”期间深化医药卫生体制改革实施方案的通知	二、加快全民医保体系建设,着力提升医疗保障和管理水平 (三)完善基本医保管理体制。 8.按照管办分开原则,完善基本医保管理和经办运行机制,明确界定职责,进一步落实医保经办机构的法人自主权,提高经办能力和效率。(由省编办,省人力资源社会保障厅、卫生厅负责)	0	0	0	0	1	0	0	0	0	0	0	0	0	0
青海省人民政府关于印发青海省城镇居民基本医疗保险试点工作指导意见的通知	五、工作措施 (二)加强宣传动员。充分利用广播、电视、报纸等各种宣传手段,广泛深入地宣传居民医保的政策和具体规定,引导城市居民积极参保。	0	0	0	0	1	0	0	0	0	0	0	0	0	0
福建省人民政府办公厅关于印发2005年度全省治理“餐桌污染”建设“食品放心工程”工作方案的通知	八、其他有关分工 (五十九)由省新闻出版局负责,省工商局、公安厅、质监局配合,开展食品商标、标识、包装物印刷业的专项整治,严厉查处非法印刷食品假包装、假标识、假商标的单位和个人。	0	0	0	0	0	0	1	0	0	0	0	0	0	0
福建省人民政府办公厅关于完善公立医疗机构药品集中采购工作的若干意见	福建省人民政府办公厅关于完善公立医疗机构药品集中采购工作的若干意见 (闽政办〔2015〕124号) 各市、县(区)人民政府,平潭综合实验区管委会,省人民政府各部门、各直属机构,各大企业,各高等院校: 改革公立医疗机构药品集中采购制度是深化公立医院综合改革,控制医疗费用不合理增长,抑制药品流通领域腐败现象,缓解群众“看病贵”的重要环节。根据《国务院办公厅关于完善公立医院药品集中采购工作的指导意见》(国办发〔2015〕7号)和《国家卫生计生委关于落实完善公立医院药品集中采购工作指导意见的通知》(国卫药政发〔2015〕70号)精神,按照省委、省政府制定的《福建省深化医药卫生体制改革综合试点方案》(闽委发〔2015〕3号)中关于改革公立医院药品集中采购办法的工作部署,结合我省实际,制定本意见。	0	0	0	0	0	0	0	0	0	0	0	0	0	1
山西省人民政府关于印发山西省土壤污染防治工作方案的通知	四、组织实施 (二)推进信息公开,引导公众参与和社会监督。 2.引导公众参与。 (111)鼓励公众通过“12369”环保举报热线、信函、电子邮件、政府网站、微信、微博平台等途径,对存在乱排废水、废气,乱倒废渣、污泥等污染土壤环境违法行为的任何单位和个人进行监督和举报,举报查证属实的给予奖励。有条件的地方可根据需要聘请环境保护义务监督员,参与现场环境执法、土壤污染事件调查处理等。鼓励种粮大户、家庭农场、农民合作社以及民间环保机构参与土壤污染防治工作。 牵头单位:省环保厅 参加单位:省国土资源厅、省住房城乡建设厅、省农业厅等	0	0	0	0	1	0	0	0	0	0	0	0	0	0
广西壮族自治区人民政府办公厅关于印发广西促进养老托育服务健康发展三年行动方案（2021—2023年）的通知	三、主要任务 (四)完善养老托育服务综合监管体系。 7.完善养老托育统计指标。依据养老产业统计分类,开展广西养老产业认定办法研究工作;推进重要指标年度统计,探索构建托育服务统计指标体系。;00年底,研究出台广西养老产业认定办法。	0	0	0	0	1	0	0	0	0	0	0	0	0	0
浙江省人民政府关于十二五时期重污染高耗能行业深化整治促进提升的指导意见	三、主要任务 (四)规范日常管理。 3.严防突发环境事故。6大重点行业企业及所在工业园区要编制环保应急预案,配备相应的环境风险防范设施和应急物资,定期开展污染事故应急演练,提高环境事故应急应对能力。厂区必须按规范要求设置应急事故池,应急事故池的容积应满足相关技术规范的要求;事故源切断系统应设置电动和手动两套系统;危险化学品储存区必须设置应急围堰。要积极开展环境风险评估,积极投保环境污染责任险,减少和分担突发环境事故引发的环境风险。	0	0	0	0	1	0	0	0	0	0	0	0	0	0
江苏省政府办公厅关于印发江苏省“十三五”食品药品安全规划的通知	五、保障措施 (二)完善工作机制,加强规划实施协调。 各地、各有关部门要加强沟通协调,健全完善信息通报、形势会商、风险交流、协调联动等制度,强化省市之间、部门之间的协调配合,及时解决规划实施过程遇到的困难和问题。充分发挥各级食安委及其办公室的作用,统筹协调、监督指导各成员单位落实规划实施责任,优化资源配置,形成实施合力。	0	0	0	0	1	0	0	0	0	0	0	0	0	0
黑龙江省人民政府办公厅关于印发黑龙江省“十四五”促进养老托育服务健康发展实施方案的通知	二、扩大多方参与,提升养老托育服务供给质量 (三)专项行动。 2.城乡养老托育配套用房建设行动。在城市居住社区建设补短板和城镇老旧小区改造中统筹推进养老托育服务设施建设,新建住宅小区或居住区按标准规划建设社区居家养老服务用房及与常住人口规模相适应的婴幼儿照护服务设施,并确保新建住宅小区与配套养老托育服务设施同步规划、同步建设、同步验收、同步交付,已建成住宅小区或居住区有缺口的,通过购置、置换、租赁、改造等方式补足或建设。	0	0	0	1	0	0	0	0	0	0	0	0	0	0
甘肃省人民政府办公厅关于印发甘肃省医药卫生体制五项重点改革2011年度主要工作安排的通知	二、工作任务 (四)促进基本公共卫生服务逐步均等化。 10.全面开展9类基本公共卫生服务,提高居民健康素质。 (1)拓展和深化基本公共卫生服务内容,扩大服务人群,提高服务质量,;00年人均基本公共卫生服务经费标准提高到25元。(省卫生厅、省财政厅负责) (2)完善并严格执行9类国家基本公共卫生服务项目服务标准、操作规范和考核办法,提高服务水平。城乡居民健康档案规范化电子建档率达到50%左右。进一步提高儿童保健、孕产妇保健等基本公共卫生服务质量。做好农民工基本公共卫生服务。为65岁及以上老年人每年进行健康危险因素调查和体格检查。高血压、糖尿病管理人数分别提高到71万人、26万人以上。对发现的重性精神疾病患者全部纳入管理。(省卫生厅、省财政厅负责) (3)采取多种渠道宣传普及健康知识,完善基层健康宣传网络,倡导健康生活方式,促进全民健康素质的提高。(省卫生厅负责)	0	0	0	0	1	0	0	0	0	0	0	0	0	0
内蒙古自治区人民政府办公厅关于印发自治区2016年度大气污染防治实施计划的通知	三、保障措施 (四)严格考核奖惩 5.;00年12月底688呼和浩特市新城区呼和浩特市昱昊供热有限公司(天和车小锅炉房)QXW7生活供热103590拆并/改气00.7212	0	0	0	0	0	0	0	0	0	0	0	0	0	1
福建省人民政府关于印发水污染防治行动计划工作方案的通知	三、主要任务 (五)全力保障水生态环境安全 5.严格控制环境激素类化学品污染。;00年底前完成环境激素类化学品生产使用情况调查,监控评估水源地、农产品种植区及水产品集中养殖区风险,实施环境激素类化学品淘汰、限制、替代等措施。(省环保厅牵头,省经信委、农业厅、海洋渔业厅等参与)	0	0	0	0	0	0	1	0	0	0	0	0	0	0
江西省人民政府办公厅关于印发江西省国民营养计划(2018—2030年)实施方案的通知	二、主要实施策略 (六)加强营养健康基础数据共享利用。大力推动营养健康数据互通共享。依托现有信息平台,加强营养与健康信息化建设,完善食物成分与人群健康监测信息系统。构建信息共享与交换机制,推动互联互通与跨行业数据共享。建立营养健康数据标准体系和电子认证服务体系,切实提高信息安全能力。积极推动“互联网+营养健康"服务和促进大数据应用试点示范,带动以营养健康为导向的信息技术产业发展。(省卫生计生委牵头,省教育厅、省工信委、省农业厅、省质量技术监督局、省体育局、省食品药品监管局分工配合)全面深化数据分析和智能应用。建立营养健康数据资源目录体系,制定分级授权、分类应用、安全审查的管理规范,促进数据资源的开放共享,强化数据资源在多领域的创新应用。推动多领域数据综合分析与挖掘,开展数据分析应用场景研究,构建关联分析、趋势预测、科学预警、决策支持模型,推动整合型大数据驱动的服务体系,支持业务集成、跨部…	1	0	0	0	1	0	0	0	0	0	1	0	0	0
内蒙古自治区人民政府办公厅关于印发自治区2016年度大气污染防治实施计划的通知	三、保障措施 (四)严格考核奖惩 4.;00年12月449乌兰察布市察右前旗察右前旗裕兴炭素有限责任公司1NSH00供热1252取缔00.00.5	0	0	0	0	0	0	0	0	0	0	0	0	0	1
河南省人民政府办公厅关于做好2010年全省污染源普查动态更新调查工作的通知	四、加强组织领导 我省更新调查范围包括工业、农业、生活(含机动车)污染源和集中式污染治理设施等方面,面广源多,时间紧迫,任务繁重。各市要建立政府组织领导,环保部门牵头,公安、财政、住房城乡建设、农业、统计、畜牧等部门共同参与的更新调查工作机制,明确工作任务,落实专项经费,认真抓好落实。要明确更新调查的主要内容,既全面把握,又突出重点,确保数据质量。环保部门牵头负责更新调查工作,制定工作方案,汇总、审核和上报更新调查数据;公安机关交通管理部门负责配合有关机动车污染物排放情况的调查;财政部门负责落实专项工作经费;住房城乡建设部门负责配合集中式污染治理设施有关情况的调查;农业、畜牧部门负责配合有关种植业、畜禽养殖业和水产养殖业污染物排放情况的调查;统计部门负责及时提供有关基础数据。各有关部门要加强配合,积极协作,确保顺利完成更新调查任务,为“十二五”污染减排工作打好基础。 河南省人民政府办公厅…	0	0	0	0	1	0	0	0	0	0	0	0	0	0
青海省人民政府关于印发青海省城镇居民基本医疗保险试点工作指导意见的通知	城镇居民基本医疗保险试点工作政策性强,涉及面广,关系到广大居民的切身利益,要高度重视,加强领导,积极稳妥地进行。 全省;00年6月份全面启动,全面推行,同时确定西宁市、格尔木市为以大病统筹为主的城镇居民基本医疗保险国家试点城市,纳入国家试点城市范围。具体工作分4个阶段进行。	0	0	0	0	0	0	0	0	0	0	1	0	0	0
浙江省人民政府关于十二五时期重污染高耗能行业深化整治促进提升的指导意见	三、主要任务 (六)切实加强监管。 2.加强日常巡查。各级工商、公安等部门要密切配合,加强巡查,对无证无照经营的6大重点行业企业,发现一家取缔一家,严防“低、小、散”污染企业反弹。各级环保部门要加强对重点污染源和水气环境的定期巡查和监测,各级国土资源、农业部门要组织开展工业园区地下水位、水质的动态监测和周边农作物的监测,及时依法查处违法问题。	0	0	0	0	1	0	0	0	0	0	0	0	0	0
山西省人民政府办公厅关于印发山西省水污染防治2016年行动计划的通知	三、重点任务 (六)保障水环境安全。 3.开展饮用水水源保护区内违法建筑和排污口排查和清理工作。(省环保厅牵头,省水利厅、省发展改革委、省财政厅、省住房城乡建设厅、省卫生计生委等参与,各市人民政府负责落实)	0	0	0	0	1	0	0	0	0	0	0	0	0	0

## Sheet: re-label
policy_name	policy	technology	fund	talent	infrastrcture	public_service	goal_planning	regulation	financial	strategy	gov_purchase	demonstration_proj	market	subsidy	other
天津市人民政府办公厅关于印发贯彻落实京津冀及周边地区大气污染防治协作机制会议精神12条措施的通知	一、抓好任务落实 《贯彻落实京津冀及周边地区大气污染防治协作机制会议精神的12条措施》(以下简称《12条措施》)重点任务分为既定任务、新增任务两部分。其中,既定任务源自清新空气行动方案重点任务分解表和美丽天津一号工程目标责任书,主要是根据当前工作进展,对需要调整细化的部分重点任务进一步明确了新的完成时限和进度要求;新增任务是依据国家和我市新要求,新增加的任务或任务量。 各区县人民政府和各牵头部门要进一步加强领导,继续抓好清新空气行动方案重点任务分解表各项任务落实,具体分解细化《12条措施》各项重点任务。对于不能按时限要求完成任务的,各牵头部门要依法依规追究责任。不能按时完成任务的区县人民政府,要向市人民政府报告原因,并限期整改。	0	0	0	0	1	0	1	0	0	0	0	0	0	0
陕西省人民政府办公厅关于印发陕西省医药监督管理局职能配置内设机构和人员编制规定的通知	三、内设机构 (四)安全监管处 制定全省基本药物目录,组织制定非处方药制度,审定并公布非处方药物目录;审核临床药理基地;负责药品不良反应监测;拟定、修订药物非临床研究质量、临床试验质量管理规范及药品生产质量、医疗单位制剂管理规范并监督实施,依法核发药品生产企业、医疗单位制剂许可证。	0	0	0	0	0	0	1	0	0	0	0	0	0	0
青海省人民政府办公厅关于印发青海省医疗卫生服务体系规划(2016—2020年)的通知	第一节完善医疗卫生服务体系功能 四、鼓励社会资本举办医疗卫生机构 加强社会办医疗机构与公立医疗卫生机构的分工协作,提高医疗卫生资源的整体效率。优先支持社会力量举办非营利性医疗机构,引导社会力量直接投向资源稀缺地区及满足多元需求的服务领域,也可以多种形式参与国有企业所办医疗机构及部分公立医院改制重组。鼓励公立医院与社会力量以合资合作的方式共同举办新的非营利性医疗机构,满足群众多层次、多元化的医疗服务需求。形成公立医院和社会办医院公平竞争、相互促进、共同发展的格局。完善配套支持政策,支持将社会办医院纳入医保定点范围,并在医疗机构等级评审、人员职称评定、继续教育等方面给予平等待遇。 建立社会力量参与公共卫生工作的机制。政府通过购买服务等方式,鼓励和支持社会力量参与公共卫生工作,并加强技术指导和监督管理。	0	0	0	0	0	0	0	0	0	1	0	1	0	0
江西省人民政府关于建立全科医生制度的实施意见	二、逐步建立规范的全科医生培养制度 (七)统一学位授予标准。具有;00年制临床医学本科及以上学历者参加全科医生规范化培养合格后,并符合国家学位要求的,授予临床医学(全科方向)相应专业学位。具体办法按国家相关政策执行。	0	0	0	0	0	0	1	0	0	0	0	0	0	0
内蒙古自治区人民政府办公厅关于印发水污染防治工作方案的通知	三、制度措施 (一)严格环境执法监管 1.完善地方法规标准 健全地方法规。出台《内蒙古自治区饮用水水源保护条例》、《内蒙古自治区呼伦湖国家级自然保护区条例》等法规、政策,研究制定地下水管理、环境监测等地方性法规规章。(自治区法制办牵头,发展改革委、经济和信息化委、国土资源厅、环保厅、住房城乡建设厅、交通运输厅、水利厅、农牧业厅、卫生计生委、保监局等参与) 完善地方标准。严格执行国家各项环境质量标准及污染物排放标准,围绕水质改善目标,拟推进制定煤化工(煤制油或煤制气)污染物排放地方标准,按照行业类别、地域分别或统一制定。结合实际情况在水质长期不达标的区域实施水污染物特别排放限值。(自治区环保厅牵头,发展改革委、经济和信息化委、国土资源厅、住房城乡建设厅、水利厅、农牧业厅、质监局等参与)	0	0	0	0	0	0	1	0	0	0	0	0	0	0
西藏自治区人民政府关于进一步扶持和促进藏医药事业发展的意见	七、夯实基础,广辟渠道,为藏医药事业发展创造条件 (十八)藏医医疗服务和藏药纳入医疗保障政策和基本药物政策范围。在城镇职工基本医疗保险、城镇居民基本医疗保险、农牧区医疗等医疗保障制度中,将符合基本医疗保险规定的藏医医疗服务和藏药纳入医疗保障政策和基本药物政策范围;将符合基本医疗保险定点医疗机构管理规定的藏医医疗机构纳入我区基本医疗保险定点医疗机构管理范围;将符合基本医疗保险诊疗项目、医疗服务设施范围和支付标准规定的藏医诊疗项目、藏医医疗服务设施纳入我区基本医疗保险统筹基金支付范围。在价格制定、临床应用、报销比例中充分考虑藏医药特点,鼓励使用藏药。努力争取国家有关部门将符合条件的藏药逐步纳入《国家基本药物目录》。制订《西藏自治区基本用药藏药目录》,增加自治区职工医疗保险和农牧区医疗药物目录中的藏药品种,加大藏药的政府采购力度。县级藏医院(科)、乡(镇)卫生院必须配置自治区基本用药目录规定的…	0	0	0	0	0	0	0	0	0	1	0	0	1	0
江西省人民政府关于建立全科医生制度的实施意见	三、多渠道培养合格的全科医生 (十一)大力开展全科医生转岗培训。通过多渠道培养方式,力争到;00年,全省每个基层医疗卫生机构都有合格的全科医生。对符合条件的基层在岗执业(助理)医师,省卫生厅、省财政厅根据规划,按需对其进行1-;00年的转岗培训,补助标准按国家有关规定和标准执行,加大对安置在基层医疗卫生机构的“三支一扶”支医大学生转岗培训力度。转岗培训以提升基本医疗和公共卫生服务能力为主,在国家认定的全科医生规范化培养基地进行,培训结束通过省卫生厅组织的统一考试,获得全科医生转岗培训合格证书,可按有关规定转为相应资格的全科医师,并可依据医师执业注册暂行办法规定,变更注册为全科医师或助理全科医师。	0	0	1	0	1	0	0	0	0	0	0	0	1	0
安徽省人民政府办公厅关于印发安徽省医疗卫生领域财政事权和支出责任划分改革实施方案的通知	从公共卫生、医疗保障、计划生育、能力建设四个方面,划分我省医疗卫生领域财政事权和支出责任。	0	0	0	0	0	0	0	0	0	0	0	0	0	1
河北省人民政府办公厅关于印发河北省“十四五”医疗卫生服务体系规划的通知	二、总体要求 (二)基本原则。 2.坚持需求导向,平急结合。合理确定医疗卫生机构的数量、规模、布局,提升资源配置效率;立足平时需求和保障重大疫情防控需要,提高平急结合和快速转换能力,维护公共卫生安全。	0	0	0	0	1	0	0	0	0	0	0	0	0	0
云南省人民政府办公厅关于印发全省发展中医药大会重点任务分解方案的通知	七、着力加快中医药产业发展 (三十五)加快提升品牌影响力加强中药品牌培育,选择一批特色鲜明、使用方便、国内外需求旺盛、药味相对简单的代表性品种,按照国际规范进行系统研究开发,形成知名品牌,进入国际国内医药主流市场。集中精力做好名牌产品的生产营销,持续巩固和发展名牌的地位和声誉。力争到;00年,全省中药(民族药)新增无公害/绿色/有机产品认证10个、地理标志保护产品4个、地理标志注册商标2件。(牵头单位:省工业和信息化委;配合单位:省科技厅、农业厅、食品药品监管局、工商局、质监局)	0	0	0	0	0	1	0	0	0	0	0	1	0	0
河南省人民政府办公厅关于印发河南省2009年度主要污染物总量减排计划实施方案的通知	六、保障措施 (一)严格污染减排目标考核,落实减排目标问责制和“一票否决”制。按照省委、省政府关于实行节能减排目标问责制和“一票否决”制的规定,将污染减排作为一项约束性指标,列入全省经济社会发展年度综合考评体系,对没有完成污染物总量减排任务的地方政府领导班子和领导干部,实行严格的问责制和“一票否决”制。	0	0	0	0	0	0	1	0	0	0	0	0	0	0
吉林省人民政府关于加快推进医药健康支柱产业发展的实施意见	二、重点推进工作 (八)完善医疗与健康服务体系。坚持特色发展和整体推进,进一步完善医疗卫生服务体系,形成多元化办医格局,有重点地发展优势学科和病种诊疗,强化基层医疗、康复和护理服务能力,明显提升各类医疗机构服务质量和水平。加快健康养老、医疗保险、健康体检等服务行业发展步伐,建立与经济社会发展水平相适应的健康保险服务体系。到;00年,医疗与健康服务业实现营业收入370亿元。 5.推动健康服务多样化发展。积极开展健康体检及咨询服务,加强各类健康体检、咨询机构建设,引导体检机构提高服务水平。积极开展全民健身活动。建立健全健康保险服务机制。加大健康保险产品创新力度,为参保对象提供多样化选择。	0	0	0	0	1	1	0	1	0	0	0	0	0	0
江苏省人民政府办公厅关于转发省体育局江苏省城市社区“10分钟体育健身圈”建设实施方案的通知	五、组织实施 (四)抓好长效管理。城市社区是居民享受公共体育服务的主要场所,要从满足群众体育生活化需要出发,加强城市社区公共体育设施和服务的长效管理。紧紧抓住开展“10分钟体育健身圈”建设的有利时机,努力打造设施良好、功能完善、管理科学、服务周到的公共体育健身服务圈。突出抓好电子地图绘制、新城区公共体育设施建设、老城区公共体育设施改造、健身组织延伸覆盖、社会体育宣传等重点环节,确保如期完成城市社区“10分钟体育健身圈”建设任务。	0	0	0	1	1	0	0	0	0	0	0	0	0	0
内蒙古自治区人民政府办公厅关于印发自治区2016年度大气污染防治实施计划的通知	三、保障措施 (四)严格考核奖惩 6.;00年12月底812呼和浩特市玉泉区呼市建委供暖处七车间DZL7-00/95/70--AII生活供热103590拆并/改气00.7212	0	0	0	0	0	0	0	0	0	0	0	0	0	1
内蒙古自治区人民政府办公厅关于印发自治区2016年度大气污染防治实施计划的通知	三、保障措施 (二)多渠道筹措治理资金 各级财政安排使用有关资金时,要优先支持列入年度实施计划的污染治理项目,继续将必要的大气污染监测、监管能力建设及执法监督经费纳入预算予以保障。今年自治区本级财政将继续加大对大气污染防治的支持力度,在中央和自治区本级大气污染治理专项资金分配时,采取“以奖代补”等方式,对按时完成大气污染治理任务、环境空气质量改善显著的地区给予奖励。要创新投入机制,建立政府、企业、社会多元化投融资机制,拓宽融资渠道。推进企业绿色信贷、绿色证券,将企业环境信息纳入征信系统,严格限制违法企业贷款和上市融资。加大环保基金支持力度,优先对技术水平高、环境效益好的建设项目给予资金支持。	0	1	0	0	0	0	1	1	0	0	0	1	1	0
河南省人民政府办公厅关于印发河南省2010年度主要污染物总量减排计划实施方案的通知	三、;00年主要污染物新增排放量预测 (二)二氧化硫新增排放量预测。 燃煤火力发电行业:;00年我省发电总量2068亿千瓦时,;00年我省发电量计划增长00%,达到2300亿千瓦时,新增发电量232亿千瓦时。按火力发电量占总发电量的95%计算,;00年我省新增火力发电量为00亿千瓦时。按320克标煤/千瓦时计算,;00年我省燃煤发电增加原煤消耗00万吨。按原煤平均含硫量00%、“三同时”(污染治理设施与主体工程同时设计、同时施工、同时投产)执行率85%、综合脱硫效率80%计算,;00年我省火力发电行业新增二氧化硫排放量约为00万吨。 非电行业:;00年我省单位生产总值能耗预计下降5%左右,达到00吨标煤/万元,;00年我省单位生产总值能耗下降00%,达到00吨标煤/万元。;00年我省生产总值增幅预计为10%,达到18764亿元(;00年价格水平),以此计算;00年我省将新增能源消费188…	0	0	0	0	0	0	0	0	0	0	0	0	0	1
黑龙江省人民政府办公厅关于推进医疗保障基金监管制度体系改革的实施意见	四、健全和完善规范严格的监管执法体系 (十一)推进基金监管规范执法。推行“双随机、一公开”监管机制,确保基金监督检查公开、公平、公正。严格执行行政执法公示制度、执法全过程记录制度和重大执法决定法制审核制度,推进基金监管行政执法规范化建设。完善医疗保障行政处罚程序规定,出台规范医疗保障行政处罚裁量权基准,有效规范执法行为。〔牵头单位:省医保局;责任单位:省司法厅,各市(地)、县(市)政府(行署)〕	0	0	0	0	0	0	1	0	0	0	0	0	0	0
内蒙古自治区人民政府办公厅关于印发自治区2016年度大气污染防治实施计划的通知	三、保障措施 (四)严格考核奖惩 1.;00年12月底724呼和浩特市新城区中化地质矿山总局内蒙古地质勘查院锅炉房生活供热41436拆并/改气00.08841	0	0	0	0	0	0	0	0	0	0	0	0	0	1
甘肃省人民政府办公厅关于2013年上半年省政府环保目标责任书落实情况及污染减排工作进展情况的通报	一、省政府环保目标责任书进展情况 (二)环境质量状况。;00年上半年,全省14个市州政府所在地城市中空气质量达到二级标准的有7个,占50%;达到三级标准的城市有4个,占00%;超过三级标准的城市有3个,占00%。平凉、武威、陇南可吸入颗粒物平均值与上年同期相比有所下降,兰州、白银、酒泉、嘉峪关、金昌、张掖可吸入颗粒物平均值比上年同期均有不同程度上升;14个城市二氧化氮污染浓度较低,与上年相比变化不大,临夏二氧化氮平均浓度低于国家二级标准限值要求,其他城市低于国家一级标准限值要求;金昌、临夏二氧化硫平均值超过国家二级标准限值要求,比上年同期分别上升00%、22%,其他城市二氧化硫平均值符合国家二级标准要求。全省河流水质监测的50个断面中,按功能类别达标的有38个,占监测断面总数的76%,与上年同期持平。国家考核断面大河家桥、五佛寺、葡萄园、玛曲桥断面水质按功能类别达标,长庆桥断面为Ⅳ类水质…	0	0	0	0	0	0	0	0	0	0	0	0	0	1
甘肃省人民政府办公厅印发关于加快中医药特色发展若干措施的通知	六、实施中医药特色人才培养工程 (一)提高中医药教育整体水平。建立以中医药课程为主线、先中后西的中医药类专业课程体系,增设中医疫病课程。逐步增加中医(全科医学领域)专业学位硕士研究生招生计划,到;00年招生规模达到400人/年。推动中医学、中西医临床医学“5+3”一体化培养模式改革,开展中医学、中西医临床医学专业九年制人才培养试点。推动教育部、国家中医药管理局和省政府三方共建甘肃中医药大学,到;00年,力争建设3门左右国家级和20门左右省级中医药一流本科课程。(省教育厅、省卫生健康委)	0	0	1	0	0	1	0	0	0	0	0	0	0	0
宁夏回族自治区人民政府办公厅关于开展大气污染防治工作强化督查的通知	二、核查内容 (一)各地级市人民政府、宁东管委会年度减排计划制定、分解落实情况及重点减排项目实施进展情况。	0	0	0	0	0	0	0	0	0	0	0	0	0	1
重庆市人民政府办公厅关于印发2017年大气污染防治重点工作目标任务分解的通知	六、增强监管能力 完善法律法规 40.①推进出台《重庆市大气污染防治条例》,细化国家法律的部门责任规定,把我市好的做法和经验上升为地方法规。 ②做好《重庆市大气污染防治条例》解读、宣讲、培训和贯彻等工作。 市环保局 各区县(自治县)人民政府,市政府有关部门,有关单位 完善排放标准 41.完成重庆市非道路移动机械大气污染物排放标准的编制工作,开展制订餐饮油烟大气污染物排放标准。 市环保局 市质监局 加强空气污染应急监测 42.在空气质量已超标时期,加强对主城区和***重点大气污染源的环境监测,在1―2月、11―12月重点加密监测火电、水泥、钢铁等重点企业氮氧化物、烟粉尘排放;在6―9月重点加密监测整车制造、汽车配件、印刷包装等涂装企业挥发性有机物排放。 市环保局 各区县(自治县)人民政府 推行差别化电价政策	0	0	0	0	0	0	1	0	0	0	0	0	0	0
河南省人民政府关于印发河南省全民健身实施计划(2011—2015年)的通知	五、组织实施 (一)加强组织领导。本实施计划在省政府领导下,由省体育局会同有关部门、群众组织和社会团体共同实施。各省辖市、县(市、区)政府要结合当地实际,制定本地的《全民健身实施计划》,并责成体育部门会同相关部门和组织共同组织实施。 各级体育部门要切实提高认识,认真履行职责,积极探索全民健身工作的新思路、新办法,加强组织领导,落实政策保障、人员配备、资金投入、监督奖励等措施,并建立目标责任制,签订责任书,实行目标考核。	0	0	0	0	1	0	0	0	0	0	0	0	0	0
辽宁省人民政府办公厅关于印发《政府办基层医疗卫生机构基本药物集中采购实施办法(试行)》的通知	第三章集中采购 第八条基本药物实行以省为单位集中采购、统一配送;发挥集中批量采购优势,招标和采购结合,签订购销合同,一次完成采购全过程,最大限度地降低采购成本,促进基本药物生产和供应。通过建立和规范基本药物采购机制,实现基本药物安全有效、品质良好、价格合理、供应及时,逐步建立起比较完善的基层用基本药物供应保障体系,使群众真正得到实惠。	0	0	0	0	1	0	0	0	0	1	0	0	0	0
江西省人民政府办公厅关于印发《江西省深化医药卫生体制改革2018年下半年重点工作任务》的通知	五、建立完善综合监管制度 30.制定改革完善医疗卫生行业综合监管制度实施意见,建立综合监管协调机制和督察机制。(省卫生计生委、省人社厅、省工商局、省食品药品监管局等部门负责)	0	0	0	0	0	0	1	0	0	0	0	0	0	0
云南省人民政府关于印发云南省“十三五”卫生与健康规划的通知	四、体系支撑 (二)加强全民健康信息化建设 2.建设区域全民健康信息云平台 采取分级部署与云部署相结合的方式,统筹推进省、州市、县三级区域全民健康信息平台建设,逐步实现互联互通、信息共享和业务协同。依托省级全民健康云平台,构建全省人口健康大数据中心,实现全省健康医疗大数据的汇集。探索健康医疗大数据开发应用,选择具备条件的地区和领域先行先试。	1	0	0	0	0	0	0	0	0	0	1	0	0	0
内蒙古自治区人民政府关于印发《内蒙古自治区全民健身实施计划(2011—2015年)》的通知	三、目标任务 (二)主要任务 1.城乡居民身体素质明显提高。统筹城乡、区域和不同人群的体育健身事业发展,不断提高体育健身意识和科学健身水平。进一步推进不同人群国民体质测定工作和体育锻炼达标活动,国民体质测定合格标准的城乡人数比例达到90%,经常参加体育锻炼的人数比例达到35%。	0	0	0	0	1	1	0	0	0	0	0	0	0	0
海南省人民政府办公厅关于印发《海南省“十二五”主要污染物总量减排考核办法》、《海南省“十二五”主要污染物总量减排统计办法》和《海南省“十二五”主要污染物总量减排监测办法》等3个办法的通知	第五条各市县政府、洋浦经济开发区管委会和省直有关部门应当按照年度减排计划及国家总量减排核算有关规定,按时对本行政区域或本部门当年度主要污染物总量减排工作情况开展自查和总结,于次年1月10日前将总结报送省主要污染物总量减排领导小组办公室。	0	0	0	0	1	0	0	0	0	0	0	0	0	0
甘肃省人民政府办公厅关于印发加强全民健身场地设施建设发展群众体育若干措施的通知	三、补齐硬件短板 (四)加强冬季运动场地建设。推广建设室外天然滑冰场、可拆装式滑冰场。鼓励有条件的地区利用公园、城市广场等公共用地,建设以冰雪游憩活动为主的室内外冰雪乐园。鼓励现有滑雪场完善场地配套服务设施,改扩建增容,完善设施功能,提升服务水平。加快推进临洮体育训练基地二期滑冰馆项目建设。(牵头单位:省体育局;责任单位:省发展改革委、省住建厅、省财政厅、省自然资源厅、省林草局,各市州政府、兰州新区管委会)	0	0	0	1	0	0	0	0	0	0	0	0	0	0
山西省人民政府关于印发山西省“十二五”期间深化医药卫生体制改革规划暨实施方案的通知	三、重点任务 (三)积极推进公立医院改革。 3.深入推进试点城市公立医院改革。深入推进公立医院改革试点工作,拓展深化试点内容,创新体制机制,探索建立人事分配、补偿机制,提高服务质量和运行效率。鼓励社会资本对公立医院进行多种形式的公益性投入。以合资合作方式参与改制的不得改变非营利性质。加强国有资产管理,维护职工合法权益。	0	0	0	0	1	0	0	0	0	0	1	1	1	0
河南省人民政府办公厅关于印发河南省促进天使风投创投基金高质量发展实施方案河南省数字经济和生物医药新材料政府引导基金设立方案的通知	二、发展天使风投创投主体 (四)争取外商投资股权投资试点。研究出台合格境外有限合伙人(QFLP)试点政策,依托自由贸易试验区发展跨境投融资,吸引境外投资人和境外资金参与设立市场化母基金,对设立天使风投创投子基金提供外资进入管理便利。(责任单位:省地方金融监管局、商务厅、发展改革委、人行郑州中心支行、河南证监局,郑州、洛阳、开封市政府)	0	0	0	0	0	0	0	1	0	0	1	1	0	0
贵州省人民政府关于批转贵州省主要污染物总量减排统计监测及考核办法的通知	五、污染物排放许可证发放情况 指标定义:根据《责任书》要求,完成对排污单位和城镇生活污水处理厂污染物排放许可证的发放。 数据来源:环保部门。	0	0	0	0	0	0	1	0	0	0	0	0	0	0
天津市人民政府批转市环保局、市发展改革委拟定的天津市"十一五"主要污染物总量减排考核办法的通知	第十条依照《体现科学发展观要求的地方党政领导班子和领导干部综合考核评价试行办法》(中组发〔2006〕14号)的规定,经市人民政府审定后的考核结果,纳入对各区县人民政府和有关责任部门领导班子和领导干部的综合考核环保评价。 考核结果为优秀的,由市人民政府予以通报表彰。 考核结果为未通过的,该地区、该部门的领导干部不得参加年度评奖、不得授予荣誉称号;撤销该地区、该部门获得的市级有关环境保护的荣誉称号;暂停该地区新增主要污染物排放建设项目的环评审批。对未完成市人民政府确定的总量减排计划任务的企业(集团公司),暂停其新增主要污染物排放建设项目的环评审批。 考核未通过且整改不到位或因工作不力造成重大社会影响的,监察部门按照《环境保护违法违纪行为处分暂行规定》(监察部、环保总局令第10号)和《关于印发天津市人民政府行政责任问责制试行办法的通知》(津政发〔2004〕1号)等相关规定追究该地区或部门有关人…	0	0	0	0	0	0	1	0	0	0	0	0	0	0
新疆维吾尔自治区人民政府办公厅关于印发自治区深化医药卫生体制五项重点改革2010年度主要工作安排的通知	二、工作任务 (一)加快推进基本医疗保障制度建设。 3.提高基本医保基金管理水平。主要工作目标: (4)鼓励有条件的地方提高基本医疗保险统筹层次。科学论证、有序开展基本医疗保障经办管理资源整合。探索委托具有资质的商业保险机构经办各类医疗保障管理服务。(人力资源和社会保障厅、卫生厅、保监局负责)	0	0	0	0	0	1	0	0	0	0	0	1	0	0
内蒙古自治区人民政府办公厅关于印发自治区2016年度大气污染防治实施计划的通知	三、保障措施 (四)严格考核奖惩 5.;00年12月底736呼和浩特市新城区内蒙古法官进修学院锅炉房DZL00生活供热2718拆并/改气00.5442	0	0	0	0	0	0	0	0	0	0	0	0	0	1
陕西省人民政府办公厅关于印发省主要污染物排污权有偿使用和交易试点实施方案的通知	三、工作目标 (四)推进产业结构调整。通过开展主要污染物排放指标有偿使用和交易,增强全社会的环境保护意识,调动排污单位的减排积极性,降低污染治理成本,促进产业结构调整和经济转型升级,建立环境保护长效机制,逐步改善环境质量。	0	0	0	0	1	1	0	0	0	0	0	0	0	0
江西省人民政府办公厅关于印发江西省“十三五”中医药发展规划的通知	二、总体要求 (三)发展目标。 --中医药健康服务蓬勃发展。建设国家级中医药健康旅游示范区1个、示范基地2-3个、示范项目30个,打造以中医医疗、养生保健、康复养老、健康旅游为特色的健康小镇10个,培育集团化发展、连锁式经营的中医药养生保健服务企业2-3家。 --中医药继承创新体系不断完善。新建30个国医名师、名老中医药专家及中医学术流派传承工作室,建设10个国家级、50个省部级中医药工程研究中心(工程实验室)、重点实验室等创新平台。引进、培养中医药高层次人才和紧缺人才各100名,其中,力争引进或培养国医大师1-2名、院士1名。建设国家科技创新团队1个、国家一流学科2个以上,以及一批博士后科研流动站、工作站和创新实践基地。 --中医药对外交流合作更加广泛。实施以热敏灸海外推广计划为主的对外合作交流工程,在海外建设热敏灸馆6-10个,岐黄国医外国政要江中体验中心影响力不断扩大。	0	0	1	1	0	1	0	0	0	0	1	1	0	0
云南省人民政府办公厅关于促进“互联网+医疗健康”发展的实施意见	二、主要任务 (一)以为民惠民为目标,让群众获取医疗健康服务更便捷 4.开展便捷化用药服务。探索医疗卫生机构处方信息与药品零售消费信息互联互通、实时共享。医疗卫生机构线上开具的慢性病、常见病处方,经药师审核后,可委托符合条件的第三方机构配送。加强基于互联网的短缺药品信息采集和供应业务协同应用,探索建立区域合理用药点评管理系统,加强对基层医疗卫生机构用药指导。(省卫生健康委、省医保局、省市场监管局负责)	1	0	0	0	1	0	0	0	0	0	0	1	0	0
山东省人民政府关于印发《山东省建立城镇职工基本医疗保险制度实施方案》的通知	五、基金征缴与监管 用人单位必须按月向社会保险经办机构申报应缴纳的医疗保险费数额,经社会保险经办机构核定后,在规定的期限内缴纳医疗保险费。各市地要完善基本医疗保险基金的征缴办法,采取有力措施,保证医疗保险基金及时、足额征缴到位。对用人单位未按规定缴纳医疗保险费的要按《社会保险费征缴暂行条例》(国务院令第259号)予以处罚。 破产企业应按照《中华人民共和国企业破产法》及有关规定,优先偿付欠缴的基本医疗保险费,并按当地退休人员人均医疗费一次性向社会保险经办机构缴纳;00年基本医疗保险费,由社会保险经办机构负责支付其退休人员的基本医疗保险费用。 基本医疗保险基金纳入财政专户,实行收支两条线管理,专款专用,任何单位和个人都不得挤占挪用。社会保险经办机构的事业经费不得从基金中提取,由各级财政预算解决。	0	0	0	0	0	0	1	0	0	0	0	0	1	0
内蒙古自治区人民政府办公厅关于印发自治区2016年度大气污染防治实施计划的通知	三、保障措施 (四)严格考核奖惩 2.;00年12月674通辽市科尔沁区生产32418淘汰00.00.55	0	0	0	0	0	0	0	0	0	0	0	0	0	1
山西省人民政府关于开展城镇居民基本医疗保险试点的实施意见	二、参保范围、筹资水平和费用支付 (五)费用支付。城镇居民基本医疗保险基金的使用要坚持以收定支、收支平衡、略有结余的原则。要合理制定城镇居民基本医疗保险基金起付标准、支付比例和最高支付限额,完善支付办法,合理控制医疗费用。城镇居民基本医疗保险基金重点用于参保居民的住院和门诊大病医疗费用支出。在经济基础较好、有管理能力的试点城市可以探索对参保居民的门诊医疗费用进行统筹,充分依托和利用社区卫生服务体系,探索解决参保居民的门诊医疗费用负担问题。简化统筹基金的共付比例,按定点医疗机构级别的高低,统筹基金支付的比例控制在50%以上。探索适合困难城镇非从业居民经济承受能力的医疗服务和费用支付办法,减轻他们的医疗费用负担。城镇居民基本医疗保险基金用于支付规定范围内的医疗费用,其他费用可以通过补充医疗保险、商业健康保险、医疗救助和社会慈善捐助等方式解决。	0	0	0	0	0	0	0	1	0	0	1	0	1	0
国务院办公厅关于印发第二次全国污染源普查方案的通知	二、普查时点、对象、范围和内容 (三)普查内容。 4.集中式污染治理设施。单位基本情况,设施处理能力、污水或废物处理情况,次生污染物的产生、治理与排放情况。 废水污染物:化学需氧量、氨氮、总氮、总磷、五日生化需氧量、动植物油、挥发酚、氰化物、汞、镉、铅、铬、砷。 废气污染物:二氧化硫、氮氧化物、颗粒物、汞、镉、铅、铬、砷。 污水处理设施产生的污泥、焚烧设施产生的焚烧残渣和飞灰等产生、贮存、处置情况。	0	0	0	0	1	0	0	0	0	0	0	0	0	0
青海省人民政府办公厅转发省卫生厅关于青海省2004年农村牧区新型合作医疗扩大试点工作方案的通知	五、试点形式 在借鉴首批试点县工作经验的基础上,按照《管理办法》,实行以大病统筹为主,大病统筹与家庭账户和医疗救助相结合的模式。扩大试点县根据本地实际,制定实施方案和实施细则,报州(地、市)合管办审核、省合管办复审同意后,由县人民政府批准实施。	0	0	0	0	0	0	0	0	0	0	1	0	0	0
国务院办公厅关于印发控制污染物排放许可制实施方案的通知	七、做好排污许可制实施保障 (十七)加强组织领导。 各地区要高度重视排污许可制实施工作,统一思想,提高认识,明确目标任务,制定实施计划,确保按时限完成排污许可证核发工作。要做好排污许可制推进期间各项环境管理制度的衔接,避免出现管理真空。环境保护部要加强对全国排污许可制实施工作的指导,制定相关管理办法,总结推广经验,跟踪评估实施情况。将排污许可制落实情况纳入环境保护督察工作,对落实不力的进行问责。	0	0	0	0	1	0	1	0	0	0	0	0	0	0
山西省人民政府办公厅关于印发山西省深化医药卫生体制改革2014年重点工作任务的通知	一、加快推动公立医院改革 (一)推进公立医院规划布局调整。按照国家卫生服务体系规划以及卫生资源配置标准,制订区域卫生规划与医疗机构设置规划,并向社会公布。将区域内各级各类医疗机构统一纳入规划,每千常住人口医疗卫生机构床位数达到4张的,原则上不再扩大公立医院规模。进一步明确公立医院保基本的职能,优化结构布局,严格控制公立医院床位规模和建设标准。(省卫生计生委、省发展改革委、省财政厅负责。排在第一位的部门为牵头部门,分别负责为各部门分别牵头,下同)	0	0	0	0	0	0	0	0	1	0	0	0	0	0
内蒙古自治区人民政府办公厅关于印发《内蒙古自治区本级职工基本医疗保险管理办法》等五个办法的通知[附：内蒙古自治区本级职工大额医疗保险管理办法、内蒙古自治区本级职工基本医疗保险费用结算办法、内蒙古自治区本级职工基本医疗保险转诊转院和特殊医疗项目检查及治疗管理办法、内蒙古自治区本级职工基本医疗保险个人账户及社会保障卡管理办法]	第七章附则 第十二条异地安置退休人员和因工作需要驻外工作一年以上的参保人员,在当地定点医疗机构和定点零售药店发生的符合有关规定的门诊、住院或紧急抢救的医疗费用,由本人或家属持外埠就医审批表、所住定点医疗机构或定点零售药店的病历资料或复印件、诊断证明、复式处方、医疗费用结算单等有关凭证到医保局办理支付手续。住院医疗费用按参保所在地住院报销比例执行,门诊医疗费从个人账户中支付。	0	0	0	0	0	0	1	0	0	0	0	0	0	0
青海省人民政府办公厅关于印发青海省医疗卫生服务体系规划(2016—2020年)的通知	第一节配置原则 一、医疗卫生服务体系构架 医疗卫生服务体系的总体结构分为医院、基层医疗卫生机构和专业公共卫生机构。 医院分为公立医院和社会办医院。其中,公立医院分为政府办医院(根据功能定位主要划分为县办医院、市(州)办医院省办医院、部门办医院)和其他公立医院(主要包括军队医院、国有和集体企事业单位等举办医院)。 县级以下为基层医疗卫生机构,分为公立和社会办两类。 专业公共卫生机构划分为政府办专业公共卫生机构和其他专业公共卫生机构(主要包括国有和集体企事业单位举办的专业公共卫生机构)。根据属地层级的不同,政府办专业公共卫生机构划分为县办、市(州)办和省办三类。	0	0	0	0	1	0	0	0	0	0	0	0	0	0
安徽省人民政府办公厅关于印发安徽省药品和医疗器械安全突发事件应急预案的通知	6.保障措施00队伍保障 省应急指挥部成员单位、专家组、药品检验机构、药品不良反应监测机构,以及各市、县的药品应急处置力量,是全省药品安全突发事件应急处置专业队伍。各级政府和有关部门应不断加强业务培训和应急演练,提高队伍素质,提高装备水平,并动员社会团体、企事业单位及志愿者等各种社会力量参与应急处置工作。 00医疗保障 卫生部门负责组建应急专业医疗救治队伍,指定应急救治机构,根据需要及时赶赴现场开展医疗救治。 00交通运输保障 交通、公安等有关部门要保证发生药品安全突发事件时应急交通工具的优先安排、优先调度、优先放行。根据应急处置工作需要,政府相关部门要对事发地现场及相关通道实行交通管制,开设应急救援“绿色通道”,确保应急运输畅通。 00资金保障 药品安全突发事件应急处置工作经费,由同级财政部门予以保障。对事件应急处置急需的资金,事发地政府要统筹安排,在事件处置结束后向相关责任单位追缴。	0	0	0	0	1	0	0	0	0	0	0	0	0	0
安徽省人民政府办公厅关于建立健全医疗保障基金使用监管长效机制的若干意见	二、工作举措 (三)强化社会力量协同监管机制。 20.定期曝光典型案例。严格按照《国家医保局关于建立基金监管重大案情曝光台的通知》要求,通过网站、新闻发布会、微信公众号、广播电视台、报纸等新闻媒体或公共平台,依法依规及时曝光欺诈骗保典型案件,切实增强震慑效应,正确引导社会舆论。(责任单位:省医保局)	0	0	0	0	0	0	1	0	0	0	0	0	0	0
吉林省人民政府办公厅关于印发吉林省进一步加强乡村医生队伍建设实施方案的通知	十、工作要求 (二十四)落实资金投入。县级政府要将乡村医生队伍建设相关经费纳入财政预算。省级财政要对乡村医生队伍建设予以支持,进一步加大对困难地区的补助力度。各市县财政要及时足额下拨乡村医生队伍建设相关经费,确保专款专用,不得截留、挪用、挤占。	0	1	1	0	0	0	0	0	0	0	0	0	1	0
江西省人民政府办公厅关于印发江西省“十三五”中医药发展规划的通知	三、主要任务 (三)全面提升中药产业发展水平。 4.大力推进中药绿色制药。以关键技术和共性技术突破为重点,推进中药工业数字化、网络化、智能化建设,加强集成和工艺创新,提升中药制造现代化、标准化水平。支持开展炮制、提取、浓缩干燥、成型等节能环保中药制药设备研发与产业化。推广中药绿色制造技术和工艺,实现中药药渣的综合利用。	1	0	0	0	0	0	0	0	0	0	0	0	0	0
吉林省人民政府办公厅关于印发吉林省建立和规范政府办基层医疗卫生机构基本药物采购机制实施办法(暂行)的通知	二、建立和规范基本药物采购机制的主要措施 (十二)建立严格的诚信记录和市场清退制度。对供货企业在采购过程中提供虚假证明文件,蓄意抬高价格或恶意压低价格,中标后拒不签订合同,未按合同规定及时配送供货,向采购机构、医疗卫生机构和个人进行贿赂或变相贿赂的,一律记录在案并按以下规定进行处罚:一次违规严厉警告,并限期纠正或整改;逾期不改或二次违规的,由省卫生行政部门将违规企业和法人代表名单及违规情况向社会公布,;00年内不允许该企业及其法人代表参与我省任何药品的招标采购;违反法律的,要依法惩处。对参与以上违法违规行为的有关机构、部门及相关人员要按照法律法规规定予以严惩。	0	0	0	0	0	0	1	0	0	0	0	0	0	0
广东省人民政府办公厅关于印发广东省深化医药卫生体制改革2016年工作要点的通知	七、加强卫生人才队伍建设 (二)全面实施住院医师规范化培训。按规定对45个住院医师规范化培训基地教学实践活动及培训对象给予补助,新增规范化培训住院医师5200名(含中医住院医师),强化住院医师规范化培训基地内涵建设与动态管理,深入开展培训工作评估。加强医院院长职业化培训。(省卫生计生委负责,省财政厅、发展改革委、教育厅、中医药局、人力资源社会保障厅参与)	0	0	1	0	0	0	0	0	0	0	0	0	1	0
宁夏回族自治区人民政府印发关于落实全国地下水污染防治规划(2011—2020年)实施意见的通知	三、主要工作 (八)建立健全地下水环境监管体系。建立健全地下水环境监测体系。在国土资源、水利及环境保护等部门已有的地下水监测工作基础上,充分衔接“国家地下水监测工程”监测网络,整合并优化地下水环境监测布设点位,完善地下水环境监测网络,实现地下水环境监测信息共享。建立重点地区地下水污染监测系统,实现对人口密集和重点工业园区、地下水重点污染源区、重要水源等地区的有效监测;强化水厂的地下水取水检测能力(取水点控)、地下水区域性污染因子和污染风险的识别能力,增加检测项目,提高检测精度,强化地下水水质突变等异常因子识别。	1	0	0	0	0	0	0	0	0	0	0	0	0	0
广西壮族自治区人民政府办公厅关于印发广西促进“互联网+医疗健康”发展实施方案的通知	二、建立健全“互联网+医疗健康”支撑体系 (十)健全“互联网+医疗健康”标准体系。 2.按照国家制定的省统筹区域全民健康信息平台应用功能指引、数据标准的具体要求,依据行业统一的互联互通标准和业务技术规范,加快顶层设计,加强规范指引,推动自治区全民健康信息平台建设,实现核心数据统一采集、标准统一使用、接口统一制定、关键应用统一整合、门户统一集成、资源统一管理、安全统一规划等“七个统一”。(责任单位:自治区卫生计生委)	1	0	0	0	0	0	0	0	0	0	0	0	0	0
福建省人民政府办公厅关于完善公立医疗机构药品集中采购工作的若干意见	二、创新机制 (一)建立目录遴选新机制 3.制定省级药品采购目录遴选办法,以各级医疗机构申报品种重合度为主要依据,结合专家评审意见,综合考虑西药与中成药的合理比例、充分考虑国家基本药物、中药保护品种、急抢救药品、妇儿药品等实际用药的需要,合理编制省级药品采购目录。省级药品目录品种数控制在1800种以内,品规数控制在6000种左右。	0	0	0	0	0	0	0	0	0	1	0	0	0	0
北京市人民政府办公厅转发市体委等《关于加强健身气功活动管理意见》的通知	八、禁止在本市公共场所悬挂、张贴带有愚昧迷信色彩、宣扬功法和神化功法创编人的条幅、图像、徽记及其他标识。	0	0	0	0	0	0	1	0	0	0	0	0	0	0
海南省人民政府办公厅关于印发海南省2016年度大气污染防治实施计划的通知	二、年度工作任务及责任分工 (五)逐步提高环境监管能力,加大环保执法力度。 1.逐步提高环境监管能力。 实施重点工业企业大气污染源在线监控系统建设,加大在线监控设备运行维护,不断提高在线监测覆盖率及自动监控数据传输有效率;加强海口、三亚、儋州污染源自动监控中心建设;做好全省县级以上城市(镇)、重点工业园区的环境空气质量自动监测站的运行维护,加强气态污染物量值溯源和量值传递体系以及颗粒物比对体系建设,购置备用设备,提高监测数据的连续性和科学性。(责任单位:各市县政府、洋浦经济开发区管委会;指导督办单位:省生态环保厅)	0	0	0	1	0	0	1	0	0	0	0	0	0	0
福建省人民政府关于建立全科医生制度的实施意见	一、建立全科医生制度的指导思想、基本原则和总体目标 (三)总体目标。到;00年,在我省初步建立起充满生机和活力的全科医生制度,基本形成统一规范的全科医生培养模式和“首诊在基层”的服务模式,全科医生与城乡居民基本建立比较稳定的服务关系,力争实现城乡每万服务人口有4名全科医生的工作目标,全科医生服务水平全面提高,基本适应人民群众基本医疗卫生服务需求。	0	0	0	0	0	1	0	0	0	0	0	0	0	0
甘肃省人民政府办公厅印发关于加快中医药特色发展若干措施的通知	八、实施民族医药发展工程 (一)健全民族医药服务体系。将民族医药发展纳入民族自治地方经济社会发展规划。加强民族医医疗机构建设,鼓励社会力量举办民族医医院和诊所。到;00年,甘南州建成1个区域藏医医疗中心。在少数民族地区综合医院、中医医院和专科医院推广民族医药技术和方药,将更多疗效确切的民族医药医疗机构制剂在全省调配使用。(省卫生健康委、省发展改革委、省民委、省药监局负责)	0	0	0	0	0	1	0	0	0	0	0	1	0	0
河南省人民政府关于印发河南省2009年医药卫生体制改革实施方案的通知	一、加快推进基本医疗保障制度建设 (一)扩大基本医疗保障覆盖面。;00年全省城镇职工基本医疗保险参保率达到85%以上,参保人数达到900万人;城镇居民基本医疗保险参保率达到80%以上,参保人数达到1000万人。巩固新型农村合作医疗(以下简称新农合)发展成果,参合率继续保持90%以上。 责任单位:省人力资源和社会保障厅、卫生厅、财政厅。	0	0	0	0	0	1	0	0	0	0	0	0	0	0
内蒙古自治区人民政府关于水污染防治行动计划的实施意见	三、重点任务 (二)切实推动经济结构转型升级。 推动污染企业退出。城市建成区内现有钢铁、有色金属、造纸、印染、原料药制造、化工等污染较重的企业应有序搬迁改造或依法关闭。 积极保护生态空间。严格城市规划蓝线管理,城市规划区范围内应保留一定比例的水域面积,新建项目一律不得违规占用水域。严格水域岸线用途管制,土地开发利用应留足河道、湖泊的管理和保护范围,非法挤占的应限期退出。 推进循环发展。加强工业水循环利用。推进矿井水综合利用,加强洗煤废水循环利用。鼓励钢铁、纺织印染、造纸、石油石化、化工、制革等高耗水企业废水深度处理回用。促进再生水利用。以缺水及水污染严重地区城市为重点,完善再生水利用设施,工业生产、城市绿化、道路清扫、车辆冲洗、建筑施工以及生态景观等用水,要优先使用再生水。推进高速公路服务区污水处理和利用。具备使用再生水条件但未充分利用的钢铁、火电、化工、制浆造纸、印染等项目,不得批准其…	0	0	0	0	0	1	0	0	1	0	0	0	0	0
河南省人民政府关于印发河南省2009年医药卫生体制改革实施方案的通知	三、健全基层医疗卫生服务体系 (十四)加强以全科医生为重点的基层医疗卫生队伍建设。实施全科医生培养规划和农村卫生人才培养“51111”工程。采取学历教育、在职培训、到城市大医院进修等多种方式,全面开展全科医生培养培训工作,尽快实现基层医疗卫生机构都有合格全科医生的要求。;00年要结合国家部署适时启动培训规划,培训规划经费分级负担意见由省深化医药卫生体制改革领导小组办公室会同省财政厅、卫生厅提出,并报省政府审定。 责任单位:省发展改革委、卫生厅、财政厅、教育厅、人力资源和社会保障厅、中医管理局。	0	0	1	0	0	1	0	0	0	0	0	0	0	0
广东省人民政府关于印发“十二五”期间深化医药卫生体制改革实施方案的通知	六、落实改革工作任务的保障措施 (四)加大投入,强化保障。各级政府要切实加大投入,在安排年度卫生投入预算时,严格落实“政府卫生投入增长幅度高于经常性财政支出增长幅度,政府卫生投入占经常性财政支出的比重逐步提高”的要求。“十二五”期间政府医药卫生体制改革投入力度和强度要高于2009-;00年医药卫生体制改革投入;基本医保政府补助标准和人均基本公共卫生服务经费标准也要随着经济社会发展水平的提高相应提高。加强资金监督管理,提高资金使用效益,坚决防止各种违法违规使用资金行为。	0	1	0	0	0	0	1	0	0	0	0	0	1	0
内蒙古自治区人民政府办公厅关于印发水污染防治工作方案的通知	二、重点任务 (二)加强城镇生活污染治理 3.推进污泥处理处置 污泥应进行稳定化、无害化和资源化处理处置,开展污泥从产生、运输、储存、处置的全过程监管,禁止处理处置不达标的污泥进入耕地,非法污泥堆放点一律予以取缔,杜绝污泥二次污染。污泥处理处置设施应与污水处理设施统筹建设,因地制宜开展污泥集中处置。;00年底前,现有污泥处理处置设施基本完成达标改造;;00年底前,地级城市污泥无害化处理处置率达到90%以上。(自治区住房城乡建设厅牵头,发展改革委、经济和信息化委、环保厅、农牧业厅等参与)	0	0	0	1	0	1	1	0	0	0	0	0	0	0
吉林省人民政府办公厅关于印发吉林省建立和规范政府办基层医疗卫生机构基本药物采购机制实施办法(暂行)的通知	二、建立和规范基本药物采购机制的主要措施 (四)区别情况分类采购。区分基本药物的不同情况,采取不同的采购方式: 2.对必需但用量小的特殊用药、急救用药,采用邀请招标、询价采购或定点生产的方式采购。	0	0	0	0	0	0	0	0	0	1	0	0	0	0
广西壮族自治区人民政府办公厅关于印发广西促进养老托育服务健康发展三年行动方案（2021—2023年）的通知	三、主要任务 (四)完善养老托育服务综合监管体系。 5.切实防范各类风险。做好突发事件应对能力建设,将养老托育服务纳入公共安全重点保障范围。建立政府购买养老托育机构安全管理服务制度。严防“一老一小”领域虚假投资、欺诈销售、高额返利等形式的非法集资。加强对养老服务领域非法集资的防范、监测和预警。常态化开展防范非法集资教育,指导各市县面向老年人开展经常性非法集资识骗防骗教育宣传工作,增强老年人群体对非法集资诈骗的识别和防范能力。严厉打击面向老年人的非法集资、保健品欺诈等违法犯罪行为,及时曝光侵害老年人合法权益的典型案件,维护老年人合法权益。	0	0	0	0	1	0	1	0	0	1	0	0	0	0
内蒙古自治区人民政府办公厅关于印发自治区国民营养计划(2017—2030年)实施方案的通知	一、总体要求 (三)主要目标。到;00年,营养法规标准体系基本完善;营养工作制度基本健全,自治区、盟市、旗县(市、区)营养工作体系逐步完善,基层营养工作得到加强;食物营养健康产业快速发展,传统食养服务日益丰富;营养健康信息化水平逐步提升;重点人群营养不良状况明显改善,吃动平衡的健康生活方式进一步普及,居民营养健康素养得到明显提高。实现以下目标: --降低人群贫血率。5岁以下儿童贫血率控制在12%以下;孕妇贫血率下降至15%以下;老年人群贫血率下降至10%以下;贫困地区人群贫血率控制在10%以下。 --孕妇叶酸缺乏率控制在5%以下;0-6个月婴儿纯母乳喂养率达到50%以上;5岁以下儿童生长迟缓率控制在7%以下。 --农村牧区中小学生的生长迟缓率保持在5%以下,缩小城乡学生身高差别;学生肥胖率上升趋势减缓。 --提高住院病人营养筛查率和营养不良住院病人的营养治疗比例。 --居民营养健康知识知…	0	0	0	0	0	1	0	0	0	0	0	0	0	0
湖北省人民政府办公厅关于印发加快全省医学教育创新发展实施方案的通知	三、完善保障措施 (三)保障经费投入。统筹各方资金资源,加强对医学教育投入保障。按要求落实医学门类专业生均定额拨款标准、住培标准,将医学学科人才培养、科研创新、实训基地和服务社会等情况作为省“双一流”建设资金分配重要参考。支持相关高校优化支出结构,加大对医学人才培养和医学学科建设的投入力度。(省财政厅牵头,省卫健委、省教育厅配合)	0	1	1	0	0	0	0	0	0	0	0	0	0	0
内蒙古自治区人民政府办公厅关于印发自治区2016年度大气污染防治实施计划的通知	三、保障措施 (四)严格考核奖惩 5.;00年12月513鄂尔多斯市鄂托克旗多尔斯宾馆----供热00淘汰00.00.5	0	0	0	0	0	0	0	0	0	0	0	0	0	1
贵州省人民政府关于批转贵州省主要污染物总量减排统计监测及考核办法的通知	八、重点脱硫项目按期投运率 指标定义:列入《责任书》的重点脱硫项目按期投运比例。 数据来源:环保部门。	0	0	0	0	0	0	0	0	0	0	0	0	0	1
福建省人民政府办公厅关于印发2005年度全省治理“餐桌污染”建设“食品放心工程”工作方案的通知	四、治理饮用水污染 (十九)由省建设厅、卫生厅负责开展对全省各市县自来水水质、二次供水及其设施的监督检查,重点抽查设区市大型市政供水单位设施及水质卫生状况,督促街道居委会、社区、物业管理等开展辖区内二次供水设施的清洗工作,查处违法违规行为。	0	0	0	0	0	0	1	0	0	0	0	0	0	0
海南省人民政府办公厅关于印发《海南省土壤污染防治行动计划实施情况评估和考核办法(试行)》的通知	第九条评估和考核结果经省政府审定后,由省生态环境厅向各市县政府通报,并交由组织部门和审计部门分别作为对各市县领导班子和领导干部综合考核评价、自然资源资产离任审计的重要依据。评估和考核结果将作为土壤污染防治相关资金分配的重要参考依据。 对未通过年度评估或终期考核的市县,要提出限期整改意见,整改完成前,暂停审批有关市县重点行业企业建设项目(民生项目与节能减排项目除外)环境影响评价文件;整改不到位的,要约谈有关市县政府及其相关部门负责人。对土壤环境问题突出、区域土壤环境质量明显下降、防治工作不力、群众反映强烈的市县,要约谈有关市县政府和省级相关部门主要负责人。 对评估和考核结果为优秀和进步较大的市县政府进行通报表扬。	0	0	0	0	1	0	0	0	0	0	0	0	0	0
北京市人民政府办公厅转发市人力社保局市、财政局关于北京市市级公费医疗改革办法的通知	第八条参保人员按照城镇职工基本医疗保险的相关规定选择定点医疗机构。即参保人员自行选择4家定点医疗机构,定点中医、定点专科和A类医疗机构可以直接就诊。在定点医疗机构就医需持社会保障卡。	0	0	0	0	1	0	0	0	0	0	0	0	0	0
内蒙古自治区人民政府办公厅关于印发水污染防治工作方案的通知	四、保障机制 (一)强化责任落实 1.强化政府水环境保护责任 各级地方人民政府是实施本工作方案的主体,对本行政区域内的水环境质量负责。自治区政府成立内蒙古自治区水污染防治工作领导小组,由自治区常务副主席任组长,相关分管副主席和环保厅厅长任副组长,其它28个部门主要负责人为领导小组成员。领导小组办公室设在自治区环保厅,办公室主任由环保厅厅长兼任,办公室副主任和联络员由环保厅总工程师兼任。各盟市政府要加强组织领导,成立水污染防治工作领导小组,确定分流域、分区域、分行业、分年度的重点任务和目标,编制工作方案、年度方案及达标方案,并组织实施。各级政府要不断完善政策措施,加大资金投入,统筹城乡水污染治理,强化监管,确保各项任务全面完成。(自治区环保厅牵头,发展改革委、财政厅、住房城乡建设厅、水利厅等参与)	0	0	0	0	1	0	0	0	0	0	0	0	0	0
云南省人民政府办公厅关于加快发展商业健康保险的实施意见	一、扩大商业健康保险供给 (二)加快发展医疗执业保险。推行医疗责任保险、医疗意外保险、艾滋病等传染病专管人员和医护人员职业综合保险等多种形式医疗执业保险。到;00年底前,全省三级公立医院医疗责任保险参保率达到100%,二级公立医院参保率达到90%以上。积极鼓励支持村卫生室、个体诊所和非公立医疗机构参加医疗责任保险。支持医疗机构和医师个人购买医疗执业保险,医师个人购买的医疗执业保险适用于其合法注册的执业地点。鼓励通过商业保险等方式提高医务人员及艾滋病等传染病专管人员的医疗、养老保障水平以及解决医疗职业伤害保障和损害赔偿等问题。(牵头部门:省卫生计生委,云南保监局;配合部门:省财政厅、综治办)	0	0	0	0	0	1	0	1	0	0	0	0	0	0
内蒙古自治区人民政府办公厅关于印发自治区2016年度大气污染防治实施计划的通知	三、保障措施 (四)严格考核奖惩 3.;00年12月616通辽市科尔沁区华玺玉宫CWSH00-85/60-AX洗浴00.5淘汰00.00.252	0	0	0	0	0	0	0	0	0	0	0	0	0	1
国务院办公厅关于支持社会力量提供多层次多样化医疗服务的意见	二、拓展多层次多样化服务 (十)探索发展特色健康服务产业集聚区。医疗资源和区位等基础条件较好的地方,可以探索以社会力量为主,打造特色鲜明、具有竞争力和影响力的健康服务产业集聚区,更好满足国内外较高层次健康消费需求。坚持合理定位、科学规划,在土地规划、市政配套、机构准入、人才引进、执业环境等方面给予政策扶持和倾斜,积极探索体制机制创新,着力打造健康服务产业集群。有条件的地方可探索医疗与养老、旅游、健身休闲等业态融合发展,健康服务与医药研发制造、医学教育相协同的集聚模式。坚持以市场需求为导向,发挥企业在产业集聚中的主体作用,地方各级政府要统筹好本行政区域内的集聚区差异化发展,并提供必要的公共服务和配套支持。坚决避免脱离实际、一哄而上、盲目重复建设,杜绝简单园区建设或变相搞房地产开发。有关部门要加强跟踪指导,及时总结经验,发挥示范作用。	0	0	1	1	0	0	0	0	1	0	1	1	0	0
云南省人民政府办公厅关于促进医药产业健康发展的实施意见	一、总体要求 (三)发展目标 到;00年,我省医药产业结构进一步优化,产业规模进一步壮大,医药资源开发利用率大幅提高,核心竞争力明显提升;体制机制逐步完善,产业发展环境显著改善;医药产业主营业务收入达到1500亿元,年均增长20%左右。	0	0	0	0	0	1	0	0	0	0	0	0	0	0
河南省人民政府关于印发河南省全民健身实施计划(2011—2015年)的通知	四、保障措施 (七)不断加大科学健身指导力度。健全体质测定服务机构,开展城乡居民日常体质测定和科学技术健身指导。依托全民健身活动中心和各类综合性体育中心,逐步建立省、市、县三级体质测定与运动健身指导站网络,为群众进行体质测定、运动能力评定,提供运动健身指导。引导城乡居民经常参加体育健身活动,不断提高体质健康水平。	0	0	0	0	1	0	0	0	0	0	0	0	0	0
河南省人民政府办公厅关于印发河南省推进工业结构调整打赢污染防治攻坚战工作方案的通知	二、调整优化产业布局 (三)大力推动重点行业布局调整。 2.主要任务: (1)支持各省辖市、省直管县(市)深入分析产业现状,按照“有所为有所不为”原则科学确定主导产业,实施传统产业兼并重组、退城入园和优化布局,改变“小、散、乱”状况,加快企业规模化、产业集群化和装备大型化。 (2)鼓励钢铁企业积极参与全国钢铁行业跨地区、跨所有制兼并重组,重点区域城市钢铁企业要采取彻底关停、转型发展、改造升级、省外搬迁等方式推动转型发展,全省整合建设2个大型钢铁联合企业,发展一批“专、精、特”且规模适中的钢铁企业。 (3)依托洛阳、巩义、长葛市等铝加工产业集聚区,大力发展铝精深加工、再生利用,建设有影响力的千亿级铝加工产业集群。 (4)以河南能源化工集团为主体,建设濮阳、鹤壁、永城、义马市4个国内一流的现代煤化工基地;以合成氨骨干企业为主体,打造河南晋开化工、昊华骏化、心连心化工、金山化工4个以多联产精细…	0	0	0	0	0	0	0	0	1	0	0	0	0	0
吉林省人民政府办公厅关于印发吉林省支持社会力量提供多层次多样化医疗服务实施方案的通知	八、强化组织实施 (二十一)强化考核评估。省卫生计生委、省发展改革委要牵头对各地、各有关部门落实本实施方案的情况进行监督跟踪和评估考核,将落实情况纳入省深化医药卫生体制改革考核以及督查督办重点工作,确保各项政策措施落到实处。对不按规定落实促进社会办医加快发展改革措施的,应及时责令改正,并按规定进行追责。	0	0	0	0	1	0	0	0	0	0	0	0	0	0
重庆市人民政府办公厅关于印发2017年大气污染防治重点工作目标任务分解的通知	加强督查考核 48.建立健全“蓝天行动”督查推进机制,将黄标车淘汰、扬尘整治行动、挥发性有机物治理等纳入政府专项督查,结果纳入年度目标任务考核内容,对污染源整改不力的进行通报、约谈、挂牌督办。 市环保局 主城各区人民政府,市城乡建委、市公安局、市市政委、市政府督查室 对空气质量明显下滑的区县(自治县)进行约谈,督促其制定并公布大气污染防治的整改措施。 市环保局 市政府督查室	0	0	0	0	0	0	1	0	0	0	0	0	0	0
河南省人民政府办公厅关于转发河南省医药卫生体制五项重点改革2010年度主要工作安排的通知	二、工作任务 (四)促进基本公共卫生服务逐步均等化。 2.继续实施重大公共卫生服务项目。主要工作目标: (1)继续对15岁以下的人群补种乙肝疫苗,;00年再补种00万人。(省卫生厅负责) (2)在;00年基础上,再完成适龄妇女宫颈癌检查19万人,乳腺癌检查00万人。对00万名农村孕产妇住院分娩进行补助。继续实施农村生育妇女免费补服叶酸项目。(省卫生厅负责) (3)为00万例贫困白内障患者免费实施复明手术。(省卫生厅负责) (4)完成;00年00万户燃煤污染型氟中毒病区改炉改灶任务。(省卫生厅负责) (5)完成;00年00万户无害化卫生厕所建设任务,做好;00年度25万户无害化卫生厕所建设前期准备工作。(省卫生厅负责) (6)实施艾滋病母婴传播阻断项目。(省卫生厅负责) (7)对重大公共卫生服务项目实施情况进行考核评估。(省卫生厅负责)	0	0	0	0	0	1	0	0	0	0	0	0	0	0
广西壮族自治区人民政府办公厅关于加强基层医疗卫生人才队伍建设的实施意见	七、强化组织保障 (十五)加强经费保障。各级财政要将基层医疗卫生机构公益一类保障、农村订单定向医学生培养、乡村医生补助及社会保障等基层医疗卫生人才队伍建设相关经费纳入年度预算,统筹落实好经费保障。	0	0	1	0	0	0	0	0	0	0	0	0	1	0
青海省人民政府办公厅关于提高2016年度全省城乡居民医疗保险筹资标准的通知	一、城镇居民筹资标准 (二)男性19-59周岁(女性19-54周岁),年财政补助由原来的人均400元提高到460元(省补助413元,市(州)县补助47元),个人缴费标准维持人均150元不变;	0	0	0	0	0	0	0	0	0	0	0	0	1	0
陕西省人民政府办公厅关于印发第一次全省污染源普查方案的通知	四、普查组织及实施 (四)普查员和普查指导员的选聘。 2.普查指导员的数量配备原则。 每10名普查员配备1名普查指导员。	0	0	0	0	1	0	0	0	0	0	0	0	0	0
贵州省人民政府关于批转贵州省主要污染物总量减排统计监测及考核办法的通知	一、清洁生产审核率 指标定义:达到《责任书》中规定的清洁生产审核率的情况。 数据来源:经贸部门、环保部门。	0	0	0	0	0	0	0	0	0	0	0	0	0	1
新疆维吾尔自治区人民政府办公厅关于印发自治区2013年主要污染物排放总量控制计划的通知	二、重点减排项目及预期削减能力 (四)氮氧化物重点减排项目。安排氮氧化物重点减排项目57个,预计减排氮氧化物00万吨(不含机动车减排量,见附件5)。 3.;00年机动车预期淘汰量按照;00年环保部核定的淘汰量计算,预计减排00万吨(见附件5)。	0	0	0	0	0	1	0	0	0	0	0	0	0	0
福建省人民政府办公厅关于印发2005年度全省治理“餐桌污染”建设“食品放心工程”工作方案的通知	七、开展食品安全关键技术应用的综合示范项目建设 (四十三)由省科技厅、经贸委、福州大学负责,农业厅、卫生厅、质监局、环保局、供销社、农科院、福建出入境检验检疫局、厦门大学、福建农林大学和福州、厦门、漳州、泉州、莆田、南平、龙岩、宁德市政府配合,开展蔬菜、茶叶食品安全关键技术综合应用体系建设和食品安全学科与人才培训基地的建设工作。	0	0	1	1	0	0	0	0	0	0	0	0	0	0
山西省人民政府关于印发山西省土壤污染防治工作方案的通知	四、组织实施 (一)加强目标考核,严格责任追究。 1.明确地方政府主体责任。 (104)各地人民政府是土壤污染防治的主体,要分别制定并公布土壤污染防治工作方案,确定工作目标、重点任务及其责任单位,并逐年进行分解实施。要加强组织领导,完善政策措施,加大资金投入,创新投融资模式,强化监督管理,抓好工作落实。各市土壤污染防治工作方案于;00年2月底前报省人民政府备案。 牵头单位:省环保厅 参加单位:省发展改革委、省财政厅、省国土资源厅、省住房城乡建设厅、省农业厅等	0	1	0	0	1	0	1	1	0	0	0	0	0	0
新疆维吾尔自治区人民政府办公厅印发贯彻国务院深化医药卫生体制改革领导小组关于进一步推广深化医药卫生体制改革经验的若干意见的实施方案的通知	五、建立符合行业特点的人事薪酬制度,调动医务人员积极性 6.推进薪酬制度改革。各地可结合实际,按照“允许医疗卫生机构突破现行事业单位工资调控水平,允许医疗服务收入扣除成本并按规定提取各项基金后主要用于人员奖励”等要求,合理确定公立医院薪酬水平,逐步提高诊疗费、护理费、手术费等医疗服务收入在医院总收入中的比例。对工作时间之外劳动较多、高层次医疗人才集聚、公益目标任务繁重、开展家庭医生签约服务的公立医疗机构,在核定绩效工资总量时予以倾斜。加强对医务人员的长期激励,建立以公益性为导向的绩效考核机制,薪酬在保持现有水平的基础上实现适度增长。公立医疗机构在核定的绩效工资总量内根据考核结果自主分配绩效工资。薪酬总量核定和个人绩效工资分配不与医疗机构的药品、耗材、大型医学检查等业务收入挂钩,薪酬分配体现岗位的技术含量、风险、贡献等,严禁给医务人员设定创收指标。基层医疗卫生机构可按照财务制度规定在核定的…	0	0	1	0	0	0	0	0	0	0	0	0	0	0
吉林省人民政府办公厅印发关于改革完善全科医生培养与使用激励机制实施方案的通知	四、具体措施 (五)加强贫困地区全科医生队伍建设。 2.职称晋升政策支持。对长期扎根贫困县农村基层工作的全科医生,可突破学历等限制,破格晋升职称。全科专业住院医师规范化培训合格、取得中级职称后在贫困县农村基层连续工作满;00年的,可经职称评审委员会考核认定,直接取得副高级职称,取得的副高级职称原则上应限定在基层医疗卫生机构聘任,由基层医疗卫生机构向上级医疗卫生机构流动时,应取得全省统一的高级职称。(牵头部门:省人力资源社会保障厅,配合单位:省卫生计生委、省中医药管理局)	0	0	0	0	0	1	0	0	0	0	0	0	0	0
北京市人民政府办公厅转发市人力社保局市、财政局关于北京市市级公费医疗改革办法的通知	第十三条区、县社会保险经办机构负责市级国家机关参保的具体业务工作、医疗费用的审核结算和支付。	0	0	0	0	1	0	0	0	0	0	0	0	0	0
青海省人民政府办公厅转发省卫生厅关于青海省2004年农村牧区新型合作医疗扩大试点工作方案的通知	六、基金筹集与管理 (二)筹资程序。 3.乡镇、村集体扶持资金由乡镇政府负责组织收缴,按时汇集到县合管办基金专户。	0	0	0	0	1	0	0	0	0	0	0	0	0	0
广西壮族自治区人民政府办公厅关于印发广西促进“互联网+医疗健康”发展实施方案的通知	二、建立健全“互联网+医疗健康”支撑体系 (十三)加快完善相关配套政策。 4.强化信息应用系统审查备案机制。对已建成和正在新建的医疗健康信息应用系统进行审查备案,进一步清理不按照国家和自治区标准建设、需要二次录入进行数据采集、无法提供数据互联互通共享和信息安全保障的信息应用系统,以及与业务流程长期脱节、功能可由其他系统替代、使用范围小、频度低的“僵尸”信息应用系统。对以上清理出的信息应用系统,自治区财政不再支持建设和提供运行维护资金。(责任单位:自治区卫生计生委、发展改革委、财政厅)	0	0	0	0	1	0	0	0	0	0	0	0	0	0
内蒙古自治区人民政府办公厅关于做好冬季采暖期原煤燃烧污染治理工作的通知	六、切实加大监管力度 燃煤企业要提前做好环保设施检修工作,确保除尘、脱硫、脱硝设施正常运行和稳定达标排放,有效减少污染物排放量。各级环保部门要加大对燃煤企业的日常监督检查力度,增加环境监察和监测频次,确保其污染防治设施高效运转和达标排放。必要时,对相关企业进行驻厂监察。对超标排放、整治措施不落实的,实施限期整改、停产整治和关停,并依法追究有关人员的责任。	0	0	0	0	0	0	1	0	0	0	0	0	0	0
山东省卫生健康委员会等部门关于印发《山东省公立医疗机构药品采购推行“两票制”实施方案》的通知	五、监督管理 (六)医疗保障部门指导省公共资源交易中心,对卫生健康部门核查认定不执行“两票制”的生产企业,取消其相关药品挂网资格;对不执行“两票制”的配送企业,取消其配送资格。加大对药品价格的监测力度。	0	0	0	0	0	0	1	0	0	0	0	0	0	0
内蒙古自治区人民政府办公厅关于印发自治区2016年度大气污染防治实施计划的通知	三、保障措施 (四)严格考核奖惩 2.;00年年底393乌兰察布市集宁区兴盛源建筑保温材料厂生产供热1150拆改00.00.51	0	0	0	0	0	0	0	0	0	0	0	0	0	1
山东省卫生健康委员会等部门关于印发《山东省公立医疗机构药品采购推行“两票制”实施方案》的通知	五、监督管理 (四)商务部门要加强药品流通行业规划指导,配合有关部门规范药品流通市场秩序。	0	0	0	0	1	0	0	0	0	0	0	0	0	0
吉林省人民政府办公厅关于印发吉林省建立和规范政府办基层医疗卫生机构基本药物采购机制实施办法(暂行)的通知	一、建立和规范基本药物采购机制的目标 对实施基本药物制度的政府办基层医疗卫生机构使用的基本药物(包括省增补品种,下同)实行以省为单位集中采购、统一配送;坚持政府主导与市场机制相结合,发挥集中招标采购优势,最大限度地降低采购成本,逐步建立起比较完善的基本药物供应保障体系,确保基本药物安全有效、品质良好、价格合理、供应及时,让群众真正得到实惠。	0	0	0	0	0	0	0	0	0	1	0	1	0	0
吉林省人民政府办公厅印发关于改革完善全科医生培养与使用激励机制实施方案的通知	五、保障措施 (二)深化医保支付方式改革。依托基层医疗卫生机构推行门诊统筹按人头付费,积极探索将签约居民的门诊基金按人头支付给基层医疗卫生机构或家庭医生团队,对于经基层向医院转诊的患者,由基层医疗卫生机构或家庭医生团队支付一定的转诊费用。充分发挥医保基金的杠杆作用,进一步完善差异化的医保支付政策,通过降低起付线、连续计算起付线、提高向下转诊住院报销比例等措施,合理引导居民到基层就诊。加强医联体(医共体)建设,探索实行医保总额付费,合理引导双向转诊,发挥全科医生和家庭医生团队在医保控费方面的“守门人”作用,推动医疗卫生服务由以治病为中心向以健康为中心转变。(牵头部门:省人力资源社会保障厅、省卫生计生委分别负责,配合单位:省中医药管理局)	0	0	0	0	1	0	0	1	0	0	0	0	0	0
广西壮族自治区人民政府办公厅关于印发广西促进“互联网+医疗健康”发展实施方案的通知	三、加强行业监管和安全保障 (十四)健全医疗质量监管机制。 2.互联网医疗健康服务平台等第三方机构应当确保提供服务人员的资质符合有关规定要求,并对所提供的服务承担责任。“互联网+医疗健康”服务产生的数据应当全程留痕,可查询、可追溯,满足行业监管需求。(责任单位:自治区卫生计生委、公安厅)	0	0	0	0	0	0	1	0	0	0	0	1	0	0
新疆维吾尔自治区人民政府办公厅印发贯彻国务院深化医药卫生体制改革领导小组关于进一步推广深化医药卫生体制改革经验的若干意见的实施方案的通知	二、破除以药补医,建立健全公立医院运行新机制 7.落实政府投入责任。全面落实政府对公立医院的投入政策。按照有关规定,逐步偿还和化解符合规定的公立医院长期债务。(自治区财政厅)	0	0	0	0	1	0	0	0	0	0	0	0	0	0
安徽省人民政府办公厅关于加快发展商业健康保险的实施意见	三、全面推进并规范商业保险机构承办城乡居民大病保险和城乡居民基本医疗保险经办管理服务 (三)增强大病保险抗风险能力。承办大病保险的商业保险机构应设立收入账户和赔付支出账户,由财政部门按规定将大病保险费用划入承办机构的收入账户。承办机构必须将大病保险业务与其他保险业务彻底分开,封闭运行,实现单独核算。探索构建科学合理的大病保险风险分担机制,确保大病保险制度长期稳健运行。对于商业保险机构通过加强医疗机构和医师不当医疗行为管控实现大病保险基金的管理性减支,可以建立合理的惩罚激励机制,对医疗机构和医师的不当医疗行为实行惩戒,对保险机构给予适当奖励。	0	0	0	0	1	0	0	1	0	0	0	0	0	0
海南省人民政府办公厅关于调整城镇居民基本医疗保险有关政策的通知	三、关于区域统筹区城镇居民基本医疗保险政策调整 (五)在参保缴费截止日期之后出生的婴儿,在一个结算年度内,随参保母亲享受城镇居民基本医疗保险待遇,所发生的符合规定的医疗费用按其母亲的待遇支付,但母婴两人享受的统筹基金支付总额不能超过其母亲的最高支付限额。	0	0	0	0	0	0	1	0	0	0	0	0	0	0
内蒙古自治区人民政府办公厅关于印发自治区2016年度大气污染防治实施计划的通知	三、保障措施 (四)严格考核奖惩 7.能力建设项目(包括监测预警体系建设项目)清单 附表1 燃煤锅炉淘汰项目清单 序号盟市旗县(区)单位 名称锅炉 编号锅炉型号锅炉用途规模 (蒸吨)耗煤量(吨/年)淘汰 方式减排量(吨/年)总投资(万元)其中淘汰时间烟粉尘二氧化硫氮氧化物中央资金省级财政资金地市财政资金业主单位自筹银行贷款1包头市包头市土右旗祥隆热力有限公司立式水管常压热水4700清洁能源替代00.;00年2包头市包头市土右旗祥隆热力有限公司立式水管常压热水4清洁能源替代;00年3包头市包头市土右旗内蒙古骆驼酒业九峰山酒厂DZL6-00-AII供热生产61500清洁能源替代00.;00年4包头市包头市土右旗内蒙古骆驼酒业九峰山酒厂DZL6-00-AII供热生产6清洁能源替代;00年5包头市包头市固阳县固阳县第一中学、住宅楼供热锅炉CLSG00-90/70-AII供热61500集中供热00…	0	0	0	0	0	0	0	0	0	0	0	0	0	1
河北省人民政府办公厅关于印发河北省中医药健康服务发展规划(2015—2020年)的通知	四、保障措施 (三)完善监管机制。建立健全中医药健康服务监管机制,推行属地化管理,重点监管服务质量,严肃查处违法行为。建立不良执业记录制度,将中医药健康服务机构及其从业人员诚信经营和执业情况纳入统一信用信息平台,引导行业自律。发展规范化、专业化的第三方认证,推进中医药健康服务规范化发展,为政府监管提供技术保障和支撑。	0	0	0	0	0	0	1	0	0	0	0	1	0	0
河南省人民政府办公厅关于印发河南省2010年度主要污染物总量减排计划实施方案的通知	一、总则 (二)编制依据。 7.《河南省人民政府办公厅关于印发河南省水环境生态补偿暂行办法的通知》(豫政办〔2010〕9号)。	0	0	0	0	0	0	0	0	0	0	0	0	0	1
内蒙古自治区人民政府办公厅关于印发自治区2016年度大气污染防治实施计划的通知	三、保障措施 (四)严格考核奖惩 1.;00年12月底815呼和浩特市玉泉区内蒙古祥隆供热有限公司SZL7-00/115/70-AII生活供热103590拆并/改气00.7212	0	0	0	0	0	0	0	0	0	0	0	0	0	1
广东省人民政府办公厅转发省卫生厅关于我省新型农村合作医疗制度建设情况报告的通知	三、下一步工作建议 (五)加强对农村贫困家庭医疗救助工作。要通过提高农村合作医疗统筹层次,把贫困镇村纳入农村合作医疗制度的覆盖范围,帮助农村困难群众参加农村合作医疗,对合作医疗补助后仍有较大困难的农户给予医疗救助。进一步规范和完善农村合作医疗保障救助基金制度,规范农村合作医疗保障救助基金的使用办法以及申请和批准程序。省财政继续安排资金扶持东西两翼和粤北山区建立农村合作医疗保障救助基金,市、县级财政也要安排一定资金作为农村合作医疗保障救助基金,并列入财政的年度预算。同时,要广泛发动社会力量捐赠,拓宽农村合作医疗保障救助基金的筹集渠道。	0	0	0	0	0	0	0	1	0	0	0	1	1	0
辽宁省人民政府办公厅关于印发辽宁省城乡居民大病保险实施方案的通知	五、抓好组织实施 人力资源社会保障、卫生计生等部门要加强对医疗机构、医疗服务行为和质量的监管,要通过建立分级诊疗制度,引导常见病、多发病患者首先到基层医疗卫生机构就诊,完善双向转诊程序,合理配置医疗资源,促进基本医疗卫生服务均等化;要建立以保障水平、参保人满意度以及大病保险资金使用效率为核心的考核评价指标体系,加强监督检查和考核评估,督促商业保险机构按合同要求提高服务质量和水平。保险监管部门要加强商业保险机构从业资格审查以及偿付能力、服务质量和市场行为监管,依法查处违法违规行为。财政部门要会同相关部门落实利用城乡居民基本医保基金向商业保险机构购买大病保险的财务列支和会计核算办法,强化基金管理。审计部门要按规定进行严格审计。政府相关部门和商业保险机构要切实加强参保人员个人信息安全保障,防止信息外泄和滥用。	0	0	0	0	1	0	1	0	0	0	0	0	0	0
吉林省人民政府办公厅关于印发吉林省支持社会力量提供多层次多样化医疗服务实施方案的通知	六、加大政策支持 (十五)加强财税和投融资支持。支持和鼓励社会办医疗机构以股权融资、项目融资等方式筹集发展资金,支持符合条件的社会办医疗机构上市融资或发行债券,利用多层次资本市场融资。鼓励各类资本以信托投资、保险资管产品等形式支持社会办医疗机构融资。鼓励金融机构根据社会办医疗机构特点创新金融产品和服务方式,加快探索社会办医疗机构以其收益权、知识产权等无形资产作为质押开展融资活动。拓宽信贷抵押担保范围,探索允许社会办医疗机构利用有偿取得的用于非医疗用途的土地使用权和产权明晰的房产等固定资产办理抵押贷款。全面落实国家社会办医疗机构各项税收优惠政策。(省发展改革委、省金融办、省财政厅、省国税局、吉林证监局、吉林保监局、吉林银监局、省地税局分别负责)	0	0	0	0	0	0	0	1	0	0	0	1	0	0
内蒙古自治区人民政府办公厅关于印发《内蒙古自治区本级职工基本医疗保险管理办法》等五个办法的通知[附：内蒙古自治区本级职工大额医疗保险管理办法、内蒙古自治区本级职工基本医疗保险费用结算办法、内蒙古自治区本级职工基本医疗保险转诊转院和特殊医疗项目检查及治疗管理办法、内蒙古自治区本级职工基本医疗保险个人账户及社会保障卡管理办法]	第二章基本医疗保险基金的筹集 第十二条参保人员因工作调动、死亡以及与用人单位终止劳动关系,应缴清其应缴纳的医疗保险费用,并在30日内到医保局办理转换、保管、注销等手续。如不按时办理所发生的医疗费用全部由原单位承担。	0	0	0	0	0	0	1	0	0	0	0	0	0	0
青海省人力资源和社会保障厅关于印发青海省加快推进医疗保险支付方式改革实施方案的通知	六、工作要求 (二)强化沟通协调。各地人力资源社会保障、发展改革、财政、卫生计生、价格等部门要加强沟通协调,广泛听取社会各方面的意见建议,结合实际研究制定支付方式改革的政策措施和工作方案。各地改革的政策措施和工作方案须报省人力资源社会保障厅备案,改革进展情况按季度上报。省人力资源社会保障厅适时专题分析研究出现的新情况、新问题,及时解决有关难点和重点问题。	0	0	0	0	1	0	0	0	0	0	0	0	0	0
山西省人民政府关于印发山西省“十二五”期间深化医药卫生体制改革规划暨实施方案的通知	三、重点任务 (一)加快健全全民医保体系。 4.提高医保管理服务水平。加快推进基本医保和医疗救助即时结算。建立异地就医结算机制。做好城乡医保与医疗救助“一站式”结算。完善医保关系转移接续政策,基本实现职工医保制度内跨区域转移接续,推进各项基本医疗保险制度之间衔接。加强基本医保基金收支管理,居民医保当年结余控制在9个月支付水平以内,累计结余控制在12个月支付水平以内;新农合基金当年结余率控制在15%以内,累计结余控制在25%左右。完善基本医保基金管理监督和风险防范机制,防止基本医保基金透支,保障基金安全。稳步推进基本医保省级统筹。	0	0	0	0	1	0	0	0	0	0	0	0	0	0
吉林省人民政府办公厅印发关于完善省直离休干部医疗费管理意见的通知	吉林省人民政府办公厅印发关于 完善省直离休干部医疗费管理意见的通知 (吉政办发[200316号) 省政府各厅委、各直属机构: 现将《关于完善省直离休干部医疗费管理的意见》印发给你们,请认真贯彻执行。 吉林省人民政府办公厅 二00三年四月八日 关于完善省直离休干部医疗费管理的意见 一年多来,按照吉林省人民政府办公厅《关于印发<吉林省省直离休干部医疗费管理办法(试行)>的通知》(吉政办发[200156号)要求,省直有关部门认真加强医疗费管理,切实保障省直离休干部医疗待遇,各定点医院和定点药店不断提高医疗服务水平和服务质量,离休干部可以有选择地在29家定点医院和7家定点药店就医购药,参加离休干部医疗费统筹的各单位和离休干部比较满意,基本做到了方便就医,因病施治,合理用药,按规定实报实销。但离休干部医疗保障也存在一些问题,主要是医疗服务水平和服务质量还有待进一步提高,个别定点医院管理偏松、医疗费…	0	0	0	0	0	0	0	0	0	0	0	0	0	1
内蒙古自治区人民政府办公厅关于印发自治区深化医药卫生体制改革2016年重点工作任务的通知	四、健全药品供应保障机制 (一)巩固完善基本药物制度。加大监督力度,落实基本药物在各级医疗卫生机构的配备使用政策。加强基本药物临床应用和处方集培训,加大对贫困地区药事服务帮扶力度。推进仿制药质量和疗效一致性评价,做好基本药物全品种抽验工作。继续加强对国家基本药物品种的不良反应监测,及时向社会发布药品安全性信息。开展多种形式的监督检查,对基本药物生产、经营过程中存在的违法违规行为,予以立案查处。(自治区卫生计生委、财政厅、发展改革委、科技厅、经济和信息化委、食品药品监管局分别负责)	0	0	0	0	0	0	1	0	0	0	0	0	0	0
山东省人民政府办公厅关于贯彻国办发〔2015〕13号文件进一步加强乡村医生队伍建设的实施意见	七、保障措施 (二)落实资金投入。县级政府应承担落实资金投入的主体责任,建立以政府为主导的多渠道投入机制,并结合当地实际制定和完善政府补助政策,统筹安排各级政府相关支持资金,将乡村医生队伍建设相关费用纳入财政预算,根据项目实际进展和绩效考核结果及时拨付,确保专款专用,任何部门不得截留、挪用。	0	1	0	0	0	0	0	0	0	0	0	0	1	0
广西壮族自治区人民政府办公厅关于印发广西促进养老托育服务健康发展三年行动方案（2021—2023年）的通知	三、主要任务 (三)提升养老托育服务质量。 2.提高人才要素供给能力。通过自治区、市、县三级联动,充分利用现有各类职业技能培训机构和公共实训基地,加强失能失智人员照护、老年人照护、婴幼儿照护、康复护理服务、饮食起居照料、生活家务料理、意外伤害预防与处理等方面的岗位技能培训,不断提高养老护理员、家政服务员、育婴员、保育员等养老托育服务从业人员职业素质和服务能力,培养初、中、高级梯次分明的技能人才队伍。鼓励全区高等院校和职业院校(含技工院校)设置养老托育服务相关学科专业,结合行业发展动态优化专业设置,完善教学标准,加大培养力度。引进专业人才,组建专家库,促进行业人才交流。到;00年,全区累计培训养老护理员6万人次以上,培训托育从业人员4万人次以上;养老、托育服务机构从业人员接受专业培训率90%以上;全区高等院校和职业院校(含技工院校)的老年医学、老年护理、社会工作、婴幼儿发展与健康管理、婴幼…	0	0	1	0	0	1	0	0	0	0	0	0	0	0
天津市人民政府办公厅关于印发天津市支持社会力量提供多层次多样化医疗服务实施方案的通知	二、拓展多层次多样化服务 (六)全面发展中医药服务。鼓励社会力量充分发挥中医药独特优势,全面提供中医医疗、养生保健、康复、养老、健康旅游等服务。支持有实力的社会办中医诊所等基层机构实行跨区域连锁经营、规模发展。鼓励各区依据自身基础相对集中设置中医门诊部和中医诊所,打造中医药一条街、中医药综合服务楼等中医药集中服务区域,发挥中医治未病优势,提供预防、治疗、疗养、护理、康复等多元化服务。落实《天津市加快推进中医药健康服务发展实施方案(2016-;00年)》,将中医药健康服务融入医疗、养老、旅游、文化、服务贸易等领域。(责任部门:市卫生计生委、市中医药管理局、市商务委、市民政局、市旅游局)	0	0	0	0	0	0	0	0	0	0	0	1	0	0
内蒙古自治区人民政府办公厅关于印发自治区2016年度大气污染防治实施计划的通知	三、保障措施 (四)严格考核奖惩 1.;00年年底290乌兰察布市丰镇市丰镇森林公安居民供暖1110取缔00.00.1	0	0	0	0	0	0	0	0	0	0	0	0	0	1
西藏自治区人民政府关于进一步扶持和促进藏医药事业发展的意见	一、充分认识扶持和促进藏医药事业发展的重要性和必要性 (四)藏医药事业发展面临难得机遇和严峻挑战。中央第五次西藏工作座谈会站在新的历史起点上,对推进西藏实现跨越式发展和长治久安作出了战略部署,明确提出要培育具有地方特色和比较优势的战略支撑产业,促进资源优势转化为经济优势;要加快发展医疗卫生事业,完善藏药标准体系和检验监测体系,积极推进藏药产业化。《国务院关于扶持和促进中医药事业发展的若干意见》,对推动新时期藏医药事业发展提供了政策指导。由于种种原因,我区藏医药事业和藏药产业经过多年的发展,仍然面临着服务面窄、人才短缺、研发不足、技术落后、产业规模小等问题。自治区各级政府及其有关部门要以全面贯彻落实中央第五次西藏工作座谈会精神为契机,从夯实基础、落实政策、深化改革等方面入手,着力推动藏医药事业的新发展。	0	0	0	0	0	0	0	0	1	0	0	0	0	0
辽宁省人民政府办公厅关于印发《政府办基层医疗卫生机构基本药物集中采购实施办法(试行)》的通知	第三章集中采购 第十七条建立严格的诚信记录和市场清退制度。药品生产经营企业有下列行为之一的,记录在案并按以下规定进行处理:一次违规处以警告,并责令限期纠正或整改;逾期不改或再次违规的,由省级卫生行政部门将违法违规企业和法人代表名单及违法违规情况向社会公布,并报国家有关部门,该企业及其法人代表(包括其他省级卫生行政部门公布的违法违规企业及其法人代表);00年内不得参与我省任何药品的招标采购。违反有关法律法规规章的,依法予以处罚。 (五)未按合同规定及时配送供货的;	0	0	0	0	0	0	1	0	0	0	0	0	0	0
广东省人民政府办公厅关于加快推进深化医药卫生体制改革政策落实的通知	二、全面推动县级以下医疗卫生服务能力建设。各有关市、县(市、区)政府是县级以下医疗卫生服务能力建设项目的责任主体,要进一步强化责任担当,制定具体的建设方案和施工计划,加快推进实施。升级建设的47家中心卫生院要尽快形成服务能力。191家县级公立医院升级项目中,28家进入设备配置阶段的要在;00年6月底前全部完成设备配置任务;163家基建工程任务尚未完成的项目要严格按照时间节点推进工程建设,力争在;00年底前基本完成主体基建工程,其中15家装修类项目要在;00年10月底前全部完工。省卫生健康委要继续加强督导督办,及时协调解决项目建设中出现的问题,对推进项目不力、未能按时完成建设任务的市、县(市、区)政府,及时提请省政府进行通报问责。	0	0	0	0	1	1	0	0	0	0	0	0	0	0
内蒙古自治区人民政府办公厅关于印发自治区2016年度大气污染防治实施计划的通知	三、保障措施 (四)严格考核奖惩 9.;00年12月底720呼和浩特市新城区呼和浩特市金和园物业服务有限公司锅炉房QXW00生活供热62154拆并/改气00.63261	0	0	0	0	0	0	0	0	0	0	0	0	0	1
甘肃省人民政府办公厅关于2013年上半年省政府环保目标责任书落实情况及污染减排工作进展情况的通报	四、下一步工作要求 (二)严格环境执法监管力度。各市州要加强对减排设施运行的监管,重点做好已建成和在建的城镇污水处理工程、燃煤电厂、钢铁、水泥、有色、造纸等重点企业在线监控设施验收、有效性审核和数据联网等工作,确保在线监控传输数据的准确性,为污染减排核查提供准确依据。要进一步加强核辐射安全监管,严格环境执法,督促核技术利用单位落实辐射安全防护措施,提高监测和应急能力。	0	0	0	0	1	0	0	0	0	0	0	0	0	0
贵州省人民政府关于批转贵州省主要污染物总量减排统计监测及考核办法的通知	第九条各级人民政府要保证承担本辖区内污染源监测工作的各级环境监测站的相关工作条件,配备和充实相关学历的专业技术人员,保证在职人员的继续教育和短期专业技术提高培训、设备能力建设的购置补充和更新、工作和实验用房、交通工具的供给、工作必须的经费保障等方面制定切实可行的计划并予以落实,特别要切实保证直接为污染减排统计、监测和考核服务的污染源监督性监测工作费用,补助国控和省控重点污染源自动监控系统的建设和运行费用,将其纳入各级人民政府的财政预算。承担监测任务的各级环境监测机构监测方法必须采用国家标准方法或环保行业标准方法,并按照国家和地方技术规范要求实行质量保证和质量控制,做好数据的整理统计和上报工作。	0	0	0	0	0	0	1	0	0	0	0	0	0	0
福建省人民政府办公厅关于印发福建省第一次全国污染源普查方案的通知	四、普查组织及实施 (二)组织机构 2.制定和组织实施全省污染源普查各阶段工作方案;	0	0	0	0	1	0	0	0	0	0	0	0	0	0
天津市人民政府关于印发天津市"十二五"期间深化医药卫生体制改革规划暨实施方案的通知	三、进一步健全全民医保体系 (一)巩固扩大基本医保覆盖面。继续巩固全民医保发展成果,职工和居民基本医疗保险参保率稳定在95%以上。重点做好农民工、非公有制经济组织从业人员、灵活就业人员、个体工商户参保工作。	0	0	0	0	1	0	0	0	0	0	0	0	0	0
陕西省人民政府办公厅关于印发陕西省医药监督管理局职能配置内设机构和人员编制规定的通知	四、人员编制 省药品监督管理局机关行政编制38名。局领导职数3名,其中:局长1名,副局长2名。总药剂师1名(副局级)。处级领导职数13名(含机关党委专职副书记)。	0	0	0	0	0	0	0	0	0	0	0	0	0	1
内蒙古自治区人民政府办公厅关于印发2016年度水污染防治计划的通知	三、重点任务 (七)全力保障水生态环境安全。 4.配合环境保护部完成《重点流域水污染防治“十三五”规划》编制工作。各盟市要以水环境问题为导向,识别水质超标、生态敏感、风险突出的控制单元作为优先单元,筛选工程项目,编制优先控制单元污染防治方案。着力消除重污染水域。到;00年底,通过采取控源截污、垃圾清理、清淤疏浚、生态修复等综合治理措施,消除总排干入黄口断面等劣五类断面。(自治区环保厅牵头,自治区发展改革委、经济和信息化委、财政厅、住房城乡建设厅、水利厅等部门参与)	0	0	0	0	1	1	0	0	0	0	0	0	0	0
吉林省人民政府办公厅关于印发吉林省深化医药卫生体制改革2012年主要工作安排的通知	二、工作任务 (五)着力推进公共卫生六大体系建设。 3.推进传染病防治体系建设。进一步提升传染病监测、检测防治能力。加强免疫规划,实施安全规范接种。(省卫生厅、发展改革委、财政厅负责)	0	0	0	0	1	0	0	0	0	0	0	0	0	0
内蒙古自治区人民政府办公厅关于印发自治区支持社会力量提供多层次多样化医疗服务实施方案的通知	二、主要任务 (二)进一步扩大市场开放。 8.放宽市场准入。落实医疗卫生服务体系规划、医疗机构设置规划、大型医用设备配置规划,完善规划调控方式,优化配置医疗资源,促进社会办医加快发展。对符合规划条件和准入资质的,不得以任何理由限制。个体诊所设置不受规划布局限制;对社会办医疗机构配置大型医用设备合理放宽规划预留空间。在审批专科医院等医疗机构设置时,将审核重点放在人员资质与技术服务能力上。积极落实国家眼科等医疗机构基本标准和新型机构标准,满足群众健康需求和社会办医发展需要。(自治区卫生计生委负责)	0	0	0	0	0	0	0	0	0	0	0	1	0	0
医疗纠纷预防和处理条例	第二章医疗纠纷预防 第九条 医疗机构及其医务人员在诊疗活动中应当以患者为中心,加强人文关怀,严格遵守医疗卫生法律、法规、规章和诊疗相关规范、常规,恪守职业道德。 医疗机构应当对其医务人员进行医疗卫生法律、法规、规章和诊疗相关规范、常规的培训,并加强职业道德教育。	0	0	0	0	0	0	1	0	0	0	0	0	0	0
福建省人民政府办公厅关于印发2005年度全省治理“餐桌污染”建设“食品放心工程”工作方案的通知	四、治理饮用水污染 (二十二)由省水利厅负责继续协调有关部门实施《福建省村村通水工程建设规划》,推进“千万农民饮水工程”建设,建成村级供水工程1500个。	0	0	0	1	0	1	0	0	0	0	0	0	0	0
广西壮族自治区人民政府办公厅关于印发广西促进“互联网+医疗健康”发展实施方案的通知	一、健全“互联网+医疗健康”服务体系 (二)发展“互联网+”公共卫生服务。 2.充分利用居民电子健康档案、电子病历、膳食消费、环境因素、流行病学因素、虫媒监测等数据,开展大数据分析。加强对各种传染病、慢性病、肿瘤、心脑血管等疾病的智能监测和精准预测,提高重大疾病防控和突发公共卫生事件应对能力。(责任单位:自治区卫生计生委)	1	0	0	0	1	0	0	0	0	0	0	0	0	0
福建省人民政府办公厅关于印发2005年度全省治理“餐桌污染”建设“食品放心工程”工作方案的通知	八、其他有关分工 (五十八)由省食品药品监管局负责构建食品安全信息平台,组织起草《福建省食品安全信息管理办法》,规范和统一食品安全信息的汇集和发布。开展奶制品和蔬菜两个品种规范信息发布试点工作。	0	0	0	0	1	0	0	0	0	0	1	0	0	0
浙江省人民政府办公厅转发省劳动保障厅、省财政厅关于浙江省国家公务员医疗补助实施意见的通知	五、医疗补助经费管理和监督 医疗补助经费要专款专用、单独建账、单独管理,与基本医疗保险基金分开核算。医疗补助经费当年有结余的,应当结转下一年度使用。 医疗保险经办机构负责医疗补助的经办工作,要严格执行有关规章制度并建立健全国家公务员医疗补助经费的各项内部管理制度和审计制度。医疗补助的经办工作要与基本医疗保险制度相衔接,方便国家公务员就诊就医。 劳动保障部门要加强对医疗保险经办机构的指导与监督管理;财政部门要制定医疗补助经费的财务、会计管理制度,加强财政专户管理,及时监督检查补助经费的分配和使用;审计部门要加强对医疗补助经费的审计工作。	0	0	0	0	1	0	0	0	0	0	0	0	0	0
海南省人民政府办公厅关于印发海南省污染水体治理三年行动方案的通知	四、保障措施 (二)加强行业监管,落实部门责任。 省政府相关职能部门要按照部门职责,负责做好部门职责范围内的生态环境保护工作。各部门要按照职责分工针对相关牵头工作事项,分解到本部门的年度工作计划中部署落实,并加强对市县政府工作的督促指导,确保各项工作得到有效落实。各部门要加强沟通,密切配合,共享信息,定期向领导小组办公室报送工作进度,形成政府主导、部门联动、全社会共同参与的水污染治理工作格局。	0	0	0	0	1	0	0	0	0	0	0	0	0	0
陕西省人民政府办公厅关于印发省主要污染物排污权有偿使用和交易试点实施方案的通知	四、试点范围、对象及交易模式 (二)试点主要污染物。试点种类为“十二五”国家控制的二氧化硫、化学需氧量、氮氧化物和氨氮污染物4项约束性指标。以二氧化硫作为首批交易试点,逐步开展化学需氧量、氮氧化物和氨氮污染物的交易。	0	0	0	0	0	0	0	0	0	0	1	0	0	0
河南省人民政府办公厅关于印发河南省推进工业结构调整打赢污染防治攻坚战工作方案的通知	六、加强工业资源综合利用 (一)推进固体废物处理处置及综合利用。 2.主要任务: (1)开展大宗工业固体废物资源化利用,在濮阳市、平顶山市宝丰县、南阳市镇平县开展静脉产业园试点。 (2)建设一批工业资源综合利用基地,大力推进煤矸石、尾矿、冶炼渣、粉煤灰、炉渣、工业副产石膏、赤泥、化工废渣等工业固体废物综合利用。对不能资源综合利用的,要强化固体废物环境污染防治,严格落实“三防”(防扬散、防流失、防渗漏)措施,防止对大气、水体、土壤环境造成污染。属于危险废物的,应交由具有相应处置资质的危险废物经营单位进行处置利用,切实保障环境安全。 (3)发布再生资源综合利用规范企业名单,大力推进新能源汽车动力蓄电池回收利用和铅酸蓄电池回收处置工作,推进水泥窑协同处置城市生活垃圾和工业固体废弃物示范试点工作。指导开展工业固体废物资源综合利用评价,落实综合利用税收优惠政策。	0	0	0	1	0	0	0	1	0	0	1	0	0	0
吉林省人民政府关于加快推进医药健康支柱产业发展的实施意见	二、重点推进工作 (四)发展壮大生物健康材料、保健食品与用品产业。立足长白山资源优势和制药基础,以市场需求为导向,加快培育生物健康材料,发展壮大保健食品产业,形成特色板块和新的经济增长点。到;00年,生物健康材料、保健食品与用品产业实现销售产值200亿元。 4.营养素补充剂和生物技术保健食品开发。依托制药和科研优势,开发氨基酸、微量元素等营养素补充剂,以及活性肽、胶原蛋白等生物技术保健食品。	1	0	0	0	0	1	0	0	0	0	0	1	0	0
国务院关于印发“十二五”期间深化医药卫生体制改革规划暨实施方案的通知	四、巩固完善基本药物制度和基层医疗卫生机构运行新机制 (八)加快推进基层医疗卫生机构信息化。 在试点基础上,以省为单位,建立涵盖基本药物供应使用、居民健康管理、基本医疗服务、绩效考核等功能的基层医疗卫生信息系统,提高基层医疗卫生服务水平。到;00年,基层医疗卫生信息系统基本覆盖乡镇卫生院、社区卫生服务机构和有条件的村卫生室。	1	0	0	0	1	1	0	0	0	0	0	0	0	0
青海省人民政府办公厅关于印发青海省医疗卫生服务体系规划(2016—2020年)的通知	医疗卫生服务体系建设要根据群众健康需求,合理确定各类医疗卫生资源的配置目标。充分征求有关部门和社会各界的意见,并与当地经济社会发展规划、城乡规划、土地利用总体规划、国防卫生动员需求等进行有效衔接,合理控制资源总量标准及公立医院单体规模,各地可以在强基层的基础上,根据实际需要对不同级别、类型机构床位的比例关系进行适当调整。各市(州)区域卫生规划起草和论证完成后,须经省卫生计生行政部门同意并报本级人民政府审批,确保规划的可行性、可操作性和权威性。 及时发布机构设置和规划布局调整等信息,将纳入规划作为建设项目立项的前提条件。所有新增医疗卫生资源,特别是公立医院的设置和改扩建、病床规模的扩大、大型医用设备的购置,无论何种资金渠道,必须按照要求和程序,严格管理。建立公立医院床位规模分级审核备案和公示制度,新增床位后达到或超过1500张床以上公立医院,其床位增加报国家卫生计生委备案(中医类医院同时报…	0	0	0	1	1	0	0	0	0	0	0	0	0	0
山西省人民政府关于印发山西省土壤污染防治工作方案的通知	二、主要任务 (三)实施农用地分类管理,保障农业生产环境安全。 2.切实加大保护力度。 (13)全省产粮(油)大县、蔬菜产业重点县、国家现代农业示范区和省级现代农业示范县,;00年底前由所在县(市、区)人民政府组织制定土壤环境保护方案,严格保护土壤环境质量,保障“米袋子”“菜篮子”质量安全。 牵头单位:省农业厅、省环保厅 参加单位:省发展改革委、省财政厅、省国土资源厅、省水利厅等	0	0	0	0	1	0	0	0	0	0	1	0	0	0
吉林省人民政府办公厅关于印发吉林省进一步加强乡村医生队伍建设实施方案的通知	八、完善配套政策,建立健全乡村医生养老和退出机制 (十六)完善乡村医生养老政策。分类解决我省乡村医生养老保险问题。对聘用到乡镇卫生院统一管理的在村卫生室执业的执业(助理)医师,按规定参加职工基本养老保险;对目前在村卫生室执业的乡村医生(持有《乡村医生执业证书》),可在户籍地参加城乡居民基本养老保险,待考取执业(助理)医师资格后,可与乡镇卫生院签订劳动合同并按规定参加职工基本养老保险;对年满60周岁的乡村医生,采取补助等多种形式,妥善解决生活保障困难问题,进一步提高养老待遇,具体办法另行制定。(牵头部门:省人力资源社会保障厅,配合部门:省财政厅、省卫生计生委)	0	0	1	0	0	0	0	0	0	0	0	0	1	0
山西省人民政府办公厅关于印发山西省大气污染防治2013年行动计划的通知	二、重点任务 (二)应启动的任务。 1.启动钢铁企业、水泥企业及燃煤锅炉除尘设施升级改造工作,将燃煤采暖锅炉除尘改造任务分解到各县(市、区),开展项目前期工作。(省环境保护厅)	0	0	0	0	1	0	0	0	0	0	0	0	0	0
国务院关于建立全科医生制度的指导意见	三、逐步建立统一规范的全科医生培养制度 (十三)改革临床医学(全科方向)专业学位研究生教育。 从;00年起,新招收的临床医学专业学位研究生(全科方向)要按照全科医生规范化培养的要求进行培养。要适应全科医生岗位需求,进一步加强临床医学研究生培养能力建设,逐步扩大全科方向的临床医学专业学位研究生招生规模。	0	0	1	0	0	0	0	0	0	0	0	0	0	0
河北省人民政府关于改革药品医疗器械审评审批制度的实施意见	二、主要任务 (五)及时发布审批相关信息。认真落实《河北省人民政府办公厅关于印发河北省工业领域推进创新驱动发展实施方案(2015-;00年)的通知》(冀政办字〔2015〕50号)精神,促进监管与创新、成果与产业的对接,严控低水平重复、生产工艺落后的仿制药生产和申报,鼓励市场短缺药品医疗器械的研发和生产。根据国家有关部委公布的限制类和鼓励类药品审批目录,及时向社会或申请人公开药品医疗器械审批清单、注册申请信息、审批进度和结果,接受社会监督。	0	0	0	0	1	0	0	0	0	0	0	0	0	0
山西省人民政府办公厅关于印发山西省深化医药卫生体制改革2014年重点工作任务的通知	重点解决筹资机制不健全、重特大疾病保障机制不完善、医疗服务监管尚需加强、支付方式改革有待深化等问题,进一步巩固完善全民医保体系。;00年三项基本医保参保(合)率稳定在95%以上,城镇居民医保和新农合人均政府补助标准达到320元;个人缴费同步新增20元。城镇居民医保和新农合政策范围内住院费用支付比例达到75%以上。适当提高城镇居民医保和新农合门诊统筹待遇水平。重点任务是:	0	0	0	0	1	1	0	0	0	0	0	0	1	0
天津市人民政府批转市环保局、市发展改革委拟定的天津市"十一五"主要污染物总量减排考核办法的通知	第三条"十一五"主要污染物总量减排的责任主体是各区县人民政府和有关责任部门。各区县人民政府和有关责任部门要把主要污染物排放总量控制指标分解落实到各相关责任单位和重点排污单位,并将其纳入经济社会发展"十一五"规划,加强组织领导,落实项目和资金,严格监督管理,确保实现主要污染物减排目标。	0	0	0	0	0	0	1	0	0	0	0	0	0	0
河南省人民政府办公厅关于加快发展商业健康保险的实施意见	一、总体要求 (二)基本原则。 --以人为本,保障供给。把提升人民群众健康素质和保障水平作为发展商业健康保险的根本出发点和落脚点,充分发挥商业健康保险在满足多样化健康保障和服务需求方面的作用,建设结构合理、高效运行的多层次医疗保障体系。 --政府引导,市场驱动。强化政府制度建设、政策规划和市场监管等职责,通过政策引导,发挥市场在资源配置中的决定性作用,促进商业保险机构不断增加健康保障供给,提高服务质量和效率。 --改革创新,协同发展。深化商业健康保险体制机制改革,运用现代科技,创新管理服务,拓宽服务领域,延长服务链条,推进健康保险同医疗服务、健康管理与促进等相关产业融合发展。	0	0	0	0	0	1	0	0	0	0	0	0	0	0
山西省人民政府办公厅关于印发山西省焦化行业压减过剩产能打好污染防治攻坚战行动方案的通知	三、重点任务 (二)全面清理整顿已备案焦化项目。 省工信厅负责指导各市全面清理整顿已备案焦化项目备案文件及产能置换确认手续,不合规文件予以撤销。各市压减过剩焦化产能工作方案报省政府审核通过前,暂停办理全省焦化项目备案及产能置换确认手续。焦化产能置换确认及焦化项目备案权限收归省级行业主管部门,淘汰压减产能与焦化升级改造项目建设合并审批。压减过剩产能行动过程中,列为压减对象的焦化产能禁止进行交易,也不得用于备案大型焦化项目。	0	0	0	0	1	0	0	0	0	0	0	0	0	0
国务院办公厅关于印发深化医药卫生体制改革2014年重点工作任务的通知	二、积极推动社会办医 (十一)加快推进医师多点执业。 出台推进医师多点执业的意见,进一步简化程序,推动医务人员保障社会化管理,消除阻碍医师有序流动的不合理规定,完善鼓励多点执业的政策措施。 (卫生计生委、人力资源社会保障部、发展改革委、中医药局负责)	0	0	0	0	1	0	0	0	0	0	0	0	0	0
河南省人民政府办公厅关于印发河南省推进工业结构调整打赢污染防治攻坚战工作方案的通知	一、总体要求 (一)指导思想。以习近平新时代中国特色社会主义思想为指导,深入贯彻党的十九大精神,认真落实全国生态环境保护大会和省委十届六次全会决策部署,立足能源原材料大省实际,牢固树立绿水青山就是金山银山发展理念,牢牢把握“绿色减量、创新提质”转型方向,推行更严更高的环保、能耗、安全、质量、技术等标准,着力压减过剩和低效产能,着力推进智能化、绿色化改造,着力发展先进制造,着力推进动能转换,加快形成高效、清洁、低碳、循环的绿色制造体系,实现经济发展同生态文明建设的统一。	0	0	0	0	0	1	0	0	0	0	0	0	0	0
山西省人民政府办公厅关于印发山西省大气污染防治2015年行动计划的通知	四、保障措施 (五)推进信息公开。 省环境保护厅继续做好每月公布11个设区市空气质量排名工作。各设区市要在当地主要媒体上及时发布空气质量监测信息。各级环境保护部门和企业要主动公开新建项目环境影响评价、企业污染物排放、治理设施运行情况等环境信息,接受公众监督。涉及群众利益的建设项目,应充分听取公众意见。建立重污染行业企业环境信息强制公开制度。	0	0	0	0	1	0	0	0	0	0	0	0	0	0
内蒙古自治区人民政府办公厅关于印发2016年度水污染防治计划的通知	四、组织保障 (一)明确责任主体。 各地区对本地区水污染防治工作负总责,要加强组织领导,明确任务目标,逐级分解落实,完善政策措施,建立长效机制,加大资金投入,系统推进水污染治理工作。各相关部门要落实责任分工,密切配合,形成合力,全力推进各项工作任务。各类排污单位要落实污染治理主体责任,加强环保设施建设和运行管理,开展自行监测,确保完成治污减排目标任务,落实环境风险防范等责任。(自治区环保厅牵头,自治区国资委参与)	0	0	0	0	1	0	0	0	0	0	0	0	0	0
山西省人民政府关于开展城镇居民基本医疗保险试点的实施意见	山西省人民政府关于开展城镇居民基本医疗保险试点的实施意见 (晋政发[200737号) 各市、县人民政府,省人民政府各委、厅,各直属机构,各大中型企业: 为了逐步建立覆盖城乡全体居民的医疗保障体系,根据《国务院关于开展城镇居民基本医疗保险试点的指导意见》(国发[200720号)精神,结合我省实际,制定如下实施意见:	0	0	0	0	0	0	0	0	0	0	0	0	0	1
河南省人民政府办公厅关于印发河南省国民营养计划实施方案(2018—2030年)的通知	四、加强组织实施 (一)强化组织领导。各级政府要结合本地实际,强化组织保障,细化工作措施,将国民营养计划实施情况纳入政府绩效考评内容,确保取得实效。各相关部门要密切协作,齐心协力,强化营养专业人才队伍能力建设,不断提升营养工作能力和水平。各级卫生健康部门要会同有关部门,按照职责分工,加强督查评估,确保各项工作任务落到实处。	0	0	0	0	1	0	0	0	0	0	0	0	0	0
重庆市人民政府办公厅关于进一步加强医疗保障基金监管严厉打击欺诈骗保行为的通知	二、严厉打击欺诈骗取医疗保障基金行为 (一)突出打击重点。各区县要针对不同监管对象多发、高发的违规行为特点,聚焦重点、分类打击、对应施策。 对定点医疗机构,要进一步按照其服务特点确定监管重点。对二级及以上公立医疗机构,重点查处分解收费、超标准收费、重复收费、套用项目收费、不合理诊疗等行为;对基层医疗机构,重点查处串换药品、诊疗项目、耗材和挂床住院等行为;对社会办医疗机构,重点查处诱导参保人住院,虚构医疗服务、伪造医疗文书票据、挂床住院、盗刷社保卡等行为。 对定点零售药店,重点查处聚敛盗刷社保卡、诱导参保人购买化妆品、生活用品等行为。 对参保人,重点查处伪造虚假票据报销、冒名就医、使用社保卡套现或套取药品、耗材倒买倒卖等行为。对医保经办机构(包括承办基本医保和大病保险的商保机构),要加强监督检查,重点查处内审制度不健全、基金稽核不全面、履约检查不到位、违规办理医保待遇、违规支付医保费用以及…	0	0	0	0	0	0	1	0	0	0	0	0	0	0
辽宁省人民政府关于印发辽宁省土壤污染防治工作方案的通知	二、工作目标 (一)总体目标。到;00年,全省土壤污染加重趋势得到初步遏制,土壤环境质量总体保持稳定,农用地和建设用地土壤环境安全得到基本保障,土壤环境风险得到基本管控。到;00年,全省土壤环境质量稳中向好,农用地和建设用地土壤环境安全得到有效保障,土壤环境风险得到全面管控。到本世纪中叶,土壤环境质量全面改善,生态系统实现良性循环。	0	0	0	0	0	1	0	0	0	0	0	0	0	0
海南省人民政府办公厅关于印发海南省区域统筹区城镇居民基本医疗保险实施办法的通知	第四章基本医疗保险待遇 第十四条霍乱、鼠疫等甲类传染病的医疗费用由统筹基金全额支付。卫生行政部门确认的暴发性、流行性传染病的医疗费用由人民政府拨专款解决。	0	0	0	0	0	0	1	0	0	0	0	0	0	0
海南省人民政府办公厅关于印发海南省区域统筹区城镇居民基本医疗保险实施办法的通知	第七章奖惩 第三十四条参保人有以下行为之一的,除向其追回统筹基金已支付的医疗费用外,视情节轻重,给予批评教育;涉嫌犯罪的,移交司法机关处理: (五)其他违反城镇居民基本医疗保险管理规定的。	0	0	0	0	0	0	1	0	0	0	0	0	0	0
海南省人民政府办公厅关于进一步完善政府办基层医疗卫生机构编制、人事和收入分配机制的指导意见	四、完善财政补偿和收入分配改革 (一)落实人员经费。 各市县要严格按照有关文件要求,编内人员基本工资由市县财政纳入当年预算统筹并全额安排。绩效工资由服务收入和财政补助共同负担。具体分担比例由市县政府根据本地基层医疗卫生机构收支运行情况和财力情况自行确定。加快探索和完善按服务数量或服务人口定额补偿的方式落实补助资金办法。 由于客观因素导致人员招聘不到位,基层医疗卫生机构实际在编在岗人数低于编制数90%的按编办核定编制数的90%核定工资总量,超出实际在编在岗人数的人员经费部分,由基层医疗卫生机构自主用于实际在岗人员经费支出。当实际在编在岗人数高于编制数90%时,按实际在编在岗人数核定工资总量。	0	0	0	0	0	0	0	0	0	0	0	0	1	0
江苏省政府办公厅关于印发江苏省“十三五”食品药品安全规划的通知	三、主要任务 (二)加强食品药品监管法规标准体系建设。 3.加强监管理论政策研究。围绕有效履行食品药品安全监管职能、推进食品安全城市创建、强化基本药物质量监管、完善药品供应保障体系、推动医药产业转型升级等重大问题,以软课题研究等为载体,从政策理论、法律法规、对策措施等不同层面加强战略性、前瞻性研究,为提高科学决策和科学监管水平提供智力支持。	0	0	0	0	0	0	1	0	0	0	0	0	0	0
贵州省人民政府办公厅转发省民政厅等单位关于进一步完善医疗救助制度全面开展重特大疾病医疗救助工作的实施意见的通知	一、完善医疗救助制度 (一)明确救助范围。城乡医疗救助实行属地管理,救助对象为具有当地常住户籍或具有居住证且在当地连续居住;00年以上的以下十类人员: 5.精准扶贫建档立卡贫困人口中的大病患者;	0	0	0	0	0	0	1	0	0	0	0	0	0	0
陕西省人民政府办公厅关于印发2010年度主要污染物总量减排实施方案的通知	二氧化硫新增排放量预测分为火电和非电两部分。火电行业二氧化硫新增00万吨;非电行业二氧化硫新增00万吨,合计新增00万吨。	0	0	0	0	0	0	0	0	0	0	0	0	0	1
内蒙古自治区人民政府办公厅关于印发水污染防治工作方案的通知	二、重点任务 (一)狠抓工业污染防治 1.取缔“十小”企业 开展全区装备水平低、环保设施差的小型工业企业排查工作,编制取缔“十小”企业年度计划。;00年底前,全部取缔不符合国家产业政策和环保要求的小型造纸、制革、印染、染料、炼焦、炼硫、炼砷、炼油、电镀、农药等严重污染水环境的“十小”生产项目。(自治区经济和信息化委、环保厅牵头,国土资源厅、能源局等参与,地方各级人民政府负责落实,以下均需地方各级人民政府落实,不再列出)	0	0	0	0	0	1	0	0	0	0	0	0	0	0
河南省人民政府关于印发河南省全民健身实施计划(2011—2015年)的通知	二、目标任务 (三)体育健身设施明显改善。全省各类体育场地达到5万个以上,人均体育场地面积达到00平方米以上。各省辖市和50%以上的县(市、区)建有“全民健身活动中心”。60%以上的街道(乡镇)、社区(行政村)建有便捷、实用的体育健身设施。有条件的公园、绿地、广场建有体育健身设施。在全省规划建设20个全民健身户外活动基地、20个“雪炭工程”、300所青少年体育俱乐部、200个城市社区体育俱乐部、1000条健身路径和10000个农民体育健身工程。改善各类公共体育设施的无障碍条件,各类体育设施的开放率和利用率有较大提高。形成各级各类体育设施布局合理、互为补充、覆盖面广、普惠性强的网络化格局。	0	0	0	1	0	1	0	0	0	0	0	0	0	0
内蒙古自治区人民政府办公厅关于印发自治区2016年度大气污染防治实施计划的通知	三、保障措施 (四)严格考核奖惩 9.;00年12月底802呼和浩特市玉泉区内蒙古监狱管理局服刑人员矫治办公室DZL00-00/95/70--AII生活供热41436拆并/改气00.08841	0	0	0	0	0	0	0	0	0	0	0	0	0	1
青海省人民政府办公厅关于印发青海省医疗卫生服务体系规划(2016—2020年)的通知	第一节完善医疗卫生服务体系功能 二、人才使用 实行公立医院人员总量控制,推行聘用制度和岗位管理制度,建立能进能出、能上能下的灵活用人机制。建立符合医疗行业特点的人事薪酬制度,实行绩效工资制,健全绩效考核体系,充分发挥卫生骨干人才的作用。研究制定稳定边远少数民族地区卫生人才的相关政策,着力缓解边远地区聘不到人,留不住人的现象。力争到;00年基本建立起卫生人力资源布局和结构合理,能够基本满足全省居民医疗卫生服务需求,可持续性发展的卫生人才培养和使用创新机制。	0	0	1	0	0	1	0	0	0	0	0	0	0	0
河北省人民政府办公厅印发关于支持医药产业发展若干措施的通知	一、加快创新研发和产业化 (三)支持医疗器械产业化。对获得创新医疗器械特别审查程序的医疗器械项目,择优列入省级科技计划的,按规定给予省级科技专项经费支持;对通过创新医疗器械特别审查程序,新获得三类医疗器械注册证且在省内落地的产业化项目,择优纳入省高技术产业化项目计划,给予不超过项目固定资产投资20%、最高不超过2000万元的省战略性新兴产业专项资金支持。推动医疗装备进入《河北省重点领域首台(套)重大技术装备产品公告目录》,符合条件的企业产品投保经中国银保监会备案的首台(套)重大技术装备综合保险,省级财政按不高于3%的费率上限及实际投保年度保费的80%给予补贴,时间按保险期限据实核算,不超过;00年。(责任单位:省科技厅、省发展改革委、省药品监管局、省财政厅、省工业和信息化厅)	0	1	0	0	0	0	0	0	1	0	0	0	1	0
青海省人民政府办公厅关于印发青海省公立医疗机构推行“先住院后结算”服务模式实施方案(试行)的通知	四、甲方须在乙方出院前1-2天内向乙方或乙方家属告知其住院期间个人应承担的大致数额,以备乙方筹款结账。	0	0	0	0	0	0	1	0	0	0	0	0	0	0
辽宁省人民政府关于印发辽宁省“十三五”期间深化医药卫生体制改革实施方案的通知	二、重点任务 (六)统筹推进相关领域改革。 2.创新卫生人才使用机制,完善岗位设置管理制度,推行公开招聘制度,实行全员聘用制度,实现人员分类管理。改善从业环境和薪酬待遇,促进医疗资源向基层和农村流动。继续实施全科医生特岗计划。对医疗卫生机构单独制定绩效工作总量核定办法,允许医疗卫生机构突破现行事业单位工资调控水平,允许医疗服务收入扣除成本并按规定提取各项基金后主要用于人员奖励。合理确定医疗卫生机构编外人员待遇,逐步实现同岗同薪同待遇。严禁给医务人员设定创收指标,医务人员薪酬不得与药品、耗材、检查、化验等业务收入挂钩。基层医疗卫生机构内部绩效分配可采取设立全科医生津贴等方式,向承担签约服务等临床一线任务的人员倾斜。落实艰苦边远地区津贴、乡镇工作补贴政策,绩效工资分配向基层倾斜。创新人才评价机制,改革完善以岗位职责要求为基础,以品德、能力、业绩为导向,符合卫生人才特点的科学化、社会化评价机制…	0	0	1	0	0	0	0	0	0	0	0	0	1	0
河南省人民政府办公厅关于印发河南省推进工业结构调整打赢污染防治攻坚战工作方案的通知	九、加强组织领导,强化政策保障 (一)夯实工作责任。各省辖市、省直管县(市)政府对本地推进工业结构调整打赢污染防治攻坚战工作负总责,要加强组织领导,结合本地实际,制定工业结构调整实施方案,落实任务举措。工业企业是实施工业结构调整的责任主体,要抢抓机遇、积极主动,严格依法依规实施绿色化转型。省工业和信息化厅、发展改革委、生态环境厅等省直有关部门要根据职责分工加强指导,完善相关政策措施。	0	0	0	0	1	0	0	0	0	0	0	0	0	0
吉林省人民政府办公厅关于印发吉林省深化医药卫生体制改革2012年主要工作安排的通知	二、工作任务 (四)统筹推进相关领域改革。 40.继续做好10类国家基本公共卫生服务项目,着力提高服务质量、居民知晓率和满意度。城乡居民健康档案规范化电子建档率达到60%以上,高血压、糖尿病患者规范化管理人数分别达到136万、38万。将排查发现的所有重性精神病患者纳入管理范围。加强国家免疫规划疫苗接种工作。提高流动人口以及农村留守儿童和老人公共卫生服务可及性。加强健康促进与教育,倡导健康的生活方式,引导科学就医和安全合理用药。(省卫生厅、财政厅、中医药局负责)	0	0	0	0	1	0	0	0	0	0	0	0	0	0
广东省人民政府关于印发“十二五”期间深化医药卫生体制改革实施方案的通知	三、巩固完善基本药物制度和基层医疗卫生机构运行新机制,继续加强基层服务网络建设 (四)规范基本药物采购机制。 1.坚持质量优先、价格合理,进一步完善基本药物质量评价标准和评标办法,既要降低虚高的药价也要避免低价恶性竞争,确保基本药物安全有效、供应及时。(由省卫生厅、物价局、食品药品监管局、经济和信息化委、人力资源社会保障厅负责)	0	0	0	0	1	0	0	0	0	0	0	0	0	0
内蒙古自治区人民政府办公厅关于印发自治区2016年度大气污染防治实施计划的通知	三、保障措施 (四)严格考核奖惩 9.;00年12月底692呼和浩特市新城区内蒙古榕达房地产开发有限责任公司锅炉房QXW00生活供热62154拆并/改气00.63261	0	0	0	0	0	0	0	0	0	0	0	0	0	1
福建省人民政府办公厅关于印发福建省第一次全国污染源普查方案的通知	按照全面普查、突出重点的原则,本次污染源普查的污染物种类为对环境影响较大、对污染防治具有普遍意义的污染物。具体是:	0	0	0	0	0	0	0	0	0	0	0	0	0	1
海南省人民政府办公厅关于印发海南省区域统筹区城镇居民基本医疗保险实施办法的通知	第七章奖惩 第三十三条定点医疗机构及其工作人员有下列行为之一的,视其情节轻重,按有关规定予以处理;涉嫌犯罪的,移交司法机关处理: (七)违反城镇居民基本医疗保险用药规定,开大处方、假处方的;	0	0	0	0	0	0	1	0	0	0	0	0	0	0
甘肃省人民政府办公厅关于2012年上半年省政府环保目标责任书落实情况及污染减排工作进展情况的通报	三、存在的主要问题 (一)污染减排形势依然严峻。 1.城镇污水处理工程建设依然滞后,不能充分发挥减排作用。责任书中要求今年建成并正常投运的新建或改扩建污水处理工程有30个。上半年,只有玉门市污水处理厂技改升级工程、成县污水处理厂灾后重建工程和环县污水处理工程等3个项目按期投运并通过了环保验收,加上;00年已建成的民勤县和黄羊镇污水处理工程外,其余25个项目还未达到年度减排目标要求,部分污水处理厂管网建设不完善,管理不规范,运行不正常,达不到环保验收条件;要求年内建成的9个城镇污水处理厂脱氮除磷改造工程均未建成,其中敦煌市和武都区等2个城镇污水处理厂脱氮除磷改造工程还未开工建设;要求年内开工建设的13个新建城镇污水处理工程中,榆中县夏官营污水处理厂配套管网工程及海石湾、窑街、古浪县、庄浪县、崇信县、镇原县、瓜州县、临夏县、东乡县污水处理工程等10个项目尚未开工;已建成的西峰污水处理厂及再生…	0	0	0	0	0	1	0	0	0	0	0	0	0	0
国务院关于印发“十二五”期间深化医药卫生体制改革规划暨实施方案的通知	七、建立强有力的实施保障机制 (一)强化责任制。 地方各级政府要把医药卫生体制改革作为一项全局性工作,加强对规划实施的组织领导,建立健全责任制和问责制,形成政府主要领导负总责,分管常务工作和卫生工作的领导具体抓,各有关部门分工协作、密切配合、合力推进的工作机制,确保规划顺利实施。各地区、各部门要围绕规划的总体目标和重点任务细化年度任务,制定工作方案,落实责任制,把规划的重点任务落到实处。建立规划实施动态监测、定期通报制度,开展规划实施评估。	0	0	0	0	1	0	0	0	0	0	0	0	0	0
内蒙古自治区人民政府办公厅关于印发自治区国民营养计划(2017—2030年)实施方案的通知	二、完善实施策略 (二)加强营养能力建设。 加强营养科研能力建设。加大营养科研研究力度,加快建立基于自治区实际的人群营养与相关疾病数据库。研究制定营养相关疾病的防控技术及策略。开展营养与健康、营养与社会发展的经济学研究。加强营养与健康科研机构建设,以自治区级营养专业机构为基础,积极争取建立自治区级营养专项重点实验室。加强营养健康基础研究、应用研究和转化医学研究,鼓励科研机构、高等院校和企业积极开展食品、营养与健康的各类研究,推动科技成果转化和适宜技术应用与推广。	1	0	0	1	0	0	0	0	0	0	0	0	0	0
青海省人民政府关于印发青海省城镇居民基本医疗保险试点工作指导意见的通知	四、试点的基本内容 (六)监督管理 3.实行基本医疗保险工作考核和评价制度。实行工作考核制度,由政府有关部门定期进行专项考核。建立基本医疗保险评价指标体系,对医疗保险目标的实现程度、医疗保险效益、工作效率进行定期评价,定期督导考核,科学评价,及时发现和解决问题,总结经验,完善政策措施,规范运行,不断巩固和发展居民医保制度。	0	0	0	0	1	0	0	0	0	0	0	0	0	0
西藏自治区人民政府办公厅关于进一步加强乡村医生队伍建设的实施意见	西藏自治区人民政府办公厅关于进一步加强乡村医生队伍建设的实施意见 (藏政办发〔2012〕14号) 各行署、拉萨市人民政府,自治区各委、办、厅、局: 为认真贯彻《国务院办公厅关于进一步加强乡村医生队伍建设的指导意见》(国办发〔2011〕31号),进一步加强我区乡村医生队伍建设,保障广大农牧区群众基本医疗和公共卫生服务的公平性和可及性,实现“保基本、强基层、建机制”的战略目标,经自治区人民政府同意,结合我区实际制定本实施意见。	0	0	0	0	0	0	0	0	0	0	0	0	0	1
海南省人民政府关于印发《海南自由贸易港博鳌乐城国际医疗旅游先行区临床急需进口医疗器械管理规定》的通知	第六条省药品监督管理部门对申报资料组织评估,决定是否准予进口,将结果告知申请医疗机构,并将相关信息按季度报送国家药品监督管理部门。	0	0	0	0	0	0	1	0	0	0	0	0	0	0
山西省人民政府关于印发山西省土壤污染防治工作方案的通知	二、主要任务 (一)开展土壤污染调查,掌握土壤环境质量状况。 2.建设土壤环境质量监测网络。 (2)统一规划、整合优化现有监测站点和点位,建立土壤环境质量监测网络,充分发挥环保、农业、国土资源行业监测机构作用,按照统一的标准规范开展监测和评价,并建立数据集成共享机制,实现数据互补互联共享,客观、准确反映土壤环境质量及环境风险。;00年底前,完成土壤环境质量国控监测点位设置。根据我省产业分布情况,补充具体加密监测点位,并根据实际工作需要,针对土壤中生物富集性或对人体健康危害大的污染物,机动增加监测项目,提高监测频次。;00年底前,实现土壤环境质量监测点位所有 县(市、区)全覆盖。 牵头单位:省环保厅 参加单位:省财政厅、省国土资源厅、省农业厅等	0	0	0	0	0	1	0	0	0	0	0	0	0	0
湖北省人民政府关于表彰2009年度全省污染减排和环保专项治理工作先进集体和先进个人的通报	三、合格单位 荆州市人民政府十堰市人民政府黄冈市人民政府 恩施自治州人民政府仙桃市人民政府天门市人民政府 神农架林区人民政府 ;00年度主要污染物总量减排工作 突出贡献单位名单 省委办公厅省人大城环委省政府办公厅 省政协人资环委省委宣传部省发改委 省经信委省监察厅省财政厅 省环保厅省住建厅省统计局 省物价局华中电监局省电力公司 ;00年度湖北省环境保护专项治理工作 先进集体名单 武汉市人民政府黄石市人民政府襄樊市人民政府 荆州市人民政府鄂州市人民政府黄冈市人民政府 随州市人民政府恩施自治州人民政府仙桃市人民政府 神农架林区人民政府省政府办公厅省发改委 省经信委省监察厅省财政厅 省环保厅省住建厅 ;00年度湖北省污染减排工作 先进个人名单 省直部门 白富平易发明陈国良成文心程保国严宓党军强 常华诚廖天李新龙王广耀刘宏伍旭李柏林 李琴谢松文徐晶华王玉珏彭良斌肖本绪马育锋 魏娜张富安刘正中付春…	0	0	0	0	0	0	0	0	0	0	0	0	0	1
医疗纠纷预防和处理条例	第三章医疗纠纷处理 第四十二条 医疗纠纷人民调解委员会及其人民调解员、卫生主管部门及其工作人员应当对医患双方的个人隐私等事项予以保密。 未经医患双方同意,医疗纠纷人民调解委员会、卫生主管部门不得公开进行调解,也不得公开调解协议的内容。	0	0	0	0	0	0	1	0	0	0	0	0	0	0
内蒙古自治区人民政府办公厅关于印发自治区2016年度大气污染防治实施计划的通知	三、保障措施 (四)严格考核奖惩 5.;00年年底406乌兰察布市集宁区中铁十九局集团第五工程有限公司集宁制梁厂生产供热4450拆改00.355	0	0	0	0	0	0	0	0	0	0	0	0	0	1
吉林省人民政府办公厅关于加快发展健身休闲产业的实施意见	四、组织实施 (三)加强人才队伍建设。加强健身休闲产业管理、运营和服务人才培养,加大高端人才引进,探索“产学研用”一体化人才培养模式,高校要创造条件设置体育产业专业、健身休闲体育产业课程,依托高校培养健身休闲产业人才。加强健身休闲人才培育的国际交流和合作,积极引进国际先进运营管理团队。	0	0	1	0	0	0	0	0	0	0	0	0	0	0
山东省人民政府关于印发《山东省建立城镇职工基本医疗保险制度实施方案》的通知	七、加强医疗服务管理 省劳动和社会保障厅会同省卫生、财政、物价等有关部门,按照国家制定的基本医疗服务范围、标准,基本医疗保险药品目录、诊疗项目、诊疗服务设施标准,制定我省相应的实施标准以及定点医疗机构和定点药店的管理办法。 基本医疗保险实行定点医疗机构和定点药店管理。社会保险经办机构要严格按照国家和省制定的定点医疗机构和定点药店资格审定办法,按照中西医并举,基层、专科和综合医疗机构兼顾,方便职工就医的原则,负责确定定点医疗机构和定点药店,要同定点医疗机构和定点药店签定的有关基本医疗服务范围、项目、费用结算等内容的合同,明确各自的责任、权利和义务。在确定定点医疗机构和定点药店时,要引进竞争机制,职工可到用人单位选择的定点医疗机构就医、购药,也可持处方在定点药店购药。定点医疗机构和定点药店要规范医药行为,提供优质服务,保证医疗服务和药品质量;要建立监督检查和考核制度,对违反国家规定和合同内容…	0	0	0	0	1	0	1	0	0	0	0	0	0	0
江苏省残疾预防和残疾人康复实施办法	第二章残疾预防 第十八条农业农村、市场监督管理等部门应当加大对农产品和食品中致病性微生物、农药兽药残留、污染物质以及其他危害人体健康物质的检测和监管力度,有效防范、妥善应对农产品、食品安全事件。 承担药品监督管理的部门应当依法查处制售假冒伪劣药品行为,加强疫苗质量、药品不良反应监测和报告的监督管理。	0	0	0	0	0	0	1	0	0	0	0	0	0	0
上海市人民政府关于印发《上海市全民健身实施计划(2011－2015)》的通知	三、目标任务 (二)主要任务 3.组织网络体系更加健全。探索并逐步形成体育行政部门、全民健身指导中心、社区文化活动中心(站)、体育社会工作者、社会体育指导员等构成的全民健身组织网络体系。建立并推行社区体育社工服务制度。体育健身俱乐部或协会实现社区全覆盖。基层体育组织的数量不断扩大,社区健身团队达到15000支。	0	0	0	0	1	0	0	0	0	0	0	0	0	0
河南省人民政府办公厅关于健全重特大疾病医疗保险和救助制度的实施意见	四、夯实医疗救助托底保障功能 (三)合理确定基本救助水平。按救助对象家庭困难情况,分类设定年度救助起付标准(以下简称起付标准)、救助比例、年度最高救助限额。困难群众具有多重特殊身份属性的,按“就高不就低"的原则享受救助,不得重复救助。参加职工基本医疗保险的救助对象,参照以下标准执行。 1.住院救助。对特困人员、低保对象、返贫致贫人口,住院救助不设起付标准。低保边缘家庭成员、农村易返贫致贫人口的住院救助起付标准按所在统筹地区上一年度城乡居民人均可支配收入的10%左右确定,因病致贫重病患者的住院救助起付标准按所在统筹地区上一年度城乡居民人均可支配收入的25%左右确定。对在定点医疗机构发生的住院费用,经居民基本医保、大病保险支付后的政策范围内自付费用,给予特困人员不低于90%的救助,给予低保对象、返贫致贫人口不低于70%的救助,给予低保边缘家庭成员、农村易返贫致贫人口、因病致贫重病患者不低于6…	0	0	0	0	0	0	0	0	0	0	0	0	1	0
贵州省人民政府关于批转贵州省主要污染物总量减排统计监测及考核办法的通知	第二条本办法适用于对各市(州、地)人民政府(行署)“十一五”期间主要污染物总量减排完成情况的考核。 本办法所称主要污染物,是指《国民经济和社会发展第十一个五年规划纲要》确定的实施总量控制的两项污染物,即化学需氧量和二氧化硫。	0	0	0	0	0	0	1	0	0	0	0	0	0	0
青海省人民政府办公厅关于印发青海省2017年度水污染防治实施方案的通知	二、重点任务 (七)水生态环境安全保护。 8.全面开展排污口整治。;00年底前,全面规范整治排入河流、水库、湖泊、排水沟的工业、生活污水直排口。开展农灌退水口、泄洪口的综合整治,实施生态阻隔、污水净化、地表径流蓄积等设施建设,最大限度减少对水体的污染负荷。(省环境保护厅牵头,省水利厅、省发展改革委、省住房城乡建设厅参与,各相关市州政府落实。)	0	0	0	0	0	1	0	0	0	0	0	0	0	0
辽宁省人民政府关于印发辽宁省“十三五”期间深化医药卫生体制改革实施方案的通知	;00年,各级各类公立医院全面推开综合改革,初步建立决策、执行、监督相互协调、相互制衡、相互促进的管理体制和治理机制。到;00年,基本建立权责清晰、管理科学、治理完善、运行高效、监督有力的现代医院管理制度,建立维护公益性、调动积极性、保障可持续的运行新机制和科学合理的补偿机制。	0	0	0	0	1	1	0	0	0	0	0	0	0	0
山西省人民政府关于印发山西省土壤污染防治工作方案的通知	二、主要任务 (二)推进土壤污染防治地方立法,制定完善山西省地方标准规范。 1.加快推进地方立法。 (5)积极开展立法前期调研论证工作,研究制定土壤污染防治地方性法规。 牵头单位:省法制办、省环保厅 参加单位:省经信委、省国土资源厅、省住房城乡建设厅、省农业厅、省林业厅等	0	0	0	0	0	0	1	0	0	0	0	0	0	0
河北省人民政府办公厅关于印发河北省“十四五”医疗卫生服务体系规划的通知	七、打造特色鲜明的中医药服务体系 (五)强化中药产业支撑。提升中药材品质,引导重点品种种植,倡导中医药企业自建或以订单形式联建稳定的中药材生产基地。推进中药制造数字化,加强技术集成和工艺创新,提升中药装备制造水平,加速中药生产工艺、流程的标准化、现代化。 2.中医特色医疗机构建设项目:支持市级中医医院中医综合服务能力建设,推进邯郸、唐山、秦皇岛等市建设中医特色重点医院。建设一批标准化县级中医医院。到;00年,实现社区卫生服务中心和乡镇卫生院全部设置国医堂、配备中医医师。	1	0	0	1	0	1	0	0	0	0	0	0	0	0
吉林省人民政府办公厅关于印发吉林省医疗卫生服务体系规划(2015－2020年)的通知	第二章 目标原则和适用范围 第二节原则 四、坚持行业系统整合,提升医疗卫生服务水平 促进医疗卫生系统合作共享,加强全行业监管与属地化管理,统筹城乡、区域资源配置,统筹当前与长远,统筹预防、医疗和康复,坚持中西医并重,注重发挥医疗卫生服务体系的整体功能,提升基层医疗卫生能力建设,加强科研、人才等基础建设,扩大优质医疗卫生资源。	1	0	1	1	1	0	0	0	0	0	0	0	0	0
吉林省人民政府办公厅印发关于改革完善全科医生培养与使用激励机制实施方案的通知	四、具体措施 (四)全面支持全科医生职业发展。 9.增强全科医生职业荣誉感。鼓励各地按照党和国家有关规定,对长期扎根基层、作出突出贡献的全科医生给予表彰奖励,在享受国务院政府特殊津贴人员推选和“全国杰出专业技术人才”“全国先进工作者”“全国五一劳动奖章”以及省内有关评优评先活动等评选工作中,向基层全科医生倾斜,提升全科医生职业荣誉感和社会地位。鼓励各地组织开展全科技能竞赛等活动,对优秀全科医生给予适当奖励,提升综合技能和社会信任度。奖励要坚持精神奖励与物质奖励相结合,以政府奖励为导向,单位奖励为主体,社会奖励为补充。(牵头部门:省卫生计生委,配合单位:省委组织部、省人力资源社会保障厅、省中医药管理局、省总工会)	0	0	1	0	0	0	0	0	0	0	0	0	1	0
重庆市人民政府办公厅关于印发重庆市进一步深化基本医疗保险支付方式改革实施方案的通知	一、总体要求 (三)主要目标。 ;00年起,进一步加强医保基金预算管理,全面推行总额预算管理下以总额控制和按病种付费为主的多元复合式医保支付方式;贯彻落实100个单病种付费,加强单病种临床路径管理,合理制定并动态调整单病种医保支付标准;探索将日间手术、恶性肿瘤放化疗日间病房等纳入医保支付范围;选择部分医疗机构开展按疾病诊断相关分组(DRGs)付费试点;完善按人头、按床日等多种付费方式。到;00年,医保支付方式改革覆盖所有医疗机构及医疗服务,全市范围内普遍实施适应不同疾病、不同服务特点的多元复合式医保支付方式,按项目付费占比明显下降。	0	0	0	0	0	1	0	0	0	0	1	0	0	0
福建省人民政府办公厅关于印发2005年度全省治理“餐桌污染”建设“食品放心工程”工作方案的通知	八、其他有关分工 (五十六)由省委宣传部协调指导各新闻媒体和省联席会议成员单位,进一步加强治理“餐桌污染”、建设“食品放心工程”的舆论宣传工作。	0	0	0	0	1	0	0	0	0	0	0	0	0	0
青海省人民政府关于进一步加强药品安全监管工作的意见	二、主要任务 (一)强化药品监管制度体系建设。 4.健全药品安全监管体系。推动县级以上人民政府、监管部门依法履行职责,落实企业质量安全主体责任。坚持最严谨的标准,持续完善中藏药炮制规范、制剂注册和制剂室规范化建设等标准体系,不断推动中藏医药高质量发展。坚持预防为主、风险管理和全程控制的监管理念,加强风险防控体系建设,强化药品安全监管风险管控和隐患排查,实施全过程、全链条监管,织密药品质量安全网。坚持改革创新检查执法模式,加强药监法治体系建设,完善行政监督、行业自律、社会监督相结合的药品安全监管模式。(省卫生健康委、省市场监管局、省药品监管局,各市州政府按职责分工负责)	0	0	0	0	0	0	1	0	0	0	0	0	0	0
国务院办公厅关于印发深化医药卫生体制改革2014年重点工作任务的通知	五、规范药品流通秩序 (二十四)改革完善药品价格形成机制。 健全药品价格信息监测制度,推动建立药品零售价格、采购价格、医保支付标准信息共享机制,加强药品价格信息采集、分析和披露,引导形成药品合理价格。改进药品定价方法。完善进口药品、高值医用耗材的价格管理。 (发展改革委、人力资源社会保障部、卫生计生委负责)	0	0	0	0	0	0	0	0	0	0	0	1	0	0
陕西省人民政府办公厅关于印发陕西省医药监督管理局职能配置内设机构和人员编制规定的通知	一、职能调整 (一)省卫生厅移交给省药品监督管理局的药政、药检职能 3.审核、审批新药、进口药品;负责药品的再评价。不良反应监测职能。	0	0	0	0	1	0	0	0	0	0	0	0	0	0
山西省人民政府贯彻《国务院关于建立城镇职工基本医疗保险制度的决定》的实施意见	三、缴费办法 基本医疗保险费由用人单位和职工共同缴纳。用人单位缴费率控制在职工工资总额的6%左右,具体比例,各统筹地区要实际测算,合理确定。实际测算在6%以内的,按实测数确定;确需超过6%的,要从严控制,须报经省城镇职工医疗保险制度改革领导组批准。职工缴费率一般为本人工资收入的2%。随着经济发展,用人单位和职工缴费率可作相应调整。个体经济组织业主及其从业人员,缴费基数为统筹地区的职工平均工资。 所有用人单位和职工必须按时足额缴纳基本医疗保险费。用人单位缴费,党政机关和财政供给的社会团体、事业单位由财政部门统一拨付;其它事业单位和企业由开户银行按月代为扣缴。职工个人缴费,由用人单位从本人工资中按月代为扣缴。其他从业人员的基本医疗保险费,由统筹地区制定缴费办法。	0	0	0	0	0	0	1	0	0	0	0	0	0	0
河南省人民政府办公厅关于健全重特大疾病医疗保险和救助制度的实施意见	三、强化三重制度综合保障 (二)促进三重制度互补衔接。发挥基本医疗保险主体保障功能,各统筹地区参保人员享受同等的居民基本医保待遇;增强大病保险减负功能,在全面落实普惠待遇政策基础上,对特困人员、低保对象、返贫致贫人口实行大病保险起付线降低50%、支付比例提高5个百分点、取消年度最高支付限额等倾斜保障政策;夯实医疗救助托底保障功能,按照“先保险后救助"的原则,对基本医疗保险、大病保险支付后个人医疗费用负担仍然较重的救助对象按规定实施救助,合力防范因病致贫返贫风险。自;00年1月1日起,将困难群众大病补充医疗保险(以下简称大病补充保险)制度并入医疗救助制度;自;00年5月1日起,同步实施居民基本医保、大病保险、医疗救助待遇调整。	0	0	0	0	0	0	1	0	0	0	0	0	0	0
辽宁省人民政府关于印发辽宁省土壤污染防治工作方案的通知	三、重点任务 (五)强化未污染土壤保护,严控新增土壤污染。 6.防范建设用地新增污染。排放重点污染物的建设项目,在开展环境影响评价时,要增加对土壤环境影响的评价内容,并提出防范土壤污染的具体措施。需要建设的土壤污染防治设施,要与主体工程同时设计、同时施工、同时投产使用。环保部门要做好有关措施落实情况的监督管理工作。自;00年起,有关地方政府要与重点行业企业签订土壤污染防治责任书,明确相关措施和责任,并向社会公开。(省环保厅负责)	0	0	0	0	1	0	0	0	0	0	0	0	0	0
安徽省人民政府办公厅关于印发安徽省药品和医疗器械安全突发事件应急预案的通知	2.组织体系00省应急指挥部 特别重大、重大药品安全突发事件发生后,省人民政府成立重大药品安全突发事件应急指挥部(以下简称省应急指挥部),由省人民政府分管副省长任总指挥,省人民政府分管副秘书长、省食品药品监管局局长任副总指挥。省卫生厅、省委宣传部、省监察厅、省教育厅、省公安厅、省财政厅、省交通运输厅、省广电局、省政府新闻办、省网宣办、省信访局、省政府应急办为基本成员单位。根据事件处置工作需要,可增加相关部门和事发地人民政府为成员单位。 省应急指挥部职责:领导、组织、协调特别重大(Ⅰ级)、重大(Ⅱ级)药品安全突发事件的应急处置工作,决定启动安徽省药品和医疗器械安全突发事件应急预案,发布事件处置的重要信息,指导做好善后处置各项工作。 00省应急指挥部成员单位职责 省食品药品监管局:负责药品安全突发事件的应急值守、信息报告、综合协调等应急管理工作。负责控制事件涉及的相关药品,组织开展药品检验;…	0	0	0	0	1	0	0	0	0	0	0	0	0	0
福建省卫生和计划生育委员会、福建省深化医药卫生体制改革领导小组办公室关于印发福建省进一步改善医疗服务行动实施方案的通知	一、行动目标 自2015-;00年,用;00年时间,全面实施进一步改善医疗服务行动计划,坚持以病人为中心,以解决群众看病就医中的突出问题为切入点,创新思路、方法和举措,改善医疗服务环境,优化医疗服务流程,提升医疗服务质量,保障医疗服务安全,加强医患沟通协调,努力实现群众便捷就医、安全就医、有效就医、明白就医,医疗服务水平明显提升,群众看病就医感受明显改善,社会满意度明显提高,医患关系更加和谐。	0	0	0	0	0	1	0	0	0	0	0	0	0	0
河南省人民政府办公厅关于进一步加强药品安全监管工作的通知	四、加强基础设施建设,提升监管能力 (十四)运用现代科技手段,加强药品安全信息管理和综合利用,构建地区和部门间信息沟通平台,建立和完善覆盖全省的药品安全监管信息系统,实现监管信息互联互通和监管资源综合利用,创新监管手段,提高监管效能,使药品安全问题早发现、早整治、早解决。	1	0	0	0	0	0	0	0	0	0	0	0	0	0
上海市人民政府办公厅关于改革完善医疗卫生行业综合监管制度的实施意见	二、明确监管主体和责任,形成多元共治格局 (五)发挥社会监督作用。推进普法教育,增强公众健康权益意识。建立医疗卫生机构及其从业人员依法执业教育制度。畅通投诉举报渠道,整合优化医疗卫生行业投诉举报平台,健全投诉举报奖励制度。坚决曝光违法典型案件,震慑违法行为。发挥检验检测、审计、鉴定、评估等专业机构的监督作用,在监管执法中更多参考专业意见。	0	0	0	0	1	0	1	0	0	0	0	0	0	0
云南省人民政府办公厅关于印发全省发展中医药大会重点任务分解方案的通知	七、着力加快中医药产业发展 (二十八)促进产业集聚和区域联动发展依托昆明国家生物产业基地及曲靖、玉溪、楚雄、红河等产业园区,打造滇中现代中药(民族药)集聚区,强化西双版纳傣药、楚雄彝药、迪庆藏药等特色民族药产业布局。大力推进现代中药与民族药、新型疫苗和生物技术药产业集聚区建设,努力把昆明国家生物产业基地建设成为我国面向南亚东南亚生物经济国际合作的主要基地和具有竞争力的产业基地。(牵头单位:省发展改革委,各州、市人民政府;配合单位:省工业和信息化委、科技厅、财政厅、卫生计生委、农业厅、林业厅、商务厅、食品药品监管局)	0	0	0	0	0	0	0	0	1	0	0	1	0	0
国务院关于江苏省镇江市、江西省九江市职工医疗保障制度改革试点方案的批复	第五章 第二十六条 加强对医疗单位的有效制约,改善医疗服务,合理用药,合理检查,降低医疗费用。	0	0	0	0	0	0	1	0	0	0	0	0	0	0
河南省人民政府办公厅关于贯彻落实国办发〔2013〕80号文件精神做好深化医药卫生体制改革工作的实施意见	二、工作任务 (三)积极推进公立医院改革。 5.全面总结评估40个县级公立医院综合改革试点工作经验,研究解决改革中出现的新问题。县级公立医院改革重点要在建立长效补偿机制、建立健全法人治理结构、推进医药价格改革、深化人事分配制度改革、控制医药费用以及提高人员经费支出占业务支出的比例、提高医务人员待遇等方面开展探索。(省卫生厅、编办、发展改革委、财政厅、人力资源社会保障厅、中医管理局负责)	0	0	0	0	1	0	0	0	0	0	0	0	0	0
河北省人民政府办公厅关于印发河北省“十四五”医疗卫生服务体系规划的通知	围绕生命全周期和健康全过程,以“一老一少”为重点,加快完善妇幼健康、老年健康、职业健康、心理健康与精神卫生、血液供应保障服务体系,补齐健康教育、康复医疗、老年长期照护和安宁疗护等领域短板,建立完善3岁以下婴幼儿照护服务政策标准体系和服务供给体系,全面提高全方位全生命周期健康服务能力。	0	0	0	0	1	0	0	0	0	0	0	0	0	0
海南省人民政府办公厅关于印发《海南省土壤污染防治行动计划实施情况评估和考核办法(试行)》的通知	第五条评估和考核采用评分法,土壤污染防治目标完成情况和土壤污染防治重点工作完成情况满分均为100分,评估和考核结果分为优秀、良好、合格、不合格四个等级。评分90分(含)以上为优秀、80分(含)至90分为良好、60分(含)至80分为合格、60分以下为不合格(即未通过评估或考核)。 ;00年至;00年,每年年初对各市县政府上年度“省土十条”实施情况进行年度评估,评估土壤污染防治重点工作完成情况。 ;00年进行终期考核,考核土壤污染防治目标完成情况。按土壤污染防治目标完成情况划分等级,以;00年度土壤污染防治重点工作完成情况评估结果进行校核。校核评分高于80分(含)的,土壤污染防治目标完成情况评分等级即为考核结果;校核评分低于80分的,土壤污染防治目标完成情况评分等级降1级作为考核结果。 出现1次年度评估结果为不合格的,终期考核结果不得评为优秀;出现2次年度评估结果为不合格的,终期考核结果不得…	0	0	0	0	0	0	1	0	0	0	0	0	0	0
广东省人民政府办公厅转发省卫生厅关于我省新型农村合作医疗制度建设情况报告的通知	二、存在问题 (一)对新型农村合作医疗制度的认识有待提高。部分地区领导对建立新型农村合作医疗制度的意义认识不足,没有真正摆上重要议事日程,措施不落实,资金不到位,严重影响农村合作医疗的发展。部分地方干部存在畏难情绪,工作不够积极主动。部分群众对农村合作医疗互助共济的意义缺乏认识,怕吃亏,怀疑合作医疗能否坚持,担心资金被挪用。	0	0	0	0	0	1	0	0	0	0	0	0	0	0
宁夏回族自治区人民政府办公厅转发自治区卫生计生委等部门关于加快推进医疗卫生与养老服务相结合实施意见的通知	五、保障措施 (五)强化信息支撑。充分运用大数据、云计算、“互联网+”、物联网等信息技术,依托自治区政府云平台,在我区“卫生云”和“社保云”建设的基础上,汇集全区已退休和离休人员基本信息档案、电子健康档案、电子病历、养老保险、医疗保险等信息,以及各级医疗保险经办机构、定点医院和药店的相关信息,推动社区养老服务信息平台与区域人口健康信息平台对接,积极开展养老服务和社区服务信息惠民试点,实现医养结合信息平台数据标准化和信息共享。 以社会保障卡作为医养结合金融信息服务的有机载体,探索推进养老保险金、高龄津贴、特困老年人生活补贴等社会保障性资金领取“一卡通”,实现老年人就医、购药、医疗项目记录、医疗处方记录、实时医疗费用联网结算、金融机构联网在线金融服务等功能,推动“医养结合”信息化、社会化服务。	1	0	0	0	0	0	0	0	0	0	1	0	0	0
云南省人民政府办公厅关于印发云南省深化医药卫生体制改革2014年重点工作任务的通知	二、重点任务 (一)加快推动公立医院改革 4.建立科学补偿机制。破除以药补医,公立医院取消药品加成减少的合理收入通过调整医疗技术服务价格和增加政府投入,以及医院加强成本控制管理、节约运行成本等多方共担,由省财政、卫生部门牵头制定具体的补偿办法。落实政府对县级公立医院符合规划和卫生资源配置要求的投入政策,重点在每个县、市、区办好1-2所县级公立医院。落实对中医医院的投入倾斜政策。充分发挥医疗保险补偿作用,医保基金通过购买服务对医院提供的基本医疗服务予以及时补偿。(责任部门:省财政厅,省卫生行政管理部门;配合部门:省人力资源社会保障厅、物价局)	0	0	0	0	1	0	0	0	0	1	0	0	1	0
内蒙古自治区人民政府办公厅关于印发自治区2016年度大气污染防治实施计划的通知	三、保障措施 (四)严格考核奖惩 8.;00年12月524乌海市乌达区内蒙古广源物流公司采暖1422淘汰00.00.51	0	0	0	0	0	0	0	0	0	0	0	0	0	1
云南省人民政府办公厅关于促进医药产业健康发展的实施意见	二、主要任务 (三)支持发展化学药 重视化学原料药及制剂新产品、新技术引进,加强制剂技术,以及新辅料的研究、引进和推广,提高化学原料药及制剂仿制的起点和水平,加快化学原料药及制剂产品更新的步伐。支持具有自主知识产权的三七素、治疗脑卒中药物苯甲酸钾(dl-PHPB)、抗艾滋病注射用DT-835等新药品种研发以及莫吉司坦、扎托布洛芬、盐酸纳美芬等仿制药品研发,鼓励对蒿甲醚、天麻素、磷酸萘酚喹、铂类抗肿瘤药等化学药大品种实施二次开发。(责任单位:省科技厅、卫生计生委、发展改革委、工业和信息化委、食品药品监管局)	1	0	0	0	0	0	0	0	0	0	0	0	0	0
天津市人民政府关于进一步完善医疗保险制度的意见	八、加强医保监管 (二十九)探索建立医保诚信管理制度。按照加强社会诚信建设的要求,构建医保诚信管理系统,对医保相关方实行诚信管理。逐步建立医疗服务机构、医药企业、医护人员、参保人员的诚信管理名录,与市场主体信用信息公示系统、银行征信系统对接,形成诚信激励失信惩戒的联动管理机制。	0	0	0	0	0	0	1	0	0	0	0	0	0	0
吉林省人民政府办公厅印发关于改革完善全科医生培养与使用激励机制实施方案的通知	四、具体措施 (四)全面支持全科医生职业发展。 8.支持全科诊所发展。政府通过购买服务的方式,引导提供基本医疗卫生服务的非营利性全科诊所参与当地基本医疗卫生服务提供以及承接政府下达的相关任务,在人才培养等方面执行与政府办基层医疗卫生机构同等补助政策;对符合医保条件的,按规定纳入医保定点范围;对具备教学条件的,可认定为全科医生基层实践基地,承担全科医生培养任务;对服务质量稳定、群众满意度高的,有条件的地方可通过扩大服务购买范围、全科医生表彰奖励、一定财政补助等方式给予支持。推进政府监管、行业自律与社会监督并行,促进全科诊所规范发展。(牵头部门:省卫生计生委,配合单位:省教育厅、省财政厅、省人力资源社会保障厅、省中医药管理局)	0	0	1	0	0	0	1	0	0	1	0	0	1	0
广东省人民政府办公厅关于大力发展商业健康保险的实施意见	四、提升健康保险管理和服务水平 (一)夯实商业保险基础建设。商业保险机构要完善健康保险单独核算、精算、风险管理、核保、理赔和数据管理等制度。加强健康保险管理和专业技术人才队伍建设,强化从业人员职业教育,不断提升专业能力。完善经办基本医疗保险和承办城乡居民大病保险的组织架构,健全规章制度,加强人员配备,提高专业经营和服务水平。要精心做好参保群众就诊信息和医药费用审核、报销、结算、支付等工作,发挥统一法人和机构网络优势,开展异地转诊、即时结算服务,简化理赔手续,确保参保群众及时、方便享受医疗保障待遇。加强行业服务评价体系建设,规范健康保险服务标准,建立健全商业保险机构诚信记录制度,加强信用体系建设。(广东保监局负责)	0	0	1	0	1	0	0	0	0	0	0	0	0	0
江西省人民政府关于2009年上半年全省主要污染物总量减排工作进展情况的通报	一、减排进展情况今年以来,全省新增城市污水处理厂7座,新增日处理能力25万吨,现役燃煤发电机组新上脱硫设施5台套,总装机容量135万千瓦时,淘汰了一批高耗能、高污染的落后产能。经环境保护部核查核算,上半年全省化学需氧量排放量与上年同期相比下降00%,完成全年动态减排任务的52%;二氧化硫排放量与上年同期相比下降00%,完成全年动态减排任务的00%。两项指标均超过了省政府年初确定的比上年同期下降2%的目标。11个设区市中,除新余市化学需氧量排放量和宜春市、抚州市、南昌市二氧化硫排放量已经控制在“十一五"目标以内,只需消化新增量外,鹰潭市、上饶市、萍乡市和景德镇市化学需氧量减排任务完成进度超过了50%;九江市、上饶市、鹰潭市二氧化硫减排任务完成进度超过了50%,实现了减排任务完成进度赶上时间进度。但九江市、抚州市、宜春市、吉安市、赣州市化学需氧量减排任务未赶上时间进度(各设区市上半年减排进展…	0	0	0	1	0	0	0	0	0	0	0	0	0	0
山西省人民政府办公厅关于印发山西省推行环境污染第三方治理实施方案的通知	二、重点任务 (二)推进企业污染第三方治理。 4.探索实施限期企业污染第三方治理。选择电力、钢铁、建材、化工等重污染行业或工业园区,对因污染物超过排放标准或总量控制要求,被环境保护主管部门责令限制生产、停产整治且拒不自行治理污染的企业,列出企业清单向社会公布。完善环境污染治理修复行政代执行操作规程。督促不达标排放企业限期内委托环境服务公司进行污染治理。	0	0	0	0	0	0	1	0	0	0	0	1	0	0
河南省人民政府关于印发河南省2009年医药卫生体制改革实施方案的通知	二、推动建立国家基本药物制度 (八)以省为单位,对国家基本药物实行规范的公开招标采购,降低采购价格。建立向各级医疗卫生机构直接配送基本药物的机制,通过规范的竞争,确定配送企业,减少中间环节,降低配送成本。责任单位:省卫生厅、发展改革委、监察厅。	0	0	0	0	0	0	0	0	0	1	0	1	0	0
陕西省人民政府办公厅关于印发陕西省深化医药卫生体制改革2011年度主要工作安排的通知	二、;00年医改主要工作任务 (五)扩大药品“三统一”实施范围,完善药品招标采购机制。 3.基本药物配送企业面向全国进行公开遴选确定。鼓励发展现代物流等多种手段,提高配送效率。推动药品生产流通企业优化结构,实现规模经营。(省卫生厅、省食品药品监管局负责)	0	0	0	0	0	0	0	0	0	0	0	1	0	0
山东省人民政府办公厅关于改革完善全科医生培养与使用激励机制的通知	三、切实强化保障措施 (二)强化督导评估。省卫生计生委要会同有关部门加强政策培训,强化督导检查和第三方评估,及时总结推广好的经验做法。各地要建立健全目标责任督导考核机制,对全科医生培养与使用激励等政策措施落实情况实施定期调研督导和评估考核,及时研究解决实施中出现的问题和困难。	0	0	0	0	1	0	0	0	0	0	0	1	0	0
河南省人民政府关于印发河南省全民健身实施计划(2011—2015年)的通知	二、目标任务 (四)全民健身活动内容更加丰富。大力开展田径、游泳、乒乓球、羽毛球、足球、篮球、排球、网球等竞技性强、普及面广的体育运动项目,广泛组织传统武术、健身气功、太极拳(剑)、健身操(舞)、骑车、登山、跳绳、踢毽、门球等群众喜闻乐见、简便易行的健身活动。	0	0	0	0	0	1	0	0	0	0	0	0	0	0
山西省人民政府关于推进健康中国·山西行动的实施意见	二、主要任务 (十三)慢性呼吸系统疾病防治行动。引导重点人群早期发现疾病,控制危险因素,预防疾病发生发展。推动将肺功能检查纳入40岁以上人群常规体检内容,推行高危人群首诊测量肺功能。加强慢阻肺患者健康管理,为高危人群和患者提供全程防治管理服务。加强基层医疗卫生机构人员培训和设备配置,提高基层慢性呼吸系统疾病防治能力。到;00年和;00年,70岁以下人群慢性呼吸系统疾病死亡率下降到9/10万及以下和00/10万及以下。	0	0	1	1	1	1	0	0	0	0	0	0	0	0
海南省人民政府办公厅关于印发海南省医疗健康产业发展“十三五”规划的通知	四、重点发展领域与任务 (一)博鳌乐城国际医疗旅游先行区。 6.依托进入先行区的医疗机构,瞄准国际医疗健康前沿技术,紧密结合临床,积极建设若干国家级重点专科和实验室或研究性医疗中心,开展前沿的医学科研和先进技术的引进、吸收及转化,一方面在医疗服务中推动科研,另一方面以先进的科研成果支撑医疗服务,取得经济效益和技术效益的最佳结合。	1	0	0	1	0	0	0	0	0	0	1	0	0	0
内蒙古自治区人民政府办公厅关于印发水污染防治工作方案的通知	二、重点任务 (四)切实推动经济结构转型升级 1.调整产业结构 依法淘汰落后产能。自;00年起,各地要依据部分工业行业淘汰落后生产工艺装备和产品指导目录、产业结构调整指导目录及相关行业污染物排放标准,结合水质改善要求及产业发展情况,制定并实施分年度的落后产能淘汰方案,分别报上一级经信、环保部门备案。未完成淘汰任务的地区,暂停审批和核准其相关行业新建项目。(自治区经济和信息化委牵头,发展改革委、环保厅等参与) 严格环境准入。根据流域水质目标和主体功能区规划要求,明确区域环境准入条件,细化功能分区,实施差别化环境准入政策。建立水资源、水环境承载能力监测评价体系,实行承载能力监测预警,已超过承载能力的地区要实施水污染物削减方案,加快调整发展规划和产业结构。对未完成上年度水污染物总量减排目标的地区或企业暂停新增主要污染物排放建设项目的总量审批。到;00年,组织完成盟市、旗县(市、区)域水资源、水…	0	0	0	0	1	0	0	0	1	0	0	0	0	0
新疆维吾尔自治区人民政府办公厅关于印发自治区深化医药卫生体制五项重点改革2010年度主要工作安排的通知	二、工作任务 (一)加快推进基本医疗保障制度建设。 3.提高基本医保基金管理水平。主要工作目标: (3)积极做好农民工等流动就业人员基本医疗保险关系跨制度、跨地区转移接续工作,开展以异地安置退休人员为重点的就地就医、就地结算服务。(人力资源和社会保障厅、卫生厅负责)	0	0	0	0	1	0	0	0	0	0	0	0	0	0
辽宁省人民政府办公厅关于印发《政府办基层医疗卫生机构基本药物集中采购实施办法(试行)》的通知	第五章组织领导和监督管理 第二十二条坚持阳光采购,加强社会监督。由监察、纠风办等有关部门组成我省基本药物集中采购监督委员会,对基本药物采购过程进行监督。	0	0	0	0	0	0	1	0	0	0	0	0	0	0
海南省人民政府办公厅关于印发《海南省“十二五”主要污染物总量减排考核办法》、《海南省“十二五”主要污染物总量减排统计办法》和《海南省“十二五”主要污染物总量减排监测办法》等3个办法的通知	第四条各市县政府、洋浦经济开发区管委会和省直有关部门应当根据省政府下达的主要污染物总量减排任务要求和控制目标,结合本行政区域或本部门实际情况,制定主要污染物总量减排工作方案及年度计划,分解下达减排任务,并于当年3月底前将年度减排计划报送省主要污染物总量减排领导小组办公室。	0	0	0	0	0	0	1	0	0	0	0	0	0	0
江苏省政府办公厅关于印发江苏省“十三五”食品药品安全规划的通知	五、保障措施 (三)落实经费保障,提高资金使用效益。 各级政府要依法依规建立和完善食品药品安全经费投入机制,将食品药品安全工作经费列入政府预算,为食品药品安全工作提供保障。严肃财经纪律,规范资金使用行为,切实提高资金使用效益。	0	0	0	0	1	0	0	0	0	0	0	0	0	0
内蒙古自治区人民政府办公厅关于印发自治区2016年度大气污染防治实施计划的通知	三、保障措施 (四)严格考核奖惩 30.;00年6月562阿拉善盟阿拉善经济开发区阿拉善盟华钢太稀土金属有限责任 公司1采暖00.71拆除00.976	0	0	0	0	0	0	0	0	0	0	0	0	0	1
重庆市人民政府关于印发重庆市畜禽养殖区域划分管理规定和重庆市畜禽养殖区域划分及养殖污染控制实施方案的通知	四、任务及要求 (三)强化畜禽养殖区域管理 1.畜禽禁养区综合整治 畜禽禁养区内已有的畜禽养殖场,由区县(自治县)人民政府责令限期取缔或搬迁,并恢复土地原使用功能。因教学、科研、旅游以及其他特殊需要,在完善畜禽养殖污染防治工程措施,且保证不扩大畜禽养殖存栏规模的情况下,可经县级以上人民政府批准保留。实施了管网化沼液生态还田措施的畜禽养殖场,可以推迟至;00年底前取缔或搬迁。各年度重点整治区域如下: ;00年,集中式饮用水源保护区;群众投诉热点区域。 ;00年,主城九区的街道;建制镇以上城市建成区。 ;00年,执行Ⅰ类、Ⅱ类水质标准的河流、水库。 ;00年,自然保护区核心区和缓冲区,风景名胜区,森林公园重要景点和核心景区。	0	0	0	0	0	0	1	0	0	0	0	0	0	0
河北省人民政府办公厅关于印发河北省中医药健康服务发展规划(2015—2020年)的通知	二、重点任务 (二)加快发展中医养生保健服务。 3.开展中医特色健康管理服务。以“治未病”理念为指导,将中医药优势与健康管理结合,探索融健康文化、健康管理和健康保险为一体的中医健康保障模式。鼓励保险公司参与中医健康管理服务,开发中医药养生保健、“治未病”保险以及各类医疗保险、疾病保险、护理保险和失能收入损失保险等商业健康保险产品,通过中医健康风险评估和风险干预等方式,提供与商业健康保险产品相结合的疾病预防、健康维护和慢性病管理等中医特色健康管理服务。指导健康体检机构规范开展中医特色健康管理业务。积极利用各种平台传播中医药养生保健知识,引导人民群众科学认识中医药,培养健康生活方式和高尚精神追求。专栏2中医养生保健服务建设项目“治未病”服务体系建设实施区域“治未病”服务推进工程,强化省、市、县三级中医医院“治未病”中心(科)建设,指导、带动基层医疗机构提供规范的中医药预防保健服务。“治未病”…	0	0	0	0	1	0	0	1	0	0	1	0	0	0
内蒙古自治区人民政府办公厅关于印发自治区深化医药卫生体制改革2016年重点工作任务的通知	五、建立健全综合监管体系 (一)健全医药卫生监管机制。进一步健全医药卫生综合监管工作制度,加强事中事后监管。加强卫生全行业监管,将区域内所有医疗机构纳入所在地卫生计生行政主管部门的统一规划、统一监管。建立医疗卫生机构医疗费用等信息公开机制。(自治区卫生计生委、法制办、食品药品监管局、发展改革委负责)	0	0	0	0	1	0	0	0	0	0	0	0	0	0
福建省人民政府关于印发水污染防治行动计划工作方案的通知	三、主要任务 (九)严格环境执法监管 3.提升监管水平 提高海洋环境监管能力。健全海上联合执法和巡航监视制度,推进陆源入海排污口、涉海项目、江河入海口的环境监管,加强海洋倾废和海域采砂的执法监察。(省海洋渔业厅牵头,省环保厅、福建海事局参与) 完善水环境监测网络。根据国家统一规划,健全全省水环境监测网络。完善全省水资源环境统一监测管理平台,实现环保、水利、国土、住建、海洋等部门水质、水量监测数据共享。加强公共财力保障,加快落实福建省环境监管能力建设三年行动方案,提升饮用水水源水质全指标监测、水生生物监测、地下水环境监测、化学物质监测、海洋环境监测及环境风险防控技术支撑能力。(省环保厅、海洋渔业厅牵头,省发改委、国土厅、住建厅、交通运输厅、水利厅、农业厅、福建海事局等参与) 提高环境监管能力。加强环境监测、环境监察、环境应急等专业技术培训,严格落实执法、监测等人员持证上岗制度,加强基层环保…	1	0	0	0	0	0	1	0	0	0	0	0	0	0
福建省人民政府关于建立全科医生制度的实施意见	二、逐步规范全科医生培养制度 (四)规范全科医生培养模式。将全科医生培养逐步规范为“5+3”模式,即先接受;00年的临床医学(含中医学、中西医结合,下同)专业本科教育,再接受;00年的全科医生规范化培养。;00年的全科医生规范化培养实行“毕业后规范化培训”方式,培训对象主要从具有本科及以上学历的临床医学专业毕业生中招收,培训期间由经认定的培养基地在省卫生厅指导下进行管理。	0	0	1	0	0	0	0	0	0	0	0	0	0	0
广东省人民政府关于印发“十二五”期间深化医药卫生体制改革实施方案的通知	三、巩固完善基本药物制度和基层医疗卫生机构运行新机制,继续加强基层服务网络建设 (六)推进全科医生制度建设。 4.把建立全科医生制度作为强基层的关键举措,通过规范化培养、转岗培训、执业医师招聘和设置特岗等方式加强全科医生队伍建设,到;00年,为基层医疗卫生机构培养全科医生00万名以上(含中医全科医生),使每万名城市居民拥有2名以上全科医生,每个乡镇卫生院都有全科医生。(由省卫生厅、财政厅、发展改革委、人力资源社会保障厅、教育厅、中医药局负责)	0	0	1	0	0	1	0	0	0	0	0	0	0	0
国务院关于建立全科医生制度的指导意见	一、充分认识建立全科医生制度的重要性和必要性 (一)建立全科医生制度是保障和改善城乡居民健康的迫切需要。 我国是一个有13亿多人口的发展中国家,随着经济发展和人民生活水平的提高,城乡居民对提高健康水平的要求越来越高;同时,工业化、城镇化和生态环境变化带来的影响健康因素越来越多,人口老龄化和疾病谱变化也对医疗卫生服务提出新要求。全科医生是综合程度较高的医学人才,主要在基层承担预防保健、常见病多发病诊疗和转诊、病人康复和慢性病管理、健康管理等一体化服务,被称为居民健康的“守门人”。建立全科医生制度,发挥好全科医生的作用,有利于充分落实预防为主方针,使医疗卫生更好地服务人民健康。	0	0	0	0	0	1	0	0	0	0	0	0	0	0
重庆市人民政府办公厅关于贯彻落实国家中医药健康服务发展规划(2015—2020年)的实施意见	二、重点任务 (二)着力发展社会办中医医疗服务。支持社会资本举办三级中医综合医院,鼓励社会资本举办肛肠、骨伤、妇科、儿科等非营利性中医专科医院,鼓励社会资本举办中医特色康复医院、老年病医院、护理院、临终关怀医院等医疗机构。鼓励有资质的中医专业技术人员特别是名老中医开办中医诊所,允许药品经营企业举办中医坐堂医诊所。鼓励社会资本举办传统中医门诊部和中医诊所。	0	0	0	0	0	0	0	0	0	0	0	1	0	0
广东省人民政府办公厅关于印发广东省医疗卫生领域省级与市县财政事权和支出责任划分改革实施方案的通知	二、保障措施 (三)强化责任落实。各地级以上市、县(市、区)政府要切实落实本级财政医疗卫生投入责任。要在充分考虑当地经济社会发展水平和财政承受能力的基础上,合理确定医疗卫生领域各类财政事权的地区标准,完善动态调整机制,确保财政可持续。对于确因财力薄弱无法承担支出责任的市县政府,省级通过规范的一般性转移支付予以托底保障。	0	1	0	0	0	0	0	0	0	0	0	0	0	0
内蒙古自治区人民政府关于水污染防治行动计划的实施意见	三、重点任务 (七)充分发挥市场机制作用。 引导社会资本、增加政府资金投入,促进多元融资。认真贯彻落实财政部、环境保护部联合印发的《关于推进水污染防治领域政府和社会资本合作的实施意见》(财建﹝2015﹞90号),针对水污染防治领域项目特点,遴选一批饮用水水源地环境综合整治、河流环境生态修复与综合整治、污染场地修复、城市黑臭水体治理、畜禽养殖污染防治、农业面源污染治理等重点项目实施PPP模式,实现组合开发,吸引社会资本投入水环境保护。积极推动设立融资担保基金,推进环保设备融资租赁业务发展。推广股权、项目收益权、特许经营权、排污权等质押融资担保,鼓励社会资本加大水环境保护投入。各地区和各有关部门要重点支持污水处理、污泥处理处置、河道整治、饮用水水源保护、畜禽养殖污染防治、水生态修复、应急清污等项目和工作。对环境监管能力建设及运行费用分级予以必要保障。	0	1	0	0	0	0	0	1	0	0	0	1	0	0
陕西省人民政府办公厅关于印发陕西省深化医药卫生体制改革2011年度主要工作安排的通知	二、;00年医改主要工作任务 (二)提升基本医疗保障水平,减轻群众医疗负担。 3.提高补助标准。各级财政对城镇居民医保和新农合补助标准提高到每人每年200元。(省财政厅、省卫生厅、省人力资源和社会保障厅负责)	0	0	0	0	0	0	0	0	0	0	0	0	1	0
海南省人民政府办公厅关于印发海南省污染水体治理三年行动方案的通知	二、治理范围 (一)全省城镇区域、重要旅游景区和人口较多乡镇Ⅳ类及以下水质的91个城镇内河(湖)污染水体(见附件1)。	0	0	0	0	0	0	1	0	0	0	0	0	0	0
江苏省政府办公厅关于改革完善全科医生培养与使用激励机制的实施意见	江苏省政府办公厅关于改革完善全科医生培养与使用激励机制的实施意见 (苏政办发〔2018〕52号) 各市、县(市、区)人民政府,省各委办厅局,省各直属单位: 全科医生是综合程度较高的医学人才,主要在基层承担预防保健、常见病多发病诊疗和转诊、患者康复和慢性病管理、健康管理等一体化服务,被称为居民健康“守门人”。加快培养大批合格的全科医生,发挥好全科医生作用,对于完善基层医疗卫生服务体系、推进家庭医生签约服务、建立分级诊疗制度、维护和增进人民群众健康,具有重要意义。为贯彻落实《国务院办公厅关于改革完善全科医生培养与使用激励机制的意见》(国办发〔2018〕3号),进一步完善全科医生制度,深入推进健康江苏建设,经省人民政府同意,现提出如下实施意见:	0	0	0	0	0	0	0	0	0	0	0	0	0	1
江西省人民政府办公厅转发省卫生计生委等部门关于推进医疗卫生与养老服务融合发展的实施意见	一、总体目标 到;00年,建成一批兼具医疗卫生和养老服务资质的医疗卫生机构或养老机构(以下统称医养结合机构)。基层卫生巡诊服务覆盖80%的街道、乡镇,并将基层养老机构纳入巡诊范围;全科医生、乡村医生签约服务覆盖70%的街道、乡镇,为居家老年人提供预防、保健、医疗、康复等综合卫生服务。80%以上的医疗卫生机构开设为老年人提供挂号、就医等便利服务的绿色通道。全省老年病床数力争达到2万张左右,各设区市至少有1所二级以上老年病医院或护理院,并实行单独的考核政策。50%以上的养老机构能够以不同形式为入住老年人提供医疗卫生服务。 到;00年,符合省情的医养结合体制机制和政策法规体系基本建立。基层医疗卫生机构对养老机构开展巡诊服务实现全覆盖;全科医生、乡村医生对所有的街道、乡镇老年人签约服务实现全覆盖;医疗卫生机构为老年人提供挂号、就医等便利服务的绿色通道实现全覆盖;养老机构以不同形式为入住老年人提供…	0	0	0	0	0	1	0	0	0	0	0	0	0	0
北京市人民政府关于授予程毓馥、刘桂芹、张明菖、陈余卿四同志为“白求恩式医生”光荣称号的决定	北京市人民政府关于授予程毓馥、刘桂芹、张明菖、陈余卿四同志为“白求恩式医生”光荣称号的决定 京政发[198231号 七一一医院五官科主任程毓馥,北京积水潭妇产科主任刘桂芹、燕山石油化学总公司职工医院内科副主任张明菖、北京医学院第三附属医院内科主治医师陈余卿四同志,在被派到上沃尔特执行援外医疗任务期间,不幸于一九八一年十二月十九日下午遇车祸牺牲,四位同志上沃尔特工作期间,认真贯彻执行党的外交路线,努力履行国际主义义务,全心全意为上沃尔特人民服务,他们不怕苦,不怕累、对技术精益求精,对病人满腔热忱,克服困难,创造条件,千方百计为当地人民接解除病痛,他们的这种忘我精神和精湛医术,不仅受到上沃尔特政府和人民的高度赞扬,而且被附近国家的人民广为传颂,给我们伟大的祖国争了光。为了表彰他们的爱国主义和国际主义精神,市人民政府决定授予程毓馥、刘桂芹、张明菖、陈余卿四位同志“白求恩式医生”的光荣称号。市人…	0	0	0	0	0	0	0	0	0	0	0	0	0	1
贵州省人民政府办公厅关于印发贵州省“十二五”民族医药和特色食品及旅游商品特色产业发展规划的通知	三、发展总体思路、发展原则和目标 (三)发展目标。 2.特色食品和旅游商品 ;00年,实现工业总产值500亿元,年均增长20%以上,投资100亿元,特色食品产业新增就业8万人。到;00年,全省旅游商品产业规模迅速扩大,旅游商品质量和档次明显提高,整体竞争力和可持续发展能力大幅增强,把旅游商品产业培育成为我省的特色优势产业,为工业强省战略提供支撑,走出一条“小商品、大市场”、“小企业、大集群”、“小老板、大产业”、“小创业、大就业”、“小专业、大品牌”、“小配套、大规模”、“小特长、大人才”、“小带动、大富民”的路子。全省旅游购物收入达550亿元,年均增速25%,占全省旅游总收入的比重达到25%。旅游商品新增就业20万人,共解决和带动就业200万人。	0	0	0	0	0	1	0	0	0	0	0	0	0	0
吉林省人民政府办公厅关于加快发展健身休闲产业的实施意见	四、组织实施 (六)强化督查落实。各地区、各有关部门要研究制定推进健身休闲产业发展的实施方案,细化目标任务,推动责任落实。省体育局、省文化和旅游厅等部门要会同有关部门,对全省健身休闲产业的推进落实情况进行监督检查和跟踪分析,重大事项及时向省政府报告。	0	0	0	0	1	0	0	0	0	0	0	0	0	0
内蒙古自治区人民政府办公厅关于印发振兴蒙医药行动计划(2017—2025年)的通知	三、重点任务 (六)蒙医药人才队伍建设行动。 8.蒙药技术创新团队建设工程。培养和引进一批蒙药药材培育、种植(养殖)、产品研发、生产工艺、检验检测、职业化管理等方面的创新实用人才。推进蒙药师承教育,建立蒙药继承创新人才队伍,为蒙药产业发展提供智力保障和人才支持。(自治区人力资源社会保障厅、教育厅、卫生计生委、食品药品监管局、科技厅、发展改革委、财政厅)	0	0	1	0	0	0	0	0	0	0	0	0	0	0
福建省人民政府办公厅关于印发2005年度全省治理“餐桌污染”建设“食品放心工程”工作方案的通知	三、治理水产品污染 (十六)由省海洋与渔业局负责开展省级水产品药残及贝类有毒有害物质检测工作,增加藻类有毒有害物残留检测,继续开展织纹螺安全食用预警预报和织纹螺毒素研究工作。	0	0	0	0	1	0	0	0	0	0	0	0	0	0
辽宁省人民政府办公厅关于印发《政府办基层医疗卫生机构基本药物集中采购实施办法(试行)》的通知	第一章总则 第一条为建立规范的基本药物省级集中采购机制,切实保障群众安全用药,进一步减轻医药费用负担,根据《国务院办公厅关于印发建立和规范政府办基层医疗卫生机构基本药物采购机制指导意见的通知》(国办发〔2010〕56号)等文件精神,结合我省实际,制定本办法。	0	0	0	0	0	0	1	0	0	0	0	0	0	0
新疆维吾尔自治区人民政府关于进一步加强新型农牧区合作医疗试点工作的通知	八、充分发挥各级协调领导小组的组织协调作用 各部门要各司其职,密切配合,协调一致。卫生行政部门是牵头单位,要积极提出意见和建议,抓好具体工作的落实,对整体工作进行宏观指导。要发挥中医民族医药简、便、效、廉的特色与优势,培养农牧区卫生机构的中医民族医药技术人员;财政部门要负责做好补助资金的预算和安排,并且督促各级财政予以落实。研究制定基金管理制度,加强基金管理,做好监督检查,确保基金安全;农业部门要结合农牧区工作特点,配合做好新型农牧区合作医疗试点工作的宣传、推广和发动工作,协助对筹资的管理,监督基金的使用;民政部门要完善农牧区医疗救助制度,解决好五保户、特困户的就医难问题;发展改革部门要研究新型农牧区合作医疗的发展问题,将建立新型农牧区合作医疗制度纳入国民经济和社会发展规划,在制定“十一五”规划时,提出有关新型农牧区合作医疗的发展目标,要完善农牧区医药价格监管政策;人事编制部门积极推进新…	0	0	0	0	1	0	0	0	0	0	1	0	1	0
江西省人民政府办公厅转发省卫生计生委等部门关于推进医疗卫生与养老服务融合发展的实施意见	二、主要任务 (六)积极发展中医药健康养老服务。大力开发中医药与养老服务相结合的系列服务产品,建设糖尿病医疗康复养生养老中心等3-5个医养结合示范基地。探索建立中医药特色医养结合机构,鼓励有条件的中医院举办养老院,实行院中院模式。鼓励新建以中医药健康养老为主的康复医院、护理院,支持有条件的养老机构设置以老年病、慢性病防治为主的中医诊室。二级以上中医医院开设老年病科,增加老年病床数量,开展老年病、慢性病防治和康复护理,为老年人就医提供优先优惠服务。支持有条件的中医医院开展社区和居家中医药健康养老服务,为老年人建立健康档案,建立医疗契约服务关系,开展上门诊视、健康查体、保健咨询等服务。支持养老机构开展融合中医特色健康管理的老年人养生保健、医疗、康复、护理服务。建立中医医疗机构与养老机构合作机制,县级以上中医院要与1所较大规模的养老机构建立合作关系,探索设立中医医疗机构和养老机构之间的就诊绿色…	0	0	0	1	0	0	0	0	0	0	1	0	0	0
北京市人民政府办公厅转发市人力社保局市、财政局关于北京市市级公费医疗改革办法的通知	第十条单位补充医疗保险按照缴费基数的4%的比例提取费用,;00年提取比例暂定为3%。由同级财政列入部门预算,由用人单位按照规定的缴费比例按月缴纳,市级单位补充医疗保险统筹管理。在缴费比例不超过4%的前提下,需要调整缴纳比例时,由市人力社保部门会同市财政部门确定。	0	0	0	0	0	0	1	0	0	0	0	0	0	0
内蒙古自治区人民政府办公厅关于做好冬季采暖期原煤燃烧污染治理工作的通知	三、加快能源结构调整 大力推广使用天然气等清洁能源,加快管网及配套设施建设,提高城市及周边地区天然气普及率,新增天然气应优先保障居民生活或用于替代燃煤。自治区发展改革委要会同经济和信息化委等部门制定补偿措施,对城中村、城乡结合部实施煤改气进行补贴;对采暖期城区分散采暖居民改用燃气采暖的气价进行补贴,努力减少生活供暖用煤带来的污染。	0	0	0	1	0	0	0	0	0	0	0	0	1	0
内蒙古自治区人民政府办公厅关于印发自治区2016年度大气污染防治实施计划的通知	三、保障措施 (四)严格考核奖惩 9.;00年12月底780呼和浩特市回民区内蒙古昌盛泰房地产开发有限责任公司锅炉房QXW7生活供热103590拆并/改气00.7212	0	0	0	0	0	0	0	0	0	0	0	0	0	1
内蒙古自治区人民政府办公厅关于印发自治区2016年度大气污染防治实施计划的通知	三、保障措施 (四)严格考核奖惩 7.;00年年底385乌兰察布市集宁区第二医院供热2200拆改00.38	0	0	0	0	0	0	0	0	0	0	0	0	0	1
福建省人民政府关于建立全科医生制度的实施意见	四、改革全科医生执业方式 (十六)引导全科医生以多种方式执业。取得执业资格的全科医生一般注册1个执业地点,也可以根据需要多点注册执业。全科医生可以在基层医疗卫生机构(或医院)全职或兼职工作,也可以独立开办个体诊所或与他人联合开办合伙制诊所。鼓励组建由全科医生和社区护士、公共卫生医生或乡村医生等人员组成的全科医生团队,划片为居民提供服务。在县级医疗机构、乡镇卫生院和社区卫生服务机构执业的全科医生,从事基层医疗卫生服务工作,确因工作需要,经县卫生局考核批准,报设区市卫生局备案,可申请同一类别至多三个专业作为执业范围进行注册。要健全基层医疗卫生机构对全科医生的人力资源管理办法,规范私人诊所雇佣人员的劳动关系管理。	0	0	1	0	0	0	0	0	0	0	0	0	0	0
重庆市人民政府办公厅关于推进医疗保障基金监管制度体系改革的实施意见	三、建立健全医保基金监管制度体系 (二)完善协议管理制度。建立健全常态化、全覆盖的医保结算费用审核制度。完善基本医疗保险协议管理,简化优化医药机构定点申请、专业评估、协商谈判程序,强化对定点医药机构协议履行情况的督促检查,突出行为规范、服务质量、费用控制、医保基金风险防控考核评价,完善定点医药机构动态管理和退出机制。(责任单位:市医保局、市卫生健康委)	0	0	0	0	1	0	0	0	0	0	0	0	0	0
海南省人民政府办公厅关于印发海南省医药产业“十三五”发展规划指导意见的通知	二、指导思想、基本原则和发展目标 (二)基本原则。 2.市场主导,政府引导。 以市场需求为导向,充分发挥市场在资源配置中的决定性作用,强化企业市场主体地位,激发企业活力和创造力;转变政府职能,在产业规划、产业政策、质量监管等方面引导和推动产业健康发展。	0	0	0	0	0	0	0	0	0	0	0	1	0	0
山西省人民政府办公厅关于转发省环保厅、省发展改革委山西省环境主要污染物超量减排补偿办法(试行)的通知	第一条为鼓励市、县政府在完成污染物排放总量减排任务、企业在达到排污许可量基础上,继续采取各种措施,持续实施污染减排,加速改善环境质量,根据国家及省有关法律、法规、规章规定,特制订本办法。	0	0	0	0	0	0	1	0	0	0	0	0	0	0
国务院办公厅关于印发控制污染物排放许可制实施方案的通知	一、总体要求(二)基本原则 精简高效,衔接顺畅。 排污许可制衔接环境影响评价管理制度,融合总量控制制度,为排污收费、环境统计、排污权交易等工作提供统一的污染物排放数据,减少重复申报,减轻企事业单位负担,提高管理效能。 公平公正,一企一证。 企事业单位持证排污,按照所在地改善环境质量和保障环境安全的要求承担相应的污染治理责任,多排放多担责、少排放可获益。向企事业单位核发排污许可证,作为生产运营期排污行为的唯一行政许可,并明确其排污行为依法应当遵守的环境管理要求和承担的法律责任义务。 权责清晰,强化监管。 排污许可证是企事业单位在生产运营期接受环境监管和环境保护部门实施监管的主要法律文书。企事业单位依法申领排污许可证,按证排污,自证守法。环境保护部门基于企事业单位守法承诺,依法发放排污许可证,依证强化事中事后监管,对违法排污行为实施严厉打击。 公开透明,社会共治。 排污许可证申领、核发、监管…	0	0	0	0	0	1	0	0	0	0	0	0	0	0
重庆市人民政府关于组建重庆医药高等专科学校的通知	重庆市人民政府关于组建重庆医药高等专科学校的通知 (渝府〔2006〕62号) 市政府各部门,有关单位: 根据《高等教育法》和《普通高等学校设置暂行条例》以及全国高等学校设置评议委员会的评议结果,教育部日前下发《关于同意重庆市药剂学校、重庆市卫生学校、重庆市第二卫生学校合并组建重庆医药高等专科学校的通知》(教发函〔2006〕52号),同意重庆市药剂学校、重庆市卫生学校和重庆市第二卫生学校合并组建重庆医药高等专科学校,同时撤销重庆市药剂学校、重庆市卫生学校和重庆市第二卫生学校建制。 重庆医药高等专科学校系专科层次的普通高等学校,由市人民政府领导和管理,以实施高等专科教育为主,全日制在校生规模暂定5000人。 市政府有关部门要加强对重庆医药高等专科学校的管理和指导,帮助其尽快完成升格后的有关工作,积极推进学校改革和发展。市卫生局要加强对重庆医药高等专科学校的管理,加大经费投入,加快基础设施、学…	0	0	0	0	0	0	0	0	0	0	0	0	0	1
陕西省人民政府办公厅关于印发2015年度主要污染物总量减排实施方案的通知	三、减排重点 (三)推进工业企业减排工程建设。落实好;00年纳入国家目标责任书和省委目标责任考核的68个减排项目,确保按期建成投运。按照《关中地区重点行业大气污染物排放限值》(DB61-941-2014),对电力、钢铁、有色、水泥、玻璃等行业企业以及燃煤锅炉实施技术升级改造和污染治理,确保达标排放,降低单位工业增加值排放强度。完成陕西渭河热电厂、大唐灞桥热电厂等关中地区18台763万千瓦燃煤火电机组超低排放改造工程,推进全省其他燃煤火电机组脱硫提标、除尘改造和脱硝工程。加强钢铁、水泥、造纸、石化等重点行业治污设施运行监管,确保达标运行。	0	0	0	1	0	1	0	0	0	0	0	0	0	0
内蒙古自治区人民政府办公厅关于印发2016年度水污染防治计划的通知	三、重点任务 (七)全力保障水生态环境安全。 2.各盟市要全面开展饮用水水源保护区内排污口和违法建筑排查清理工作。单一水源供水的盟市要开展备用水源或应急水源建设工作。缺水地区不达标水源必须配套净水设施,加强农村饮用水水源保护和水质检测,确保供水水质达标。(自治区水利厅、环保厅牵头,自治区发展改革委、财政厅、住房城乡建设厅、卫生计生委等部门参与)	0	0	0	1	1	0	0	0	0	0	0	0	0	0
山东省人民政府办公厅关于贯彻国办发〔2015〕13号文件进一步加强乡村医生队伍建设的实施意见	五、保障乡村医生合理待遇 (二)拓宽乡村医生发展空间。在同等条件下,乡镇卫生院优先聘用具有执业医师、执业助理医师资格的乡村医生,进一步吸引执业医师、执业助理医师和医学院校毕业生到村卫生室工作。进一步推进乡镇卫生院对村卫生室人员、业务、财务、药品和绩效考核等乡村卫生服务一体化管理。市、县(市、区)政府要积极创造条件,逐步推行村卫生室的人、财、物全部纳入乡镇卫生院管理的紧密型一体化管理模式。要以乡村卫生服务一体化管理为抓手,结合医疗联合体组建工作,探索建立“县招、乡管、村用”用人制度。各县(市、区)统一组织招用乡村医生,建立乡村医生人才库,并在各县(市、区)卫生计生部门备案。乡镇医疗卫生机构对招用人员统一管理,统一安排到村卫生室执业。各市要选择1-2个县(市、区)的部分乡镇在;00年开展试点。	0	0	1	0	0	0	0	0	0	0	1	0	0	0
安徽省人民政府办公厅关于加快推进社会力量举办医疗机构的实施意见	四、促进社会办医健康发展 1.积极营造社会办医良好氛围。社会办医疗机构医疗纠纷调解纳入全社会医患纠纷调处机制范围,创建平安医院。充分利用广播、电视、报纸、网络等媒体,深入解读国家和省有关的政策措施,大力宣传社会办医疗机构在医疗卫生服务体系中的重要地位和作用,形成有利于社会办医疗机构发展的良好氛围。 安徽省人民政府办公厅 ;00年10月24日	0	0	0	0	1	0	0	0	0	0	0	0	0	0
内蒙古自治区人民政府办公厅关于印发自治区2016年度大气污染防治实施计划的通知	三、保障措施 (四)严格考核奖惩 40.;00年12月510鄂尔多斯市鄂托克旗内蒙古中谷矿业有限公司----供暖2200淘汰00.	0	0	0	0	0	0	0	0	0	0	0	0	0	1
海南省人民政府办公厅关于印发海南省区域统筹区城镇居民基本医疗保险实施办法的通知	第五章医疗服务管理 第十九条定点医疗机构的医务人员应当因病施治,坚持合理检查、合理治疗、合理转诊的原则,严格按照规定的医疗诊治技术规范诊治,为参保人提供良好的医疗服务。	0	0	0	0	0	0	1	0	0	0	0	0	0	0
国务院办公厅关于印发深化医药卫生体制改革2019年重点工作任务的通知	一、研究制定的文件 1.制定加强医生队伍管理的办法。 (国家卫生健康委负责,;00年11月底前完成)	0	0	0	0	0	1	0	0	0	0	0	0	0	0
广东省人民政府关于印发“十二五”期间深化医药卫生体制改革实施方案的通知	三、巩固完善基本药物制度和基层医疗卫生机构运行新机制,继续加强基层服务网络建设 (七)促进人才向基层流动。 6.进一步完善相关政策措施,鼓励引导医务人员到基层服务;建立上级医院与基层医疗卫生机构之间的人才合作交流机制,探索县域人才柔性流动方式,促进县乡人才联动;开展免费医学生定向培养,实施全科医生特岗计划,充实基层人才队伍;严格落实二级以上医院和疾病预防控制机构医生晋升中高级职称前到农村服务累计一年以上的政策;鼓励大医院退休医生到基层和农村执业;对到艰苦边远地区基层医疗卫生机构服务的医务人员,落实津补贴政策或给予必要补助。(由省卫生厅、发展改革委、财政厅、人力资源社会保障厅、教育厅、中医药局负责)	0	0	1	0	0	0	0	0	0	0	0	0	1	0
陕西省人民政府办公厅关于印发加快医学教育创新发展实施方案的通知	二、主要任务 (八)促进中医药教育传承创新发展。集中优势资源做大做强中医学、针灸推拿学、中药学等中医药主干专业,布局中医养生学、中医康复学等服务生命全周期的中医药专业。将中医疾病防治和中医药经典相关课程融入中医基础与临床课程,强化学生中医思维培养。在省级优秀教材奖评选中倾斜支持符合中医药教育规律的教材。探索多学科交叉创新型中医药人才培养,做好名老中医学术经验继承和老药工传统技艺传承工作,将师承教育贯穿临床实践教学全过程。实施中西医联合创新行动,围绕中医优势病种,挖掘经典名方、医院制剂、临床验方等,加快推动疗效确切、临床价值高的中药创新药的研发和产业化。	1	0	1	0	0	0	0	0	0	0	0	0	0	0
广东省人民政府办公厅关于印发广东省深化医药卫生体制改革2016年工作要点的通知	十、大力发展健康服务业 (一)加快发展社会办医。落实《广东省人民政府办公厅关于印发广东省促进社会办医加快发展实施方案的通知》(粤府办〔2016〕51号),及时开展落实情况督查,形成公立医疗机构与社会办医疗机构优势互补、良性竞争、分工协作、健康发展的新格局。(省卫生计生委、发展改革委负责,省财政厅、商务厅、中医药局参与)	0	0	0	0	0	0	0	0	0	0	0	1	0	0
海南省人民政府办公厅关于印发《海南省“十二五”主要污染物总量减排考核办法》、《海南省“十二五”主要污染物总量减排统计办法》和《海南省“十二五”主要污染物总量减排监测办法》等3个办法的通知	第十三条各级环境保护行政主管部门应当建立污染源基础信息档案和监测数据库,按季度逐级报送污染源监督性监测数据。	0	0	0	0	0	0	1	0	0	0	0	0	0	0
内蒙古自治区人民政府办公厅关于印发自治区2016年度大气污染防治实施计划的通知	三、保障措施 (四)严格考核奖惩 1.;00年12月503鄂尔多斯市杭锦旗金瑞源小区--CG-361供暖5500淘汰00.00.58	0	0	0	0	0	0	0	0	0	0	0	0	0	1
吉林省人民政府办公厅印发关于改革完善全科医生培养与使用激励机制实施方案的通知	四、具体措施 (二)全力提升全科医生培养质量。 9.严格培训基地动态管理。将全科专业基地建设和作用发挥情况列为培训基地考核评估的核心指标。综合医院住院医师规范化培训基地要从人员配备、基础条件、教学设施等方面全面加强全科专业基地建设,增加全科医疗诊疗科目,独立设置全科医学科,以人才培养为目的开展全科临床、教学和科研工作,联合基层医疗卫生机构培养全科医生。调整助理全科医生培训基地区域布局,以三级综合医院为重点,完善教育教学设施设备和学员住宿条件,提升培训能力和水平。(牵头部门:省卫生计生委、省中医药管理局分别负责,配合单位:省发展改革委、省财政厅、省教育厅)	0	0	1	1	0	0	0	0	0	0	0	0	0	0
河南省人民政府办公厅关于实施河南省淮河、海河、黄河中上游流域水污染防治规划(2006－2010年)的通知	一、《规划》是我省完成国家重点流域水污染防治规划有关工作的依据,是水污染防治工作的基础。各省辖市政府和省政府有关部门要根据《规划》确定的原则、目标和任务,结合本地、本部门实际,制定实施方案,认真抓好落实。	0	0	0	0	1	0	0	0	0	0	0	0	0	0
内蒙古自治区人民政府办公厅关于印发自治区2016年度大气污染防治实施计划的通知	三、保障措施 (四)严格考核奖惩 9.;00年12月底754呼和浩特市回民区呼和浩特市回民区怡康居供暖设施维修服务部邮电器材锅炉房立式炉生活供热2718拆并/改气00.5442	0	0	0	0	0	0	0	0	0	0	0	0	0	1
江西省人民政府办公厅关于印发江西省“十三五”中医药发展规划的通知	三、主要任务 (四)切实推进中医药继承创新。 3.加强中医药理论研究与技术传承。深化中医药基础理论、中医药类优势技术、疗效评价标准的系统研究,建立概念明确、结构合理的中医药基础理论体系。加强旴江医学等民间医药的整理发掘和传承创新,建立中医药传统知识保护数据库、保护名录和保护制度,做大做强中药老字号品牌。开展对中医药民间特色诊疗技术及老药工经验的调查、挖掘整理、研究评价及推广应用,支持中医秘方的知识产权保护和产业化开发。对我省2000多种中药材特别是抗病毒类中药材逐一开展物质基础及质量标准研究,建立起国家认可、国际认同的赣药标准体系。推进科技资源和数据信息开放共享,加强名老中医传承服务平台、中医药传统知识保护研究平台、中药资源动态监测及服务体系、中药种质资源库等特色资源平台建设。	1	0	0	0	0	0	0	0	0	0	0	0	0	0
内蒙古自治区人民政府办公厅关于印发《内蒙古自治区本级职工基本医疗保险管理办法》等五个办法的通知[附：内蒙古自治区本级职工大额医疗保险管理办法、内蒙古自治区本级职工基本医疗保险费用结算办法、内蒙古自治区本级职工基本医疗保险转诊转院和特殊医疗项目检查及治疗管理办法、内蒙古自治区本级职工基本医疗保险个人账户及社会保障卡管理办法]	第四章基本医疗保险基金的支付 第二十三条参保人员住院治疗期间,按医嘱使用乙类药品、基本医疗保险支付部分费用的诊疗项目,在抢救、急救期间按医嘱使用血液制品、蛋白类制品的其费用均先由本人支付10%,其余部分由统筹基金和个人按规定比例支付。	0	0	0	0	0	0	1	0	0	0	0	0	0	0
江西省人民政府办公厅关于印发江西省“十三五”中医药发展规划的通知	三、主要任务 (一)切实提高中医医疗服务能力。 2.全面提升中医医疗服务水平。实施中医临床优势培育工程,高标准建设江西热敏灸医院。加强专科专病防治体系建设。建立中医药参与突发公共卫生事件应急网络和应急救治工作协调机制,提高中医药应急救治和重大传染病防治能力。推动建立融入中医药内容的社区健康管理模式,开展高危人群中医药健康干预。建立中医医院与基层医疗卫生机构、疾病预防控制机构分工合作的慢性病综合防治网络和工作机制,加快形成急慢分治的分级诊疗秩序。提升中医医疗机构管理与服务能力,完善中医医疗质量控制体系和评审评价体系,开展中医特色优势诊疗服务地方标准研制。	0	0	0	0	1	0	0	0	0	0	0	0	0	0
江苏省人民政府关于建立全科医生制度的实施意见	一、建立全科医生制度的总体要求和目标任务 (一)总体要求。以邓小平理论和“三个代表”重要思想为指导,深入贯彻落实科学发展观,按照深化医药卫生体制改革的总体思路,遵循医疗卫生事业发展和全科医生培养规律,坚持政府主导,同时发挥市场机制作用,建立完善全科医生培养、使用、管理和激励制度,全面提高我省城乡基层医疗卫生服务水平。坚持以强化临床实践能力为重点,规范培养模式,统一培养标准,严格考试考核,确保全科医生培养质量;改革全科医生执业方式,建立健全激励机制,引导全科医生到基层执业,逐步增加基层医生队伍中全科医生的比重;统筹当前与长远,既致力于建立统一规范的全科医生制度,又注重多渠道培养全科医生,满足现阶段基层对全科医生的需要,加快形成以全科医生为主体的基层医疗卫生队伍,为城乡居民提供安全、有效、方便、价廉的基本医疗卫生服务,不断提高人民群众健康水平。	0	0	0	0	0	1	0	0	0	0	0	0	0	0
福建省人民政府办公厅关于印发2005年度全省治理“餐桌污染”建设“食品放心工程”工作方案的通知	五、治理加工食品污染 (二十六)由省卫生厅负责开展全省食品卫生许可证专项整治,以规范保健食品、婴幼儿配方食品、面粉、熟肉制品、调味品、食品添加剂和饮料生产企业的食品卫生许可证发放和监督为重点,查处无证和不符合卫生许可条件的企业。积极推行食品卫生监督量化分级管理制度,开展对流通环节和消费环节皮蛋、酱油、月饼、蜜饯等的卫生质量抽检。由省食品药品监管局负责核发并加强保健品生产企业许可证的管理,督促保健食品生产企业实施质量管理规范。	0	0	0	0	0	0	1	0	0	0	0	0	0	0
江西省人民政府办公厅关于印发江西省“十三五”中医药发展规划的通知	三、主要任务 (三)全面提升中药产业发展水平。 6.挖掘中药产业发展潜能。建设中国(南昌)中医药科创城,以中药产业发展为目标,按照“双核驱动、协同发展”的模式,构建技术创新及成果转化体系,推动高端人才集聚,打造国际有影响、国内领先的中国药谷。推动临床疗效确切的院内中药制剂在省内依法调剂使用,并开展相关基础研究与新药开发研究。充分发挥我省中药资源特色优势,开展中药食疗产品、中药香精油、中药化妆品、中药兽药等系列产品的开发及应用推广。	0	0	0	0	0	0	0	0	1	0	0	0	0	0
国务院关于建立全科医生制度的指导意见	八、积极稳妥地推进全科医生制度建设 (三十五)做好舆论宣传引导。 通过健康教育、舆论宣传等方式培养居民的预防保健观念,引导居民转变传统就医观念和习惯,增强全社会的契约意识,为实施改革营造良好环境。 国务院 二○一一年七月一日	0	0	0	0	1	0	0	0	0	0	0	0	0	0
海南省人民政府办公厅关于调整城镇居民基本医疗保险有关政策的通知	三、关于区域统筹区城镇居民基本医疗保险政策调整 (二)居民住院支付比例调整为:一级医院,统筹基金支付70%,个人负担30%;二级医院,统筹基金支付60%,个人负担40%;三级医院,统筹基金支付50%,个人负担50%。	0	0	0	0	0	0	1	0	0	0	0	0	0	0
福建省人民政府办公厅关于印发2005年度全省治理“餐桌污染”建设“食品放心工程”工作方案的通知	五、治理加工食品污染 (三十二)由省卫生厅、食品药品监管局负责,工商局配合,开展保健食品专项整治,严格审批和标准备案的工作,严厉打击未经审批生产销售保健食品行为和非法添加药物成分以及超范围、虚假宣传保健功能行为。	0	0	0	0	0	0	1	0	0	0	0	0	0	0
西藏自治区人民政府办公厅转发民政厅等部门关于进一步完善城乡医疗救助制度全面开展重特大疾病医疗救助工作实施意见的通知	五、申请审核审批程序 (一)申请受理与审核。城乡居民向户籍所在乡(镇)人民政府或街道办事处设立的便民服务大厅(社会救助窗口)提出医疗救助申请,申请人无行为能力无法提交申请的,由村(居)委会或所在单位代为提交。跨省安置困难退休人员向工资关系管理部门提出申请。申请人需如实提供以下相关材料: 1.个人书面申请;	0	0	0	0	1	0	0	0	0	0	0	0	0	0
广东省人民政府办公厅关于大力发展商业健康保险的实施意见	一、总体要求 (二)发展目标。到;00年,基本建立市场体系完备、产品形态丰富、经营诚信规范的现代商业健康保险服务业,实现服务能力明显提升、服务领域更加广泛、投保人数大幅增加,商业健康保险赔付支出占卫生总费用的比重显著提高,成为全省社会医疗保障体系的重要支柱。	0	0	0	0	0	1	0	0	0	0	0	0	0	0
重庆市人民政府关于印发重庆市深化医药卫生体制综合改革试点方案的通知	三、主要任务 (二)建立完善分级诊疗制度。 1.积极推进医疗联合体建设。各区县(自治县)公立医院采取县乡一体化或医疗协作的方式,与本行政区域内乡镇卫生院和社区卫生服务机构建立医疗联合体,;00年各区县(自治县)均要建立医疗联合体。市级公立医院可通过托管或医疗协作的方式与区县(自治县)公立医院组建医疗联合体。鼓励探索多种上下联动形式,按照利益共享、责任共担原则,在医疗联合体内部建立分工协作、双向转诊机制。加强城乡对口帮扶,推进医师多点执业,鼓励城市二级以上医院医师到基层医疗卫生机构多点执业,制定区县(自治县)高级职称医务人员到基层医疗机构坐诊挂号费特殊政策,促进优质资源下沉。(牵头部门:市卫生计生委;配合部门:市人力社保局、市物价局)	0	0	0	0	1	0	0	0	0	0	0	0	0	0
江西省人民政府办公厅印发关于改革完善全科医生培养与使用激励机制实施方案的通知	二、主要任务 (一)建立健全全科医生培养制度。 2.完善毕业后全科医学教育制度。扩大全科专业住院医师规范化培训招收规模,力争到;00年全科专业招收数量达到当年总招收计划的20%,并逐年增加。将全科专业招收任务完成情况纳入住院医师规范化培训基地考核,并与财政补助资金挂钩。各级财政要按规定加大对全科专业住院医师规范化培训和助理全科医生培训的支持。鼓励市县级财政配套专项补助经费。继续开展助理全科医生培训。农村订单定向免费培养的本科医学生毕业后全部纳入全科专业住院医师规范化培训,纳入定向就业协议规定的服务期,明确其培训时间。对于单位委派参加住院医师规范化培训和助理全科医生培训的人员,委派单位应与其签订协议,就培训期间待遇、培训期满后服务年限、违约处理办法等进行约定。	0	0	1	0	0	0	0	0	0	0	0	0	1	0
吉林省人民政府关于加快推进医药健康支柱产业发展的实施意见	二、重点推进工作 (二)做优生物制药产业。坚持创制与仿制并举,保持和增强我省疫苗、胰岛素和生长素等生物药产品在国内的竞争优势,开展重组蛋白、抗体药物等基因工程药物研发与产业化,推进多组分生化药物大品种技术提升,保持和增强生物制药产业竞争优势。到;00年,生物制药产业实现销售产值200亿元。 2.基因工程新药创制。加快单克隆抗体、重组蛋白等基因工程药物的研发与产业化。	1	0	0	0	0	1	0	0	0	0	0	0	0	0
贵州省人民政府办公厅关于印发贵州省“十二五”民族医药和特色食品及旅游商品特色产业发展规划的通知	四、主要任务和发展重点 (二)民族医药。 1.积极引导制药企业重组整合,加快企业规模发展步伐 积极引进国内外大型制药集团和各种资金投资我省制药行业,资产重组、架构重建。重点做大做强益佰、百灵、同济堂、信邦、神奇、威门等制药龙头骨干企业。以大集团带动和促进中小型制药企业向“专、精、特、新”方向发展,形成我省制药行业以大型集团为主导、大中小型企业协调发展的格局。鼓励支持组建贵州苗药集团等2-3家大型制药企业集团,培育年产值超5亿元以上的制药企业15家,其中:10-30亿元的5家,30亿元以上的3家;力争培育年销售额超1亿元以上的单品种药品40个,其中:5亿元以上的11-15个,10亿元以上的3-5个,建成规范化种植示范基地20个。 加快实施贵州益佰工业园建设、黔峰生物科技园、贵阳黔峰生物制品有限责任公司血液制品生产线建设、贵州同济堂制药公司针剂生产线、金康制药有限责任公司年产4亿粒胶囊、20…	0	0	0	1	0	0	0	1	0	0	0	1	0	0
青海省人民政府办公厅关于印发青海省2017年度水污染防治实施方案的通知	青海省人民政府办公厅关于印发青海省;00年度水污染防治实施方案的通知 (青政办[2017105号) 各市、自治州人民政府,省政府各委、办、厅、局: 《青海省;00年度水污染防治实施方案》已经省政府同意,现印发给你们,请认真贯彻执行。 青海省人民政府办公厅 ;00年6月14日 青海省;00年度水污染防治实施方案 为深入贯彻《国务院关于印发水污染防治行动计划的通知》(国发[201517号)和《青海省人民政府关于印发<青海省水污染防治工作方案>的通知》(青政[2015100号),推进我省;00年度水污染防治各项重点工作任务落实,根据《青海省水污染防治目标责任书》和《水污染防治行动计划考核规定(试行)》等要求,结合我省水污染防治工作实际,制定本方案。	0	0	0	0	0	0	0	0	0	0	0	0	0	1
新疆维吾尔自治区人民政府办公厅印发贯彻国务院深化医药卫生体制改革领导小组关于进一步推广深化医药卫生体制改革经验的若干意见的实施方案的通知	九、加强组织领导,增强深化医改的主动性和创造性 (三)切实做好宣传工作。加强对医改典型经验的挖掘和宣传,反映鲜活的医改实践和进展成效,坚定改革信心,凝聚改革共识。坚持正确的舆论导向,及时回应社会关切,合理引导社会预期,为深化医改营造良好舆论环境。	0	0	0	0	1	0	0	0	0	0	0	0	0	0
国务院办公厅关于印发深化医药卫生体制改革2019年重点工作任务的通知	一、研究制定的文件 4.制定改进职工医保个人账户政策文件。 (国家医保局负责,;00年12月底前完成)	0	0	0	0	0	1	0	0	0	0	0	0	0	0
内蒙古自治区人民政府办公厅关于印发自治区2016年度大气污染防治实施计划的通知	三、保障措施 (四)严格考核奖惩 1.;00年6月563阿拉善盟阿拉善经济开发区阿拉善左旗赛建水泥制品有限责任公司1采暖00.64拆除00.252	0	0	0	0	0	0	0	0	0	0	0	0	0	1
山西省人民政府关于印发山西省“十二五”期间深化医药卫生体制改革规划暨实施方案的通知	三、重点任务 (九)加强卫生信息化建设。 充分发挥信息资源的辅助决策和技术支撑作用,促进信息技术与管理、诊疗规范和日常监管有效融合。加快建立全省统一的电子健康档案、电子病历、药品器械、医疗服务、医保信息等数据标准体系,积极推进医疗卫生信息技术标准化建设。加强信息安全标准建设。加强区域信息平台建设,有效整合现有信息资源,推动医疗卫生信息资源共享。“十二五”末,基本建立满足社会需求的公共卫生服务、医疗服务、医疗保障、药品供应保障体系和综合卫生管理信息系统,实现省域内互联互通、信息共享,力争实现与国家级信息平台的互联互通。全面加强县乡医疗机构远程诊疗会诊系统。加快推进基层医疗卫生机构信息化建设,建立涵盖基本药物供应、居民健康管理、基本医疗服务、绩效考核等功能的基层医疗卫生信息系统,提高基层医疗卫生服务水平。到“十二五”末,100%的乡镇卫生院和社区卫生服务机构建立信息系统,100%的行政村卫生…	1	0	0	0	0	0	0	0	0	0	0	0	0	0
河南省人民政府办公厅关于印发河南省2009年度主要污染物总量减排计划实施方案的通知	一、总则 (二)编制依据。 7.《河南省人民政府关于下达;00年全省主要污染物排放总量控制计划的通知》(豫政〔2009〕27号);	0	0	0	0	0	0	0	0	0	0	0	0	0	1
河南省人民政府办公厅关于做好2010年全省污染源普查动态更新调查工作的通知	我省;00年更新调查范围涉及4个领域、2万余家重点调查单位,调查内容包括水污染物12项、大气污染物6项以及工业固体废物等多个类别。更新调查主要内容如下:	0	0	0	0	0	0	0	0	0	0	0	0	0	1
山西省人民政府关于推进健康中国·山西行动的实施意见	二、主要任务 (三)全民健身行动。推进基本公共体育服务体系建设,努力打造百姓身边健身组织和“15分钟健身圈”。为不同人群提供针对性的运动健身方案或运动指导服务。推进公共体育设施免费或低收费开放。推动形成体医结合的疾病管理和健康服务模式。把高校学生体质健康状况纳入对高校的考核评价内容。到;00年和;00年,城乡居民达到《国民体质测定标准》合格以上的人数比例分别大于00%和00%,经常参加体育锻炼人数比例达到37%及以上和40%及以上。	0	0	0	0	1	1	0	0	0	0	0	0	0	0
河北省人民政府关于建立统一的城乡居民基本医疗保险制度的意见	七、信息系统建设 按照“标准统一,资源共享、数据集中、服务延伸”的原则,建立健全全省统一的城乡居民医疗保险信息系统。完善城乡居民医疗保险信息系统数据标准和运行规范,加强医疗监控和基金监管,强化信息安全和患者隐私保护。推行“互联网+”医疗保险便民服务模式,方便城乡居民参保、缴费和就医结算。 各统筹地区做好信息系统维护,实现医疗保险经办机构之间,医疗保险经办机构与定点医疗机构、定点零售药店之间高效运行。各级政府要加大信息系统建设和长期运行维护投入,形成稳定可靠的政府投入机制。	1	0	0	0	0	0	0	0	0	0	0	0	0	0
内蒙古自治区人民政府办公厅关于印发自治区2016年度大气污染防治实施计划的通知	三、保障措施 (四)严格考核奖惩 1.;00年12月683通辽市经济技术开发区厚德种业CLSG-系列供热00.8淘汰00.00.25	0	0	0	0	0	0	0	0	0	0	0	0	0	1
国务院办公厅关于印发第二次全国污染源普查方案的通知	二、普查时点、对象、范围和内容 (二)普查对象与范围。 5.移动源。普查对象为机动车和非道路移动污染源。其中,非道路移动污染源包括飞机、船舶、铁路内燃机车和工程机械、农业机械等非道路移动机械。	0	0	0	0	1	0	0	0	0	0	0	0	0	0
国务院关于建立全科医生制度的指导意见	二、建立全科医生制度的指导思想、基本原则和总体目标 (六)总体目标。 到;00年,在我国初步建立起充满生机和活力的全科医生制度,基本形成统一规范的全科医生培养模式和“首诊在基层”的服务模式,全科医生与城乡居民基本建立比较稳定的服务关系,基本实现城乡每万名居民有2-3名合格的全科医生,全科医生服务水平全面提高,基本适应人民群众基本医疗卫生服务需求。	0	0	0	0	0	1	0	0	0	0	0	0	0	0
国务院办公厅关于印发第二次全国污染源普查方案的通知	普查对象为中华人民共和国境内有污染源的单位和个体经营户。范围包括:工业污染源,农业污染源,生活污染源,集中式污染治理设施,移动源及其他产生、排放污染物的设施。	0	0	0	0	1	0	0	0	0	0	0	0	0	0
广西壮族自治区人民政府办公厅关于印发广西促进“互联网+医疗健康”发展实施方案的通知	一、健全“互联网+医疗健康”服务体系 (一)推进“互联网+”医疗服务。 1.推动医疗机构大力提升医院管理水平,应用互联网等信息技术拓展医疗服务空间和内容,构建覆盖诊前、诊中、诊后的线上线下一体化医疗服务模式。到;00年,全区三级甲等医院全面开展“互联网+”医疗服务。 允许依托医疗机构发展互联网医院。医疗机构可以使用互联网医院作为第二名称,在实体医院基础上,运用互联网技术提供安全适宜的医疗服务,允许注册或者备案的执业医师在线开展部分常见病、慢性病复诊,允许掌握患者病历资料后,在线开具部分常见病、慢性病处方。 支持医疗卫生机构、符合条件的第三方机构搭建互联网信息平台,开展远程医疗、健康咨询、健康管理服务。(责任单位:自治区卫生计生委、发展改革委。排在第一位的部门为牵头部门,下同)	1	0	0	0	0	1	0	0	0	0	0	1	0	0
天津市人民政府关于印发天津市"十二五"期间深化医药卫生体制改革规划暨实施方案的通知	八、建立强有力的实施保障机制 (四)搞好宣传,正确引导。坚持正确的舆论导向,采取通俗易懂、生动形象的方式,广泛宣传、解读改革政策,解答群众关心的问题,及时总结、宣传改革经验,为深化医药卫生体制改革营造良好的社会和舆论环境。	0	0	0	0	1	0	0	0	0	0	0	0	0	0
天津市人民政府关于印发天津市"十二五"期间深化医药卫生体制改革规划暨实施方案的通知	三、进一步健全全民医保体系 (四)提高基本医保管理服务水平。继续巩固和完善基本医疗保险即时结算结报,做好基本医疗保险与城乡医疗救助、优抚对象补助以及基本医疗保险意外伤害附加保险结算衔接。做好职工医保制度内跨省市转移接续,推进跨省市医疗费用异地结算工作。建立具有基金管理、费用结算与控制、医疗行为管理与监督等复合功能的医保信息系统,并与定点医疗机构信息系统对接。 加强基本医保基金收支管理。职工医保基金结余要控制在合理水平,城乡居民医保基金要坚持当年收支平衡的原则。增强基本医保基金抗风险能力,完善基本医保基金管理监督和风险防范机制,控制医疗费用过快增长,防止基本医保基金透支,保障基金安全。	0	0	0	0	1	0	0	0	0	0	0	0	0	0
河北省人民政府办公厅关于印发河北省“十四五”医疗卫生服务体系规划的通知	一、发展基础 (一)发展现状。“十三五”时期,我省从强基层、补短板、优布局着手,着力构建覆盖城乡所有居民的医疗卫生服务体系,有力维护了全省人民生命安全和身体健康,为现代化经济强省、美丽河北建设提供了重要保障。 4.群众健康水平持续改善。覆盖全体城乡居民的基本公共卫生服务内容不断丰富,从12项拓展到31项,人均补助从40元提高到74元。全省00万因病致贫返贫人口成功摆脱贫困,实现贫困人口“有地方看病、有人看病、有制度保障看病”目标。人均预期寿命提高到00岁,孕产妇死亡率、婴儿死亡率、5岁以下儿童死亡率分别降低到00/10万、00‰、00‰,主要健康指标均达到预期目标。 我省医疗卫生服务体系建设虽然取得了一定进展,但与经济社会高质量发展要求和人民群众日益增长的高品质、多样化健康需求相比,还存在弱项。医疗卫生资源结构与布局不尽合理。每百万人口三级医院数低于全国平均水平,每千人口医疗卫生机构床位…	0	0	0	0	0	1	0	0	0	0	0	0	0	0
内蒙古自治区人民政府办公厅关于印发自治区2016年度大气污染防治实施计划的通知	三、保障措施 (四)严格考核奖惩 5.;00年12月底695呼和浩特市新城区内蒙古商品交易中心有限责任公司物业管理中心锅炉房生活供热41436拆并/改气00.08841	0	0	0	0	0	0	0	0	0	0	0	0	0	1
海南省人民政府办公厅关于印发海南省医疗健康产业发展“十三五”规划的通知	五、保障措施 (七)加大招商引资,引入优质医疗资源。加大招商工作力度,利用博鳌亚洲论坛、京交会、夏洽会等活动以及日常招商工作,积极宣传推介我省医疗健康产业投资方向与政策,吸引民间资本、海内外基金、国内国际资本等以合资、合作等多种方式投资我省医疗健康产业。鼓励民间资本与国外先进医疗机构合作,引入优质医疗资源。加强点对点招商工作,积极上门引资,主动服务,吸引优质企业投资我省医疗健康产业。支持和鼓励保险资金在我省博鳌乐城国际医疗旅游先行区等区域兴办医疗、体检、疗养等机构。	0	0	0	0	1	0	0	1	0	0	0	1	0	0
新疆维吾尔自治区人民政府办公厅贯彻落实国务院办公厅关于进一步加强乡村医生队伍建设实施意见的意见	七、进一步完善乡村医生补偿政策 (一)提高乡村医生补助标准。 2.基本公共卫生服务补助。对乡村医生提供的基本公共卫生服务,通过购买服务的方式给予补助。原则上将50%左右的基本公共卫生服务任务交由村卫生室承担,绩效考核后拨付相应资金。未来新增的基本公共卫生服务补助资金继续重点向乡村医生倾斜,用于加强村级基本公共卫生服务工作。	0	0	0	0	0	0	0	0	0	1	0	0	1	0
吉林省人民政府办公厅关于印发吉林省深化医药卫生体制改革2012年主要工作安排的通知	二、工作任务 (五)着力推进公共卫生六大体系建设。 6.巩固基本药物保障体系建设。建立省级基本药物集中采购使用管理信息系统,落实集中付款和供应配送政策,提高及时配送率,完善结算和监管系统,实现网络化常态运行。(省卫生厅、财政厅负责)	1	0	0	0	0	0	0	0	0	0	0	0	0	0
安徽省人民政府办公厅关于印发安徽省医疗卫生领域财政事权和支出责任划分改革实施方案的通知	二、主要内容 (三)计划生育方面。 3.计划生育家庭补助。对省级或市以下所属职能部门、国有企事业单位依法落实独生子女保健费政策,根据其隶属关系、单位性质及财政供给政策给予保障或补助,分别划分为省级财政事权或市以下财政事权,由同级财政承担支出责任,同级财政根据单位性质、财政供给政策给予保障或补助。现阶段,省级财政根据补助需求、财力状况等因素统筹安排预算资金,按照人口规模及结构、人均可用财力、人均卫生投入、目标考核等因素和一定的系数权重分配转移支付资金,市县财政据实安排补助资金。	0	0	0	0	0	0	0	0	0	0	0	0	1	0
青海省人民政府办公厅转发省经贸委等部门关于分离省属国有企业自办医疗机构实施意见的通知	四、经费来源 (三)破产企业和特困企业移交的自办医疗机构,其支出大于收入的,前三年由省财政比照当地国有医疗机构正常开支水平,确定定额标准,给予差额补助,三年后逐步实行自收自支,自负盈亏。	0	0	0	0	0	0	0	0	0	0	0	0	1	0
吉林省人民政府办公厅关于加快发展健身休闲产业的实施意见	结合国家健身休闲重点运动项目发展规划和目录,支持具有消费引领性、运动体验性的健身休闲项目发展,因地制宜,充分利用各地自然资源优势,科学规划,差异化发展,以长春为中心,辐射长白山区域和松花江、鸭绿江、图们江流域以及松辽平原、西部草原的冰雪体育、山地运动、户外健身、民族体育四大体育产业集群;以冰雪产业为特色,构建健身休闲产业“陆、水、空”三维空间项目体系布局。	0	0	0	0	0	0	0	0	1	0	0	0	0	0
福建省人民政府办公厅关于印发2005年度全省治理“餐桌污染”建设“食品放心工程”工作方案的通知	八、其他有关分工 (五十七)由省食品药品监管局负责组织起草制定《关于开展食品安全信用体系建设指导意见》。厦门市人民政府负责抓好国家和省在厦门市的食品安全信用体系建设试点工作,福州市重点抓好建立流通领域食品安全企业信用档案试点工作,并在制度和机制上有所创新。	0	0	0	0	1	0	0	0	0	0	0	0	0	0
海南省人民政府办公厅关于印发《海南省“十二五”主要污染物总量减排考核办法》、《海南省“十二五”主要污染物总量减排统计办法》和《海南省“十二五”主要污染物总量减排监测办法》等3个办法的通知	第九条统计过程中,对各类污染物排放量的测(估)算方法及相关系数的选取方法依照国家《“十二五”主要污染物总量减排统计办法》的有关规定执行。	0	0	0	0	0	0	1	0	0	0	0	0	0	0
内蒙古自治区人民政府办公厅关于印发自治区2016年度大气污染防治实施计划的通知	三、保障措施 (四)严格考核奖惩 2.;00年年底306乌兰察布市丰镇市丰镇市房屋管理局锅蒙UL0303SZD00-00/95/70-AⅢ居民供暖2300取缔00.57	0	0	0	0	0	0	0	0	0	0	0	0	0	1
吉林省人民政府办公厅关于印发《吉林省省直机关事业单位保健对象医疗保险管理办法(试行)》的通知	第五条原享受公费医疗待遇的省直单位保健对象的医疗补贴资金由省财政列入当年财政预算,按核定的标准拨付;原未享受公费医疗待遇的省直自收自支事业单位的保健对象由所在单位按核定的医疗补贴标准缴纳补贴资金。	0	0	0	0	0	0	0	0	0	0	0	0	1	0
云南省人民政府办公厅关于印发推进医疗保障基金监管制度体系改革重点任务清单的通知	三、强化监管方式创新,增强基金监管能力探索建立第三方力量参与医保基金监管机制。加强医保信息系统建设,建立全省统一的大数据实时动态智能监管平台。大力推行医保电子凭证,积极推进“互联网+监管"。健全医保信用评价指标体系,着力构建以信用为基础的新型监管机制,提升监管的专业性、精准性和规范性。	1	0	0	0	0	0	0	0	0	0	0	1	0	0
福建省人民政府办公厅关于印发2005年度全省治理“餐桌污染”建设“食品放心工程”工作方案的通知	八、其他有关分工 (四十六)由省发展改革委、农业厅负责,加快农产品检验检测体系建设,;00年底前基本建成以省部级农业质量监督检验中心为龙头,以区域性农业质检中心为补充,以市县级农业质检中心为骨干,以生产基地、农贸市场、龙头企业检测室(站、点)为基础的,省、市、县、农产品主产区(基地)、市场多层次的农业质量检测网络。	0	0	0	0	1	1	0	0	0	0	1	0	0	0
贵州省人民政府关于批转贵州省主要污染物总量减排统计监测及考核办法的通知	十、不符合国家产业政策的企业或生产线关闭情况 指标定义:《责任书》中规定的不符合国家产业政策的水污染严重企业和生产能力、工艺、设备与产品淘汰关停完成情况。 数据来源:经贸部门。	0	0	0	0	0	0	1	0	0	0	0	0	0	0
四川省人民政府办公厅关于印发支持社会力量提供多层次多样化医疗服务实施方案的通知	五、严格行业监管和行业自律 (二十一)加强全行业监管。推进医疗卫生行业综合监管制度建设,转变监管理念,创新监管手段,提升监管效能,强化医疗卫生全行业监管。加强监管体系建设,强化卫生计生监督机构特别是基层机构的监管能力,推进全省卫生计生监督执法人员职位分级管理试点工作。在加强日常管理的基础上,全面推行“双随机”抽查方式。依托省、市、县三级全民健康信息平台,联通各级医疗机构,逐步实现对医疗机构、医务人员、医疗行为的全面监管。充分发挥社会组织对社会办医疗机构的监管作用,建立与公立医疗机构同等的约谈整改制度。严厉打击非法行医、医疗欺诈、出租出借《医疗机构执业许可证》、出租承包科室、虚假违法医疗广告宣传等行为,加强医疗养生类节目监管。加强对社会办非营利性医疗机构产权归属、财务运营、资金结余使用等方面的监督管理,非营利性医疗机构不得将收支结余用于分红或变相分红。加强对营利性医疗机构盈利率的管控。对医…	0	0	0	0	0	0	1	0	0	0	1	0	0	0
贵州省人民政府办公厅关于印发贵州省“十二五”民族医药和特色食品及旅游商品特色产业发展规划的通知	三、发展总体思路、发展原则和目标 (二)发展原则。 坚持政府引导、企业主导、市场运作的原则。充分发挥政府在促进产业发展中的引导和协调作用,积极创造良好政策环境,着力培育优强企业。建立健全市场营销服务体系,突出发挥企业主导作用,加强公共服务平台建设。实施“大企业、大品牌”战略,引导企业重组整合,走集团化、集约化道路,提高产业集中度。 坚持技术进步原则。加快技术进步步伐,坚持技术引进与自主创新相结合,不断提高技术装备水平,以及新产品、新技术的开发应用水平,使重点骨干企业整体技术和装备水平达到国内先进水平。鼓励和支持企业加大知识产权的开发和保护力度,在做大做强现有名优品牌的过程中,重点培育全国性品牌,带动区域性品牌发展,逐步实现由品牌向名牌的转变,进一步扩大国内外市场的影响力和占有率。	1	0	0	0	1	1	0	0	0	0	0	1	0	0
天津市人民政府办公厅关于学生儿童参加天津市城乡居民基本医疗保险有关问题的通知	四、参保学生、儿童因治疗需要转外地就医的,参照原市劳动保障局和市卫生局印发的《天津市城镇职工基本医疗保险转诊转院管理办法》(津劳局〔2001〕316号)执行。	0	0	0	0	0	0	1	0	0	0	0	0	0	0
新疆维吾尔自治区人民政府办公厅关于印发自治区深化医药卫生体制五项重点改革2010年度主要工作安排的通知	二、工作任务 (一)加快推进基本医疗保障制度建设。 1.巩固扩大基本医疗保障覆盖面。主要工作目标: (3)巩固新型农村合作医疗(以下简称新农合)覆盖面,参合率稳定在97%以上。(卫生厅负责)	0	0	0	0	0	1	0	0	0	0	0	0	0	0
江苏省残疾预防和残疾人康复实施办法	第二章残疾预防 第十一条县级以上地方人民政府组织有关部门、残疾人联合会等开展下列残疾预防工作: (四)加强筛查、统计等工作,建立残疾人口数据信息报告制度。	0	0	0	0	1	0	0	0	0	0	0	0	0	0
广东省人民政府办公厅关于大力发展商业健康保险的实施意见	二、发展多样化的商业健康保险服务 (三)提高医疗执业保险覆盖面。加快发展医疗责任保险、医疗意外保险,探索发展多种形式的医疗执业保险,健全医疗风险分担机制,完善医疗纠纷人民调解工作机制。支持医疗机构和医师个人购买医疗执业保险,医师个人购买的医疗执业保险适用于任一执业地点。鼓励通过商业保险等方式提高医务人员的医疗、养老保障水平以及解决医疗职业伤害保障和损害赔偿问题。(省卫生计生委、省司法厅、广东保监局负责)	0	0	0	0	0	0	0	1	0	0	0	0	0	0
江西省人民政府办公厅关于印发江西省“十三五”中医药发展规划的通知	三、主要任务 (四)切实推进中医药继承创新。 4.提升江西中医药大学办学水平。落实《江西省人民政府与国家中医药管理局共建江西中医药大学协议》,提升江西中医药大学科研实力。加强中医药国际交流与合作,大力推广热敏灸技术,推进岐黄国医外国政要江中体验中心建设。深化教育教学改革,支持将中医学、中药学列入江西省一流学科建设规划,力争建成国家一流学科。	1	0	0	1	0	0	0	0	0	0	0	1	0	0
国务院关于建立全科医生制度的指导意见	三、逐步建立统一规范的全科医生培养制度 (七)规范全科医生培养模式。 将全科医生培养逐步规范为“5+3”模式,即先接受;00年的临床医学(含中医学)本科教育,再接受;00年的全科医生规范化培养。在过渡期内,;00年的全科医生规范化培养可以实行“毕业后规范化培训”和“临床医学研究生教育”两种方式,具体方式由各省(区、市)确定。 参加毕业后规范化培训的人员主要从具有本科及以上学历的临床医学专业毕业生中招收,培训期间由全科医生规范化培养基地在卫生部门(含中医药管理部门)和教育部门共同指导下进行管理。全科方向的临床医学专业学位研究生按照统一的全科医生规范化培养要求进行培养,培养结束考核合格者可获得全科医生规范化培养合格证书;临床医学专业学位研究生教育以教育部门为主管理。	0	0	1	0	0	1	0	0	0	0	0	0	0	0
国务院关于印发“十二五”期间深化医药卫生体制改革规划暨实施方案的通知	六、统筹推进相关领域改革 (一)提高基本公共卫生服务均等化水平。 逐步提高人均基本公共卫生服务经费标准,;00年达到40元以上,免费为城乡居民提供健康档案、健康教育、预防接种、传染病防治、儿童保健、孕产妇保健、老年人保健、高血压等慢性病管理、重性精神疾病管理、卫生监督协管等国家基本公共卫生服务项目。加强健康促进与教育,实施国民健康行动计划,将健康教育纳入国民教育体系。主要媒体要加强健康知识宣传。倡导健康的生活方式,引导科学就医和安全合理用药。到;00年,城乡居民健康档案规范化电子建档率达到75%以上;高血压、糖尿病患者规范化管理率达到40%以上。 逐步增加国家重大公共卫生项目,继续开展国家免疫规划,艾滋病和结核病、血吸虫病等重大传染病防治,农村孕产妇住院分娩补助、适龄妇女“两癌”(宫颈癌、乳腺癌)检查等重大公共卫生服务专项,农村孕产妇住院分娩率稳定在96%以上。重点做好食品安全(包括餐饮…	0	0	0	0	1	1	0	0	0	0	0	0	0	0
吉林省人民政府办公厅印发关于改革完善全科医生培养与使用激励机制实施方案的通知	四、具体措施 (一)加快补充全科医生队伍数量。 5.完善全科医生使用管理。对经住院医师规范化培训合格后到农村基层执业的全科医生,可实行县管乡用(县级医疗卫生机构聘用管理、乡镇卫生院使用);对经助理全科医生培训合格后到村卫生室工作的助理全科医生,可实行乡管村用(乡镇卫生院聘用管理、村卫生室使用)。县管乡用、乡管村用的全科医生、助理全科医生可实行轮换派遣制度,轮换时间由派出单位和派驻单位根据工作任务需要协商确定。派遣全科医生实行双重管理,期满考核由派出医疗机构和派驻基层单位共同负责。(牵头部门:省卫生计生委、省中医药管理局分别负责,配合单位:省人力资源社会保障厅)	0	0	1	0	0	0	0	0	0	0	0	0	0	0
甘肃省人民政府办公厅关于2012年上半年省政府环保目标责任书落实情况及污染减排工作进展情况的通报	三、存在的主要问题 (三)个别建设项目“三同时”执行不到位和未批先建问题依然存在。要求6月30日前验收并正常运行的榆中钢铁有限公司焦炉煤气脱硫工程和临泽圣洁纸品厂废水治理工程,仍未通过环保验收,不能发挥减排作用。华亭中煦煤化工有限责任公司60万吨/年煤制甲醇项目,在试生产期间,企业环境管理意识淡薄,生产废水监测不达标,环保设施运行台账不完善,危险废物管理不严格。庄浪金龙矿业公司未经环评审批擅自改扩建,未建环保设施,违法生产,给当地环境造成较大影响。	0	0	0	0	0	0	1	0	0	0	0	0	0	0
内蒙古自治区人民政府办公厅关于印发《内蒙古自治区本级职工基本医疗保险管理办法》等五个办法的通知[附：内蒙古自治区本级职工大额医疗保险管理办法、内蒙古自治区本级职工基本医疗保险费用结算办法、内蒙古自治区本级职工基本医疗保险转诊转院和特殊医疗项目检查及治疗管理办法、内蒙古自治区本级职工基本医疗保险个人账户及社会保障卡管理办法]	第七章附则 第十三条参保人员中断基本医疗保险关系6个月以内接续关系的,按00%的费率一次性补交中断期间的基本医疗保险费及滞纳金后,可继续享受基本医疗保险待遇,但不划个人账户,缴费年限可连续计算;超过6个月以上接续医疗保险关系的,按00%的费率一次性补交中断期间的医疗保险费及滞纳金,并设立一年准入期,缴费年限可连续计算,但不划个人账户,中断期间的医疗费用不予报销。	0	0	0	0	0	0	1	0	0	0	0	0	0	0
青海省人民政府关于印发青海省城镇居民基本医疗保险试点工作指导意见的通知	四、试点的基本内容 (二)基金筹集 1.筹资标准。年人均筹资标准为160元。个人缴费和各级政府补助资金按照以下标准执行: (1)18岁以下居民和全日制大中专院校在校学生每年每人缴纳80元,各级政府补助80元。其中省财政补助56元,州(地、市)、县(区、市)财政各补助12元,大中专院校在校生按隶属关系,分别由各级财政承担。 (2)19-59岁男性居民和19-54岁的女性居民每年每人缴纳110元,各级政府补助50元。其中省财政补助35元,州(地、市)、县(区、市)财政各补助00元。 (3)60岁以上男性居民和55岁以上女性居民每年每人缴纳60元,各级政府补助100元。其中省财政补助70元,州(地、市)、县(区、市)财政各补助15元。	0	0	0	0	0	0	0	0	0	0	0	0	1	0
广东省人民政府办公厅关于加快推进深化医药卫生体制改革政策落实的通知	五、加快完善紧密型医联体人财物管理机制。;00年6月底前,医疗集团和医疗共同体要制订内部的人财物管理办法。紧密型医联体内医务人员由牵头医院统筹使用,人员流动不受编制性质限制。紧密型医联体对基层医疗卫生机构财务实行统一领导、独立核算,资产实行统一管理,药品耗材实行集中采购、统一配送,允许牵头医院的院内制剂在紧密型医联体范围内流通使用。各地要加强对紧密型医联体的考核评价。	0	0	0	0	1	0	0	0	0	0	0	0	0	0
陕西省主要污染物总量减排监测办法	第七条省级环境保护主管部门负责组织对污染源监督性监测的统一质量控制和考核,并组织不定期抽查工作。 县级环境保护主管部门负责对污染源自动监测系统的监测设备进行实验室比对监测和自动监测数据有效性审核。县级环境保护主管部门不具备实验室比对监测和监测数据有效性审核能力的由市级以上环境保护部门承担。市级环境保护主管部门负责对国控和省控污染源自动监测系统的监测设备进行实验室比对监测和自动监测数据有效性审核,其中省级环境保护主管部门负责对装机容量30万千瓦以上火电厂和市级城市污水处理厂污染源自动监测系统的监测设备进行实验室比对监测和自动监测数据有效性审核。实验室比对监测与自动监测设备同步现场采样,监测频次为每季度一次。 实验室比对的监测结果与同步的自动监测的数据质量达不到规定时,则从本次实验室比对监测时间上推至上次实验室比对监测之间的时段按自动监测系统数据缺失处理,数据缺失时段的排放量按照相关技术规范…	0	0	0	0	0	0	1	0	0	0	0	0	0	0
国务院办公厅关于印发第二次全国污染源普查方案的通知	四、普查组织及实施 (五)宣传动员。 各级污染源普查领导小组办公室要按照国发〔2016〕59号文件要求,充分利用报刊、广播、电视、网络等各种媒体,广泛动员社会力量参与污染源普查,为普查实施创造良好氛围。	0	0	0	0	1	0	0	0	0	0	0	0	0	0
陕西省人民政府办公厅关于印发2013年度主要污染物总量减排实施方案的通知	四、工作机制与考核监督 5.;00年规模化养殖场和养殖小区治理化学需氧量、氨氮减排项目表(略)	0	0	0	0	0	1	0	0	0	0	0	0	0	0
内蒙古自治区人民政府关于水污染防治行动计划的实施意见	三、重点任务 (五)严格环境执法监管。 严厉打击环境违法行为。重点打击私设暗管或利用渗井、渗坑、溶洞排放、倾倒含有毒有害污染物废水、含病原体污水,监测数据弄虚作假,不正常使用水污染物处理设施,或者未经批准拆除、闲置水污染物处理设施等环境违法行为。对造成生态损害的责任者严格落实赔偿制度。严肃查处建设项目环境影响评价领域越权审批、未批先建、边批边建、久试不验等违法违规行为。对构成犯罪的,要依法追究刑事责任。完善自治区级巡查、盟市检查的环境监督执法机制,强化环保、公安、监察等部门和单位协作,健全行政执法与刑事司法衔接配合机制,完善案件移送、受理、立案、通报等规定。加强对各地区和各有关部门环保工作的监督。 完善水环境监测网络,提高环境监管能力。统一规划设置监测断面(点位)。提升饮用水水源水质全指标监测、水生生物监测、地下水环境监测、化学物质监测及环境风险防控技术支撑能力。加强环境监测、环境监察、…	0	0	0	0	0	0	1	0	0	0	0	0	0	0
吉林省人民政府办公厅转发省劳动保障厅等部门关于城镇居民基本医疗保险试点实施意见的通知	二、参保范围、缴费和补助、待遇保障 (五)待遇保障。城镇居民基本医疗保险重点保障参保居民的住院和门诊大病医疗;基本医疗保险统筹基金按照“以收定支、收支平衡、略有结余”的原则确定支付标准。 3.统筹基金支付比例。参保居民住院期间发生的符合规定的医疗费用,在起付标准以上,最高支付限额以下可采取费用分段、按不同医疗机构确定具体支付标准的方式进行支付。费用分段不得超过3段。统筹基金支付比例为30%-70%,平均支付比例不低于50%,门诊大病的统筹基金支付比例不低于50%。学生儿童发生的住院和门诊大病(包括意外伤害)医疗费用,统筹基金支付比例为50%-90%,平均支付比例不低于70%。	0	0	0	0	0	0	0	0	0	0	0	0	1	0
海南省人民政府办公厅关于印发海南省医药产业“十三五”发展规划指导意见的通知	三、主要任务 (二)加强技术创新,提高核心竞争力。 加强原研药、先进仿制药、新型制剂、南药、黎药、海洋药和智能医疗器械等创新能力建设。积极推动产品研发、检测、安全评价和临床研究公共服务平台建设,培育一批拥有特色技术、高端人才的创新型企业和科技创新基地,提高医药新产品研制能力。以群众用药、临床用药需求和提升全民健康目标为导向,在肿瘤、心脑血管疾病、精神性疾病、妇儿疾病、重大传染性疾病等领域,重点开发具有靶向性、高选择性、新作用机理的治疗药物,重点仿制市场潜力大、临床急需的国外专利到期药品。加快新型抗体、蛋白及多肽等生物药研发和产业化。针对儿童用药需求,开发符合儿童生理特征的新品种、剂型和规格。积极承担国家临床必须的、用量小、市场供应短缺的基本药物定点生产。推进中医药现代化,建立特色重点中药材品种规范化种植(养殖)标准体系,加强中药材、中成药生产、流通及使用追溯体系建设,提高中药产品质量和安…	1	0	1	1	0	0	0	0	0	0	0	0	0	0
山西省人民政府办公厅关于加快发展健身休闲产业的实施意见	五、加强健身休闲设施建设 (三)盘活用好现有体育场馆资源。制定相关政策保障措施,合理利用学校体育设施,节约集约土地资源,减少资源浪费。深化大型体育场馆运营管理改革试点,积极引入社会资本和现代公司化运营机制,努力探索所有权与经营权分离改革模式,盘活体育场馆设施资源。鼓励通过输出品牌、管理、资本、人才等方式开展市场化、专业化运营,打造一流的体育场馆运营管理企业。支持大型体育场馆闲置空间综合利用,完善大型体育场馆综合服务功能,拓展服务领域,提高综合效益。制定中小型体育场馆免费低收费开放政策和补贴政策。	0	0	0	0	0	0	0	0	0	0	1	1	1	0
江西省人民政府办公厅关于改革完善医疗卫生行业综合监管制度的实施意见	三、强化综合监管措施,加强全过程全行业监管 (十二)加强健康产业监管。建立健全覆盖健康产业全链条、全流程的包容、审慎、有效监管机制,明确监管责任,提高监测能力。制定完善新型健康服务监管政策,加强对医疗卫生与养老、旅游、互联网、健身休闲、食品、美容、产后康复等领域融合产生的新产业新业态新模式的监管,完善对相关新技术的审慎监管机制。通过规范试点、开展评估、公开信息、完善投诉和维权机制等多种方式,加强行业指导,营造公平公正的发展环境。加强对药品、医疗器械、康复辅助器具等相关产业的监管,提升相关支撑产业研发制造水平。(省卫生健康委、省委网信办、省发展改革委、省科技厅、省工业和信息化厅、省民政厅、省财政厅、省人力资源社会保障厅、省商务厅、省文化和旅游厅、省国资委、南昌海关、省税务局、省市场监管局、省广电局、省体育局、省医保局、江西银保监局、省药监局按职责分工分别负责)	0	0	0	0	0	0	1	0	0	0	0	0	0	0
河南省人民政府办公厅关于印发河南省2009年度主要污染物总量减排计划实施方案的通知	一、总则 (二)编制依据。 3.河南省环保局、发展改革委、财政厅《关于印发河南省2008-;00年环境自动监控系统建设规划的通知》(豫环文〔2008〕542号);1	0	0	0	0	0	0	0	0	0	0	0	0	0	1
吉林省人民政府办公厅关于印发吉林省深化医药卫生体制改革2012年主要工作安排的通知	三、保障措施 (四)强化宣传引导。 要坚持正确的舆论导向,健全部门、地方医改宣传沟通协调机制,加强主动引导和正面宣传,深入挖掘典型经验,采取贴近群众、深入基层的方式展示改革成效、扩大宣传效果。要及时发布医改进展情况,完善舆情核实机制,主动接受新闻媒体监督,解答和回应社会关心的问题。要调动各方参与医改的积极性、主动性和创造性,充分发挥医务人员主力军作用,为深化改革营造良好的舆论氛围和社会环境。	0	0	0	0	1	0	0	0	0	0	0	0	0	0
河南省人民政府办公厅关于转发河南省医药卫生体制五项重点改革2010年度主要工作安排的通知	二、工作任务 (五)推进公立医院改革试点。根据国家统一部署,洛阳市为国家首批公立医院改革试点城市。濮阳市、漯河市为我省公立医院改革试点城市。 4.调整公立医院布局和结构,完善管理体制。主要工作目标:(1)调整优化公立医院区域布局和结构,明确行政区域内公立医院的设置数量、布局、主要功能和床位规模、大型医疗设备配置。研究探索将部分公立医院转制为非公立医疗机构。(省卫生厅、中医管理局负责)(2)出台进一步鼓励和引导社会资本发展医疗卫生事业的意见,鼓励社会资本进入医疗服务领域。(省发展改革委、卫生厅、中医管理局、财政厅、商务厅、人力资源社会保障厅负责)(3)建立公立医院与城乡基层医疗卫生机构的分工协作机制,加强人员培训交流和业务指导,探索建立社区首诊、双向转诊等分级诊疗制度。(省卫生厅、中医管理局负责)(4)探索政事分开、管办分开的有效形式。完善医院法人治理结构。深化人事制度改革,推行聘用制和岗…	0	0	0	0	1	0	0	0	0	0	1	1	0	0
天津市人民政府批转市环保局、市发展改革委拟定的天津市"十一五"主要污染物总量减排考核办法的通知	第七条市环保局会同市发展改革、市监察和市统计部门对各区县人民政府和有关责任部门年度主要污染物总量减排完成情况进行核查,每年至少一次。	0	0	0	0	0	0	1	0	0	0	0	0	0	0
山西省人民政府关于印发山西省土壤污染防治工作方案的通知	四、组织实施 (二)推进信息公开,引导公众参与和社会监督。 1.加强社会监督。 (110)推进信息公开。由县级以上环保部门统一发布土壤环境状况信息,适时发布土壤环境质量公报。县级以上环保、农业、国土资源等部门要按照职责分工及时公布土壤环境监管信息。重点行业企业要依据国家环境信息公开有关规定,如实向社会公开其产生的重点监控污染物名称、排放方式、排放浓度、排放总量,以及污染防治设施建设和运行情况,接受社会监督。 牵头单位:省环保厅 参加单位:省国土资源厅、省住房城乡建设厅、省农业厅等	0	0	0	0	1	0	0	0	0	0	0	0	0	0
福建省人民政府关于建立全科医生制度的实施意见	六、相关保障措施 (二十八)合理规划全科医生的培养使用。由省卫生厅每年公布全省全科医生规范化培养基地名单及招生名额。建立全科医生信息库,掌握全科医生人员动态。	0	0	0	0	1	0	0	0	0	0	0	0	0	0
吉林省人民政府关于加快推进医药健康支柱产业发展的实施意见	三、保障措施 (一)加强组织领导,形成加快推进医药健康产业发展的合力。 3.加大政府引导性投入。省级医药产业发展引导资金重点扶持医药健康产业自主创新与重大技术提升项目。	0	1	0	0	0	0	0	0	0	0	0	0	0	0
吉林省人民政府办公厅关于印发吉林省建立和规范政府办基层医疗卫生机构基本药物采购机制实施办法(暂行)的通知	三、建立和规范基本药物采购机制的工作要求 (三)加强考核评估。省医改办公室要会同有关部门把基层医疗卫生机构采购基本药物情况作为医改工作评估的核心指标之一,对全省基本药物采购、配送、使用、监管等情况进行考核,并与资金补助挂钩。	0	0	0	0	0	0	0	0	0	0	0	0	1	0
云南省人民政府办公厅关于促进“互联网+医疗健康”发展的实施意见	二、主要任务 (一)以为民惠民为目标,让群众获取医疗健康服务更便捷 1.打造指尖医疗服务。鼓励医疗机构积极应用互联网技术,优化医疗服务流程,构建覆盖诊前、诊中、诊后的线上线下一体化医疗服务模式,为患者提供线上预约、智能导医分诊、就诊提醒、诊间结算、移动支付、检验检查结果查询、信息推送等便捷服务,提高医疗服务效率。到;00年底,全省二级及以上医院普遍能够提供互联网医疗服务。建设全省统一的预约诊疗平台,逐步实现号源集中统一共享,并优先向医疗联合体内基层医疗卫生机构预留预约诊疗号源,推动基层首诊,畅通双向转诊,解决“挂号难”问题。到;00年底,预约时段精确到1小时以内。依托“一部手机办事通”平台,为群众提供内容丰富、高效便捷的指尖医疗服务。(省卫生健康委、省医保局、省人力资源社会保障厅、省政务服务管理局负责,排在第一位的为牵头部门,下同)	0	0	0	0	1	1	0	0	0	0	0	0	0	0
内蒙古自治区人民政府关于水污染防治行动计划的实施意见	四、保障措施和要求 (三)围绕水质改善,筛选储备项目。 各地区、各相关部门要以解决水环境质量问题为导向,针对流域控制单元达标、饮用水水源保护等重点任务,本着实事求是的原则,认真组织好项目的筛选、储备、申报工作。对项目的前期材料准备、申报、实施、验收要进行全过程监管。同时明确资金来源、工程内容、完成时限和责任主体,实施精准管理,确保项目按期保质完成,发挥应有的环境效益。项目的资金来源以地方资金为主,引导和鼓励多种投融资方式。 各地区、各相关部门于;00年10月31日前将分年度实施项目清单及相关支撑材料(项目立项、环评审批等)报自治区水污染防治工作领导小组办公室。	0	0	0	0	0	0	0	1	0	0	0	0	0	0
天津市人民政府办公厅关于印发天津市支持社会力量提供多层次多样化医疗服务实施方案的通知	五、严格行业监管和行业自律 (二十)促进诚信经营。强化社会办医疗机构主体责任和自律管理,社会办医疗机构要公开诊疗科目、服务内容、价格收费等医疗服务信息,开展诚信承诺活动。建立健全医疗机构及从业人员信用记录,纳入全国信用信息共享平台,其中涉及企业的相关记录纳入国家企业信用信息公示系统,并依法推进信息公开。对严重违规失信者依法采取惩戒措施,提高失信成本。鼓励行业协会等第三方开展医疗服务信用评价。建立健全医疗机构监管信息常态化披露制度,卫生计生行政部门要定期公开医疗机构服务质量、违法违规行为查处情况,并通过国家企业信用信息公示系统向社会公示相关行政许可、行政处罚、“黑名单”、抽查检查结果等信息,对进入“黑名单”的机构和人员依法依规严肃处理,促进社会办医疗机构诚信经营。(责任部门:市卫生计生委、市市场监管委)	0	0	0	0	0	0	1	0	0	0	0	1	0	0
海南省人民政府办公厅关于印发海南省医药产业“十三五”发展规划指导意见的通知	医药产业是建立在惠民生保健康基础上的刚需行业。国家高度重视医药产业发展,明确提出发展医药产业是民生需要,同时也是经济社会发展的需要,要求把加快医药产业健康发展和深化医药卫生体制改革结合起来,更好地服务惠民生、稳增长。省委、省政府将医药产业确定为“十三五”重点发展的12个产业之一。我省开展省域“多规合一”试点,也为医药产业发展拓展了更大空间。但也面临产业综合竞争力偏弱、产业政策力度和准度不够、应对药品监管医改政策变化和产业模式变化能力不强等困难。	0	0	0	0	0	0	0	0	1	0	1	0	0	0
内蒙古自治区人民政府办公厅关于印发《内蒙古自治区本级职工基本医疗保险管理办法》等五个办法的通知[附：内蒙古自治区本级职工大额医疗保险管理办法、内蒙古自治区本级职工基本医疗保险费用结算办法、内蒙古自治区本级职工基本医疗保险转诊转院和特殊医疗项目检查及治疗管理办法、内蒙古自治区本级职工基本医疗保险个人账户及社会保障卡管理办法]	第七章附则 第四条外转参保患者确诊后回原定点医疗机构治疗,原定点医疗机构必须接收患者就诊治疗,但不得挂牌住院。	0	0	0	0	0	0	1	0	0	0	0	0	0	0
江西省人民政府关于建立全科医生制度的实施意见	六、为全科医生制度建设提供有力保障 (二十六)加强全科医生培养基地建设。在充分利用现有资源基础上,按照“填平补齐”原则,建设以三级综合医院和有条件的二级医院为临床培养基地,以有条件的社区卫生服务中心、乡镇卫生院和专业公共卫生机构为实践基地的全科医生培养实训网络。省卫生厅会同省教育厅等有关部门按照国家规定制定临床培养基地、实践基地的建设标准和管理办法。加强全科医学师资队伍建设,制定全科医学师资标准,依托有条件的高等医学院校建设区域性全科医学师资培训基地,重点支持基层实践基地师资的培训。	0	0	1	1	0	0	0	0	0	0	0	0	0	0
山西省人民政府关于推进健康中国·山西行动的实施意见	一、总体目标 到;00年,健康促进政策体系基本建立,全民健康素养水平稳步提高,健康生活方式加快推广,基本健康服务更加优质均衡,重大慢性病发病率上升趋势得到遏制,重点传染病、严重精神障碍、地方病、职业病得到有效防控,致残和死亡风险逐步降低,重点人群健康状况显著改善。到;00年,全民健康素养水平大幅提升,健康生活方式基本普及,健康服务能力大幅提升,居民主要健康影响因素得到有效控制,因重大慢性病导致的过早死亡率明显降低,人均健康预期寿命得到较大提高,居民主要健康指标水平总体上好于全国平均水平,健康公平基本实现。	0	0	0	0	0	1	0	0	0	0	0	0	0	0
重庆市人民政府关于印发重庆市畜禽养殖区域划分管理规定和重庆市畜禽养殖区域划分及养殖污染控制实施方案的通知	第一条为防治畜禽养殖业污染环境,促进我市畜禽养殖业健康发展,根据有关法律、法规规定,结合我市实际特制定本规定。	0	0	0	0	0	0	1	0	0	0	0	0	0	0
河南省人民政府办公厅关于印发河南省促进天使风投创投基金高质量发展实施方案河南省数字经济和生物医药新材料政府引导基金设立方案的通知	六、配套机制 省数字经济引导基金配套的管理办法、考核评价、收益让利、投资容错等实施细则,由省发展改革委会同有关部门另行制定。 河南省生物医药新材料政府引导基金设立方案 为大力招引优秀天使风投创投基金,带动社会资本投入生物医药新材料产业,助力企业培育、产业发展,特设立河南省生物医药新材料政府引导基金(以下简称省生物医药新材料引导基金)。	0	0	0	0	0	0	0	1	0	0	0	1	0	0
吉林省人民政府关于加快推进医药健康支柱产业发展的实施意见	二、重点推进工作 (一)做强现代中药产业。立足长白山中药材资源优势和产业基础,坚持增强优势、高端突破,积极推进中药材有效成分提取分离与深度开发,重点支持新药创制和中药大品种二次开发,加强中药材规范化生产,加快现代中药产业的优化升级。到;00年,现代中药产业实现销售产值2580亿元。 3.中成药大品种二次开发与产业化。围绕重大工艺改进、药效物质基础、质量标准、药效机制、临床再评价和药物经济学等内容研究,大力推进肺宁颗粒、丹蒌片等中成药大品种和名优中成药的二次开发与产业化,提升产品质量和核心竞争力。	0	0	0	0	0	0	0	0	1	0	0	0	0	0
宁夏回族自治区人民政府办公厅关于开展大气污染防治工作强化督查的通知	五、督查核查人员组成及任务分工 (六)自治区住房城乡建设厅负责检查城市集中供热工程建设,城市园林绿化,城市建筑、拆迁工地、建成区闲置或未开发的裸露空地扬尘防控,城市道路机械化洒水、清扫,建筑节能和供热计量等工作计划下达、督查检查情况。	0	0	0	0	1	0	0	0	0	0	0	0	0	0
西藏自治区人民政府办公厅转发民政厅等部门关于进一步完善城乡医疗救助制度全面开展重特大疾病医疗救助工作实施意见的通知	一、总体要求 (二)基本原则。 托住底线。坚持从我区经济社会发展水平的实际出发,按照救助对象医疗费用、家庭困难程度和负担能力等因素,科学合理予以救助,确保对象获得必需的基本医疗卫生服务。 统筹衔接。积极推进医疗救助制度城乡统筹发展,加强与基本医疗保险、大额医疗补充保险、疾病应急救助的有效衔接,形成制度合力。加强与慈善事业有序衔接,实现政府救助与社会力量参与的高效联动和良性互动。 公开公正。公开救助政策、工作程序、救助对象以及实施情况,主动接受群众和社会监督,确保过程公开透明、结果公平公正。 高效便捷。优化救助流程,简化结算程序,加快信息化建设,增强救助时效,发挥救急难功能,使困难群众及时得到有效救助。	1	0	0	0	0	1	0	0	0	0	0	0	0	0
甘肃省人民政府办公厅印发关于加快中医药特色发展若干措施的通知	三、实施中医医疗机构体系完善工程 (二)建立名医堂执业平台。依托中医药特色突出、中医药服务能力强、优势明显的中医医疗机构建立一批名医堂执业平台。国医大师、全国名中医、甘肃省名中医、岐黄学者、全国中医药师承教育指导老师等名医团队入驻名医堂的,实行创业扶持、品牌保护、自主执业、自主运营、自主培养、自负盈亏综合政策,打造一批名医团队运营的精品中医机构。鼓励和支持有经验的社会力量兴办连锁经营的名医堂,突出特色和品牌,打造一流就医环境,提供一流中医药服务。(省卫生健康委、省发展改革委、各市州人民政府、兰州新区管委会负责)	0	0	0	0	1	0	0	0	0	0	0	1	0	0
海南省人民政府办公厅关于调整城镇居民基本医疗保险有关政策的通知	一、关于筹资标准 区域统筹区各市、县成年人每人每年筹资标准为210元,其中,中央财政60元,省财政48元,市、县财政12元,个人缴费90元;未成年人每人每年筹资标准为150元,其中,中央财政60元,省财政48元,市、县财政12元,个人缴费30元。中央和省财政对海口市、三亚市参保对象分别按60元/人、18元/人给予补助。对城镇低保对象、重度残疾人和低收入家庭60周岁以上老年人的个人缴费部分财政全额补助,中央财政对学生和儿童按5元/人给予补助,对成年人按30元/人给予补助,余下的个人缴费部分从城市医疗救助资金中列支。 海口市、三亚市的筹资水平不低于区域统筹区各市、县的筹资水平,具体标准由当地政府自行制定。	0	0	0	0	0	0	0	0	0	0	0	0	1	0
甘肃省人民政府办公厅关于印发甘肃省突发公共事件医疗卫生救援应急预案的通知	甘肃省人民政府办公厅关于印发甘肃省突发公共事件医疗卫生救援应急预案的通知 (甘政办发[200830号) 各市、自治州人民政府,省政府有关部门,有关单位: 现将《甘肃省突发公共事件医疗卫生救援应急预案》予以印发,请认真贯彻执行。 甘肃省人民政府办公厅 二○○八年三月二十四日 甘肃省突发公共事件医疗卫生救援应急预案 目录 1总则 l.1编制目的 l.2编制依据 00适用范围 00工作原则 2事件分级 00特别重大事件(Ⅰ级) 00重大事件(Ⅱ级) 00较大事件(Ⅲ级) 00一般事件(Ⅳ级) 3组织体系 00救援领导小组及有关部门职责 00专家组 00救援机构 00现场救援指挥部 4应急反应和终止 00应急反应原则 00分级反应 00现场救援及指挥 5救援保障 00信息保障 00急救网络保障 00应急队伍保障 00应急物资保障 00救援经费保障 00交通运输保障 6公众参与 7附则 00责任与…	0	0	0	0	0	0	0	0	0	0	0	0	0	1
内蒙古自治区人民政府办公厅关于印发《内蒙古自治区本级职工基本医疗保险管理办法》等五个办法的通知[附：内蒙古自治区本级职工大额医疗保险管理办法、内蒙古自治区本级职工基本医疗保险费用结算办法、内蒙古自治区本级职工基本医疗保险转诊转院和特殊医疗项目检查及治疗管理办法、内蒙古自治区本级职工基本医疗保险个人账户及社会保障卡管理办法]	第一章总则 第五条自治区财政部门要加强对基本医疗保险基金的监督和管理;审计部门要定期对医保基金收支和管理情况进行审计;自治区卫生行政部门、药品监督部门要加强对定点医疗机构和定点零售药店的行政管理,积极推进医药卫生体制改革;自治区地税直属征收分局负责自治区本级医疗保险费的征缴。	0	0	0	0	0	0	1	0	0	0	0	0	0	0
福建省人民政府办公厅关于印发加强全民健身场地设施建设发展群众体育实施方案的通知	五、优化运营管理 (十四)完善开放扶持政策。修订完善公共体育场馆免费或低收费开放补助政策,支持体育场馆向社会免费或低收费开放。受补助的公共体育场馆可为体育社会组织提供办公场所,并明确租金优惠比例。鼓励符合条件的企事业单位健身设施向社会开放。 责任单位:省财政厅、体育局、机关事务管理局	0	0	0	0	0	0	0	0	0	0	0	0	1	0
国务院办公厅关于印发深化医药卫生体制改革2014年重点工作任务的通知	重点解决筹资机制不健全、重特大疾病保障机制不完善、医疗服务监管尚需加强、支付方式改革有待深化等问题,进一步巩固完善全民医保体系。;00年职工基本医疗保险、城镇居民基本医疗保险(以下简称城镇居民医保)和新型农村合作医疗(以下简称新农合)三项基本医保参保(合)率稳定在95%以上,城镇居民医保和新农合人均政府补助标准提高40元,达到320元;个人缴费同步新增20元。城镇居民医保和新农合政策范围内住院费用支付比例分别达到70%以上和75%左右,进一步缩小与实际住院费用支付比例之间的差距。适当提高城镇居民医保和新农合门诊统筹待遇水平。重点任务是:	0	0	0	0	0	0	0	0	0	0	0	0	1	0
吉林省人民政府办公厅转发省劳动保障厅等部门关于城镇居民基本医疗保险试点实施意见的通知	三、管理和服务 (七)基金管理与监督。 4.各统筹地区应当建立由政府有关部门代表、医疗机构代表、有关专家和人员等参加的社会监督组织,加强对城镇居民基本医疗保险基金的社会监督。	0	0	0	0	1	0	0	0	0	0	0	0	0	0
海南省人民政府办公厅关于印发海南省医药产业“十三五”发展规划指导意见的通知	三、主要任务 (五)加大营销力度,培育大品种。 抓住国家持续推进医改、完善医疗保障体系的有利契机,支持企业深入研究市场需求,着力做大优势品种、大品种,加大重点产品的宣传和推广,进一步扩大、做实成熟市场,拓展新兴市场,不断增强海南品种市场竞争力。 图表1:“十三五”期间培育10亿元以上、5~10亿元目标品种 图表2:“十三五”期间培育1~5亿元以上目标品种 图表3:“十三五”期间预计获批新投产重点品种	0	0	0	0	0	0	0	0	0	0	0	1	0	0
浙江省人民政府办公厅转发省劳动保障厅、省财政厅关于浙江省国家公务员医疗补助实施意见的通知	三、医疗补助的筹资标准 筹资标准应根据当地两年公费医疗的实际支出(剔除不合理支出部分)、基本医疗保险的筹资水平以及财政的承受能力等情况合理确定。 国家公务员医疗补助筹资标准的确定和调整应适当考虑社会经济发展、物价变动、医疗费用的自然增长和国家公务员个人的承受能力等因素。	0	0	0	0	0	0	0	0	0	0	0	0	1	0
吉林省人民政府办公厅关于转发省劳动保障厅制定的《吉林省省直机关事业单位参加基本医疗保险人员医疗救助办法(试行)》的通知	第十一条省医疗保险经办中心每年将省直医疗救助资金使用情况向省医疗保险制度及医药卫生体制改革:工作领导小组报告,并通报省直各有关单位。	0	0	0	0	1	0	0	0	0	0	0	0	0	0
上海市人民政府关于印发《上海市全民健身实施计划(2011－2015)》的通知	六、组织实施 (二)区县政府要根据本计划,结合当地实际情况,制定本区域的全民健身实施计划。各区县政府每年就实施计划情况进行检查考核。区县体育部门在政府任期届满时,将全民健身实施情况及评估结果报告区县政府和市体育部门。	0	0	0	0	1	0	0	0	0	0	0	0	0	0
国务院关于江苏省镇江市、江西省九江市职工医疗保障制度改革试点方案的批复	第五章 第二十九条 职工就医时,定点医院必须复制一份处方和住院医嘱送达医疗保险机构备查。	0	0	0	0	0	0	1	0	0	0	0	0	0	0
内蒙古自治区人民政府办公厅关于印发自治区2016年度大气污染防治实施计划的通知	三、保障措施 (四)严格考核奖惩 1.;00年12月底698呼和浩特市新城区呼和浩特市福利供热有限公司(际华五三零三)生活供热41436拆并/改气00.08841	0	0	0	0	0	0	0	0	0	0	0	0	0	1
陕西省人民政府办公厅关于印发第一次全省污染源普查方案的通知	二、普查时点、对象、范围和内容 (三)普查内容。 1.工业源。 (1)企业的基本登记信息及其他相关情况,包括企业排污口情况、排水去向等; (2)原材料消耗情况,包括水的使用和消耗量,能源(煤、油、电、气等)结构和消耗量,燃料含硫量,主要有毒有害原辅材料消耗量等; (3)生产产品情况,包括该企业主要产品的种类、产量等; (4)产生污染的设施情况,包括排放大气污染物的锅炉、窑炉等设施,产生废水、固体废物的设施,以及这些设施的种类、数量和规模; (5)各类污染物产生、治理、排放、综合利用情况,各类污染治理设施建设、运行及投入情况等; (6)污染物排放监测情况,包括监测点位、时间、频次,污染物种类和排放浓度、排放量等。	0	0	0	0	1	0	0	0	0	0	0	0	0	0
江苏省政府办公厅关于改革完善全科医生培养与使用激励机制的实施意见	三、保障措施 (二)强化医保政策支持。医保基金要加大对全科医生和签约服务的政策倾斜力度,将符合规定的签约服务项目以及延伸处方、慢性病长处方、家庭病床等新增项目纳入医保支付范围,使医保基金支付给基层医疗卫生机构的比例与参保人员在基层就医比例保持同步增长。鼓励依托基层医疗卫生机构推行门诊统筹按人头付费,探索将签约居民的门诊基金按人头支付给基层医疗卫生机构或家庭医生团队,对于经基层向医院转诊的患者,由基层医疗卫生机构或家庭医生团队支付一定的转诊费用。对纵向合作的医疗联合体等分工协作模式可实行医保总额付费,并加强考核,合理引导双向转诊,发挥全科医生和家庭医生团队在医保费用控制中的“守门人”作用。	0	0	0	0	0	0	0	1	0	0	0	0	0	0
关于印发《湖南省建立健全现代医院管理制度实施方案》的通知	二、建立健全医院治理体系 (二)落实医院经营管理自主权。深化医疗领域“放管服”改革,合理界定政府作为公立医院出资人的举办监督职责和公立医院作为事业单位的自主运营管理权限,实行所有权与经营权分离。公立医院要依法依规进行经营管理和提供医疗服务,行使内部人事管理、专业技术机构设置、中层干部聘任、人员招聘和人才引进、内部绩效考核与薪酬分配、年度预算执行等经营管理自主权,切实加强对内设机构、中层干部和医务人员的监管。落实公立医院用人自主权,公立医院在编制总量内根据业务需要面向社会自主公开招聘医务人员,对紧缺、高层次人才可按规定采取考察的方式予以招聘。进一步改进艰苦边远地区公立医院人员招聘工作,由公立医院合理设置招聘条件,同级人力资源社会保障和卫生计生行政部门审核后,及时招聘人员。(市州、县市区人民政府,省卫生计生委、省财政厅、省编办、省人力资源社会保障厅、省中医药管理局分别负责)	0	0	1	0	1	0	0	0	0	0	0	0	0	0
甘肃省人民政府办公厅关于2012年上半年省政府环保目标责任书落实情况及污染减排工作进展情况的通报	一、省政府环保目标责任书进展情况 (四)工作保障目标。 1.环保经费保障情况。各市州按要求将污染防治、环境监督执法、环境监测和信息、环境宣传教育、放射性和危险废物管理等纳入财政预算管理,各类项目专项配套资金基本落实。	0	0	0	0	1	0	0	0	0	0	0	0	0	0
辽宁省人民政府办公厅关于印发辽宁省城乡居民大病保险实施方案的通知	二、提高保障水平 大病保险要与城乡居民基本医保制度相衔接,参保人因患大病而发生的高额医疗费用,城乡居民基本医保按规定支付后,由大病保险对个人负担的合规医疗费用给予保障。大病保险的起付线标准、支付比例、支付范围等基础性政策实行全省统一。 城镇居民大病保险起付线以个人年度累计负担的合规医疗费用超过上一年度各市城镇居民人均可支配收入的50%确定,并根据城镇居民收入变化情况进行动态调整。农村低保对象、特困供养人员(五保对象)、低保边缘家庭成员等贫困居民大病保险起付线调至上一年度农民人均纯收入的60%,积极推动有条件的市探索将参合农民大病保险起付线调至上一年度农民人均纯收入的60%,到“十三五”末期最终实现全省农村全部参合农民大病保险起付线调至农民人均纯收入的60%以内。	0	0	0	0	0	0	0	1	0	0	0	0	0	0
国务院办公厅关于印发深化医药卫生体制改革2019年重点工作任务的通知	一、研究制定的文件 9.制定建立完善老年健康服务体系的指导意见。 (国家卫生健康委负责,;00年9月底前完成)	0	0	0	0	0	1	0	0	0	0	0	0	0	0
青海省人民政府关于印发青海省城镇居民基本医疗保险试点工作指导意见的通知	四、试点的基本内容 (一)保障方式和参保对象 1.保障方式。住院统筹与门诊统筹相结合,以补助住院医药费用为主,适当补助门诊医药费用。	0	0	0	0	0	0	0	0	0	0	0	0	1	0
湖南省人民政府办公厅关于印发《湖南省重污染天气应急预案》的通知	7.总结评估应急响应终止后需对重污染天气应急响应情况进行总结、评估。预警解除后5个工作日内,相关市州重污染天气应急组织机构要将本行政区域内重污染天气应对情况以书面形式报送省指挥中心办公室,总结评估报告应包括重污染天气应急响应启动情况、采取的措施、取得的成效、发现的问题、污染物应急减排比例等,并针对存在的突出问题提出改进措施等。监测达到黄色预警启动条件而未启动预警的市州也应于5个工作日内报送书面报告。区域联动预警或省级预警解除后,省指挥中心办公室视情组织相关市州人民政府和专家组对重污染天气应对工作进行总结评估,评估报告上报省指挥中心。	0	0	0	0	1	0	0	0	0	0	0	0	0	0
海南省人民政府办公厅关于印发海南省区域统筹区城镇居民基本医疗保险实施办法的通知	第七章奖惩 第三十二条社会保险经办机构及其工作人员有下列行为之一的,由相关部门按有关规定处理;涉嫌犯罪的,移交司法机关处理: (四)擅自更改参保人待遇的;	0	0	0	0	0	0	1	0	0	0	0	0	0	0
甘肃省人民政府办公厅关于印发甘肃省医药卫生体制五项重点改革2011年度主要工作安排的通知	二、工作任务 (三)健全基层医疗卫生服务体系。 9.转变基层医疗卫生机构服务模式,提高服务质量和效率。 (1)鼓励基层医疗卫生机构开展主动服务、上门服务和巡回医疗。鼓励有条件的地方建立全科医生团队,推进家庭签约医生服务,为辖区居民提供方便、连续的健康管理服务。在基层医疗卫生机构大力推广中医药等适宜技术和服务。(省卫生厅负责) (2)大力推行院长(主任)负责制,落实管理责任,提高管理效率。结合基层医疗卫生机构信息化建设,推行规范化、精细化管理,运用基本药物临床应用指南和处方集,规范基层用药和医疗行为,在基层医疗卫生机构全面开展医务人员“四个排队”(将医师用药量、抗菌素使用量、患者自费药使用量、青霉素占抗生素比例进行排队)和医疗机构“八个排队”(将医疗机构中医药收入占总收入比例、门诊输液人次占门诊总人次比例、平均住院费用、平均门诊费用、平均单病种(单次检查)费用、平均住院自费比例、大型设备检…	0	0	0	0	1	0	0	0	0	0	0	0	0	0
云南省人民政府办公厅关于印发云南省深化医药卫生体制改革2014年重点工作任务的通知	二、重点任务 (四)巩固完善基本药物制度和基层运行新机制 4.巩固完善基本药物制度。全面实施国家基本药物目录(;00年版),严格执行国家基本药物各项政策,充分考虑基层用药需求,并以二三级公立医院用药相衔接,规范调整我省基本药物补充药品目录。政府办的基层医疗卫生机构全部配备使用基本药物,提高二三级医院基本药物使用比例。完善政策措施,有序推进村卫生室和非政府办基层医疗卫生机构逐步实行基本药物制度。进一步规范基本药物招采配送机制,把是否通过《药品生产质量管理规范(;00年修订)》(GMP)认证作为质量评价的重要指标。加强基本药物的配送和回款管理,推广省药品集中采购平台直接面对基层医疗卫生机构采购结算的“点对点”采购模式,提高配送效率。严格落实市场清退制度,对采购合同履约不到位、配送不及时的企业加大处罚力度,保障基层用药需求。年内开展1-2次基本药物供应配送督查,确保每次覆盖面不小于30%,并及…	0	0	0	0	1	0	1	0	0	0	0	0	0	0
江西省人民政府办公厅关于印发江西省药品安全突发事件应急预案的通知	1.事件调查组。由省药监局牵头,省卫生健康委、省公安厅等部门组成。负责对引发事件的医疗行为、事件发生的原因和药品质量进行全面调查,提出调查结论和处理意见;组织对相关药品进行监督抽样和应急检验。	0	0	0	0	1	0	0	0	0	0	0	0	0	0
吉林省人民政府办公厅转发省劳动保障厅等部门关于城镇居民基本医疗保险试点实施意见的通知	三、管理和服务 (七)基金管理与监督。 2.建立风险储备基金。各统筹地区按城镇居民基本医疗保险统筹基金收入2%-5%的比例,从当年统筹基金结余中提取风险储备金,风险储备金规模保持在统筹基金年收入的15%,达到规模不再继续提取。风险储备基金作为专项储备资金,主要用于弥补特殊情况下出现的基金支付风险,一般情况下不得动用风险储备金,如确需使用应由经办机构提出申请,经同级劳动保障、财政部门审核,报当地政府批准并报上级劳动保障和财政部门备案后执行。	0	0	0	0	0	0	0	1	0	0	0	0	0	0
新疆维吾尔自治区人民政府办公厅关于印发自治区深化医药卫生体制五项重点改革2010年度主要工作安排的通知	二、工作任务 (一)加快推进基本医疗保障制度建设。 3.提高基本医保基金管理水平。主要工作目标: (2)推行按人头付费、按病种付费、总额预付等支付方式。选择50种左右临床路径明确的疾病开展按病种付费试点。按临床路径管理和试点方案要求,在试点医院和新农合定点医疗机构选择重点病种开展按病种付费试点。探索建立医疗保险经办机构与医疗机构、药品供应商的谈判机制,发挥医疗保险对医疗服务和药品费用的制约作用。(人力资源和社会保障厅、卫生厅分别负责)	0	0	0	0	0	0	0	0	0	0	1	0	0	0
关于印发《湖南省建立健全现代医院管理制度实施方案》的通知	三、完善医院管理制度 (九)健全基本建设和后勤管理制度。坚持规划引领,强化医院发展建设规划编制和项目前期论证,明确医院发展定位、总体布局、床位规模、功能分区、资源配置,严格按规划分步实施建设。建立基建目标和责任全过程管理制度,落实基本建设项目法人责任制、招标投标制、合同管理制、工程监理制、质量终身制等,按照基建投资计划和财务规定严格执行基本建设程序。合理配置适宜医学装备,大型医用设备配置符合国家卫生健康主管部门制定的大型医用设备配置规划,与其功能定位、临床服务需求相适应,优先选择国产医用设备耗材,建立信息化环境下的医院设备、物资、物流精细化管理制度和采购、使用、维护、保养、处置全生命周期管理制度。积极探索“后勤一站式”服务模式,逐步实行后勤服务社会化。	0	0	0	0	1	0	0	0	0	0	0	0	0	0
关于支持社会办医疗机构参与县域医疗卫生服务共同体建设的若干意见	四、促进医共体模式下的第三方服务机构发展。按照细分服务领域、扩大有效供给和培育专业化优势的要求,遵循提升规模效益、降低运营成本和促进同质管理的原则,支持社会力量在县域内建设第三方服务机构,鼓励医共体向具有相应资质的第三方服务机构购买服务,为医共体提供医学检验、医学影像、病理诊断、消毒供应、后勤保障等服务。培育发展面向患者的非医疗转运、住院陪护、生活服务等第三方服务新业态。充分利用第三方服务机构的平台资源和专业优势,鼓励参与技术标准和行业规范的制定,提升相关专业领域质控水平,促进相关服务管理同标同质,推动区域检查、检验结果等互认共享。	0	0	0	0	0	0	0	0	0	1	0	1	0	0
吉林省人民政府办公厅关于推进医疗卫生与养老服务融合发展的实施意见	三、政策措施 (十二)完善财政补贴扶持政策。各地政府要多渠道筹措资金,对符合养老机构设立条件的医养结合机构给予适当支持。社会力量兴建的老年型医疗机构,享受社会资本办医的优惠扶持政策。单独设置康复功能的城市社区日间照料中心、居家养老服务中心、农村养老服务大院和农村社会福利服务中心视情况给予适当资助。(省财政厅牵头,省民政厅、省卫生计生委配合)	0	0	0	0	0	0	0	1	0	0	0	1	1	0
河北省人民政府办公厅关于推进医疗保障基金监管制度体系改革的实施意见	三、创新方式,健全严密有力的基金监管制度体系 (一)健全监督检查制度。推行“双随机、一公开”监管机制,完善日常巡查、专项检查、飞行检查、交叉检查、重点检查、专家审查等相结合的多形式检查制度。检查采取现场检查和非现场检查等方式进行。对群众举报投诉、媒体曝光和其他部门移交的线索进行重点检查。规范执法权限、程序和处罚标准,最大限度减少自由裁量权。积极引入信息技术服务机构、会计师事务所、商业保险机构等第三方力量参与医保基金监管,建立和完善政府购买服务制度,推行按服务绩效付费,提升监管的专业性、精准性、效益性。(责任单位:省医疗保障局、省市场监管局、省财政厅)	1	0	0	0	0	0	0	0	0	1	0	1	0	0
黑龙江省人民政府办公厅关于印发黑龙江省建立现代医院管理制度实施方案的通知	一、总体要求 (一)指导思想。以习近平新时代中国特色社会主义思想为指导,全面贯彻落实党的十九大和全国卫生与健康大会精神,认真落实省第十二次党代会及省委十二届二次全会精神,坚持党的领导,坚持以人民健康为中心,坚持公立医院的公益性,坚持政事分开、管办分开,坚持分类指导、探索创新,实现医院治理体系和管理能力现代化,为推进健康龙江建设奠定坚实基础。	0	0	0	0	0	1	0	0	0	0	0	0	0	0
江苏省人民政府办公厅关于进一步完善医疗救助制度的实施意见	五、健全保障机制 (三)健全结算管理机制。各地要以基本医疗保险信息系统为支撑,进一步健全医疗救助与基本医疗保险、城乡居民大病保险、疾病应急救助、商业保险等信息共享、支付同步、公开透明的“一站式”结算平台。要进一步完善“一站式”结算平台医疗救助模块功能,实时掌握医疗救助对象医疗费用情况、各类医疗保险支付情况、医疗救助实施情况等信息,提升数据统计分析能力,为救助政策制定、救助资金监管等提供数据支持。要进一步强化“一站式”结算平台对象管理,符合救助条件的新增对象在审批当月应当及时纳入结算平台,尽快实现医疗救助对象全部纳入“一站式”结算平台管理。要进一步推进医疗救助异地结算工作,力争实现与基本医疗保险同时同步开通异地就诊即时结算。	1	0	0	0	1	0	0	0	0	0	0	0	0	0
山西省人民政府关于开展城镇居民基本医疗保险试点的实施意见	三、加强管理和服务 (三)服务管理。对城镇居民基本医疗保险的医疗服务管理,原则上参照城镇职工基本医疗保险的有关规定执行,具体办法由试点城市劳动保障部门会同发展改革、财政、卫生等部门制定。要综合考虑参保居民的基本医疗需求和基本医疗保险基金承受能力等因素,合理确定医疗服务的范围,通过订立和履行定点服务协议,规范对定点医疗机构和定点零售药店的管理,明确医疗保险经办机构和定点的医疗机构、零售药店的权利和义务。医疗保险经办机构要简化审批手续,方便居民参保和报销医疗费用;明确医疗费用结算办法,按规定与定点医疗机构及时结算医疗费用。加强对医疗费用支出的管理,探索建立医疗保险管理服务的奖惩机制。积极推行医疗费用按病种付费、按总额预付等结算方式,探索协议确定医疗费用标准的办法。	0	0	0	0	0	0	1	0	0	0	0	0	0	0
内蒙古自治区人民政府办公厅关于印发自治区国民营养计划(2017—2030年)实施方案的通知	二、完善实施策略 (七)普及营养健康知识。 5.15”全国碘缺乏病防治日等为契机,大力开展科普宣教活动,持续开展营养宣传进社区、进学校等活动,有效带动宣教活动常态化,积极营造营养宣传良好氛围。推动将国民营养、食品安全知识知晓率纳入健康城市和健康村镇考核指标。建立营养、食品安全科普示范工作场所,如建立营养食堂、营养和食品安全科普小屋、营养校园及健康企业等。定期开展科普宣传的效果评价,及时指导调整宣传内容和方式,增强宣传工作的针对性和有效性。开展舆情监测,回应社会关注,合理引导舆论,为公众解疑释惑。	0	0	0	0	1	0	0	0	0	0	0	0	0	0
山东省人民政府办公厅认真贯彻落实《关于进一步深化基本医疗保险支付方式改革的指导意见》的通知	四、切实强化各项保障措施 (三)加强宣传,正确引导。要坚持正确的舆论导向,充分调动各方参与医保支付方式改革的积极性、主动性和创造性。加强与新闻媒体的沟通,主动宣传医保支付方式改革取得的进展及成效,及时回应社会关切,为进一步深化医保支付方式改革营造良好的舆论氛围和社会环境。 各市要按照《指导意见》和本通知精神,因地制宜开展相关改革工作,于;00年5月底前制定具体改革实施方案,并报省人力资源社会保障厅备案。 山东省人民政府办公厅 ;00年3月27日	0	0	0	0	1	0	0	0	0	0	0	0	0	0
浙江省人民政府关于十二五时期重污染高耗能行业深化整治促进提升的指导意见	三、主要任务 (五)严格执法检查。 1.开展专项检查。各级政府要组织开展专项检查,查清6大重点行业企业基本情况,并视情作出处理:对无合法环保手续的企业,依法查处,对未补办手续的,不得恢复生产。对卫生防护距离不达标、造成严重污染事故的企业,以及不能稳定达标排放的企业,依法实施限期治理,逾期未完成治理任务的,依法责令停产、关闭。对拒不履行停产整治、责令关闭等决定继续违法生产的企业,依法采取行政强制措施或实施行政强制执行。对依法关闭的企业,各相关部门应及时依法吊销其营业执照和生产许可证等证照。	0	0	0	0	0	0	1	0	0	0	0	0	0	0
重庆市人民政府办公厅关于转发市教委市卫生健康委重庆市加快医学教育创新发展实施方案的通知	二、主要任务 (一)全面优化医学人才培养结构。提升医学专业学历教育层次,大力加强医学学科建设,加大全科医学人才培养力度,加快构建高水平公共卫生人才培养体系,加快高层次复合型医学人才培养。	0	0	1	0	0	0	0	0	0	0	0	0	0	0
广西壮族自治区人民政府办公厅关于印发广西促进“互联网+医疗健康”发展实施方案的通知	二、建立健全“互联网+医疗健康”支撑体系 (十一)推动“互联网+”医疗服务流程优化再造。 1.大力发展基于信息技术的医疗服务流程优化再造,改善医疗服务,加快实现网上预约挂号、预约分诊、移动支付、诊间结算、药品物流配送、检查检验报告推送等信息化惠民便民服务。到;00年,二级以上医院普遍提供分时段预约诊疗、智能导医分诊、候诊提醒、检验检查结果查询、诊间结算、移动支付等线上服务。有条件的医疗卫生机构可以开展移动护理、生命体征在线监测、智能医学影像识别、家庭监测等服务。(责任单位:自治区卫生计生委)	1	0	0	0	0	1	0	0	0	0	0	0	0	0
湖北省人民政府办公厅关于印发加快全省医学教育创新发展实施方案的通知	二、重点任务 (二)全力提升院校医学人才培养质量。 1.传承创新发展中医药教育。注重强化中医药专业在中医药院校中的主体地位,集中优势资源做大做强中医药主干专业。支持湖北中医药大学建设国内一流学科和国家中医药高层次人才培养基地。鼓励湖北中医药高等专科学校等面向基层培养中医药人员。(省教育厅牵头,省卫健委、省发改委、省财政厅、省人社厅、省中医药管理局配合)	0	0	1	0	0	0	0	0	0	0	0	0	0	0
辽宁省人民政府办公厅关于印发《政府办基层医疗卫生机构基本药物集中采购实施办法(试行)》的通知	第三章集中采购 第十六条采购中心通过集中采购确定供货企业后,供货企业要将拟供货的药品样品送省食品药品监管部门备案。省食品药品监管部门要加强对基本药物质量的抽验,对质量出现问题的按照有关规定惩处,并及时向社会公布。	0	0	0	0	0	0	1	0	0	0	0	0	0	0
河南省人民政府办公厅转发关于将在校大学生纳入城镇居民基本医疗保险范围实施意见的通知	河南省人民政府办公厅转发关于将在校大学生纳入城镇居民基本医疗保险范围实施意见的通知 (豫政办〔2009〕126号) 各省辖市人民政府,省人民政府各部门: 省人力资源和社会保障厅、教育厅、财政厅、卫生厅、民政厅制定的《关于将在校大学生纳入城镇居民基本医疗保险范围的实施意见》已经省政府同意,现转发给你们,请认真贯彻执行。 河南省人民政府办公厅 二○○九年七月三十一日 关于将在校大学生纳入城镇居民基本医疗保险范围的实施意见 (省人力资源和社会保障厅、省教育厅、省财政厅、省卫生厅、省民政厅二○○九年七月三日) 根据《国务院办公厅关于将大学生纳入城镇居民基本医疗保险试点范围的指导意见》(国办发〔2008〕119号)精神,为做好我省高等院校在校大学生参加城镇居民基本医疗保险工作,结合我省实际,提出以下实施意见。	0	0	0	0	0	0	0	0	0	0	0	0	0	1
广东省人民政府关于印发“十二五”期间深化医药卫生体制改革实施方案的通知	五、统筹推进相关领域改革,全面优化医药卫生改革工作格局 (九)健全医药卫生监管体制。 8.根据改革进展和实践,及时将医改的成功做法、经验和政策上升为地方性法规或政府规章,推动基本医疗卫生制度地方立法,巩固改革成果,加强法制保障。(由省卫生厅、中医药局、法制办、人力资源社会保障厅、物价局负责)	0	0	0	0	1	0	0	0	0	0	0	0	0	0
广东省人民政府办公厅关于印发广东省深化医教协同进一步推进医学教育改革与发展实施方案的通知	一、改革目标 到;00年,全省医学教育管理体制机制改革取得突破,医学人才使用激励机制得到完善,以“5+3”(;00年临床医学本科教育+;00年住院医师规范化培训或;00年临床医学硕士专业学位研究生教育)为主体、“3+2”(;00年临床医学专科教育+;00年助理全科医生培训)为补充的临床医学人才培养体系基本建立。全省医学教育的规模和结构进一步优化,全科、儿科、精神科等紧缺人才培养得到加强,公共卫生、药学、护理、康复、医学技术等人才培养协调发展,办学水平和人才培养质量进一步提升,对卫生与健康事业的支撑作用明显增强。 到;00年,建成我国南方重要的医学教育高地,标准化、规范化医学人才培养体系更加健全,医学人才队伍满足我省卫生与健康事业发展需求,更好地服务健康广东和卫生强省建设。	0	0	1	0	0	1	0	0	0	0	0	0	0	0
辽宁省人民政府办公厅转发省人力资源社会保障厅等部门关于推进城镇基本医疗保险市级统筹工作意见的通知	四、工作要求 (二)各司其职,分工负责,加快推进市级统筹工作。在推进市级统筹工作中,各市和各有关部门要各司其职,密切配合,共同推进工作进展。 1.人力资源社会保障部门负责研究制定单独统筹县(市、区)纳入市级统筹的有关政策、办法,做好市、县(市、区)政策衔接、综合协调和业务管理工作,确保基金安全、人员连续参保和待遇正常发放,实现平稳过渡。	0	0	0	0	1	0	0	0	0	0	0	0	0	0
山东省人民政府关于山东省淮河流域水污染防治工作目标责任书(2005－2010年)执行情况的通报	一、今年以来《淮河治污责任书》执行情况 (四)环境综合整治情况。 4.城镇生活污水集中处理率。 淮河流域已建成污水处理厂的19个县(市、区)中,城镇生活污水集中处理率达到70%以上的有10个县(市、区),达到60%-70%以上的5个,济宁市任城区、微山县、莒南县、临沭县城镇生活污水集中处理率不足60%。	0	0	0	0	0	0	0	0	0	0	0	0	0	1
河南省人民政府办公厅关于贯彻落实国办发〔2013〕80号文件精神做好深化医药卫生体制改革工作的实施意见	二、工作任务 (二)巩固完善基本药物制度和基层医疗卫生机构运行新机制。 1.健全稳定长效的多渠道补偿机制。落实财政对基层医疗卫生机构运行的补助政策,将基层医疗卫生机构经常性收支差额补助纳入财政预算并及时足额落实到位。保障基本公共卫生服务经费专款专用,不得截留、挪用或挤占。全面实施一般诊疗费政策。发挥医保支付的补偿作用。(省财政厅、卫生厅、人力资源社会保障厅、发展改革委负责)	0	0	0	0	0	0	0	0	0	0	0	0	1	0
重庆市人民政府办公厅关于印发2017年大气污染防治重点工作目标任务分解的通知	六、增强监管能力 开展科学研究 49.按照国家要求,持续开展PM00、PM 10.臭氧污染来源解析,与重点污染源清单形成总量、减量、容量的对应关系,滚动推进,季度更新。 市环保局 有关区人民政府,市发展改革委、市科委	1	0	0	0	0	0	0	0	0	0	0	0	0	0
西藏自治区人民政府办公厅关于进一步加强乡村医生队伍建设的实施意见	二、乡村医生职责 (一)公共卫生服务工作。在乡(镇)卫生院指导下,按照服务标准和规范开展预防接种、传染病防治、儿童保健、孕产妇保健、健康管理、计划生育技术服务、健康教育、重点疾病管理等基本公共卫生服务工作;协助上级专业公共卫生机构落实重大公共卫生服务项目,按规定及时报告传染病疫情和中毒事件,协助处置突发公共卫生事件等。	0	0	0	0	1	0	0	0	0	0	0	0	0	0
山东省卫生健康委员会等部门关于印发《山东省公立医疗机构药品采购推行“两票制”实施方案》的通知	五、监督管理 (三)工业和信息化部门要加强医药工业行业管理,鼓励医药企业开展创新药物研发,引导医药企业实施产品升级,推进医药产业健康发展。	1	0	0	0	0	0	0	0	0	0	0	0	0	0
福建省卫生和计划生育委员会、福建省深化医药卫生体制改革领导小组办公室关于印发福建省进一步改善医疗服务行动实施方案的通知	一、临床路径清晰、风险可控的中、小型择期手术,推行日间手术,提高床位周转率,缩短住院手术等候时间。对病情稳定的放、化疗患者,实行日间治疗。医保部门应将日间治疗有关费用纳入医保报销范畴。 (七)规范诊疗行为,落实行为规范 3.落实医疗行风建设“九不准”。加强医德医风教育,培养良好的职业情操,落实医德医风考评、医师定期考核和不良行为记录等制度。宣传先进典型,开展警示教育,严肃查处红包、回扣等行为。通过宣传教育和制度建设,形成良好的工作机制,使广大医务人员形成拒收红包、回扣良好风尚。	0	0	0	0	1	0	0	0	0	0	0	0	0	0
江苏省残疾预防和残疾人康复实施办法	第一章总则 第四条县级以上地方人民政府领导残疾预防和残疾人康复工作,建立政府主导、部门协作、社会参与、家庭支持的预防和康复机制,实行工作责任制,对有关部门承担的残疾预防和残疾人康复工作进行考核和监督。 县级以上地方人民政府残疾人工作委员会负责组织、协调、指导、督促残疾预防和残疾人康复工作,制定相关政策、规划、计划并组织实施,推动解决重大问题。 县级以上地方人民政府卫生健康、民政、财政、人力资源社会保障、教育、公安、应急管理等部门按照各自职责做好残疾预防和残疾人康复工作。 乡镇人民政府和街道办事处应当根据本地区的实际情况,组织开展残疾预防和残疾人康复工作。	0	0	0	0	1	0	0	0	0	0	0	0	0	0
山西省人民政府办公厅关于印发山西省深化医药卫生体制改革2014年重点工作任务的通知	四、巩固完善基本药物制度和基层运行新机制 (二十一)稳定乡村医生队伍。原则上将40%左右的基本公共卫生服务任务交由村卫生室承担,考核合格后将相应的基本公共卫生服务经费拨付给村卫生室,不得挤占、截留和挪用。加快将符合条件的村卫生室纳入新农合定点,全面实施一般诊疗费政策。基层医疗卫生机构在同等条件下可优先聘用获得执业(助理)医师资格的乡村医生。落实乡村医生养老政策,采取多种方式,妥善解决好老年乡村医生的养老保障和生活困难问题,同步建立乡村医生退出机制。适时对乡村医生政策落实情况进行专项督查。充分发挥基层计生工作者在普及健康知识、提高公民健康素养中的积极作用。(省卫生计生委、省人力资源社会保障厅、省财政厅负责)	0	1	1	0	0	0	0	0	0	0	0	0	0	0
云南省人民政府关于印发云南省“十三五”卫生与健康规划的通知	一、规划背景 (二)“十三五”时期面临的机遇和挑战 党中央、国务院高度重视卫生与健康事业发展,把人民健康放在优先发展战略地位,提出推进健康中国建设,绘就了健康中国的宏伟蓝图。社会各界对卫生与健康的重视程度空前提高,省委、省政府把保障人民健康作为重大民生工程,把全面推进健康云南建设、促进人口均衡发展贯穿于改革发展全过程。各级财政不断加大投入,为卫生与健康事业进一步发展奠定了坚实的基础。人民群众对全面建成小康社会的追求,激发多层次、多样化的健康需求,为健康服务业创造更为广阔的发展空间。我省主动服务和融入国家发展战略,建设面向南亚东南亚辐射中心,为医疗卫生事业带来了开放发展的新机遇。全面依法治国深入推进,为提升卫生与健康治理体系和治理能力现代化水平提供了坚实的法治保障。卫生与健康事业正处于大有可为的战略机遇期,加快改革发展的内外部环境更加有利。 同时,卫生与健康事业发展也面临新的挑战。深化医改…	0	0	0	0	0	0	0	0	0	0	0	0	0	1
天津市人民政府办公厅关于加快发展健身休闲产业的实施意见	二、重点工作 (三)健身休闲设施建设工程。 2.加强特色健身休闲设施建设。发挥国家体育产业基地的引领示范作用,巩固已有各类体育旅游精品项目和运动营地,支持中心城区发展全民健身服务业,支持西部、北部城区发展户外运动产业,支持东部城区发展海上运动休闲产业,鼓励有条件的地区和企业创建国家和市级体育产业基地、体育旅游示范基地、体育旅游精品项目。鼓励城市公园和郊野公园打造健身步道系统,支持在海河景观带沿线等区域建设自行车路网。促进体育设施与园林建设有机融合,重点完成侯台湿地公园等一批体育公园建设。鼓励体育场馆进一步健全完善运动健身、体育培训、竞赛表演、运动指导、健康管理等服务。(责任单位:市体育局、市旅游局、市市容园林委、市交通运输委、市建委、市规划局、市水务局、市国土房管局)	0	0	0	1	0	0	0	0	0	0	1	0	0	0
河南省人民政府办公厅关于印发河南省推进工业结构调整打赢污染防治攻坚战工作方案的通知	二、调整优化产业布局 (一)优化产业布局。 2.主要任务: (1)严格落实能源消费总量和强度“双控”及煤炭消费减量目标任务、污染物排放等总量控制要求,加强重点区域、重点流域、重点行业和产业布局规划环评,调整优化不符合生态环境功能定位的产业布局、规模和结构,严格控制重点流域、重点区域环境风险项目。 (2)加强产业集聚区、经济技术开发区、高新技术产业开发区、工业园区等集中整治,限期进行达标改造,有序退出与主导产业发展冲突的企业。 (3)修订河南省承接产业转移指导目录,不得承接不符合环保政策、产业政策的过剩产能和落后产能。	0	0	0	0	0	0	0	0	1	0	0	0	0	0
湖北省人民政府办公厅关于印发加快全省医学教育创新发展实施方案的通知	三、完善保障措施 (一)加强组织领导。由省政府分管领导牵头,建立由省教育厅、省卫健委、省委组织部、省发改委、省科技厅、省财政厅、省人社厅等部门组成的湖北省医学教育联席会议制度,定期召开会议,研究制定重大政策,推动解决医学教育创新发展重点难点问题。充分发挥医学院校自我组织作用,成立湖北医学教育联盟。实化医学院(部)职能,完善大学、医学院(部)、附属医院医学教育管理运行机制,保障医学教育的完整性。配齐配强医学教育各级管理干部,在现有综合型大学领导职数限额内,加快实现有医学专业背景的高校负责人兼任医学院(部)或附属医院主要负责人。各地、各有关部门要把医学教育创新发展纳入经济社会发展规划和重点工作计划,各医学院校要在;00年3月底前出台加快医学教育创新发展具体工作方案。(省教育厅、省卫健委牵头,省委组织部、省财政厅、省人社厅配合)	0	0	0	0	1	0	0	0	0	0	0	0	0	0
海南省人民政府办公厅关于印发海南省区域统筹区城镇居民基本医疗保险实施办法的通知	第五章医疗服务管理 第二十一条参保人在定点医疗机构发生的医疗费用,符合城镇居民基本医疗保险有关规定的,先由定点医疗机构按照规定直接记帐,再由市、县社会保险经办机构与定点医疗机构按规定审核结算。定点医疗机构应当向住院参保人提供费用清单,并经患者本人或相关代理人、证明人签名确认。凡未经签名确认的医疗费用,统筹基金不予支付。	0	0	0	0	0	0	1	0	0	0	0	0	0	0
陕西省人民政府办公厅关于印发2013年度主要污染物总量减排实施方案的通知	二、;00年度减排项目安排 (四)氮氧化物。共安排减排项目163个,淘汰32691辆黄标车,预计减排00万吨。 5.其他行业减排项目17个,煤改气工程5个、集中供热替代工程项目12个,预计减排00万吨,占总减排量的00%。	0	0	0	0	0	1	0	0	0	0	0	0	0	0
河北省人民政府办公厅关于印发河北省“十四五”医疗卫生服务体系规划的通知	六、健全基层医疗卫生服务体系 (二)提升基层常态化疫情防控能力。充分发挥基层疫情防控预警“哨点”作用,提升疫情早期发现、报告和应对处置能力,夯实“村报告、乡采样、县检测”工作基础。在所有乡镇卫生院和社区卫生服务中心规范设置发热筛查门诊或发热诊室,在所有村卫生室、社区卫生服务站规范设置临时留观室(点),强化预检分诊与发热患者的筛查管理,提升及时发现、依法报告和处置传染病能力。 4.基层疫情防控能力建设。支持乡镇卫生院配备负压救护车,在所有乡镇卫生院和社区卫生服务中心规范设置发热筛查门诊或发热诊室,在所有村卫生室、社区卫生服务站规范设置临时留观室(点)。	0	0	0	1	0	0	0	0	0	0	0	0	0	0
云南省人民政府办公厅关于加快发展商业健康保险的实施意见	二、推动完善医疗保障服务体系 (四)全面推进并规范城乡居民大病保险。从城镇居民医保基金、新农合基金中划出一定比例或数额作为大病保险资金,从;00年起,在全省全面推行城乡居民大病保险。发挥市场机制的作用,按照“收支平衡、保本微利"的原则,公开、公正选择符合要求的商业保险机构受托承办大病保险,提高大病保险运行效率、服务水平和质量。规范商业保险机构承办服务,规范招投标流程和保险合同,明确大病保险结余率和盈利率控制标准,与基本医保和医疗救助相衔接,提供“一站式"服务。建立大病保险结余资金使用和政策性亏损补偿的具体双向风险调节机制,逐步提高城乡居民大病保险统筹层次,建立健全管理办法,增强抗风险能力。(牵头部门:省卫生计生委、人力资源社会保障厅,云南保监局;配合:各州、市人民政府,滇中产业新区管委会)	0	0	0	0	0	0	0	1	0	0	0	1	1	0
江西省人民政府办公厅关于印发江西省支持社会力量提供多层次多样化医疗服务实施方案的通知	四、保障措施 (一)扩大市场开放。 1.降低准入门槛。凡符合规划条件和准入资质的社会办医机构,各级政府不得以任何理由限制。个体诊所设置不受具体数量和地点等规划布局和户籍限制。对社会办医疗机构配置大型医用设备合理放宽规划预留空间。在医疗机构设立审批上,将审核重点放在人员资质与技术服务能力上。允许具有中医类别《医师资格证书》并经注册后在医疗、预防、保健机构中执业满三年,或者具有《中医(专长)医师资格证书》的个人,可以举办中医诊所;允许离退休名老中医在公立医院注册执业的同时,按照医师区域注册有关规定,开办只提供传统中医药服务的中医诊所;允许取得《乡村医生执行证书》的中医药一技之长人员依法依规开办中医诊所。(省卫生计生委负责)	0	0	0	0	0	0	0	0	0	0	0	1	0	0
四川省人民政府办公厅关于将大学生纳入城镇居民基本医疗保险的实施意见	三、主要政策 (二)政府补助。 按照高校财务隶属关系和管理关系,政府补助资金由同级财政负责安排。中央财政对中央所属高校学生按照政府补助标准给予补助;对地方所属高校学生按照城镇居民基本医疗保险补助办法给予补助。省财政对省属高校(含民办高校和科研院所)学生按照所在地地方财政补助标准给予补助;对市(州)所属高校学生按照省财政对市(州)城镇居民基本医疗保险补助办法给予补助。市(州)财政对市(州)属高校学生按照当地政府补助标准,除中央、省财政补助外,给予足额补助。财政补助资金和个人缴费统一纳入城镇居民基本医疗保险基金进行管理。大学生日常医疗所需资金,继续按照高校隶属关系,由同级财政予以补助。	0	0	0	0	0	0	0	0	0	0	0	0	1	0
山西省人民政府办公厅关于印发山西省大气污染防治2013年行动计划的通知	二、重点任务 (一)应完成的任务。 1.特级、一级企业的房屋建筑和市政基础设施工程施工现场达到“优良”,二级企业达到“合格”。(省住房城乡建设厅)	0	0	0	0	0	1	0	0	0	0	0	0	0	0
山西省人民政府办公厅关于印发山西省大气污染防治2013年行动计划的通知	二、重点任务 (二)应启动的任务。 5.启动县(市、区)细颗粒物监测能力、设区市国家直管监测点建设工作、国控重点污染源颗粒物排放在线监测体系以及机动车排污监控平台建设工作。(省环境保护厅)	0	0	0	0	0	1	0	0	0	0	0	0	0	0
福建省人民政府关于印发水污染防治行动计划工作方案的通知	三、主要任务 (一)全面控制污染物排放 3.推进农业农村污染防治 防治畜禽养殖污染。坚持生态先行,疏堵结合,严格养殖准入门槛,实现畜禽养殖转型升级。科学划定畜禽养殖禁养区,具体范围细化到村,按期依法关闭或搬迁禁养区内的畜禽养殖场(小区)和养殖专业户。;00年底前,基本关闭拆除可养区内存栏250头以下、未提出改造方案或改造后仍不能达标排放的生猪养殖户。自;00年起,新建、改建、扩建规模化畜禽养殖场(小区)要实施雨污分流、粪便污水资源化利用。现有规模化畜禽养殖场(小区)要根据污染防治需要,配套建设粪便污水贮存、处理、利用设施。散养密集区要实行畜禽粪便污水分户收集、集中处理利用。;00年底前,全面完成存栏5000头以上生猪规模养殖场标准化改造;;00年底前,全面完成可养区内生猪规模养殖场(存栏250头以上)标准化改造。持续推进延平、尤溪、新罗、永定、武平、南靖、闽侯、福清等8个重点区域的生猪养…	0	0	0	1	0	1	0	0	0	0	0	0	0	0
黑龙江省主要污染物总量减排监测实施办法	第五条监测要求及频次 (一)安装自动监测设备的污染源 由排污单位实时向环保部门传送COD和SO2浓度以及流量。 所在地环境监测站每季度对自动监测设备进行一次在线监测数据有效性判别比对实验,并于每季度最后一个月的20日前将比对实验数据上报省环境监测中心站。	0	0	0	0	1	0	0	0	0	0	0	0	0	0
贵州省人民政府办公厅转发省民政厅等单位关于进一步完善医疗救助制度全面开展重特大疾病医疗救助工作的实施意见的通知	二、全面开展重特大疾病医疗救助 (一)合理确定救助标准。医疗救助对象患重特大疾病就医产生的个人自付合规住院费用,先按基本住院救助比例予以救助,对超过年度基本住院最高救助限额且尚未实施救助的部分,救助比例提高5个百分点,但最高救助比例不超过100%。重特大疾病住院救助金额原则上不得超过基本住院最高救助限额的50%。第一类、第四类救助对象中的长期保障户及80岁以上老年人和第五类救助对象中的重大疾病患者,经重特大疾病医疗救助后仍有个人自付合规住院费的,通过实施医疗扶贫、临时救助以及组织慈善援助帮助解决困难。	0	0	0	0	0	0	0	0	0	0	0	0	1	0
山东省人民政府办公厅关于加快推进我省基层医疗卫生机构综合改革的指导意见	二、主要任务 (十)完善补偿机制。各地要按照《山东省人民政府办公厅关于贯彻国办发〔2010〕62号文件建立健全基层医疗卫生机构补偿机制的实施意见》(鲁政办发〔2011〕12号)要求,加大落实力度,尽快完善多渠道补偿机制。要充分发挥财政投入对综合改革的助推作用,人员经费补助同核定编制数挂钩,同实有人数脱钩,不断提高基层医疗卫生机构减人增效的积极性。省物价局等部门负责制定基层医疗卫生机构一般诊疗费收费标准的指导意见,各市要按照指导意见的要求,加快制定一般诊疗费收费标准,同时合理确定一般诊疗费医保支付政策。在基层医疗卫生机构服务收费和医保报销政策调整的基础上,合理核定基层医疗卫生机构的经常性收支,依据绩效考核结果落实经常性收支差额补助。有条件的地方可以探索实行收支两条线管理。	0	0	0	0	1	0	0	0	0	0	0	0	1	0
陕西省人民政府办公厅关于印发省主要污染物排污权有偿使用和交易试点实施方案的通知	六、部门分工 (二)省财政厅负责会同有关部门制订主要污染物排污权有偿取得收入征收、使用管理制度。	0	0	0	0	1	0	0	0	0	0	0	0	0	0
内蒙古自治区人民政府办公厅关于印发自治区2016年度大气污染防治实施计划的通知	三、保障措施 (四)严格考核奖惩 9.;00年12月底838呼和浩特市赛罕区呼市祥和供热有限责任公司桥靠供热站QXW00生活供热62154拆并/改气00.63261	0	0	0	0	0	0	0	0	0	0	0	0	0	1
海南省人民政府办公厅关于印发海南省2016年度大气污染防治实施计划的通知	二、年度工作任务及责任分工 (八)建立环境污染有奖举报制度。 ;00年6月,省生态环保厅联合省财政厅建立污染有奖举报制度,制定实施《海南省环境污染行为举报奖励管理办法》,鼓励社会组织和公众监督排污企业偷排偷放、城市不文明施工、车辆“冒黑烟”、渣土运输车辆遗撒、秸秆露天焚烧、非法熏烤槟榔等环境违法行为,营造全民参与、社会化治污大格局,努力改善环境空气质量。海口、三亚、儋州;00年同期建立地区环境污染有奖举报制度,其他市县(开发区);00年10月前完成建立。(责任单位:各市县政府、洋浦经济开发区管委会、省生态环保厅、省财政厅)	0	0	0	0	0	0	1	0	0	0	0	0	0	0
海南省人民政府办公厅关于印发海南省推进医疗联合体建设和发展实施方案的通知	三、保障政策 (四)建立与医联体相适应的绩效考核机制。全省各级卫生计生行政部门要加强对医联体绩效考核,将医联体各医疗机构职责和任务落实情况、基层人才结构改善和服务能力提升情况、基层首诊和分级诊疗制度落实情况、医疗费用控制等作为考核内容,重点考核医联体技术辐射带动情况、医疗质量情况和医疗资源下沉情况等,不单纯考核业务量,尤其要将三级医院医疗资源下沉情况、与基层医疗卫生机构协作情况,以及基层诊疗量占比、双向转诊比例、居民健康改善等指标纳入考核体系,探索建立科学合理的医联体整体绩效评估指标体系,实施医联体整体绩效考核。按国家和省相关政策规定,对整体绩效水平高的医联体,要给予表彰和奖励;对整体绩效水平低的医联体,要认真查找原因,分清责任;对医联体内职责履行不到位的医疗机构,考核结果要与医院评审评价、临床重点专科评审等挂钩。在责令其整改的同时,要暂停医院评审、临床重点专科评审资格,经整改符合要求后…	0	0	0	0	1	0	0	0	0	0	0	0	0	0
吉林省人民政府办公厅关于印发吉林省进一步加强乡村医生队伍建设实施方案的通知	九、加强基础建设,改善乡村医生工作条件和执业环境 (十九)进一步加快村卫生室信息化建设与设备配备等工作。依托全省基层医疗卫生机构信息化建设项目,加快推进以农村居民健康档案和基本诊疗为核心的信息系统建设,实现新型农村合作医疗即时结算管理、健康档案和基本诊疗信息联动、绩效考核以及远程培训、远程医疗等功能。力争到;00年年底,为全省村卫生室配置健康一体机及其他基本诊疗设备(含一定数量的中医诊疗设备),确保村卫生室医疗设备可以满足村民基本医疗卫生服务需求。(牵头部门:省财政厅,配合部门:省卫生计生委)	1	0	0	1	0	0	0	0	0	0	0	0	0	0
国务院办公厅关于印发深化医药卫生体制改革2014年重点工作任务的通知	一、加快推动公立医院改革 (八)完善中医药事业发展政策和机制。 研究完善鼓励中医药服务提供和使用的政策,加强县中医院和县医院中医科基本条件和能力建设,积极引导医疗机构开展成本相对较低、疗效相对较好的中医药诊疗服务。继续实施基层中医药服务能力提升工程。研究制订中医药发展战略规划,提出加快中医药发展的政策措施。 (中医药局、发展改革委、卫生计生委、财政部、人力资源社会保障部负责)	0	0	0	0	1	0	0	0	0	0	0	0	0	0
江苏省政府办公厅关于印发江苏省“十三五”食品药品安全规划的通知	三、主要任务 (三)加强食品全程监管。 2.强化食用农产品生产源头治理。严格控制农业外源性污染,继续做好土壤重金属污染监测和修复试点工作。加强投入品监管,推进农资农技连锁经营,全面实行高毒农药定点经营,探索完善高效低毒农药、商品有机肥等农业投入品补贴制度,因地制宜加快推广苏州等地农药零差率统一配供经验。加强农药安全风险管控和登记评估工作,到;00年基本覆盖主要特色作物和蔬菜。农药、兽药、饲料及饲料添加剂基本建立电子追溯码监管制度。全面推行农业标准化生产,推进实施农业(农村)标准化试点示范项目,支持国有农场、龙头企业、农民合作社等率先实现标准化。深入发展无公害农产品、绿色食品、有机农产品和农产品地理标志等“三品一标”,扩大安全优质食用农产品生产规模。加大绿色食品标准化生产技术推广应用,创建无公害农产品、绿色食品、有机农产品和农产品地理标志示范区。	0	0	0	0	0	1	1	0	0	0	1	0	1	0
吉林省人民政府办公厅关于加强全民健身场地设施建设发展群众体育若干措施的通知	二、充分挖掘存量建设用地潜力 (三)统筹规划建设全民健身场地设施。在不改变、不影响公共服务建设用地主要用途的前提下,统筹规划,对文化娱乐、教育、养老、体育健身等功能进行整合,复合利用土地规划建设全民健身场地设施。(省体育局、省文化和旅游厅、省教育厅、省民政厅负责)	0	0	0	1	0	0	0	0	0	0	0	0	0	0
内蒙古自治区人民政府办公厅关于印发2016年度水污染防治计划的通知	三、重点任务 (二)强化城镇生活污染治理。 2.;00年9月底,各盟市要完成城镇污水处理厂污泥堆放点排查和规范化改造工作,杜绝污泥二次污染。开展城镇污水处理厂现有污泥处理处置设施达标改造工作,推进地级城市污泥处理处置中心建设,;00年底,地级城市污泥无害化处理率达到70%以上。(自治区住房城乡建设厅牵头,自治区发展改革委、经济和信息化委、农牧业厅、环保厅等部门参与)	0	0	0	1	0	1	0	0	0	0	0	0	0	0
贵州省人民政府办公厅转发省民政厅等单位关于进一步完善医疗救助制度全面开展重特大疾病医疗救助工作的实施意见的通知	进一步完善医疗救助制度,全面开展重特大疾病救助工作是完善社会救助体系,保障和改善民生,打好社会保障兜底攻坚战的重要举措,各地各相关部门要进一步提高思想认识、加强组织领导、完善工作机制、强化工作措施,最大限度减轻困难群众医疗支出负担。	0	0	0	0	1	0	0	0	0	0	0	0	0	0
云南省人民政府关于进一步加强“十二五”全省主要污染物总量减排工作的若干意见	四、主要工作措施 (十四)加强节能发电调度和电力需求侧管理。改革发电调度方式,优先安排节能、环保、高效火电机组发电上网。电力监管部门要加强对节能环保发电调度工作的监督。	0	0	0	0	1	0	0	0	0	0	0	0	0	0
内蒙古自治区人民政府办公厅关于印发自治区2016年度大气污染防治实施计划的通知	三、保障措施 (四)严格考核奖惩 30.;00年6月556阿拉善盟阿拉善经济开发区3采暖00.5拆除00.487	0	0	0	0	0	0	0	0	0	0	0	0	0	1
新疆维吾尔自治区人民政府办公厅关于印发自治区2013年主要污染物排放总量控制计划的通知	三、保障措施 (一)严格落实目标责任。各地州市、县(市)人民政府(行政公署)是污染减排的责任主体,对本行政区域污染减排工作负总责。要切实发挥政府主导作用,加强对污染减排工作的组织领导、监督检查和考核奖惩。各相关部门要各司其职,密切配合,共同推进污染物排放总量控制工作。环保部门负责组织实施总量控制计划和加强污染源监督管理;发改部门负责制定和落实节能减排政策;经信部门负责淘汰和关停落后产能;住房城乡建设部门负责完善城镇生活污水处理管网设施;农业、畜牧部门负责推进农业及畜禽养殖业污染综合整治;公安交管部门负责淘汰老旧机动车。各排污单位是污染减排的实施主体,要切实履行排污减排主体责任,增强污染减排的主动性和自觉性,严格执行各项环保法律法规,落实计划确定的目标任务。	0	0	0	0	1	0	0	0	0	0	0	0	0	0
云南省人民政府关于进一步加强“十二五”全省主要污染物总量减排工作的若干意见	七、省住房城乡建设厅 (二)督促指导已建成城镇污水处理厂的运行管理,督促指导现有城镇污水处理厂深度处理与升级改造,提高出水水质。完善配套污水管网系统,提高运行负荷率和污水处理率。	0	0	0	0	1	0	0	0	0	0	0	0	0	0
内蒙古自治区人民政府办公厅关于印发自治区2016年度大气污染防治实施计划的通知	三、保障措施 (四)严格考核奖惩 7.;00年12月底823呼和浩特市玉泉区内蒙古航空职业技术学校立式炉生活供热1359拆并/改气00.00.51	0	0	0	0	0	0	0	0	0	0	0	0	0	1
天津市人民政府办公厅关于调整完善医疗保障政策减轻困难家庭医疗负担的意见	一、调整居民医疗保险政策 (四)调整学生儿童医疗保险结算期。从;00年起,将学生儿童医疗保险结算期由学年度调整为自然年度。;00年9月至12月期间发生的医疗费用由医疗保险基金按规定解决。 以上医疗保险政策自;00年1月1日起实施。	0	0	0	0	0	0	1	0	0	0	0	0	0	0
山西省人民政府办公厅关于印发山西省水污染防治2016年行动计划的通知	三、重点任务 (八)严格环境执法监管。 5.开展《山西省污水综合排放标准》制定、《山西省地表水水环境功能区划》修订工作。(省环保厅牵头,省住房城乡建设厅、省水利厅、省农业厅、省质监局等参与,各市人民政府配合)	0	0	0	0	1	0	0	0	0	0	0	0	0	0
河南省人民政府办公厅转发河南省公共卫生与基层医疗卫生事业单位绩效工资实施意见的通知	三、绩效工资总量和水平的核定 (一)公共卫生与基层医疗卫生事业单位绩效工资总量由相当于单位工作人员上年度12月份基本工资的额度和规范后的津贴补贴构成。绩效工资水平由县级以上人力资源社会保障、财政部门按照与当地事业单位工作人员平均工资水平相衔接的原则核定。各地结合实际确定具体核定办法。	0	0	0	0	0	0	1	0	0	0	0	0	0	0
海南省人民政府办公厅关于印发海南省医疗健康产业发展“十三五”规划的通知	一、我省医疗健康产业发展基础和面临形势 (一)发展基础。 2.基本医疗和公共卫生服务体系初步具备了支撑健康产业发展的能力。全省各级公立医疗机构基础设施得到明显改善,海口、三亚、琼海、儋州、五指山五大区域医疗中心初步建立。截至;00年年底,全省医疗卫生机构数为5046家,其中:医院202个,基层医疗卫生机构4714个,专业公共卫生机构119个,其他医疗卫生机构11家。每千人口执业(助理)医师00人(国家00人),每千人口注册护士00人(国家00人);每千人口拥有床位00张(国家00张)。婴儿死亡率00‰(国家00‰),孕产妇死亡率00/10万(国家00/10万),基本达到我国东部省份水平。	0	0	0	0	0	0	0	0	0	0	0	0	0	1
河北省人民政府办公厅关于印发河北省“十四五”医疗卫生服务体系规划的通知	三、总体布局与资源配置 (五)技术。 4.县级临床重点专科。支持不少于600个县级临床重点专科建设项目,提升专科医疗服务能力,做好县域居民健康“守门人”。	0	0	0	0	1	0	0	0	0	0	0	0	0	0
湖北省人民政府办公厅关于做好今冬明春大气污染防治工作的通知	自《大气十条》实施以来,我省出台了一系列政策措施,做了不少工作,也取得了一定的成效。特别是今年以来,在一季度PM10浓度不降反升,且持续恶化的被动局面下,各地、各部门突出问题导向、加强工作调度、强化工作举措、严格督办检查,全省纳入国家考核范围的12个地市从6月份开始,PM10累计平均浓度实现同比连续5个月下降。1-10月,纳入国家考核范围地市的PM10平均浓度为103微克/立方米,较;00年同期下降00%,但仍高于;00年同期,距国家下达我省的;00年度目标(97微克/立方米)差距依然较大。 历年监测数据表明,冬季是大气污染较为集中的时期,;00年、;00年四季度全省PM10平均浓度分别超过全年平均浓度的	0	0	0	0	0	0	0	0	0	0	0	0	0	1
福建省人民政府办公厅关于印发2005年度全省治理“餐桌污染”建设“食品放心工程”工作方案的通知	由省卫生厅承办,经贸委、教育厅、工商局、环保局、南昌铁路局福州办事处协办。治理目标:全省学校、企事业单位食堂、酒店、宾馆、旅社、饮食摊点各项卫生指标基本达到国家和省地方标准,各类熟食摊点食品基本符合国家或省有关食品卫生标准。主要措施:	0	0	0	0	0	0	0	0	0	0	0	0	0	1
青海省人民政府关于进一步加强药品安全监管工作的意见	二、主要任务 (二)全面加强高风险药品质量安全监管。 7.强化院内制剂质量监管。积极推进制剂室规范化建设,完善制剂炮制规范,严格执行制剂质量标准和有关技术、工艺,规范制剂配制。市州级市场监管部门要联合卫生健康部门强化对本行政区域内医疗机构制剂室的监督检查。加大制剂抽检力度,依法处置不合格产品和违法违规行为,监督检查结果及时通报同级卫生健康部门。落实医联体(医共体)内调剂使用医疗机构制剂的惠民政策,支持民族药产业健康发展。(省卫生健康委、省市场监管局、省药品监管局,各市州政府按职责分工负责)	0	0	0	0	0	0	1	0	0	0	0	0	0	0
国务院办公厅关于加快发展商业健康保险的若干意见	三、扩大商业健康保险供给 (一)丰富商业健康保险产品。大力发展与基本医疗保险有机衔接的商业健康保险。鼓励企业和个人通过参加商业保险及多种形式的补充保险解决基本医保之外的需求。鼓励商业保险机构积极开发与健康管理服务相关的健康保险产品,加强健康风险评估和干预,提供疾病预防、健康体检、健康咨询、健康维护、慢性病管理、养生保健等服务,降低健康风险,减少疾病损失。支持商业保险机构针对不同的市场设计不同的健康保险产品。根据多元化医疗服务需求,探索开发针对特需医疗、药品、医疗器械和检查检验服务的健康保险产品。开发药品不良反应保险。发展失能收入损失保险,补偿在职人员因疾病或意外伤害导致的收入损失。适应人口老龄化、家庭结构变化、慢性病治疗等需求,大力开展长期护理保险制度试点,加快发展多种形式的长期商业护理保险。开发中医药养生保健、治未病保险产品,满足社会对中医药服务多元化、多层次的需求。积极开发满足老年人…	0	0	0	0	0	0	0	1	0	0	1	0	0	0
甘肃省人民政府办公厅印发关于加快中医药特色发展若干措施的通知	九、实施中医药环境优化工程 (三)完善中医药服务价格和医保政策。稳妥有序推动医疗服务价格改革,建立突出中医特色的医疗服务价格体系。完善中医药服务分级定价政策,优化比价关系。医疗服务价格动态调整时,重点将功能疗效明显、患者广泛接受、甘肃特色优势突出、应用历史悠久的中医医疗服务项目纳入调价范围进行适当倾斜,充分考虑中医医疗服务特点及中医医务人员的劳务价值。按照《国家基本医疗保险药品目录》省级调整权限,将临床价值高、经济性评价优良的中医诊疗项目、民族药、中药饮片和医疗机构中药制剂按规定纳入我省基本医疗保险支付范围。支持我省中医药传承创新发展,对《国家基本医疗保险药品目录》中的中药饮片和省级权限调整的有地方标准的中药饮片实行“甲类”支付;按照国家规定,对省级权限调整的民族药、医疗机构制剂实行“乙类”支付,并健全动态调整和退出机制。探索符合中医药特点的医保支付方式,鼓励实行中西医同病同效同价。一般…	0	0	0	0	0	0	0	0	0	0	0	1	1	0
海南省人民政府办公厅关于印发海南省医疗健康产业发展“十三五”规划的通知	一、我省医疗健康产业发展基础和面临形势 (一)发展基础。 6.海南国际旅游岛建设稳步推进为医疗健康产业的发展提供了旺盛的市场需求。随着海南国际旅游岛建设的稳步推进,吸引了越来越多国内外游客来海南度假旅游。;00年全省接待游客00万人次,较;00年增长00%;其中旅游过夜人数00万人次,增长00%。特别是每年冬季由全国各省市来海南休闲、养生、养老的“候鸟人群”已达110万。据抽样统计调查,90%的游客希望在海南获得多样化的健康服务。	0	0	0	0	0	0	0	0	0	0	0	0	0	1
甘肃省人民政府办公厅关于印发甘肃省医药卫生体制五项重点改革2011年度主要工作安排的通知	二、工作任务 (五)积极稳妥推进公立医院改革。 7.鼓励和引导社会资本举办医疗机构,形成多元办医格局。 (1)完善区域卫生规划和医疗机构设置规划,严格控制公立医院建设规模、标准和贷款行为,新增或调整医疗卫生资源在符合准入标准的条件下优先考虑社会资本。研究确定公立医院改制的范围和办法,稳妥推进公立医院改制。(省发展改革委、省财政厅、省卫生厅负责) (2)按照相关规章、办法及实施细则和配套文件精神,落实鼓励和引导社会资本举办医疗机构的政策,促进非公立医疗机构发展。鼓励社会资本举办普通医疗机构,支持社会资本举办高端医疗机构,控制公立医院开展特需服务的比例。(省卫生厅、省商务厅负责)	0	0	0	0	0	0	0	0	0	0	0	1	0	0
山东省人民政府办公厅关于加快推进我省基层医疗卫生机构综合改革的指导意见	三、实施步骤 (五)考核评估,总结验收。省卫生厅牵头制定基层医疗卫生机构综合改革考核评价标准。基层医疗卫生机构综合改革完成后,各地要及时考核评估,总结经验,不断完善,确保改革成效。在各县(市、区)总结自评的基础上,各设区的市要对辖区内的县(市、区)逐一考核验收,验收结果于9月底前上报省政府。省政府将对各设区的市基层医疗卫生机构综合改革完成情况进行重点考核。	0	0	0	0	1	0	0	0	0	0	0	0	0	0
广东省人民政府办公厅关于印发广东省医疗卫生领域省级与市县财政事权和支出责任划分改革实施方案的通知	一、主要内容 (五)相关项目的执行标准。 3.地方公共卫生服务、医疗救助、卫生健康能力提升、中医药事业传承与发展等4项暂不具备统一制定基础标准的条件,省提出原则要求并设立绩效目标,市县可结合实际自主制定本地区标准。	0	0	0	0	1	0	0	0	0	0	0	0	0	0
重庆市人民政府办公厅关于印发重庆市进一步深化基本医疗保险支付方式改革实施方案的通知	一、总体要求 (二)基本原则。 4.统筹推进。统筹推进医疗、医保、医药各项改革,注重改革的系统性、整体性、协调性,发挥部门合力,多措并举,实现政策叠加效应。	0	0	0	0	1	0	0	0	0	0	0	0	0	0
吉林省人民政府办公厅关于加强全民健身场地设施建设发展群众体育若干措施的通知	三、提升健身设施建设与管理水平 (一)提高健身场地设施项目审批效率。相关职能部门在涉及全民健身场地设施项目审批时,要在确保生态环境安全、安全生产、节约用地的基础上,进一步简化、优化审批程序,提高审批效率。(省发展改革委、省自然资源厅、省生态环境厅、省住房城乡建设厅、省体育局、省应急厅、省林草局、省水利厅和各市〔州〕、县〔市〕政府负责)	0	0	0	0	1	0	0	0	0	0	0	0	0	0
西藏自治区人民政府办公厅关于转发环境保护厅“十二五”主要污染物总量减排考核办法的通知	第六条主要污染物总量减排工作情况的考核内容主要包括三个方面: (二)主要污染物总量减排统计监测考核体系的建设运行情况。监测体系建设运行情况依据国家重点监控企业名单核实主要污染物自动监测设备的建设和联网情况、监控数据传输情况、监测结果公开情况进行评定。统计体系和考核体系建设运行情况依据各地相关文件和抽查复核情况进行评定。	0	0	0	0	1	0	0	0	0	0	0	0	0	0
云南省人民政府办公厅关于印发全省发展中医药大会重点任务分解方案的通知	四、着力培养高素质中医药人才队伍 (十八)加强基层中医药人才培养继续加大县乡中医临床技术骨干和农村订单定向中医专业学生培养力度,组织实施好中医类别全科医师培养和住院医师规范化培训。加大乡村医生中医药基本知识和基本技能培训,将乡村医生中医药培训考核与执业准入挂钩。将农村具有一技之长的中医药人员通过考核、培训纳入乡村医生管理,允许在农村地区举办只提供传统中医药服务的个体诊所。加大基层中医药人才引进、培养力度,到;00年底,中医药人员占基层医疗机构医药人员的20%以上。(牵头单位:省卫生计生委,各州、市、县、区人民政府;配合单位:省财政厅、教育厅)	0	0	1	0	0	1	0	0	0	0	0	0	0	0
青海省人力资源和社会保障厅关于印发青海省加快推进医疗保险支付方式改革实施方案的通知	青海省人力资源和社会保障厅关于印发青海省加快推进医疗保险支付方式改革实施方案的通知青海省人力资源和社会保障厅关于印发青海省加快推进医疗保险支付方式改革实施方案的通知青政办[2015220号各市、自治州人民政府,省政府各委、办、厅、局:《青海省加快推进医疗保险支付方式改革实施方案》已经省深化医药卫生体制改革领导小组会议审议通过,现印发给你们,请认真贯彻执行。青海省加快推进医疗保险支付方式改革实施方案根据《青海省人民政府关于印发深化医药卫生体制改革综合试点方案的通知》(青政〔2015〕15号)精神,结合我省实际,制定本实施方案。	0	0	0	0	0	0	0	0	0	0	0	0	0	1
新疆维吾尔自治区人民政府办公厅关于印发自治区2013年主要污染物排放总量控制计划的通知	一、指导思想、编制原则和总量控制目标 (二)编制原则 3.可操作的原则。根据国家、自治区总量控制要求,结合排污单位实际,将减排任务落实到单位和项目,明确具体措施,增强操作性。	0	0	0	0	0	1	0	0	0	0	0	0	0	0
西藏自治区人民政府办公厅关于转发环境保护厅“十二五”主要污染物总量减排考核办法的通知	第六条主要污染物总量减排工作情况的考核内容主要包括三个方面: (一)主要污染物减排目标完成情况。按照主要污染物总量减排统计办法、监测办法和总量减排核算细则相关规定予以核定。	0	0	0	0	0	0	1	0	0	0	0	0	0	0
广东省人民政府关于印发“十二五”期间深化医药卫生体制改革实施方案的通知	二、加快全民医保体系建设,着力提升医疗保障和管理水平 (三)完善基本医保管理体制。 8.按照管办分开原则,完善基本医保管理和经办运行机制,明确界定职责,进一步落实医保经办机构的法人自主权,提高经办能力和效率。(由省编办,省人力资源社会保障厅、卫生厅负责)	0	0	0	0	1	0	0	0	0	0	0	0	0	0
青海省人民政府关于印发青海省城镇居民基本医疗保险试点工作指导意见的通知	五、工作措施 (二)加强宣传动员。充分利用广播、电视、报纸等各种宣传手段,广泛深入地宣传居民医保的政策和具体规定,引导城市居民积极参保。	0	0	0	0	1	0	0	0	0	0	0	0	0	0
福建省人民政府办公厅关于印发2005年度全省治理“餐桌污染”建设“食品放心工程”工作方案的通知	八、其他有关分工 (五十九)由省新闻出版局负责,省工商局、公安厅、质监局配合,开展食品商标、标识、包装物印刷业的专项整治,严厉查处非法印刷食品假包装、假标识、假商标的单位和个人。	0	0	0	0	1	0	0	0	0	0	0	0	0	0
福建省人民政府办公厅关于完善公立医疗机构药品集中采购工作的若干意见	福建省人民政府办公厅关于完善公立医疗机构药品集中采购工作的若干意见 (闽政办〔2015〕124号) 各市、县(区)人民政府,平潭综合实验区管委会,省人民政府各部门、各直属机构,各大企业,各高等院校: 改革公立医疗机构药品集中采购制度是深化公立医院综合改革,控制医疗费用不合理增长,抑制药品流通领域腐败现象,缓解群众“看病贵”的重要环节。根据《国务院办公厅关于完善公立医院药品集中采购工作的指导意见》(国办发〔2015〕7号)和《国家卫生计生委关于落实完善公立医院药品集中采购工作指导意见的通知》(国卫药政发〔2015〕70号)精神,按照省委、省政府制定的《福建省深化医药卫生体制改革综合试点方案》(闽委发〔2015〕3号)中关于改革公立医院药品集中采购办法的工作部署,结合我省实际,制定本意见。	0	0	0	0	0	0	0	0	0	0	0	0	0	1
山西省人民政府关于印发山西省土壤污染防治工作方案的通知	四、组织实施 (二)推进信息公开,引导公众参与和社会监督。 2.引导公众参与。 (111)鼓励公众通过“12369”环保举报热线、信函、电子邮件、政府网站、微信、微博平台等途径,对存在乱排废水、废气,乱倒废渣、污泥等污染土壤环境违法行为的任何单位和个人进行监督和举报,举报查证属实的给予奖励。有条件的地方可根据需要聘请环境保护义务监督员,参与现场环境执法、土壤污染事件调查处理等。鼓励种粮大户、家庭农场、农民合作社以及民间环保机构参与土壤污染防治工作。 牵头单位:省环保厅 参加单位:省国土资源厅、省住房城乡建设厅、省农业厅等	0	0	0	0	1	0	0	0	0	0	0	0	0	0
广西壮族自治区人民政府办公厅关于印发广西促进养老托育服务健康发展三年行动方案（2021—2023年）的通知	三、主要任务 (四)完善养老托育服务综合监管体系。 7.完善养老托育统计指标。依据养老产业统计分类,开展广西养老产业认定办法研究工作;推进重要指标年度统计,探索构建托育服务统计指标体系。;00年底,研究出台广西养老产业认定办法。	0	0	0	0	1	0	0	0	0	0	0	0	0	0
浙江省人民政府关于十二五时期重污染高耗能行业深化整治促进提升的指导意见	三、主要任务 (四)规范日常管理。 3.严防突发环境事故。6大重点行业企业及所在工业园区要编制环保应急预案,配备相应的环境风险防范设施和应急物资,定期开展污染事故应急演练,提高环境事故应急应对能力。厂区必须按规范要求设置应急事故池,应急事故池的容积应满足相关技术规范的要求;事故源切断系统应设置电动和手动两套系统;危险化学品储存区必须设置应急围堰。要积极开展环境风险评估,积极投保环境污染责任险,减少和分担突发环境事故引发的环境风险。	0	0	0	0	1	0	0	0	0	0	0	0	0	0
江苏省政府办公厅关于印发江苏省“十三五”食品药品安全规划的通知	五、保障措施 (二)完善工作机制,加强规划实施协调。 各地、各有关部门要加强沟通协调,健全完善信息通报、形势会商、风险交流、协调联动等制度,强化省市之间、部门之间的协调配合,及时解决规划实施过程遇到的困难和问题。充分发挥各级食安委及其办公室的作用,统筹协调、监督指导各成员单位落实规划实施责任,优化资源配置,形成实施合力。	0	0	0	0	1	0	0	0	0	0	0	0	0	0
黑龙江省人民政府办公厅关于印发黑龙江省“十四五”促进养老托育服务健康发展实施方案的通知	二、扩大多方参与,提升养老托育服务供给质量 (三)专项行动。 2.城乡养老托育配套用房建设行动。在城市居住社区建设补短板和城镇老旧小区改造中统筹推进养老托育服务设施建设,新建住宅小区或居住区按标准规划建设社区居家养老服务用房及与常住人口规模相适应的婴幼儿照护服务设施,并确保新建住宅小区与配套养老托育服务设施同步规划、同步建设、同步验收、同步交付,已建成住宅小区或居住区有缺口的,通过购置、置换、租赁、改造等方式补足或建设。	0	0	0	1	0	0	0	0	0	0	0	0	0	0
甘肃省人民政府办公厅关于印发甘肃省医药卫生体制五项重点改革2011年度主要工作安排的通知	二、工作任务 (四)促进基本公共卫生服务逐步均等化。 10.全面开展9类基本公共卫生服务,提高居民健康素质。 (1)拓展和深化基本公共卫生服务内容,扩大服务人群,提高服务质量,;00年人均基本公共卫生服务经费标准提高到25元。(省卫生厅、省财政厅负责) (2)完善并严格执行9类国家基本公共卫生服务项目服务标准、操作规范和考核办法,提高服务水平。城乡居民健康档案规范化电子建档率达到50%左右。进一步提高儿童保健、孕产妇保健等基本公共卫生服务质量。做好农民工基本公共卫生服务。为65岁及以上老年人每年进行健康危险因素调查和体格检查。高血压、糖尿病管理人数分别提高到71万人、26万人以上。对发现的重性精神疾病患者全部纳入管理。(省卫生厅、省财政厅负责) (3)采取多种渠道宣传普及健康知识,完善基层健康宣传网络,倡导健康生活方式,促进全民健康素质的提高。(省卫生厅负责)	0	0	0	0	1	1	0	0	0	0	0	0	0	0
内蒙古自治区人民政府办公厅关于印发自治区2016年度大气污染防治实施计划的通知	三、保障措施 (四)严格考核奖惩 5.;00年12月底688呼和浩特市新城区呼和浩特市昱昊供热有限公司(天和车小锅炉房)QXW7生活供热103590拆并/改气00.7212	0	0	0	0	0	0	0	0	0	0	0	0	0	1
福建省人民政府关于印发水污染防治行动计划工作方案的通知	三、主要任务 (五)全力保障水生态环境安全 5.严格控制环境激素类化学品污染。;00年底前完成环境激素类化学品生产使用情况调查,监控评估水源地、农产品种植区及水产品集中养殖区风险,实施环境激素类化学品淘汰、限制、替代等措施。(省环保厅牵头,省经信委、农业厅、海洋渔业厅等参与)	0	0	0	0	1	0	0	0	0	0	0	0	0	0
江西省人民政府办公厅关于印发江西省国民营养计划(2018—2030年)实施方案的通知	二、主要实施策略 (六)加强营养健康基础数据共享利用。大力推动营养健康数据互通共享。依托现有信息平台,加强营养与健康信息化建设,完善食物成分与人群健康监测信息系统。构建信息共享与交换机制,推动互联互通与跨行业数据共享。建立营养健康数据标准体系和电子认证服务体系,切实提高信息安全能力。积极推动“互联网+营养健康"服务和促进大数据应用试点示范,带动以营养健康为导向的信息技术产业发展。(省卫生计生委牵头,省教育厅、省工信委、省农业厅、省质量技术监督局、省体育局、省食品药品监管局分工配合)全面深化数据分析和智能应用。建立营养健康数据资源目录体系,制定分级授权、分类应用、安全审查的管理规范,促进数据资源的开放共享,强化数据资源在多领域的创新应用。推动多领域数据综合分析与挖掘,开展数据分析应用场景研究,构建关联分析、趋势预测、科学预警、决策支持模型,推动整合型大数据驱动的服务体系,支持业务集成、跨部…	1	0	0	0	1	0	0	0	0	0	1	0	0	0
内蒙古自治区人民政府办公厅关于印发自治区2016年度大气污染防治实施计划的通知	三、保障措施 (四)严格考核奖惩 4.;00年12月449乌兰察布市察右前旗察右前旗裕兴炭素有限责任公司1NSH00供热1252取缔00.00.5	0	0	0	0	0	0	0	0	0	0	0	0	0	1
河南省人民政府办公厅关于做好2010年全省污染源普查动态更新调查工作的通知	四、加强组织领导 我省更新调查范围包括工业、农业、生活(含机动车)污染源和集中式污染治理设施等方面,面广源多,时间紧迫,任务繁重。各市要建立政府组织领导,环保部门牵头,公安、财政、住房城乡建设、农业、统计、畜牧等部门共同参与的更新调查工作机制,明确工作任务,落实专项经费,认真抓好落实。要明确更新调查的主要内容,既全面把握,又突出重点,确保数据质量。环保部门牵头负责更新调查工作,制定工作方案,汇总、审核和上报更新调查数据;公安机关交通管理部门负责配合有关机动车污染物排放情况的调查;财政部门负责落实专项工作经费;住房城乡建设部门负责配合集中式污染治理设施有关情况的调查;农业、畜牧部门负责配合有关种植业、畜禽养殖业和水产养殖业污染物排放情况的调查;统计部门负责及时提供有关基础数据。各有关部门要加强配合,积极协作,确保顺利完成更新调查任务,为“十二五”污染减排工作打好基础。 河南省人民政府办公厅…	0	0	0	0	1	0	0	0	0	0	0	0	0	0
青海省人民政府关于印发青海省城镇居民基本医疗保险试点工作指导意见的通知	城镇居民基本医疗保险试点工作政策性强,涉及面广,关系到广大居民的切身利益,要高度重视,加强领导,积极稳妥地进行。 全省;00年6月份全面启动,全面推行,同时确定西宁市、格尔木市为以大病统筹为主的城镇居民基本医疗保险国家试点城市,纳入国家试点城市范围。具体工作分4个阶段进行。	0	0	0	0	0	0	0	0	0	0	1	0	0	0
浙江省人民政府关于十二五时期重污染高耗能行业深化整治促进提升的指导意见	三、主要任务 (六)切实加强监管。 2.加强日常巡查。各级工商、公安等部门要密切配合,加强巡查,对无证无照经营的6大重点行业企业,发现一家取缔一家,严防“低、小、散”污染企业反弹。各级环保部门要加强对重点污染源和水气环境的定期巡查和监测,各级国土资源、农业部门要组织开展工业园区地下水位、水质的动态监测和周边农作物的监测,及时依法查处违法问题。	0	0	0	0	1	0	0	0	0	0	0	0	0	0
山西省人民政府办公厅关于印发山西省水污染防治2016年行动计划的通知	三、重点任务 (六)保障水环境安全。 3.开展饮用水水源保护区内违法建筑和排污口排查和清理工作。(省环保厅牵头,省水利厅、省发展改革委、省财政厅、省住房城乡建设厅、省卫生计生委等参与,各市人民政府负责落实)	0	0	0	0	1	0	0	0	0	0	0	0	0	0
